# Supplementary material for: Molecular-substructure Deep Autoencoders Cluster Biomolecules into Novel Band-Shaped Substructure-Distinguished Bioactivity Clusters in 3D Latent Space
Source: Research Square preprint supplement (doi:10.21203/rs.3.rs-6755378/v1), 2025-06-16

**Supplementary Figure 22** The key pharmacophoric elements of the binding modes of kinase inhibitor drugs reported in J Med Chem. 2007 Feb 8;50(3):409-24. The core pharmacophoric elements highlighted by red (core hydrogen-bond element), blue (core hydrophobic ring element) and green (linker between core elements) colors.

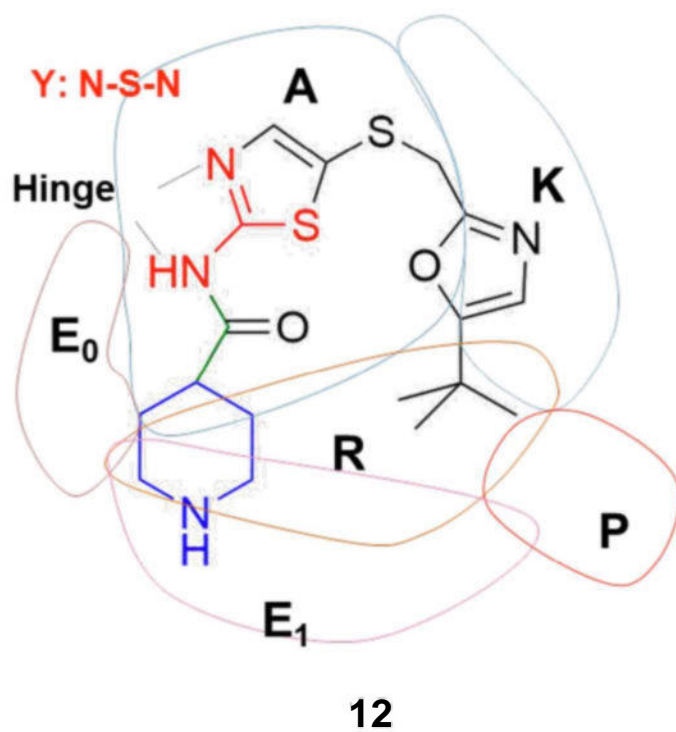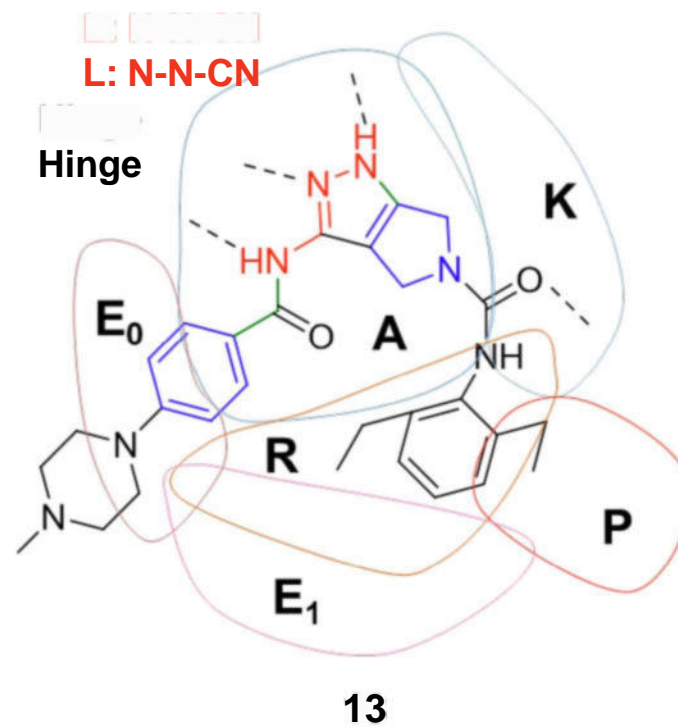

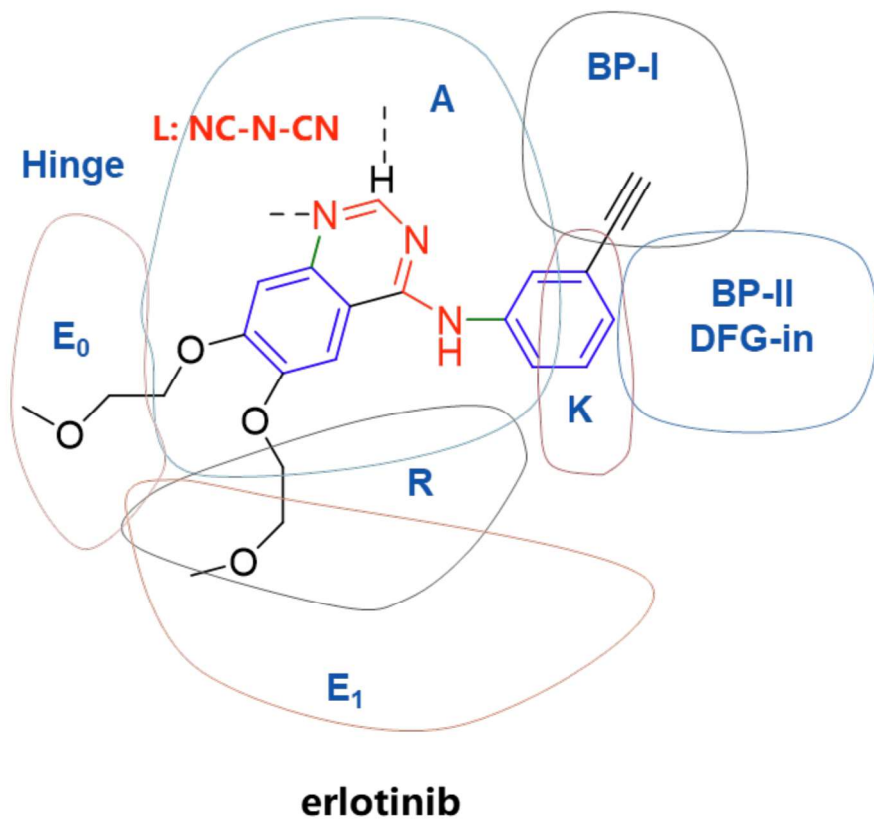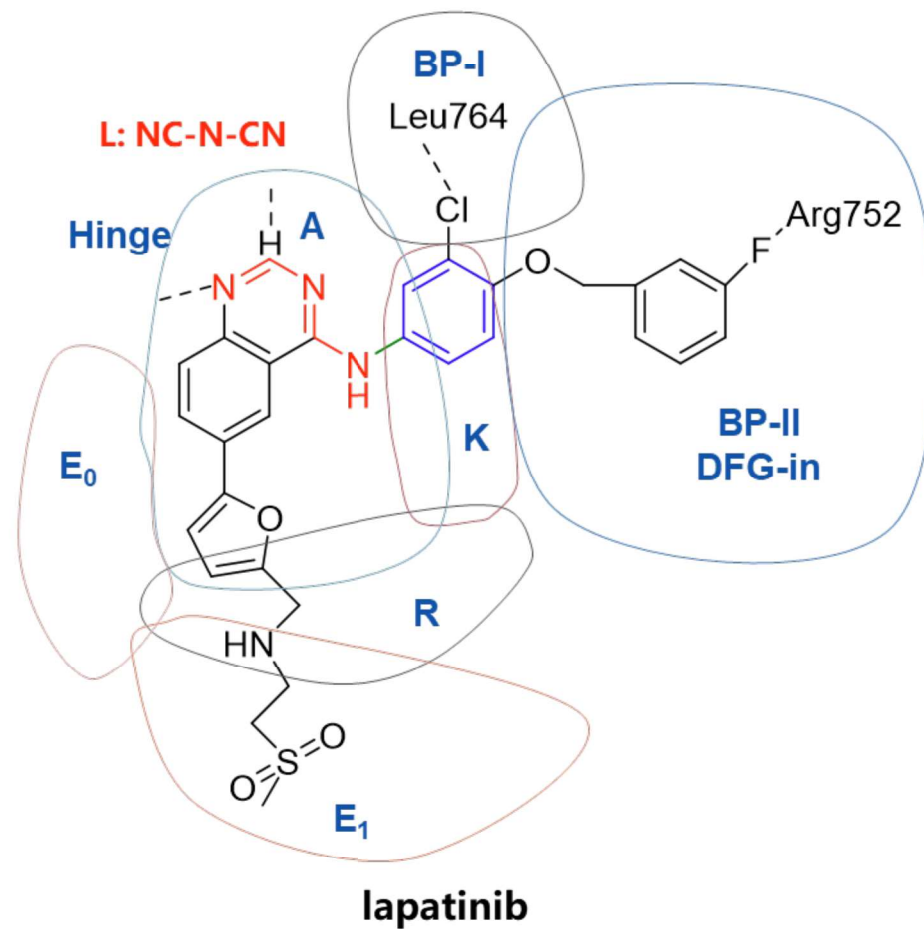

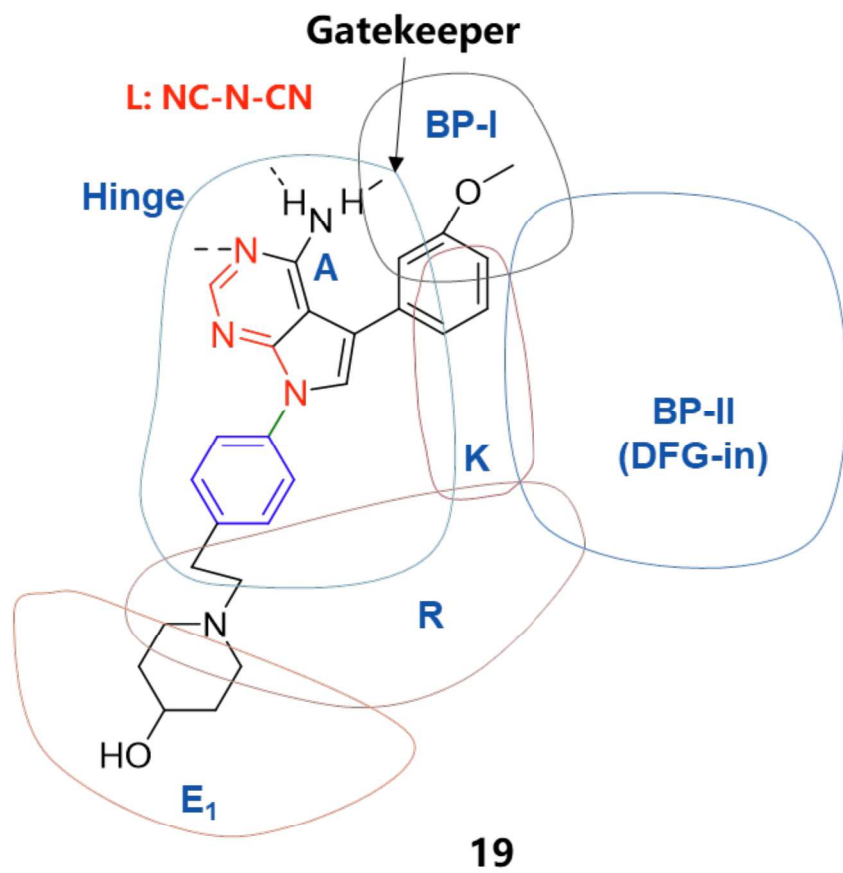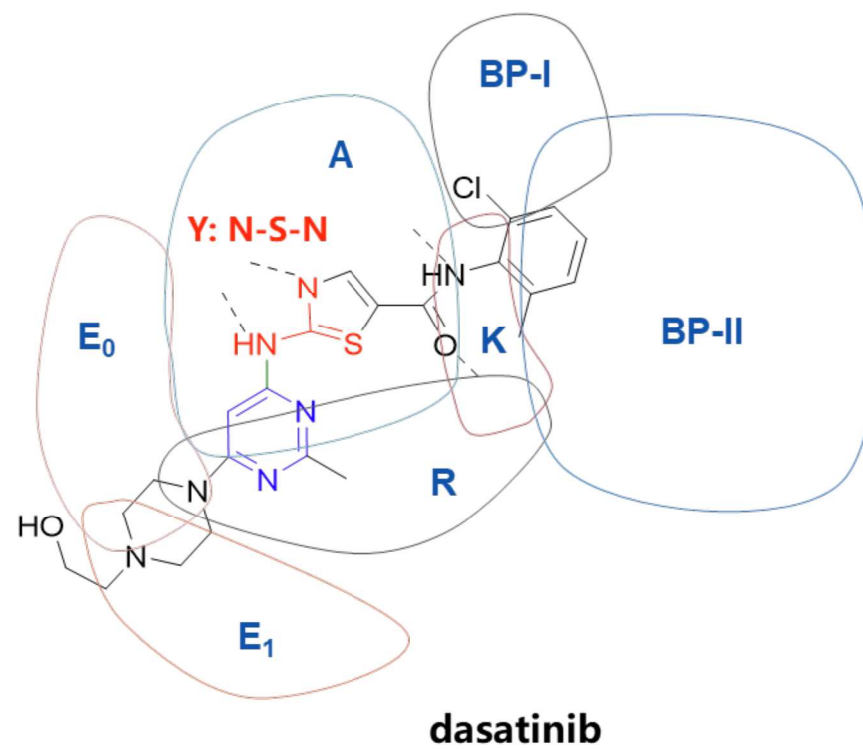

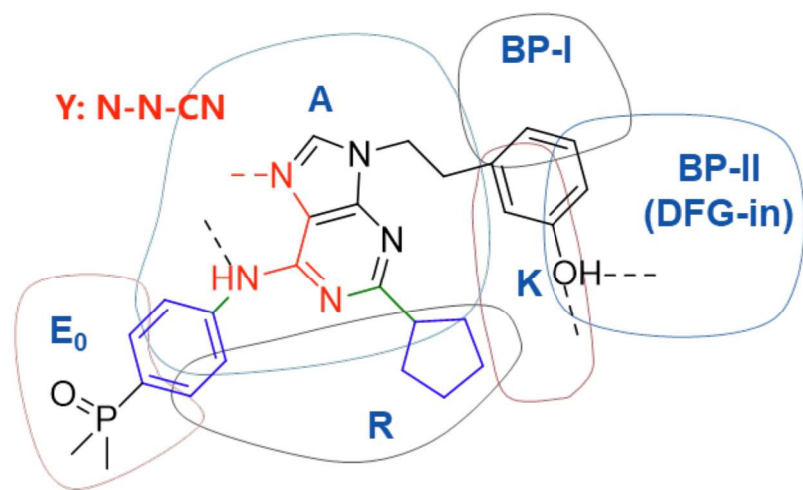

18

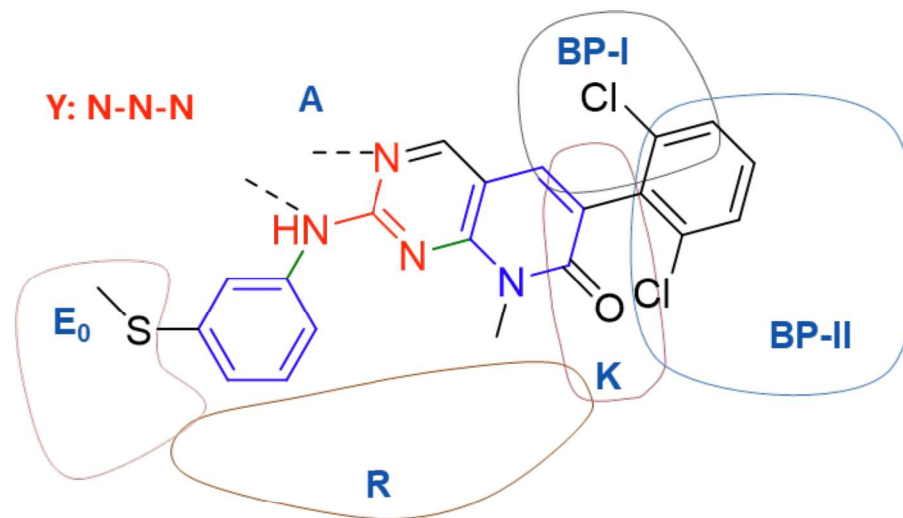

10

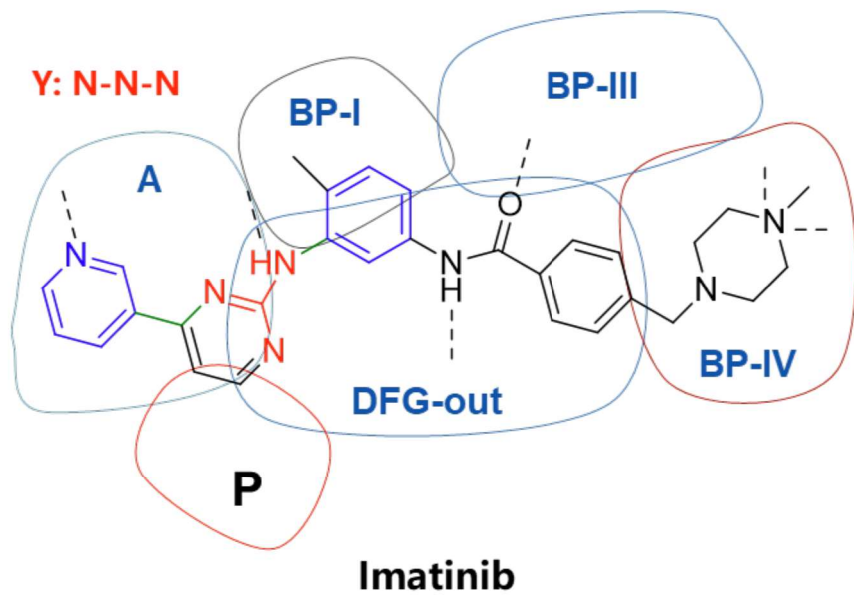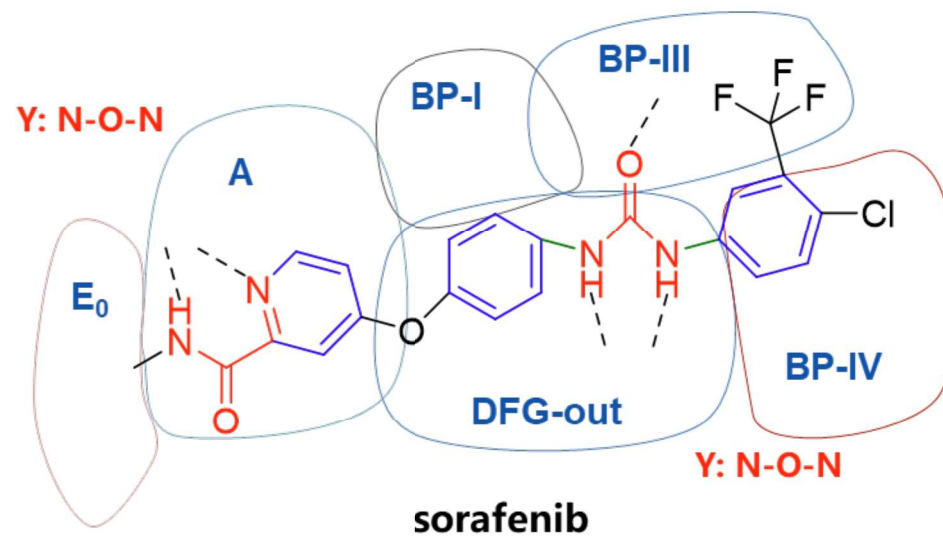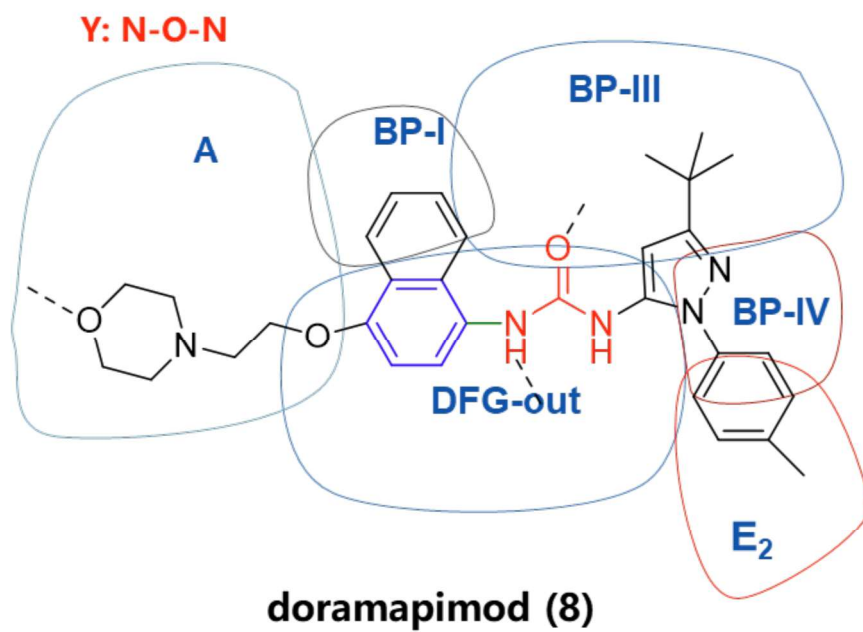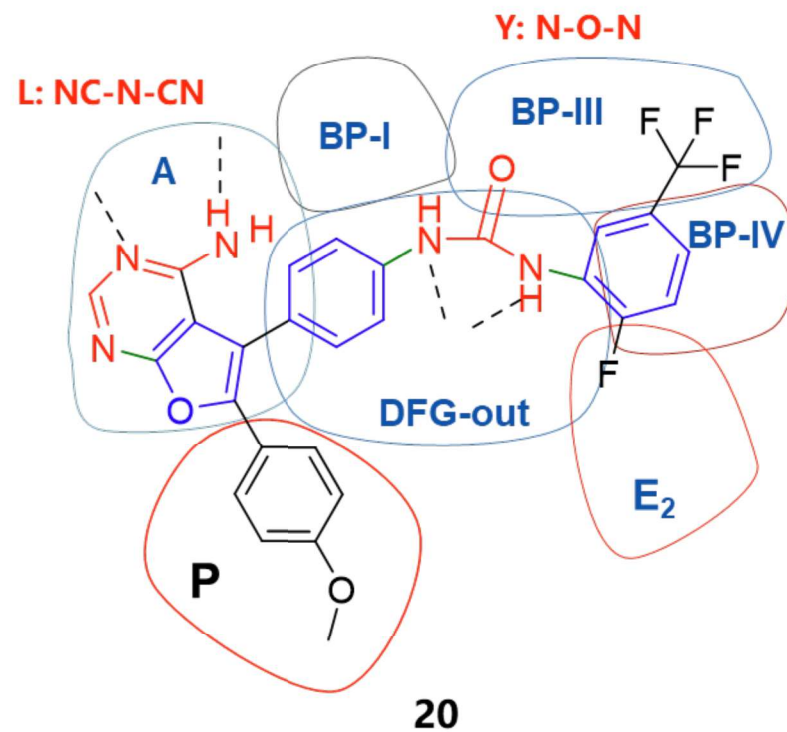

Supplement: Supplementary file 1 [file 1d5560d0e40a68c76fc81402.pdf]
