# Supplementary material for: Molecular-substructure Deep Autoencoders Cluster Biomolecules into Novel Band-Shaped Substructure-Distinguished Bioactivity Clusters in 3D Latent Space
Source: Research Square preprint supplement (doi:10.21203/rs.3.rs-6755378/v1), 2025-06-16
Supplement: Supplementary file 1 [file 11858e5498dadaf7be121c3d.xlsx]

## Sheet: supp.T7 family_property
Group	band5	Property	rank	band6	Property	rank	band1	Property	rank	band2	Property	rank
TK protein kinase group	1013	0.4331	1	5621	0.5896	1	858	0.6327	1	1134	0.5352	1
CAMK protein kinase group	716	0.3061	2	516	0.0541	6	195	0.1438	2	95	0.0448	5
TKL protein kinase group	222	0.0949	3	732	0.0768	4	105	0.0774	4	235	0.1109	3
Other protein kinase group	175	0.0748	4	788	0.0827	3	117	0.0863	3	78	0.0368	6
CMGC protein kinase group	107	0.0457	5	829	0.087	2	18	0.0133	7	327	0.1543	2
AGC protein kinase group	60	0.0257	6	597	0.0626	5	23	0.017	6	129	0.0609	4
STE protein kinase group	35	0.015	7	129	0.0135	8	35	0.0258	5	10	0.0047	8
Atypical protein kinase group	9	0.0038	8	281	0.0295	7	5	0.0037	8	41	0.0193	7
CK1 protein kinase group	2	0.0009	9	41	0.0043	9	0	0	9	7	0.0033	9
Family	band5	Property	rank
CAMK protein kinase PIM family	659	0.2949	1
Tyrosine protein kinase FGFR family	485	0.217	2
Other protein kinase TTK family	112	0.0501	3
TKL protein kinase LRRK family	106	0.0474	4
Tyrosine protein kinase JakA family	103	0.0461	5
TKL protein kinase STKR family	83	0.0371	6
Tyrosine protein kinase Met family	81	0.0362	7
Tyrosine protein kinase Src family	81	0.0362	8
Tyrosine protein kinase InsR family	72	0.0322	9
CAMK protein kinase CAMK1 family	51	0.0228	10
Family	band6	Property	rank
Tyrosine protein kinase JakA family	934	0.1014	1
Tyrosine protein kinase FGFR family	581	0.0631	2
Tyrosine protein kinase Met family	565	0.0613	3
Tyrosine protein kinase VEGFR family	536	0.0582	4
Other protein kinase AUR family	499	0.0542	5
Tyrosine protein kinase Tec family	489	0.0531	6
Tyrosine protein kinase EGFR family	470	0.051	7
Tyrosine protein kinase PDGFR family	440	0.0478	8
CMGC protein kinase MAPK family	415	0.045	9
Tyrosine protein kinase Src family	384	0.0417	10
Family	band1	Property	rank
Tyrosine protein kinase Tec family	308	0.2268	1
CAMK protein kinase MAPKAPK family	180	0.1325	2
Tyrosine protein kinase EGFR family	104	0.0766	3
Tyrosine protein kinase FGFR family	98	0.0722	4
Tyrosine protein kinase Src family	93	0.0685	5
Tyrosine protein kinase JakA family	85	0.0626	6
Other protein kinase PLK family	65	0.0479	7
Tyrosine protein kinase PDGFR family	53	0.039	8
TKL protein kinase STKR family	49	0.0361	9
Tyrosine protein kinase VEGFR family	45	0.0331	10
Family	band2	Property	rank
Tyrosine protein kinase JakA family	739	0.3841	1
Tyrosine protein kinase Met family	135	0.0702	2
Tyrosine protein kinase EGFR family	124	0.0644	3
CMGC protein kinase CDK family	111	0.0577	4
TKL protein kinase RAF family	98	0.0509	5
CAMK protein kinase PIM family	88	0.0457	6
TKL protein kinase STKR family	86	0.0447	7
AGC protein kinase AKT family	63	0.0327	8
CMGC protein kinase MAPK family	57	0.0296	9
Atypical protein kinase PIKK family	41	0.0213	10

## Sheet: supp.T8 Target_property
	Label	band1	band2	band3	band4	band5	band6
num	Kinase	2190	4440	114	1110	6745	14351
	Protease	393	495	2282	1390	1973	4032
	Nuclear receptor	126	119	138	667	147	348
	GPCR	455	231	65	836	239	1852
	others	11718	13276	12743	27383	18443	52453
	sum	14882	18561	15342	31386	27547	73036
	noother	3164	5285	2599	4003	9104	20583
property_without_other	Kinase	0.692162	0.840114	0.043863	0.277292	0.740883	0.697226
	Protease	0.12421	0.0936613	0.87803	0.34724	0.216718	0.19589
	Nuclear receptor	0.039823	0.0225166	0.0530973	0.166625	0.0161467	0.0169072
	GPCR	0.143805	0.0437086	0.0250096	0.208843	0.0262522	0.0899772
property	Kinase	0.147158	0.239211	0.00743058	0.0353661	0.244854	0.196492
	Protease	0.0264077	0.0266688	0.148742	0.0442873	0.071623	0.0552057
	Nuclear receptor	0.0084666	0.00641129	0.00899492	0.0212515	0.00533633	0.00476477
	GPCR	0.0305738	0.0124455	0.00423674	0.0266361	0.00867608	0.0253574
	others	0.787394	0.715263	0.830596	0.872459	0.66951	0.71818

## Sheet: supp.T9 substructure_property
	number of molecule(others)				property(others)					number of molecule(kinase)						property(kinase)						Enrichment ratio(kinase)
substructure_SMARTS	Band1	Band2	Band5	Band6	Band1	Band2	Band5	Band6	average	Band1	Band2	Band3	Band4	Band5	Band6	Band1	Band2	Band3	Band4	Band5	Band6	Band1	Band2	Band5	Band6
[#7]~[#6]~[#7]~[#6]	12085	13427	7085	36199	0.952175	0.950853	0.746339	0.616836	0.816551	2190	4432	311	27	2822	12570	1	0.998198	0.136284	0.0322967	0.897297	0.875897	1.22466	1.22246	1.09889	1.07268
[#7]~[#6]~[#7]~[#6]~[#7]	3676	6544	4455	11398	0.289631	0.463423	0.469293	0.194223	0.354143	1479	2784	15	2	1660	6034	0.675342	0.627027	0.00657318	0.00239234	0.527822	0.420459	1.90698	1.77055	1.49042	1.18726
a1aaaaa1~[#7]~[#6]~[#7]~[#6]	3769	3432	1286	12240	0.296959	0.243042	0.135468	0.208571	0.22101	702	2498	98	12	1509	5425	0.320548	0.562613	0.0429448	0.0143541	0.479809	0.378022	1.45038	2.54564	2.17098	1.71043
[#7]~[#6]~[#7]~[#6]~[#7]~a1aaaaa1	1332	1413	705	2981	0.104948	0.100064	0.0742652	0.0507966	0.0825184	939	2220	2	5	1381	3662	0.428767	0.5	0.000876424	0.00598086	0.43911	0.255174	5.19602	6.05925	5.32135	3.09233
a1aaaa1~[#7]~[#6]~[#7]~[#6]	2852	2271	1224	4532	0.224708	0.160824	0.128937	0.0772259	0.147924	890	1961	39	5	752	5562	0.406393	0.441667	0.0170903	0.00598086	0.23911	0.387569	2.74731	2.98577	1.61644	2.62005
[#7]~[#6]~[#7]~[#6]~a1aaaa1	3395	3487	1483	5817	0.267491	0.246937	0.15622	0.0991224	0.192443	1362	1794	36	10	1130	7537	0.621918	0.404054	0.0157756	0.0119617	0.3593	0.52519	3.2317	2.09961	1.86705	2.72907
[#7]~[#6]~[#7]~[#6]~a1aaaaa1	5561	5272	2014	9428	0.43815	0.373345	0.212156	0.160654	0.296076	950	1649	21	2	952	2992	0.43379	0.371396	0.00920245	0.00239234	0.302703	0.208487	1.46513	1.25439	1.02238	0.704167
[#7]~[#6]~[#7]~[#6]~[#6]~[#7]	3088	5932	2303	13256	0.243303	0.420084	0.2426	0.225884	0.282968	271	1452	140	0	946	3860	0.123744	0.327027	0.0613497	0	0.300795	0.268971	0.437309	1.15571	1.063	0.950536
[#7]~[#6]~[#7]~[#6]~[#7]~a1aaaa1	564	1457	844	2524	0.0444374	0.10318	0.0889076	0.0430093	0.0698835	659	1095	0	0	594	1666	0.300913	0.246622	0	0	0.188871	0.116089	4.30593	3.52904	2.70266	1.66119
[#7]~[#6](~a1aaaaa1)~[#7]~[#6]	1469	2339	1192	4716	0.115742	0.16564	0.125566	0.0803613	0.121827	974	956	7	2	670	3208	0.444749	0.215315	0.00306748	0.00239234	0.213037	0.223538	3.65065	1.76738	1.74868	1.83488
[#7]~[#6]~[#7]~[#6](~a1aaaaa1)~[#7]	949	1484	916	1877	0.0747715	0.105092	0.0964922	0.0319843	0.0770849	208	866	2	0	688	2840	0.0949772	0.195045	0.000876424	0	0.21876	0.197896	1.23211	2.53026	2.83791	2.56724
a1aaaaa1~[#7]~[#6]~[#7]~[#6]~[#7]~a1aaaaa1	347	121	16	591	0.0273401	0.0085688	0.00168545	0.0100707	0.0119163	628	834	2	0	469	2197	0.286758	0.187838	0.000876424	0	0.149126	0.15309	24.0644	15.7632	12.5145	12.8472
[#7]~[#6]~[#7]~[#6]~[#16]	2938	2726	785	2270	0.231484	0.193046	0.0826925	0.0386811	0.136476	579	707	0	0	310	1745	0.264384	0.159234	0	0	0.0985692	0.121594	1.93722	1.16676	0.722246	0.890958
a1aaaaa1~[#7]~[#6]~[#7]~[#6]~[#7]~a1aaaa1	111	190	73	249	0.00874567	0.0134551	0.00768988	0.00424299	0.00853342	170	586	21	0	163	1577	0.0776256	0.131982	0.00920245	0	0.0518283	0.109888	9.09666	15.4665	6.07357	12.8773
[#7]~[#6](~[#16])~[#7]	5447	3127	894	5031	0.429168	0.221443	0.0941747	0.0857289	0.207629	292	581	61	15	49	636	0.133333	0.130856	0.0267309	0.0179426	0.0155803	0.0443175	0.642172	0.63024	0.0750392	0.213446
[#7]~[#6](~[#7])~[#7]	1401	2813	1531	10819	0.110384	0.199207	0.161277	0.184357	0.163806	469	445	27	2	46	525	0.214155	0.100225	0.0118317	0.00239234	0.0146264	0.0365828	1.30737	0.611852	0.0892908	0.22333
[#7]~[#6](~[#8])~[#7]	1917	281	0	6886	0.15104	0.0198994	0	0.117338	0.0720694	99	397	11	6	301	1990	0.0452055	0.0894144	0.00482033	0.00717703	0.0957075	0.138666	0.627249	1.24067	1.32799	1.92406
a1aaaaa1~[#7]~[#6](~[#8])~[#7]	736	104	0	3087	0.0579893	0.00736492	0	0.0526029	0.0294893	63	377	0	0	132	1157	0.0287671	0.0849099	0	0	0.0419714	0.0806216	0.975512	2.87935	1.42328	2.73393
[#7]~[#6](~[#7])~[#7]~a1aaaaa1	427	706	290	2125	0.0336432	0.0499965	0.0305488	0.0362103	0.0375997	66	350	0	0	263	864	0.030137	0.0788288	0	0	0.0836248	0.0602049	0.801522	2.09653	2.22408	1.60121
[#7]~[#6]~[#7](~a1aaaaa1)~[#6]	1802	1845	729	5593	0.141979	0.130656	0.0767934	0.0953054	0.111184	26	286	1	0	117	290	0.0118721	0.0644144	0.000438212	0	0.0372019	0.0202077	0.10678	0.579352	0.334599	0.18175
a1aaaaa1~[#7]~[#6]~[#7]~[#6]~[#16]	665	138	33	186	0.0523952	0.00977268	0.00347625	0.00316946	0.0172034	536	263	0	0	148	1613	0.244749	0.0592342	0	0	0.0470588	0.112396	14.2268	3.44317	2.73544	6.53338
[#7]~[#6]~[#7](~a1aaaaa1)~[#6]~[#16]	244	192	85	111	0.0192247	0.0135968	0.00895397	0.00189145	0.0109167	56	230	11	0	345	241	0.0255708	0.0518018	0.00482033	0	0.109698	0.0167933	2.34235	4.74518	10.0486	1.53831
a1aaaaa1~[#7]~[#6]~[#7]~[#6]~[#6]~[#7]	530	651	167	2127	0.0417586	0.0461016	0.0175919	0.0362444	0.0354241	70	191	1	0	94	437	0.0319635	0.043018	0.000438212	0	0.0298887	0.0304508	0.902309	1.21437	0.843739	0.859608
a1aaaaa1~[#7]~[#6](~[#16])~[#7]	1435	1067	183	1861	0.113063	0.0755612	0.0192774	0.0317117	0.0599034	308	187	0	0	135	390	0.140639	0.0421171	0	0	0.0429253	0.0271758	2.34777	0.703084	0.716575	0.45366
[#7]~[#6](~[#16]~a1aaaaa1)~[#7]	578	403	51	600	0.0455405	0.0285391	0.00537238	0.0102241	0.022419	24	164	19	0	52	199	0.0109589	0.0369369	0.00832603	0	0.0165342	0.0138666	0.488822	1.64757	0.737507	0.618521
[#7]~[#6](~a1aaaaa1)~[#7]~[#6]~[#6]~[#7]	286	567	357	922	0.0225339	0.040153	0.0376067	0.015711	0.0290011	5	161	0	0	28	147	0.00228311	0.0362613	0	0	0.00890302	0.0102432	0.0787247	1.25034	0.306989	0.3532
a1aaaa1~[#7]~[#6](~[#8])~[#7]	657	47	0	765	0.0517649	0.00332838	0	0.0130357	0.0170322	96	125	7	3	6	327	0.0438356	0.0281532	0.00306748	0.00358852	0.00190779	0.0227859	2.57368	1.65293	0.112011	1.33781
[#7]~[#6](~[#7])~[#7]~a1aaaa1	298	375	264	902	0.0234794	0.0265562	0.02781	0.0153702	0.0233039	5	105	1	0	7	23	0.00228311	0.0236486	0.000438212	0	0.00222576	0.00160268	0.0979708	1.01479	0.0955099	0.0687728
[#7]~[#6]~[#7]~[#6]~[#6]~[#7]~a1aaaaa1	497	1008	429	1764	0.0391585	0.071383	0.0451912	0.0300588	0.0464479	39	104	0	0	2	29	0.0178082	0.0234234	0	0	0.00063593	0.00202077	0.383402	0.504295	0.0136913	0.0435061
[#7]~[#6]~[#7]~[#6]~[#6](~a1aaaaa1)~[#7]	339	350	86	569	0.0267097	0.0247858	0.00905931	0.00969583	0.0175627	76	103	0	3	13	263	0.0347032	0.0231982	0	0.00358852	0.00413355	0.0183262	1.97596	1.32088	0.23536	1.04348
a1aaaaa1~[#7]~[#6]~[#7]~[#6]~a1aaaaa1	743	531	94	1653	0.0585408	0.0376036	0.00990203	0.0281673	0.0335534	41	103	13	0	221	1113	0.0187215	0.0231982	0.00569676	0	0.0702703	0.0775556	0.55796	0.691381	2.09428	2.3114
[#7]~[#6](~a1aaaaa1)~[#7]~[#6]~[#16]	445	641	307	356	0.0350615	0.0453934	0.0323396	0.00606629	0.0297152	22	87	0	2	13	125	0.0100457	0.0195946	0	0.00239234	0.00413355	0.00871019	0.338065	0.659413	0.139105	0.293123
[#7]~[#6](~[#8]~a1aaaaa1)~[#7]	40	0	0	157	0.00315159	0	0	0.0026753	0.00145672	6	73	9	0	3	108	0.00273973	0.0164414	0.00394391	0	0.000953895	0.00752561	1.88075	11.2866	0.654823	5.16612
a1aaaa1~[#7]~[#6]~[#7]~[#6]~[#6]~[#7]	307	191	127	425	0.0241885	0.013526	0.0133783	0.00724206	0.0145837	20	63	1	6	0	124	0.00913242	0.0141892	0.000438212	0.00717703	0	0.00864051	0.626208	0.972949	0	0.592478
[#7]~[#6]~[#7]~[#6](~a1aaaaa1)~[#6]~[#7]	171	493	35	419	0.0134731	0.0349125	0.00368693	0.00713981	0.0148031	12	62	0	5	0	80	0.00547945	0.013964	0	0.00598086	0	0.00557452	0.370156	0.943314	0	0.376579
[#7]~[#6]~[#7]~[#6]~[#16]~a1aaaaa1	190	210	45	211	0.0149701	0.0148715	0.00474033	0.00359547	0.00954433	270	40	94	9	0	2374	0.123288	0.00900901	0.0411919	0.0107656	0	0.165424	12.9174	0.943912	0	17.3322
[#8]~[#7]~[#8]	205	378	0	2638	0.0161519	0.0267686	0	0.0449519	0.0219681	2	34	18	2	19	46	0.000913242	0.00765766	0.00788782	0.00239234	0.00604134	0.00320535	0.0415713	0.348581	0.275005	0.145909
[#7]~[#6]~[#7]~[#6](~a1aaaaa1)~[#16]	167	48	1	64	0.0131579	0.00339919	0.000105341	0.00109057	0.00443825	125	30	7	1	7	57	0.0570776	0.00675676	0.00306748	0.00119617	0.00222576	0.00397185	12.8604	1.52239	0.501494	0.894913
[#8]~[#7](~a1aaaaa1)~[#8]	140	268	0	1958	0.0110306	0.0189788	0	0.0333646	0.0158435	5	15	0	0	0	49	0.00228311	0.00337838	0	0	0	0.0034144	0.144104	0.213234	0	0.215508
[#7]~[#6]~[#7](~a1aaaaa1)~[#6]~[#6]~[#7]	194	186	233	506	0.0152852	0.0131719	0.0245444	0.00862231	0.0154059	224	14	27	7	0	2083	0.102283	0.00315315	0.0118317	0.00837321	0	0.145147	6.6392	0.204671	0	9.42147
[#8]~[#7](~a1aaaa1)~[#8]	61	94	0	304	0.00480618	0.00665675	0	0.0051802	0.00416078	99	12	0	0	0	32	0.0452055	0.0027027	0	0	0	0.00222981	10.8647	0.649566	0	0.535911
[#7]~[#6]~[#7](~a1aaaaa1)~[#6]~[#7]	192	312	411	390	0.0151276	0.0220948	0.0432951	0.00664565	0.0217908	70	7	1	1	0	317	0.0319635	0.00157658	0.000438212	0.00119617	0	0.0220891	1.46683	0.0723506	0	1.01369
a1aaaa1~[#7]~[#6]~[#7]~[#6]~[#16]	122	262	32	58	0.00961235	0.0185539	0.0033709	0.000988328	0.00813138	4	5	0	0	0	3	0.00182648	0.00112613	0	0	0	0.000209045	0.224622	0.138491	0	0.0257084
[#7]~[#6]~[#7]~[#6]~[#6]~[#7]~a1aaaa1	69	86	17	284	0.0054365	0.00609022	0.00179079	0.0048394	0.00453923	0	3	0	0	0	1	0	0.000675676	0	0	0	6.96816e-05	0	0.148853	0	0.015351
[#7]~[#6]~[#7]~[#6]~[#16]~a1aaaa1	49	122	14	27	0.0038607	0.00863961	0.00147477	0.000460083	0.00360879	13	2	0	0	0	11	0.00593607	0.00045045	0	0	0	0.000766497	1.64489	0.12482	0	0.212397
a1aaaa1~[#7]~[#6](~[#16])~[#7]	512	223	39	126	0.0403404	0.0157921	0.00410829	0.00214706	0.015597	6	1	1	2	0	35	0.00273973	0.000225225	0.000438212	0.00239234	0	0.00243885	0.175658	0.0144403	0	0.156367
a1aaaaa1~[#7]~[#6]~[#7]~[#6]~a1aaaa1	174	361	56	514	0.0137094	0.0255648	0.00589908	0.00875863	0.013483	35	0	0	7	0	125	0.0159817	0	0	0.00837321	0	0.00871019	1.18533	0	0	0.646014
[#7]~[#6](~[#8]~a1aaaa1)~[#7]	1	0	0	0	7.87898e-05	0	0	0	1.96974e-05					315	336	0	0	0	0	0.100159	0.023413	0	0	5084.87	1188.63
[#7]~[#6](~[#16]~a1aaaa1)~[#7]	26	46	6	15	0.00204853	0.00325756	0.000632045	0.000255602	0.00154844	0	0	0	0	0	0	0	0	0	0	0	0	0	0	0	0
a1aaaaa1~[#8]~[#7]~[#8]	0	0	0	1	0	0	0	1.70401e-05	4.26003e-06	0	0	0	0	0	0	0	0	0	0	0	0	0	0	0	0
a1aaaa1~[#8]~[#7]~[#8]	0	0	0	0	0	0	0	0	0	0	0	0	0	0	0	0	0	0	0	0	0	#DIV/0!	#DIV/0!	#DIV/0!	#DIV/0!
Total	12692	14121	9493	58685	1	1	1	1	1	2190	4440	2282	836	3145	14351	1	1	1	1	1	1

## Sheet: supp.T10 Network
Table 10: Network Framework Parameters for Three Types of Molecular Fingerprints
Molecular Fingerprint	Parameter ID	Encoder Network Layers	Encoder Structure	Total Parameters	MSE
PubChemFP	Parameter 1	5	1024-512-128-64-32	2697564	0.0245
MACCSFP	Parameter 9	6	512-1024-512-256-64-32	2574380	0.039
PharmacoPFP	Parameter 1	6	512-1024-512-256-64-32	2697380	0.0245

## Sheet: supp.T11 Band1-Pubchem
All data points in band1												island1 in band1						island2 in band1										island3 in band1
	Unnamed: 0	ID	Smiles	Protease	Nuclear receptor	kinase	G-protein coupled receptor	X	Y	Z		type	ID	posX	posY	posZ		type	ID	posX	posY	posZ	posX_4dp	Matched_SMILES	Matched_ID	r		type	ID	posX	posY	posZ	posX_4dp	Matched_SMILES	Matched_ID	r
232	232	CHEMBL2018975	COc1ccc(C=NNC(=O)Cn2c(CSc3ccccc3)nc3ccccc32)cc1	0	0	0	0	49.3147	38.8703	30.8332		1	215022	30.4204	13.0681	18.8761		64	1361974	53.0139	18.3065	32.3548	53.0139	CCOC(=O)N1CCN(c2nc(-c3cccc(OC)c3)cc(C(F)(F)F)n2)CC1	CHEMBL1361974	64.749		64	1939655	34.0709	10.7452	16.0156	34.0709	COc1cc2c(Nc3ccc4sc(C(=O)Nc5c(C)cccc5Cl)cc4c3)ncnc2cc1OCCCN1CCOCC1	CHEMBL1939655	39.1508
328	328	CHEMBL2019128	COc1cc(N)ccc1-c1nc2snc(-c3ccccc3F)c2c(=O)[nH]1	0	0	0	0	36.1918	21.7559	22.0709		1	215203	30.4069	13.0568	18.8753		49	3715080	51.3816	17.9638	31.2381	51.3816	Cc1ccc(OCCSc2nc(-c3ccccc3C)nc3cc(=O)[nH]n23)cc1Cl	CHEMBL1571724	62.7582		1	3923526	39.5077	12.4922	17.5128	39.5077	COc1ccc2[nH]c(-c3c(N[C@H]4CCCNC4)c4cc(Cl)sc4[nH]c3=O)nc2c1	CHEMBL3330232	44.9846
396	396	CHEMBL1595793	COc1ccc(N2CCN(S(=O)(=O)c3c(C)nc4sccn4c3=O)CC2)cc1	0	0	0	0	17.7489	16.1206	19.2874		1	3702844	31.3117	13.1006	19.3276		64	1722735	53.4126	18.645	32.2831	53.4126	O=C(COc1ncnc2ccc(Br)cc12)N1CCOCC1	CHEMBL1722735	65.1363		1	500640	36.3027	11.3796	16.3794	36.3027	CCOC(=O)O[C@H]1CN[C@H](C#Cc2cc3ncnc(Nc4ccc(OCc5cccc(F)c5)c(Cl)c4)c3s2)C1	CHEMBL500640	41.4206
516	516	CHEMBL1203471	CC(=O)Oc1ccc(-c2csc(NC(=N)NCc3ccccc3)n2)cc1OC(C)=O.Cl	0	0	0	0	28.358	20.7456	21.8482		1	3702833	31.4107	13.1334	19.2689		1	337826	52.0504	18.304	31.3868	52.0504	COc1cc2ncnc(N3CCN(C(=O)N(C)c4ccc(Br)cc4)CC3)c2cc1OC	CHEMBL337826	63.4776		1	1964265	37.6763	11.8096	17.1287	37.6763	C[C@@H](Oc1cc(-n2cnc3ccc(O[C@@H]4CCCN(C)CC4)cc32)sc1C(N)=O)c1ccccc1Cl	CHEMBL1964265	43.0391
615	615	CHEMBL2063683	COc1nc2sccn2c1/C=C1/C(=O)Nc2cccc(Cl)c21	0	0	0	0	33.0721	29.5405	20.7831		1	3702835	31.2823	13.1246	19.1136		64	3446894	53.4227	18.4289	32.7124	53.4227	COc1ccc(C2CN(c3nc(C)cc(C)n3)CCN2C(C)=O)cc1	CHEMBL3446894	65.2971		64	3605344	38.484	11.9052	17.1347	38.484	COc1ccc2nc(NC(=O)CCCCN3CCN(c4ccc(Cl)cc4)CC3)sc2c1	CHEMBL3605344	43.7761
878	878	CHEMBL1351663	COc1ccc(N2CCN(C(=O)CSc3nnc4c5cc(C)ccc5n(C)c4n3)CC2)cc1	0	0	0	0	52.287	16.1787	31.3977		1	3913230	31.3148	13.1245	19.3288		64	3477649	53.0586	18.3625	32.4416	53.0586	COc1ccccc1CN1C(=O)O[C@@H]2CN(c3nc(C)cc(C)n3)C[C@@H]21	CHEMBL3477649	64.8448		64	555974	40.5705	12.9632	17.7816	40.5705	COc1cc2nc(N3CCN(C(=O)/C=C/c4ccc(Cl)s4)CC3)nc(N)c2cc1OC.Cl	CHEMBL555974	46.154
899	899	CHEMBL2431592	CCOc1cc(C(Nc2ccc3nc(N)[nH]c3c2)C(=O)NS(=O)(=O)c2ccccc2)ccc1OC(C)C	1	0	0	0	15.2778	11.9911	15.4369		1	3979355	31.093	13.0863	19.0365		49	3714778	48.1339	16.7319	29.1782	48.1339	CC(C)(Oc1ccc2c(c1)CCn1c-2cc(OCC2COc3ccccc3O2)nc1=O)C(=O)N1CCOCC1	CHEMBL3714778	58.7213		64	1652670	39.3907	12.3938	17.5625	39.3907	Nc1nc(N2CCN(C(=O)COc3ccc(Cl)cc3)CC2)c2nc(CCOc3ccc(F)cc3)sc2n1	CHEMBL1652670	44.874
1186	1186	CHEMBL408421	O=C(c1cccs1)c1cnn2c1n[n+]([O-])c1ccc(Oc3ccccc3)cc12	0	0	0	0	36.4346	21.3627	28.7809		1	3702854	31.093	13.0863	19.0365		49	3714783	53.6263	18.787	32.3938	53.6263	CCCCCc1ccc2c(c1)CCn1c-2cc(OC[C@H]2COCCO2)nc1=O	CHEMBL3714783	65.4071		64	2325140	32.817	10.172	15.4758	32.817	O=C(NCCOc1ccc2sc(CNc3nncc(-c4c(Cl)cccc4Cl)n3)nc2c1)[C@@H]1CSC(c2ccccc2O)=N1	CHEMBL2325140	37.6819
1212	1212	CHEMBL1600039	COc1cc(NS(=O)(=O)c2ccc(NC(=O)COc3ccccc3C)cc2)nc(OC)n1	0	0	0	0	23.5917	20.7564	19.4084		1	3702832	31.2857	13.1955	19.2287		49	3714785	51.8897	18.1221	31.457	51.8897	CC(C)(C)COCc1ccc2c(c1)CCn1c-2cc(OC[C@@H]2COCCO2)nc1=O	CHEMBL3714785	63.3285		64	1652676	39.1852	12.4024	17.4558	39.1852	Nc1nc(N2CCN(C(=O)COc3ccc(Cl)cc3)CC2)c2nc(-c3ccncc3)sc2n1	CHEMBL1652676	44.6543
1609	1609	CHEMBL517123	CN(C)C(=O)O[C@H]1CN[C@H](C#Cc2cc3ncnc(Nc4ccc(OCc5cccc(F)c5)c(Cl)c4)c3s2)C1	0	0	3	0	36.309	11.3767	16.4348		1	3902505	31.4894	13.1824	19.3322		49	3714806	51.9116	18.196	31.1994	51.9116	O=c1nc(OC[C@H]2COCCO2)cc2n1CCc1cc(OCCCC3CC3)ccc1-2	CHEMBL3714806	63.2401		64	1877474	36.309	11.3767	16.4348	36.309	CN(C)C(=O)O[C@H]1CN[C@H](C#Cc2cc3ncnc(Nc4ccc(OCc5cccc(F)c5)c(Cl)c4)c3s2)C1	CHEMBL517123	41.4473
1868	1868	CHEMBL473629	COc1cc2ncn(-c3cc(OCCc4ccccc4)c(C(N)=O)s3)c2cc1OC	0	0	3	0	33.7997	29.5037	26.266		1	3702858	31.3572	13.156	19.2889		49	3714958	48.9848	17.1629	29.7011	48.9848	O=c1nc(OCC2CCCO2)cc2n1CCc1cc(OCC3COc4ccccc4O3)ccc1-2	CHEMBL3714958	59.8016		64	185174	38.4548	11.8712	17.4769	38.4548	Cc1nc2cc(OC[C@H](O)CN3CCN(Cc4noc(-c5ccc(Cl)cc5Cl)n4)C[C@@H]3C)ccc2s1	CHEMBL185174	43.8764
1950	1950	CHEMBL512076	CCNC(=O)O[C@H]1CN[C@H](C#Cc2cc3ncnc(Nc4ccc(OCc5cccc(F)c5)c(Cl)c4)c3s2)C1	0	0	3	0	35.3469	11.042	16.1621		1	3985927	31.2857	13.1955	19.2287		49	3715047	51.6883	18.0475	31.3997	51.6883	CC(C)N(C)C(=O)COc1ccc2c(c1)CCn1c-2cc(OCC2CCCO2)nc1=O	CHEMBL3715047	63.1137		64	3928175	35.228	10.8342	16.0756	35.228	COc1ccc2nc(NC(=O)Nc3ccccc3N3CC4(CCN(CC(C)(C)C)CC4)c4c(-c5nc6cc(Cl)ccc6s5)ccc(O)c43)sc2c1	CHEMBL3928175	40.2097
2143	2143	CHEMBL1989217	CCOC(=O)c1nc2c3c(ncn2n1)Oc1c(c(-c2ccccc2)nn1-c1ccccc1)C3c1ccc(OC)c(OC)c1	0	0	0	0	50.7918	34.9076	36.75		1	3942079	31.4107	13.1334	19.2689		49	3714904	53.6953	18.8245	32.3411	53.6953	CC(C)C#Cc1ccc2c(c1)CCn1c-2cc(OC[C@@H]2COCCO2)nc1=O	CHEMBL3715064	65.4484		1	508760	34.6041	10.7956	16.0885	34.6041	O=C(O[C@H]1CN[C@H](C#Cc2cc3ncnc(Nc4ccc(OCc5cscn5)c(Cl)c4)c3s2)C1)N1CCOCC1	CHEMBL508760	39.6589
2164	2164	CHEMBL1514307	COCCn1c(=O)c(-c2cccs2)nc2cnc(Oc3cccc(Cl)c3)nc21	0	0	0	0	33.0647	26.7542	32.1222		1	3702850	31.3148	13.1245	19.3288		49	3715088	52.3409	18.3425	31.5331	52.3409	O=c1nc(OC[C@@H]2COCCO2)cc2n1CCc1cc(OCC3CC3)ccc1-2	CHEMBL3715088	63.7993		64	546076	36.0262	11.2967	16.2702	36.0262	CCOC(=O)N[C@@H]1CN[C@@H](C#Cc2cc3c(Nc4ccc(OCc5cccc(F)c5)c(Cl)c4)ncnc3s2)C1	CHEMBL546076	41.1123
2615	2615	CHEMBL518953	NC(=O)c1sc(-n2cnc3ccccc32)cc1OCc1ccccc1Br	0	0	3	0	33.2736	29.5514	23.0435		1	3967056	31.3117	13.1006	19.3276		49	3715192	52.8693	18.5303	31.8295	52.8693	O=c1nc(OCC2COCCO2)cc2n1CCc1cc(C#CC3CCCCC3)ccc1-2	CHEMBL3715192	64.4333		64	81337	41.3612	12.7958	18.2561	41.3612	CC(C)C(=O)N1CCC(CNc2nc3c(s2)CCOc2cc(Cl)c(F)cc2-3)CC1	CHEMBL81337	46.9869
2656	2656	CHEMBL3793177	CCOC(=O)COc1nc(C)nc2c(-c3ccc(Cl)cc3)n[nH]c12	0	0	0	0	51.7197	35.2339	26.0505		1	3702845	31.7501	13.3949	19.3106		49	3715227	50.5741	17.7187	30.8418	50.5741	Cc1ccccc1COc1ccc2c(c1)CCn1c-2cc(OCC2CCCO2)nc1=O	CHEMBL3715227	61.8297		64	3893034	36.8157	11.5515	16.9298	36.8157	COc1cc(-n2cnc3cc(-c4ccc(Cl)cc4)sc3c2=O)ccc1OCC1(OC(=O)CN)COC1	CHEMBL3893034	42.1361
2870	2870	CHEMBL1467014	Cc1csc2ncc(C(=O)NCc3ccc4c(c3)OCO4)c(=O)n12	0	0	0	0	33.2849	27.2534	25.3763		1	3918726	31.8034	13.3645	19.2207		49	3715368	50.9528	17.847	31.135	50.9528	COc1ccccc1-c1ccc2c(c1)CCn1c-2cc(OCC2CCCO2)nc1=O	CHEMBL3715368	62.3225		64	81337	41.3612	12.7958	18.2561	41.3612	CC(C)C(=O)N1CCC(CNc2nc3c(s2)CCOc2cc(Cl)c(F)cc2-3)CC1	CHEMBL81337	46.9869
2958	2958	CHEMBL400431	CCc1nc(N)nc(N)c1-c1ccc2c(c1)N(CCCOC)C(=O)C(C)(C)O2	1	0	0	0	37.7256	13.2235	21.1377		1	3702836	32.0136	13.3618	19.3426		49	3715443	52.1561	18.2346	31.6217	52.1561	CC(C)(C)OCc1ccc2c(c1)CCn1c-2cc(OCC2COCCO2)nc1=O	CHEMBL3715443	63.6608		64	1939659	33.3639	10.5155	15.7307	33.3639	COc1cc2c(Nc3ccc4sc(C(=O)Nc5c(C)cccc5Cl)cc4c3)ncnc2cc1OCCCN1CCN(C)CC1	CHEMBL1939659	38.356
3003	3003	CHEMBL529877	COc1ccc(NC(=O)Nc2nc(-c3ccc(Cl)c(C)c3)cs2)cc1N1CCN(C)CC1.Cl	0	0	0	0	39.2932	12.1708	17.2837		1	3933784	31.7501	13.3949	19.3106		49	3715459	51.273	17.9038	31.0519	51.273	N#CCOc1ccc2c(c1)CCn1c-2cc(OCC2COCCO2)nc1=O	CHEMBL3715459	62.5595		64	545837	39.2977	12.1789	17.2725	39.2977	COc1ccc(NC(=O)Nc2nc(-c3ccc(Cl)c(C)c3)cs2)cc1N1CCN(C)CC1	CHEMBL545837	44.6203
3011	3011	CHEMBL1425039	CCOc1ccccc1NC(=O)N1CCCC(c2nc(O)c3nnn(Cc4ccc(C)cc4)c3n2)C1	0	0	0	0	49.9762	22.3251	26.8748		1	3900330	32.0392	13.3648	19.6604		49	3715467	53.5012	18.7614	32.2895	53.5012	C=CCOc1ccc2c(c1)CCn1c-2cc(OCC2CCCO2)nc1=O	CHEMBL3715467	65.2455		64	3983590	36.7584	10.9253	16.4848	36.7584	CC(C)(C)CN1CCC2(CC1)CN(c1ccccc1NC(=O)Nc1ccc(OC(F)(F)F)cc1)c1c(O)cc(F)c(-c3nc4cc(Cl)ccc4s3)c12	CHEMBL3983590	41.7408
3073	3073	CHEMBL240355	CCc1nc(N)nc(N)c1-c1ccc2c(c1)N(CCNC(C)=O)C(=O)C(C)(C)O2	1	0	0	0	37.0491	12.9245	20.8924		1	3702841	32.0417	13.38	19.3236		49	3715514	53.9103	18.8987	32.4998	53.9103	CCCC#Cc1ccc2c(c1)CCn1c-2cc(OCC2COCCO2)nc1=O	CHEMBL3715514	65.7246		64	561428	37.9143	11.832	17.288	37.9143	CCN(CC)CCOc1cc(-c2nc(N)nc3sc(C(=O)NC4CC4)cc23)c(Cl)cc1Cl	CHEMBL561428	43.317
3482	3482	CHEMBL1871199	COc1ccc2c(c1)sc1nc(=O)ccn12	0	0	0	0	31.8355	26.0083	27.7359		1	3702849	31.8034	13.3645	19.2207		49	3715679	52.7712	18.4571	31.7922	52.7712	CC(C)(C)COc1ccc2c(c1)CCn1c-2cc(OC[C@@H]2COCCO2)nc1=O	CHEMBL3715679	64.3134		1	3951444	38.1345	12.0455	17.0981	38.1345	O=C(Nc1sc(-c2ccc(CN3CC(F)(F)C3)cc2)nc1-c1cc(Cl)ccc1OC(F)F)c1cnn2cccnc12	CHEMBL3951444	43.4934
3645	3645	CHEMBL4103155	COC(=O)C1=C(CN2CCOC[C@H]2CC(=O)O)NC(c2nccs2)=N[C@H]1c1ccc(F)cc1Cl	0	0	0	0	40.7438	13.1409	12.6725		1	3702846	31.7193	13.2982	19.1775		49	3715719	50.2783	17.5711	30.7468	50.2783	COc1ccccc1-c1ccc2c(c1)CCn1c-2cc(OCC2COCCO2)nc1=O	CHEMBL3715719	61.4981		64	4117642	41.0624	12.5395	18.3806	41.0624	CC(C)(C)[C@H](N)C(=O)Oc1ccccc1C(=O)Nc1ncc(Cl)s1	CHEMBL4117642	46.7034
3653	3653	CHEMBL4099383	CCOC(=O)C1=C(CN2CCOC[C@H]2C(=O)O)NC(c2nccs2)=N[C@H]1c1ccc(F)cc1C	0	0	0	0	41.4875	13.4082	12.7196		1	3702853	31.8133	13.3223	19.381		49	3715772	50.1361	17.5863	30.6081	50.1361	O=c1nc(OCC2CCCO2)cc2n1CCc1cc(OCCc3ccccc3)ccc1-2	CHEMBL3715772	61.3169		64	3890574	40.1263	12.4868	17.5209	40.1263	COc1cc2nc(NC(=O)CN3CCN(Cc4ccc(Cl)cc4)CC3)sc2cc1OC	CHEMBL3890574	45.5305
3967	3967	CHEMBL1312774	CCCCn1c(SC(C)C(=O)c2ccc(OC)cc2)nc2cc(S(N)(=O)=O)ccc21	0	0	0	0	27.4857	24.9688	20.3881		1	4093436	31.6679	13.2021	19.2578		49	3715804	51.708	18.0193	31.3208	51.708	CN(C)C(=O)COc1ccc2c(c1)CCn1c-2cc(OCC2CCCO2)nc1=O	CHEMBL3715804	63.0825		1	3966147	37.6024	11.891	16.8225	37.6024	CN1CCN(c2ccc(-c3nc(-c4cc(Cl)ccc4OC(F)F)c(NC(=O)c4cnn5cccnc45)s3)cc2)CC1	CHEMBL3966147	42.8758
3970	3970	CHEMBL528981	Cc1cc(NCCC(=O)NCCOc2ccccc2)nc(NCCc2ccc(F)cc2)n1.O=C(O)C(F)(F)F	0	0	0	0	29.4087	19.9612	21.0347		1	3890663	31.8034	13.3645	19.2207		49	3715817	51.4442	18.0107	31.2041	51.4442	O=c1nc(OC[C@@H]2COCCO2)cc2n1CCc1cc(COCC3CC3)ccc1-2	CHEMBL3715817	62.8059		1	4111910	37.0469	11.5718	17.0951	37.0469	CCOc1cc(C(=O)Nc2ncc(C)s2)ccc1-c1nc([C@@H]2CC[C@H]3CCC(=O)N3C2)n2c(Cl)cnc(N)c12	CHEMBL4111910	42.4102
4017	4017	CHEMBL4078512	COc1ccc(-c2cc(-c3cccs3)nc3nc4n(-c5ccc(S(N)(=O)=O)cc5)nc(C(C)=O)n4c(=O)c23)cc1	0	0	0	0	25.8317	24.6542	19.7367		1	3702837	31.6679	13.2021	19.2578		49	3715879	53.6232	18.7735	32.3638	53.6232	O=c1nc(OCC2COCCO2)cc2n1CCc1ccccc1-2	CHEMBL3715879	65.3858		1	4071556	34.6505	10.7322	16.0376	34.6505	O=C(Nc1ccc(Cl)cc1)n1ccc(CNc2nc3ccc(OCCN4CCOCC4)cc3s2)n1	CHEMBL4071556	39.6616
4131	4131	CHEMBL1355201	COc1ccc(-c2nc3cnc(Nc4cccc(OC)c4)nc3n(Cc3cccs3)c2=O)cc1	0	0	0	0	27.6146	21.1224	20.0221		1	3702848	31.8034	13.3645	19.2207		49	3715923	53.7961	18.8323	32.4084	53.7961	CC(C)(C)C#Cc1ccc2c(c1)CCn1c-2cc(OCC2COCCO2)nc1=O	CHEMBL3715923	65.5666		64	3694525	35.2073	10.8619	16.4817	35.2073	Cn1c(Nc2c(Cl)ccc(CNC(=O)C(C)(C)C)c2Cl)nc2cc(C(=O)Nc3nc4ccc(Cl)cc4s3)c(OCC(F)F)cc21	CHEMBL3694525	40.3631
4292	4292	CHEMBL1541341	COc1ccccc1CN(Cc1nc(O)c2ccccc2n1)C(=O)Nc1cccc(C)c1	0	0	0	0	36.4883	27.56	24.7398		1	3702839	32.0981	13.4782	19.4736		49	3716050	53.6784	18.8077	32.3766	53.6784	C#Cc1ccc2c(c1)CCn1c-2cc(OCC2COCCO2)nc1=O	CHEMBL3716050	65.4473		64	3667172	33.8739	10.3986	16.0555	33.8739	COc1ccc(-c2cn3c(C(=O)Nc4ccc(F)cc4F)csc3n2)cc1	CHEMBL2093809	38.9018
4747	4747	CHEMBL211853	COc1ccc(-n2nc(CN)c3ncn(-c4ccc(-c5ccccc5S(N)(=O)=O)cc4)c(=O)c32)cc1	1	0	0	0	24.9523	18.9397	18.2778		1	3931858	31.9578	13.4678	19.6534		49	3716060	50.5498	17.685	30.8841	50.5498	COc1ccc(-c2ccc3c(c2)CCn2c-3cc(OCC3CCCO3)nc2=O)cc1	CHEMBL3716060	61.8213		64	3586186	35.6108	11.4672	16.4608	35.6108	COc1ccccc1/C=C1/SC(N2CCC[C@H]2C(=O)Nc2ccc3ncnc(Nc4cccc(Cl)c4)c3c2)=NC1=O	CHEMBL3586186	40.8728
4846	4846	CHEMBL126787	CC(C)C1C(=O)N(S(C)(=O)=O)C2CCN(C(=O)c3csc(CN4CCCC4)n3)C12	0	0	0	0	4.06001	2.1114	15.046		1	3941568	32.0981	13.4782	19.4736		49	3716121	49.4575	17.2701	30.3521	49.4575	COc1cccc(C#Cc2ccc3c(c2)CCn2c-3cc(OCC3COCCO3)nc2=O)c1	CHEMBL3716121	60.5438		1	3425656	34.3415	11.1003	15.965	34.3415	COc1cc(N2CCN(C)CC2)ccc1Nc1ncc(Cl)c(Oc2cccc(NC(=O)/C(C#N)=C/c3ccc(SC)cc3)c2)n1	CHEMBL3425656	39.4644
4950	4950	CHEMBL1996967	COc1ccc(-c2c(-c3ccc(OC)cc3)n3c(=O)n(C)c(=O)n23)cc1	0	0	0	0	51.5511	34.2095	37.8917		1	416091	31.8561	13.5202	19.5676		49	3716123	50.9259	17.8087	30.8705	50.9259	O=c1nc(OC[C@@H]2COCCO2)cc2n1CCc1cc(OCC3COC3)ccc1-2	CHEMBL3716123	62.1577		64	1196119	40.5966	12.9747	17.7856	40.5966	COc1cc2nc(N3CCN(C(=O)/C=C/c4ccc(Cl)s4)CC3)nc(N)c2cc1OC	CHEMBL1196119	46.1818
4957	4957	CHEMBL186550	COc1cc2c(N3CCN(/C(S)=N\Cc4csc(C)n4)CC3)ncnc2cc1OCCCN1CCCCC1	0	0	3	0	34.5418	9.00997	29.0438		1	3702830	32.0334	13.4713	19.4769		49	3716125	48.6698	17.01	29.5191	48.6698	COc1ccccc1OCCOc1ccc2c(c1)CCn1c-2cc(OCC2CCCO2)nc1=O	CHEMBL3716125	59.4093		1	4072503	34.1408	10.4603	15.8375	34.1408	O=C(Nc1ccc(CNc2nc3ccc(OCCN4CCOCC4)cc3s2)cc1)Nc1cccc(Cl)c1	CHEMBL4072503	39.062
5038	5038	CHEMBL528802	Cc1cc(OCC(=O)Nc2ccc(-c3nc4ccccc4[nH]3)cc2)cc(C)c1Cl	0	0	0	0	43.8143	31.9012	23.4379		1	3912580	32.0111	13.4699	19.4534		49	3716166	48.9699	17.0783	29.5661	48.9699	CC(C)(C)OC(=O)COc1ccc2c(c1)CCn1c-2cc(OCC2COc3ccccc3O2)nc1=O	CHEMBL3716166	59.6982		1	3906961	36.5199	11.5194	16.5459	36.5199	CN(C)C1CCN(C(=O)C2CCN(c3nc(-c4cc(Cl)ccc4OC(F)F)c(NC(=O)c4cnn5cccnc45)s3)CC2)CC1	CHEMBL3906961	41.7153
5055	5055	CHEMBL224272	O=C(N[C@@H](Cc1ccc(O)cc1)c1cscn1)c1ccc2c(c1)nc(-c1ccoc1)n2C1CCCCC1	0	0	0	0	51.3465	16.1442	23.6809		1	3959434	32.4536	13.541	19.6168		49	3716184	51.1778	17.8638	31.1791	51.1778	COCCCCc1ccc2c(c1)CCn1c-2cc(OC[C@@H]2COCCO2)nc1=O	CHEMBL3716184	62.5333		64	3920687	36.7417	10.9433	16.4723	36.7417	CC(C)(C)CN1CCC2(CC1)CN(c1ccccc1NC(=O)Nc1ccc(OC(F)(F)F)cc1)c1c(O)ccc(-c3nc4c(Cl)cccc4s3)c12	CHEMBL3920687	41.7258
5079	5079	CHEMBL3609423	COc1ccc(C(=O)/C=C/c2cc(/C=N/c3nc(-c4ccc(OC)c(OC)c4)cs3)c(O)c(C(C)(C)C)c2)cc1	0	0	0	0	52.2034	15.6844	27.4122		1	3702834	32.0579	13.4302	19.3626		49	3716185	53.5376	18.7485	32.2235	53.5376	COc1ccc2c(c1)CCn1c-2cc(OCC2CCCCO2)nc1=O	CHEMBL3716185	65.2391		1	3921881	36.4844	11.4756	16.7646	36.4844	CN(C)C1CCN(C(=O)c2ccc(-c3nc(-c4cc(Cl)ccc4OC(F)F)c(NC(=O)c4cnn5cccnc45)s3)cc2)CC1	CHEMBL3921881	41.7595
5209	5209	CHEMBL1366273	Cc1cccn2c(=O)c(/C=C(\C#N)c3nc4ccccc4s3)c(Oc3ccc(Br)cc3)nc12	0	0	0	0	32.6801	26.698	28.4904		1	295528	32.3815	13.7033	19.611		49	3716251	49.3794	17.23	30.2005	49.3794	COc1ccc(COc2ccc3c(c2)CCn2c-3cc(OCC3CCCO3)nc2=O)cc1	CHEMBL3716251	60.3926		64	3952492	36.9147	10.9576	16.5451	36.9147	CC(C)N1CCC2(CC1)CN(c1ccccc1NC(=O)Nc1ccc(OC(F)(F)F)cc1)c1c(O)ccc(-c3nc4cc(Cl)ccc4s3)c12	CHEMBL3952492	41.9107
5241	5241	CHEMBL1527655	CCOc1ccc(-n2c(-c3cccs3)nc3ccccc3c2=O)cc1	0	0	0	0	32.3766	26.0859	28.8138		1	3979968	32.1617	13.5125	19.5189		49	3716270	49.24	17.2241	30.0704	49.24	N#Cc1cccc(COc2ccc3c(c2)CCn2c-3cc(OCC3CCCO3)nc2=O)c1	CHEMBL3716270	60.2119		1	1082831	37.8151	11.9116	16.8585	37.8151	COc1ccc(-c2nc3c(N4CCN(CC(=O)Nc5nccs5)CC4)c(Cl)cnc3[nH]2)cc1	CHEMBL1082831	43.0822
5338	5338	CHEMBL1576963	O=C(COc1ccccc1)NCc1nnc2c3ccccc3c(-c3ccccc3)nn12	0	0	0	0	51.5113	35.8052	31.1006		1	3702859	32.0823	13.4395	19.4044		49	3716433	50.1873	17.4847	30.6503	50.1873	CCOCCOCC#Cc1ccc2c(c1)CCn1c-2cc(OC[C@@H]2COCCO2)nc1=O	CHEMBL3716433	61.3508		1	4288374	33.4218	10.4853	15.431	33.4218	O=C(NCCN1CCOCC1)Nc1ccc(-c2cc3c(Nc4ccc(Oc5cccc(C(F)(F)F)c5)c(Cl)c4)ncnc3s2)cc1	CHEMBL4288374	38.2763
5389	5389	CHEMBL555131	CS(=O)(=O)c1ccc(Oc2cc(O[C@@H]3CCC[C@@H]3O)cc(C(=O)Nc3nccs3)c2)cc1	0	0	0	0	17.7681	17.6288	15.9738		1	3702847	32.1567	13.4915	19.4556		49	3716482	49.1665	17.1809	30.09	49.1665	N#Cc1ccc(COc2ccc3c(c2)CCn2c-3cc(OCC3CCCO3)nc2=O)cc1	CHEMBL3716482	60.1493		64	605158	40.6576	12.8752	18.0572	40.6576	Nc1nc(N2CCN(C(=O)COc3ccc(Cl)cc3)CC2)c2cc(F)sc2n1	CHEMBL605158	46.3128
5479	5479	CHEMBL3953986	Cc1ccc(OCc2cc(C)c3c(c2C)CCN(C2COC2)C3)c(-c2csc(N3CC[C@@]4(C(=O)O)C[C@H]4C3)n2)c1	0	0	0	0	25.0035	7.80288	19.5017		1	417006	32.4482	13.7067	19.5973		49	3716527	51.2908	17.9235	31.1151	51.2908	O=c1nc(OC[C@@H]2COCCO2)cc2n1CCc1cc(COCC3CCCC3)ccc1-2	CHEMBL3716527	62.6111		64	365719	38.4585	11.8935	17.497	38.4585	Cc1nc2cc(OC[C@H](O)CN3CCN(Cc4noc(-c5ccc(Cl)c(Cl)c5)n4)CC3)ccc2s1	CHEMBL365719	43.8937
5498	5498	CHEMBL4107934	CO[C@H]1CN(c2nc(-c3cc(C)ccc3OCc3cc(C)c4c(c3C)CCN(C3CCOCC3)C4)cs2)CC[C@H]1C(=O)O	0	0	0	0	27.5264	8.16029	20.9128		1	3702851	32.1617	13.5125	19.5189		49	3716528	51.0655	17.8398	31.0157	51.0655	COC(CCc1ccc2c(c1)CCn1c-2cc(OC[C@@H]2COCCO2)nc1=O)C(C)C	CHEMBL3716528	62.3532		1	1209018	34.1144	10.6997	16.2473	34.1144	CCN1CCN(CCCn2cc(-c3ccc4c(c3)ncn4-c3cc(O[C@H](C)c4ccccc4Cl)c(C(N)=O)s3)cn2)CC1	CHEMBL1209018	39.2715
5579	5579	CHEMBL4063800	CCOc1ccc2c(c1)sc1nc(C(=O)NCc3cn(Cc4cc(OC)c(OC)c(OC)c4)nn3)cn12	0	0	0	0	45.5341	37.7074	31.3368		1	4114701	32.4127	13.5596	19.5806		49	3716619	52.2937	18.2595	31.5878	52.2937	CC(C)(C)CCCOc1ccc2c(c1)CCn1c-2cc(OC[C@@H]2COCCO2)nc1=O	CHEMBL3716619	63.7639		64	580600	36.5586	11.425	16.9115	36.5586	CCNC[C@H]1CCCN1CCOc1ccc(-n2cnc3cc(-c4ccc(Cl)cc4)sc3c2=O)cc1OC	CHEMBL580600	41.8696
5637	5637	CHEMBL1327657	Cc1csc(SC(C)C(=O)NCC2CCCO2)n1	0	0	0	0	8.47402	2.31254	3.42616		1	3965958	32.088	13.4768	19.5021		49	3716722	50.0251	17.4419	30.7452	50.0251	COc1ccc(-c2ccc3c(c2)CCn2c-3cc(OCC3COCCO3)nc2=O)c(OC)n1	CHEMBL3716722	61.2536		1	3983975	38.9091	12.2921	17.3837	38.9091	O=C(Nc1sc(N2CCC(N3CC(F)(F)C3)CC2)nc1-c1cc(Cl)ccc1OC(F)F)c1cnn2cccnc12	CHEMBL3983975	44.3532
5666	5666	CHEMBL225959	COc1cc(C(=O)Nc2ncc(C)s2)cc(OC)c1OC	0	0	0	0	32.8656	31.1575	27.1453		1	3890002	31.862	13.4132	19.3455		49	3716734	49.3053	17.2352	30.1102	49.3053	N#Cc1ccccc1COc1ccc2c(c1)CCn1c-2cc(OCC2CCCO2)nc1=O	CHEMBL3716734	60.2884		64	1709970	39.3893	12.1447	17.3819	39.3893	Cc1ccc(C(C)C)c(OCC(=O)N/N=C/c2sc(Nc3ccccc3)nc2Cl)c1	CHEMBL1709970	44.7341
6228	6228	CHEMBL1271091	O=C(CSc1nc2ccc(Nc3nc(N4CCCC4)nc(N4CCCC4)n3)cc2s1)NCc1ccco1	1	0	0	0	35.9413	11.0147	17.5787		1	3892680	32.4127	13.5596	19.5806		49	3716761	48.9002	17.1188	29.6783	48.9002	O=c1nc(OCC2COc3ccccc3O2)cc2n1CCc1cc(OCC3CCCO3)ccc1-2	CHEMBL3716761	59.7083		64	3323399	40.017	12.3515	17.7636	40.017	COc1ccc(Cl)cc1Nc1nc2c(s1)CCCc1nc(NC(=O)C3CC3)sc1-2	CHEMBL3323399	45.4914
6298	6298	CHEMBL258240	Cn1ccnc1-c1cc2nccc(Oc3ccc(NC(=S)NC(=O)Cc4ccccc4)cc3F)c2s1	0	0	3	0	26.9497	20.093	19.6628		1	3702840	32.088	13.4768	19.5021		49	3716857	51.4654	17.9916	31.2052	51.4654	COC(C#Cc1ccc2c(c1)CCn1c-2cc(OCC2COCCO2)nc1=O)C(C)C	CHEMBL3716857	62.8184		1	3907485	38.3234	12.0829	17.1713	38.3234	COc1ccccc1CCNc1nc(C)cc(N[C@@H](CC(C)C)C(=O)NCc2cccs2)n1	CHEMBL586336	43.6982
6593	6593	CHEMBL3957005	CO[C@@H]1CN(c2nc(-c3cccc(C)c3OCc3cc(F)c4c(c3)CCN(C3CCOCC3)CC4)cs2)CC[C@@H]1C(=O)O	0	0	0	0	27.6502	8.2112	21.0477		1	3903174	32.1567	13.4915	19.4556		49	3716889	51.0411	17.8399	30.9334	51.0411	O=c1nc(OC[C@@H]2COCCO2)cc2n1CCc1cc(OCC3CCCCO3)ccc1-2	CHEMBL3716889	62.2923		1	497803	38.5628	12.1899	16.9516	38.5628	COC(=O)N1CCC[C@@H]1C#Cc1cc2ncnc(Nc3ccc(OCc4cccc(F)c4)c(Cl)c3)c2s1	CHEMBL497803	43.8525
6597	6597	CHEMBL3927881	CCO[C@@H]1CN(c2nc(-c3cccc(C)c3OCc3cc(OC)c4c(c3F)CCN(C3CCOCC3)C4)cs2)CC[C@@H]1C(=O)O	0	0	0	0	27.6825	8.19169	20.947		1	3702857	32.1912	13.5198	19.5838		49	3716913	50.6297	17.7434	30.8838	50.6297	N#Cc1ccccc1-c1ccc2c(c1)CCn1c-2cc(OCC2CCCO2)nc1=O	CHEMBL3716913	61.9032		64	2377285	34.9569	10.9228	16.2654	34.9569	COc1cc2c(Nc3nc4ccc(C(=O)Nc5c(C)cccc5Cl)cc4s3)ncnc2cc1OCCCN1CCC(C)CC1	CHEMBL2377285	40.0731
6734	6734	CHEMBL1986400	COc1ccccc1Cc1nc(-c2ccccc2)nn(C2OC(COC(C)=O)C(OC(C)=O)C(OC(C)=O)C2OC(C)=O)c1=S	0	0	0	0	52.8384	16.3651	31.7903		1	3702856	31.862	13.4132	19.3455		49	3717000	53.6566	18.794	32.3979	53.6566	COc1ccc2c(c1)CCn1c-2cc(OCC2CCCO2)nc1=O	CHEMBL3717000	65.436		64	1652671	39.5504	12.4549	17.6201	39.5504	Nc1nc(N2CCN(C(=O)COc3ccc(Cl)cc3)CC2)c2nc(CCCc3ccc(F)cc3)sc2n1	CHEMBL1652671	45.0536
6885	6885	CHEMBL1257592	CCSc1nnc2c(n1)O[C@@H](c1cccc(OC)c1)N(C(=O)CC)c1ccccc1-2	0	0	0	0	51.6729	38.3797	39.5161		1	3702843	32.5206	13.6312	19.6417		49	3717001	50.1313	17.449	30.6065	50.1313	CC1(COCc2ccc3c(c2)CCn2c-3cc(OC[C@@H]3COCCO3)nc2=O)COC1	CHEMBL3717001	61.2729		1	3952022	40.3443	12.7964	17.7396	40.3443	CN1CCN(c2nc(-c3cc(Cl)ccc3OC(F)F)c(NC(=O)c3cnn4cccnc34)s2)CC1	CHEMBL3952022	45.8923
6907	6907	CHEMBL4071244	CCN(CC)c1ccc(/C=N/NC(=O)Nc2cc3c(Nc4ccc(F)c(Cl)c4)ncnc3cc2O[C@H]2CCOC2)c(O)c1	0	0	0	0	33.2749	14.523	16.5259		1	3918024	32.1912	13.5198	19.5838		49	3717016	50.7181	17.7176	30.8456	50.7181	O=c1nc(OC[C@@H]2COCCO2)cc2n1CCc1cc(COC3COC3)ccc1-2	CHEMBL3717016	61.9491		1	3897943	37.1329	11.7231	16.774	37.1329	CN(CC1(C#N)CCCCC1)C1CCN(c2nc(-c3cc(Cl)ccc3OC(F)F)c(NC(=O)c3cnn4cccnc34)s2)CC1	CHEMBL3897943	42.3987
6911	6911	CHEMBL4089661	O=C(N/N=C/c1ccc(O)c(Br)c1)Nc1cc2c(Nc3ccc(F)c(Cl)c3)ncnc2cc1O[C@H]1CCOC1	0	0	0	0	33.3396	14.6033	16.571		1	3952977	32.0334	13.4713	19.4769		49	3717024	52.7863	18.5657	32.0216	52.7863	Cc1cccc(C)c1-c1ccc2c(c1)CCn1c-2cc(OCC2CCCO2)nc1=O	CHEMBL3717024	64.4706		1	3958770	38.0993	12.038	17.0428	38.0993	CN(CCC#N)C1CCN(c2nc(-c3cc(Cl)ccc3OC(F)F)c(NC(=O)c3cnn4cccnc34)s2)CC1	CHEMBL3958770	43.4388
7073	7073	CHEMBL1374510	COc1ccc(NC(=O)Cn2c(=O)n(-c3ccc(OC)cc3)c(=O)c3sc4ccccc4c32)cc1	0	0	0	0	34.9658	28.5508	23.711		1	3702855	32.0111	13.4699	19.4534		49	3717070	51.8382	18.2784	31.5154	51.8382	O=c1nc(OCC2CCCO2)cc2n1CCc1cc(-c3cccc4ccccc34)ccc1-2	CHEMBL3717070	63.3602		1	466174	35.3469	11.042	16.1621	35.3469	CCNC(=O)O[C@H]1CN[C@H](C#Cc2cc3ncnc(Nc4ccc(OCc5cccc(F)c5)c(Cl)c4)c3s2)C1	CHEMBL512076	40.4047
7088	7088	CHEMBL1558398	COc1ccc(-c2[nH]c(-c3ccc(C)cc3)nc2SCC(=O)Nc2nccs2)cc1	0	0	0	0	34.1664	29.9421	24.4655		1	4114774	32.4753	13.6145	19.7025		49	3716099	50.8899	17.7984	30.8294	50.8899	CC(C)OCCOc1ccc2c(c1)CCn1c-2cc(OC[C@@H]2COCCO2)nc1=O	CHEMBL3717086	62.1049		64	4089768	41.0604	12.5357	18.3936	41.0604	CC(C)(C)[C@H](N)C(=O)Oc1ccccc1C(=O)Nc1ncc(Cl)s1.Cl	CHEMBL4089768	46.7057
7113	7113	CHEMBL4064776	O=C(N/N=C/c1ccc(O)cc1)Nc1cc2c(Nc3ccc(F)c(Cl)c3)ncnc2cc1O[C@H]1CCOC1	0	0	3	0	33.3156	14.5724	16.5505		1	3702828	33.2229	13.9373	19.745		49	3717237	53.6171	18.8045	32.3614	53.6171	CCCCOc1ccc2c(c1)CCn1c-2cc(OCC2CCCO2)nc1=O	CHEMBL3717237	65.3886		64	2377289	34.1805	10.6644	16.0597	34.1805	COc1cc2c(Nc3nc4ccc(C(=O)Nc5c(C)cccc5Cl)cc4s3)ncnc2cc1OCCCN1CCOCC1	CHEMBL2377289	39.2422
7228	7228	CHEMBL1579878	Cc1cnc(NC(=O)C2COc3ccccc3O2)s1	0	0	0	0	33.3126	31.4531	25.9139		1	3950862	33.2229	13.9373	19.745		49	3717251	50.2609	17.5498	30.3523	50.2609	COc1cccc(-c2ccc3c(c2)CCn2c-3cc(OCC3COCCO3)nc2=O)c1OC	CHEMBL3717251	61.2814		1	505463	34.3074	10.7781	15.8287	34.3074	O=C(O[C@H]1CN[C@H](C#Cc2cc3ncnc(Nc4ccc(Oc5ccnc6ccc(F)cc56)c(Cl)c4)c3s2)C1)N1CCOCC1	CHEMBL505463	39.2901
7253	7253	CHEMBL557735	Cc1cc(CNC(C)(C)C)ccc1[C@@H](C)Oc1cc(-c2cnc3ccccn23)sc1C(N)=O	0	0	3	0	37.3405	11.4616	19.4875		1	295601	32.6991	13.8261	19.6648		49	3717326	48.863	17.0484	29.6139	48.863	CC(C)N(C)C(=O)COc1ccc2c(c1)CCn1c-2cc(OCC2COc3ccccc3O2)nc1=O	CHEMBL3717326	59.6257		64	3921046	36.7454	11.5388	16.8523	36.7454	COc1cc(-n2cnc3cc(-c4ccc(Cl)cc4)sc3c2=O)ccc1OCC1(OC(=O)CN)CCC1	CHEMBL3921046	42.0401
7598	7598	CHEMBL2021551	CC[C@H](COC)Oc1cc(Oc2ccc(S(=O)(=O)OC)cc2)cc(C(=O)Nc2nccs2)c1	0	0	0	0	28.988	28.3036	21.6818		1	4114762	32.7826	13.854	19.7148		49	3717363	53.3347	18.7116	32.1249	53.3347	O=c1nc(OC[C@H]2COCCO2)cc2n1CCc1cc(C#CC3CC3)ccc1-2	CHEMBL3717363	65.0133		1	4080475	34.1372	10.4557	15.8389	34.1372	O=C(Nc1ccc(Cl)cc1)Nc1ccc(CNc2nc3ccc(OCCN4CCOCC4)cc3s2)cc1	CHEMBL4080475	39.0582
7630	7630	CHEMBL555974	COc1cc2nc(N3CCN(C(=O)/C=C/c4ccc(Cl)s4)CC3)nc(N)c2cc1OC.Cl	0	0	0	0	40.5705	12.9632	17.7816		1	3702831	33.089	13.8282	19.7258		49	3717561	51.2219	17.9081	31.0492	51.2219	CCOCCOc1ccc2c(c1)CCn1c-2cc(OC[C@@H]2COCCO2)nc1=O	CHEMBL3717561	62.5175		64	227486	35.6609	10.7454	16.9138	35.6609	O=C(CCC(=O)Nc1nc(-c2cc3cc(Cl)ccc3oc2=O)cs1)NCCCN1CCCC1	CHEMBL227486	40.9053
7724	7724	CHEMBL401192	CC(=O)Nc1nc2c(Oc3cc(-c4ccc(C(F)(F)F)cc4)nc(NCC4CCCN(CC(C)C)C4)n3)cccc2s1	0	0	0	0	36.254	10.7765	20.0412		1	3949568	32.7826	13.854	19.7148		49	3717594	49.569	17.4215	30.347	49.569	O=c1nc(OCC2CCCO2)cc2n1CCc1cc(OCc3ccc4ccccc4c3)ccc1-2	CHEMBL3717594	60.6757		64	3987098	36.8395	11.3236	17.1874	36.8395	Cc1oc2c(c1CC(=O)/N=c1\scc(-c3ccc(OC(F)(F)F)c(Cl)c3)n1COC(=O)[C@@H](N)C(C)C)c(=O)n(C)c(=O)n2C	CHEMBL3987098	42.1993
8342	8342	CHEMBL446455	CC(=O)Nc1nc2c(Oc3cc(-c4ccc(C(F)(F)F)cc4)nc(NCc4ccncc4)n3)cccc2s1	0	0	0	0	27.2036	20.2206	20.3067		1	3915538	32.5829	13.6707	19.7986		49	3717600	51.2109	17.89	31.0945	51.2109	O=c1nc(OC[C@@H]2COCCO2)cc2n1CCc1cc(COC3CCCCC3)ccc1-2	CHEMBL3717600	62.5258		64	81337	41.3612	12.7958	18.2561	41.3612	CC(C)C(=O)N1CCC(CNc2nc3c(s2)CCOc2cc(Cl)c(F)cc2-3)CC1	CHEMBL81337	46.9869
8428	8428	CHEMBL525804	CC(=O)Nc1nc2c(Oc3cc(-c4ccc(C(F)(F)F)cc4NC(C)c4ccccn4)ncn3)cccc2s1	0	0	0	0	26.9294	19.8736	20.0041		1	47787	32.6179	13.7351	20.0444		49	3717786	50.5574	17.7092	30.8506	50.5574	Cc1ccc(COc2ccc3c(c2)CCn2c-3cc(OCC3CCCO3)nc2=O)cc1	CHEMBL3717786	61.8177		64	1904574	37.2103	11.6474	17.0165	37.2103	CC(Oc1cc(-n2cnc3ccc(OCC4CCN(C)CC4)cc32)sc1C(N)=O)c1ccccc1Cl	CHEMBL1904574	42.5421
8499	8499	CHEMBL3196043	COc1cccc(/C=N/NC(=O)C(C)Cn2cnc3ccccc32)c1	0	0	0	0	49.661	34.3902	29.8401		1	45651	32.6077	13.7314	20.0306		49	3717790	50.8802	17.7695	30.8774	50.8802	O=c1nc(OC[C@@H]2COCCO2)cc2n1CCc1cc(OCC3CCOCC3)ccc1-2	CHEMBL3717790	62.1125		1	3959420	39.3409	12.4643	17.4804	39.3409	O=C(Nc1sc(N2CCN(CC3CC3)CC2)nc1-c1cc(Cl)ccc1OC(F)F)c1cnn2cccnc12	CHEMBL3959420	44.8177
8734	8734	CHEMBL3493850	c1coc(-c2nc(CN3CCn4c(nnc4C4CC4)C3)cs2)c1	0	0	0	0	41.0106	11.6942	27.4195		1	3651263	32.1602	13.6892	19.8979		49	3717795	53.9025	18.9008	32.5106	53.9025	CCCCC#Cc1ccc2c(c1)CCn1c-2cc(OCC2COCCO2)nc1=O	CHEMBL3717795	65.7241		1	507862	35.1667	11.3568	16.0526	35.1667	CCC(=O)C1CCN(CCCOc2cc3ncc(C#N)c(Nc4ccc(Sc5nc(C)c(C)n5CC)c(Cl)c4)c3cc2OC)CC1	CHEMBL507862	40.2909
8772	8772	CHEMBL1165698	COc1ccc(-c2cc(-c3ccc(F)cc3)nc(NC(=O)N/N=C\c3ccccc3Cl)n2)c(OC)c1	0	0	0	0	52.8221	37.6515	26.5164		1	3894102	31.9212	13.4832	19.8004		49	3717924	51.3937	17.952	31.2739	51.3937	COCCCc1ccc2c(c1)CCn1c-2cc(OC[C@H]2COCCO2)nc1=O	CHEMBL3717924	62.7825		64	3694532	35.9015	11.1154	16.6172	35.9015	Cn1c(Nc2c(Cl)ccc(CNC(=O)C(C)(C)C)c2Cl)nc2cc(C(=O)Nc3ncc(Cl)s3)c(OCC(F)F)cc21	CHEMBL3694532	41.0926
9081	9081	CHEMBL4127986	COc1ccccc1-c1nc(SC(C(N)=O)c2nc(-c3cccc([N+](=O)[O-])c3)cs2)[nH]c(=O)c1C#N	1	0	0	0	33.6142	16.6699	20.1104		1	3701246	32.6209	13.5693	19.8222		49	3717963	49.946	17.426	30.5651	49.946	COc1ccc(OC)c(-c2ccc3c(c2)CCn2c-3cc(OCC3COCCO3)nc2=O)c1	CHEMBL3717963	61.0941		64	3586188	35.3577	11.3804	16.38	35.3577	COc1ccc(/C=C2/SC(N3CCC[C@H]3C(=O)Nc3ccc4ncnc(Nc5cccc(Cl)c5)c4c3)=NC2=O)cc1	CHEMBL3586188	40.5954
9269	9269	CHEMBL1357858	CCOc1ccc(CCNC(=O)Cn2nc(CC)n3c(cc4sc(CC)cc43)c2=O)cc1OCC	0	0	0	0	47.1824	38.3689	31.9568		1	3968716	32.595	13.6896	19.9577		49	3718208	55.0997	19.337	33.2953	55.0997	CC(C)(C)C#Cc1ccc2c(c1)CCn1c-2cc(OCC2CCCO2)nc1=O	CHEMBL3718208	67.2196		18	262627	40.6496	12.5541	17.9072	40.6496	COc1ccc(Cl)cc1Nc1nc(-c2sc(NC(=O)C(C)(C)C)nc2C)cs1	CHEMBL262627	46.1591
9418	9418	CHEMBL1367184	COc1ccc(CCNC(=O)CSc2nc3nc(C)c(Cc4ccc(C)cc4)c(C)n3n2)cc1OC	0	0	0	0	49.1974	38.0098	32.1124		1	3604939	32.5761	13.9552	19.7608		49	3718288	51.6823	18.0787	31.3524	51.6823	O=c1nc(OCC2COCCO2)cc2n1CCc1cc(C3=CCOCC3)ccc1-2	CHEMBL3718288	63.0942		1	1794070	37.6533	11.8199	17.1184	37.6533	CC(Oc1cc(-n2cnc3ccc(OC4CCN(C)CC4)cc32)sc1C(N)=O)c1ccccc1Cl	CHEMBL1876487	43.0177
9458	9458	CHEMBL1973581	COc1cc(/C=C/C(=N\NC(=S)NN)c2sc(NNC(C)=O)nc2C)ccc1O	0	0	0	0	41.9585	36.9755	29.4187		1	3982014	32.6191	13.716	19.9832		49	3718308	50.4263	17.6565	30.8463	50.4263	CN(C)c1ccc(-c2ccc3c(c2)CCn2c-3cc(OCC3CCCO3)nc2=O)cc1	CHEMBL3718308	61.6933		1	461426	35.4216	11.0662	16.1964	35.4216	NC(=O)O[C@H]1CN[C@H](C#Cc2cc3ncnc(Nc4ccc(OCc5cccc(F)c5)c(Cl)c4)c3s2)C1	CHEMBL461426	40.4904
9895	9895	CHEMBL1916154	CCC1C2CCC(C2)C1NC(=O)CSc1nc2ccccc2c2nc(=O)c(-c3ccc(OC)cc3)nn12	0	0	0	0	53.3108	17.2677	25.5741		1	3902180	32.595	13.6896	19.9577		49	3718406	53.633	18.8209	32.3588	53.633	O=c1nc(OCC2CCCO2)cc2n1CCc1cc(OCC3CC3)ccc1-2	CHEMBL3718406	65.405		64	586713	39.2953	12.5914	17.4187	39.2953	COc1cc2nc(N3CCN(C(=O)c4c(Cl)nsc4-c4ccccc4Cl)CC3)nc(N)c2cc1OC	CHEMBL586713	44.7892
9916	9916	CHEMBL1602491	COc1ccc(-c2csc3ncn(-c4ccc(C)cc4)c(=O)c23)cc1OC	0	0	0	0	32.5803	26.189	27.0602		1	4110614	32.595	13.6896	19.9577		49	3718413	52.5444	18.4166	31.6833	52.5444	C=CCOc1ccc2c(c1)CCn1c-2cc(OC[C@@H]2COCCO2)nc1=O	CHEMBL3718413	64.0618		64	186976	38.4772	11.8855	17.4899	38.4772	Cc1nc2cc(OC[C@H](O)CN3CCN(Cc4noc(-c5ccc(Cl)cc5Cl)n4)CC3)ccc2s1	CHEMBL186976	43.9051
9953	9953	CHEMBL1981681	COc1ccc2nc(-n3c(/C=C/c4ccccc4O)nc4ccccc4c3=O)sc2c1	0	0	0	0	34.2974	28.0227	23.382		1	4114718	32.9016	13.7386	19.8464		49	3718436	52.7078	18.4442	31.7977	52.7078	COc1ccc2c(c1)CCn1c-2cc(OCC2COCCO2)nc1=O	CHEMBL3718436	64.2604		1	495734	38.4948	12.1627	17.0194	38.4948	CC(=O)N1CCC[C@@H]1C#Cc1cc2ncnc(Nc3ccc(OCc4cccc(F)c4)c(Cl)c3)c2s1	CHEMBL495734	43.8114
10038	10038	CHEMBL1514971	COc1ccc(-c2csc(N(CCCN(C)C)C(=O)c3ccccc3Cl)n2)cc1.Cl	0	0	0	0	27.9399	20.0064	27.3581		1	3702829	33.182	13.9798	19.8674		49	3718497	53.1737	18.6458	32.037	53.1737	O=c1nc(OCC2COCCO2)cc2n1CCc1cc(C#CC3CCCC3)ccc1-2	CHEMBL3718497	64.8188		1	199725	31.7233	10.2283	15.203	31.7233	COc1cc2c(Nc3ccc(Cl)cc3F)ncnc2cc1OCCOCCNC(=O)CCCCC1SCC2NC(=O)NC21	CHEMBL199725	36.6349
10104	10104	CHEMBL522726	CC(=O)Nc1nc2c(Oc3cc(-c4ccc(C(F)(F)F)cc4NC(=O)CCN(C)C)ncn3)cccc2s1	0	0	0	0	26.5297	19.4653	19.7274		1	4114772	33.1244	13.9404	19.7843		49	3718543	48.9037	17.1208	29.99	48.9037	O=c1nc(OCC2CCCO2)cc2n1CCc1cc(OCCOCc3ccccc3)ccc1-2	CHEMBL3718543	59.8673		49	393842	38.2364	11.6452	17.2592	38.2364	CC(C)[C@H]1NC(=O)[C@@H](Cc2cccc(Cl)c2)NCCOc2ccccc2CCCNC(=O)[C@H](CNc2nccs2)NC1=O	CHEMBL393842	43.5375
10174	10174	CHEMBL499990	CC(=O)Nc1nc2c(Oc3cc(-c4ccc(C(F)(F)F)cc4NC[C@H]4CCCN4CC(C)C)ncn3)cccc2s1	0	0	0	0	35.7305	10.6268	19.7872		1	3930024	32.7661	14.0339	20.2141		49	3718569	54.703	19.2342	33.008	54.703	O=c1nc(OCC2CCCO2)cc2n1CCc1cc(C#CC3CC3)ccc1-2	CHEMBL3718569	66.7226		64	1869789	35.3469	11.042	16.1621	35.3469	CCNC(=O)O[C@H]1CN[C@H](C#Cc2cc3ncnc(Nc4ccc(OCc5cccc(F)c5)c(Cl)c4)c3s2)C1	CHEMBL512076	40.4047
10178	10178	CHEMBL505463	O=C(O[C@H]1CN[C@H](C#Cc2cc3ncnc(Nc4ccc(Oc5ccnc6ccc(F)cc56)c(Cl)c4)c3s2)C1)N1CCOCC1	0	0	3	0	34.3074	10.7781	15.8287		1	3893004	33.2488	13.9997	20.0225		49	3718615	50.3035	17.6125	30.76	50.3035	N#Cc1cccc(-c2ccc3c(c2)CCn2c-3cc(OCC3CCCO3)nc2=O)c1	CHEMBL3718615	61.5371		1	3921926	39.5741	12.5208	17.5245	39.5741	CN(C)C1CCN(c2nc(-c3cc(Cl)ccc3OC(F)F)c(NC(=O)c3cnn4cccnc34)s2)CC1	CHEMBL3921926	45.0554
10241	10241	CHEMBL1539086	COc1cc(CNc2ccc3[nH]c(O)nc3c2)cc(Cl)c1OCC(=O)NC(C)(C)C	0	0	0	0	33.2874	12.9262	15.9689		1	3889694	33.2488	13.9997	20.0225		49	3718616	50.6745	17.751	30.9493	50.6745	COc1cccc(-c2ccc3c(c2)CCn2c-3cc(OCC3CCCO3)nc2=O)c1	CHEMBL3718616	61.9747		1	3890152	37.8464	11.9049	17.0984	37.8464	CN1C[C@H]2CN(C(=O)c3nc(-c4cc(Cl)ccc4OC(F)F)c(NC(=O)c4cnn5cccnc45)s3)C[C@H]2C1	CHEMBL3890152	43.2022
10257	10257	CHEMBL1164035	COc1ccc(-c2cc(-c3ccc(F)cc3)nc(NC(=O)N/N=C\c3ccccc3[N+](=O)[O-])n2)c(OC)c1	0	0	0	0	34.1568	16.4816	20.5404		1	3823711	33.4126	13.9992	20.4495		49	3718620	48.5363	16.9253	29.4023	48.5363	O=C(COc1ccc2c(c1)CCn1c-2cc(OCC2COc3ccccc3O2)nc1=O)N1CCOCC1	CHEMBL3718620	59.2177		1	1964264	37.6763	11.8096	17.1287	37.6763	C[C@@H](Oc1cc(-n2cnc3ccc(O[C@@H]4CCCN(C)CC4)cc32)sc1C(N)=O)c1ccccc1Cl	CHEMBL1964265	43.0391
10373	10373	CHEMBL1578787	COc1ccc(-n2c(SCC(N)=O)nc3sc4c(c3c2=O)CCC4)cc1	0	0	0	0	33.7884	27.0793	23.0244		1	3980550	33.2488	13.9997	20.0225		49	3718652	52.7395	18.5569	31.9901	52.7395	O=c1nc(OCC2CCCO2)cc2n1CCc1cc(-c3ccccc3)ccc1-2	CHEMBL3718652	64.4141		64	1652674	40.1242	12.6608	17.7551	40.1242	Cc1ccc(-c2nc3c(N4CCN(C(=O)COc5ccc(Cl)cc5)CC4)nc(N)nc3s2)cc1	CHEMBL1652674	45.6672
10630	10630	CHEMBL4167950	COc1cc(Cn2cnc3c(Cl)ncnc32)cc(OC)c1OC	0	0	0	0	40.1378	27.373	36.0131		1	231251	32.9087	14.0179	20.2596		49	3714950	55.0005	19.3213	32.9704	55.0005	CC(C)[C@H]1CC(COc2cc3n(c(=O)n2)CCc2cc(C#CC4CC4)ccc2-3)O1	CHEMBL3718653	66.9732		1	507329	34.9319	10.9579	16.0895	34.9319	O=C(OC1CNC(C#Cc2cc3ncnc(Nc4ccc(OCc5cccc(F)c5)c(Cl)c4)c3s2)C1)N1CCOCC1	CHEMBL1885298	39.9898
11173	11173	CHEMBL1324488	COCCCn1c(=O)c2sccc2n2c(CCCC(=O)NCc3ccccc3OC)nnc12	0	0	0	0	46.9333	38.4589	29.1353		1	4114726	32.932	13.7452	19.8028		49	3718665	52.1088	18.2403	31.5643	52.1088	O=c1nc(OCC2CCCO2)cc2n1CCc1cc(OCC3CCCO3)ccc1-2	CHEMBL3718665	63.5951		1	450109	34.9319	10.9579	16.0895	34.9319	O=C(OC1CNC(C#Cc2cc3ncnc(Nc4ccc(OCc5cccc(F)c5)c(Cl)c4)c3s2)C1)N1CCOCC1	CHEMBL1885298	39.9898
11187	11187	CHEMBL1697896	COc1ccc(NC(=O)CSc2nc(C3CC3)nc3ccccc23)cc1	0	0	0	0	56.5556	18.3316	26.9516		1	3980841	32.8424	13.6971	19.7512		49	3718668	50.5881	17.7324	30.8092	50.5881	O=c1nc(OCC2CCCO2)cc2n1CCc1cc(OCc3ccccc3)ccc1-2	CHEMBL3718668	61.8288		64	581307	35.3283	11.1274	16.2972	35.3283	COc1cc(-n2cnc3cc(-c4ccc(Cl)cc4)sc3c2=O)ccc1OCCN1CCC(c2cccc(NC(C)=O)c2)CC1	CHEMBL581307	40.4661
11208	11208	CHEMBL1094443	COc1ccccc1C1C2=C(N=c3s/c(=C\c4cccc(OCC(=O)O)c4)c(=O)n31)c1ccccc1C(OC)C2	0	0	0	0	38.1121	35.5313	20.7786		1	3902317	33.5558	14.0453	19.9659		49	3718686	51.5521	17.9819	31.2275	51.5521	CCN(CC)C(=O)COc1ccc2c(c1)CCn1c-2cc(OCC2CCCO2)nc1=O	CHEMBL3718686	62.8977		64	41444	40.4925	12.7947	18.0786	40.4925	COc1cccc2c1CC[C@H]1CN(CCn3c(=O)[nH]c4c(sc5ccc(Cl)cc54)c3=O)C[C@@H]21	CHEMBL41444	46.1539
11336	11336	CHEMBL1386342	CCOc1ccc(-n2c(SCC(=O)Nc3ccc(OC)cc3)nc3sc4c(c3c2=O)CCN(C)C4)cc1	0	0	0	0	27.3852	20.7483	19.3719		1	3701250	33.5749	14.0661	20.0937		49	3718680	50.128	17.5164	30.6289	50.128	N#Cc1ccccc1-c1ccc2c(c1)CCn1c-2cc(OCC2COCCO2)nc1=O	CHEMBL3718710	61.3007		64	1939660	34.818	10.9885	16.1969	34.818	COc1ccc(-c2cc(C(F)(F)F)nc(SCC(=O)Nc3ccc4c(c3)OCO4)n2)cc1	CHEMBL1416960	39.9422
11742	11742	CHEMBL1367644	COc1ccccc1CNC(=O)CSc1ncc(S(=O)(=O)c2ccc(C)c(Cl)c2)c(=O)[nH]1	0	0	0	0	27.0515	23.5032	17.2681		1	4114706	33.0501	13.7957	19.8391		49	3718720	53.1154	18.6156	32.0144	53.1154	O=c1nc(OC[C@@H]2COCCO2)cc2n1CCc1cc(CCC3CC3)ccc1-2	CHEMBL3718720	64.7511		1	3892543	38.6872	12.2157	17.2806	38.6872	CN(Cc1ccccc1)C1CCN(c2nc(-c3cc(Cl)ccc3OC(F)F)c(NC(=O)c3cnn4cccnc34)s2)CC1	CHEMBL3892543	44.097
11798	11798	CHEMBL1999822	COc1cc(Br)cc2cc(-c3cn4c(n3)sc3ccccc34)c(=O)oc12	0	0	0	0	32.4823	28.9112	28.3148		1	3647515	33.2196	14.0014	19.9944		49	3718784	50.0986	17.6081	30.5619	50.0986	O=c1nc(OCC2CCCO2)cc2n1CCc1cc(OCc3cccc4ccccc34)ccc1-2	CHEMBL3718784	61.2694		64	1425436	40.1318	12.3681	17.8116	40.1318	COc1ccc(Cl)cc1Nc1nc(-c2sc(NC(=O)CC(C)C)nc2C)cs1	CHEMBL1425436	45.6156
11803	11803	CHEMBL4071917	COc1cc(-c2cccc(F)c2)c(Cl)cc1-c1nccc2cc(S(=O)(=O)Nc3ncon3)ccc12	0	0	0	0	23.0137	22.206	15.7082		1	3942076	33.0198	13.7759	19.8253		49	3718792	50.0182	17.4695	30.5987	50.0182	N#Cc1cccc(-c2ccc3c(c2)CCn2c-3cc(OCC3COCCO3)nc2=O)c1	CHEMBL3718792	61.1824		64	4166878	38.2023	12.0938	17.212	38.2023	C=CC(=O)Nc1cc(Nc2ncc(Cl)c(NCc3cccs3)n2)c(OC)cc1N1CCN(C)CC1	CHEMBL4166878	43.6111
11820	11820	CHEMBL1986669	COc1ccc(S(=O)(=O)Nc2ccc(-c3csc(N4C(=O)/C(=C/c5cccs5)N=C4c4ccccc4)n3)cc2)cc1Cl	0	0	0	0	28.0246	26.8518	18.2954		1	3927641	32.932	13.7452	19.8028		49	3718802	51.2335	17.8958	31.0663	51.2335	COCCOc1ccc2c(c1)CCn1c-2cc(OC[C@@H]2COCCO2)nc1=O	CHEMBL3718802	62.532		1	517123	36.309	11.3767	16.4348	36.309	CN(C)C(=O)O[C@H]1CN[C@H](C#Cc2cc3ncnc(Nc4ccc(OCc5cccc(F)c5)c(Cl)c4)c3s2)C1	CHEMBL517123	41.4473
11974	11974	CHEMBL1474140	COc1cc(Cl)c(C)cc1NC(=O)CSc1ncc(S(=O)(=O)c2ccc(C(C)(C)C)cc2)c(=O)[nH]1	0	0	0	0	16.6759	15.1424	12.8154		1	3954211	33.182	13.9798	19.8674		49	3718828	50.7696	17.7143	30.8969	50.7696	O=c1nc(OC[C@H]2COCCO2)cc2n1CCc1cc(COC3CCOCC3)ccc1-2	CHEMBL3718828	62.0159		1	3330232	39.5077	12.4583	17.8461	39.5077	COc1ccc2[nH]c(-c3c(N[C@H]4CCCNC4)c4cc(Cl)sc4[nH]c3=O)nc2c1	CHEMBL3330232	45.106
12033	12033	CHEMBL1344543	COc1cccc(-n2c(SCC(=O)NCc3cccs3)nc3ccccc3c2=O)c1	0	0	0	0	34.8257	28.0147	23.3024		1	4114695	33.0271	13.7945	19.8113		49	3718852	51.6826	18.0742	31.3295	51.6826	CN(c1ccc2c(c1)CCn1c-2cc(OC[C@@H]2COCCO2)nc1=O)C1CCCCC1	CHEMBL3718852	63.0817		64	528126	37.55	11.8677	16.4685	37.55	Fc1cccc(COc2ccc(Nc3ncnc4sc(C#CC5CCCCN5)cc34)cc2Cl)c1.O=C(O)C(F)(F)F	CHEMBL528126	42.6856
12046	12046	CHEMBL1425585	CCOc1ccc(-n2nnc3c(=O)n(C/C=C/c4ccccc4)cnc32)cc1	0	0	0	0	49.9416	34.2254	37.2342		1	3701244	32.9873	13.7203	19.9108		49	3718872	51.3152	18.0823	31.2376	51.3152	O=c1nc(OCC2CCCO2)cc2n1CCc1cc(-c3ccc4ccccc4c3)ccc1-2	CHEMBL3718872	62.7376		1	3920538	37.2025	11.7304	16.8162	37.2025	CN(CC1(C)COC1)C1CCN(c2nc(-c3cc(Cl)ccc3OC(F)F)c(NC(=O)c3cnn4cccnc34)s2)CC1	CHEMBL3920538	42.4784
12119	12119	CHEMBL1321798	CCn1c(CNC(=O)Cc2ccc(OC)cc2)nnc1SCC(=O)Nc1nccs1	0	0	0	0	45.3571	37.6178	29.287		1	3973427	33.0147	13.7626	19.8605		49	3719084	52.1407	18.2376	31.4852	52.1407	N#CCOc1ccc2c(c1)CCn1c-2cc(OCC2CCCO2)nc1=O	CHEMBL3719084	63.5813		63	4111301	38.3336	12.1991	17.015	38.3336	CCCN[C@H](CC(=O)N1CCN(c2nc(N)c3cc(OC)c(OC)c(F)c3n2)CC1)c1ccc(Cl)s1	CHEMBL4111301	43.6783
12190	12190	CHEMBL1497300	CN(C)CCCN(C(=O)COc1ccccc1)c1nc2c(Cl)cccc2s1.Cl	0	0	0	0	27.9757	20.2533	27.4689		1	3701251	33.5278	13.967	20.0915		49	3719089	48.8611	17.0582	29.6491	48.8611	O=C(COc1ccc2c(c1)CCn1c-2cc(OCC2COc3ccccc3O2)nc1=O)N1CCCC1	CHEMBL3719089	59.6444		64	4284832	37.0236	11.6124	16.6554	37.0236	CC(C)/C=C/C(=O)Nc1ccc(-c2cc3c(Nc4ccc(Oc5cccc(C(F)(F)F)c5)c(Cl)c4)ncnc3s2)cc1	CHEMBL4284832	42.2256
12366	12366	CHEMBL4100954	CCCNC(=O)[C@H]1C[C@@H]2CCC[C@H](C1)[C@H]2NC(=O)c1cc2scnc2n1Cc1ccc(OC)cc1	0	0	0	0	53.1905	16.7008	24.8984		1	4114795	33.0198	13.7759	19.8253		49	3719100	51.432	17.9639	31.286	51.432	COC(C)CCc1ccc2c(c1)CCn1c-2cc(OC[C@@H]2COCCO2)nc1=O	CHEMBL3719100	62.8233		1	4286733	36.4278	11.4406	16.4381	36.4278	O=C(Nc1ccc(-c2cc3c(Nc4ccc(Oc5cccc(C(F)(F)F)c5)c(Cl)c4)ncnc3s2)cc1)NC1CC1	CHEMBL4286733	41.5702
12485	12485	CHEMBL546076	CCOC(=O)N[C@@H]1CN[C@@H](C#Cc2cc3c(Nc4ccc(OCc5cccc(F)c5)c(Cl)c4)ncnc3s2)C1	0	0	0	0	36.0262	11.2967	16.2702		1	4114755	33.3144	14.0362	19.894		49	3719113	48.2375	16.8494	29.6382	48.2375	COc1ccc(OCCOc2ccc3c(c2)CCn2c-3cc(OCC3CCCO3)nc2=O)cc1	CHEMBL3719113	59.0693		1	3935428	36.2755	11.3949	16.4758	36.2755	CN(CCCC(N)=O)C1CCN(c2nc(-c3cc(Cl)ccc3OC(F)F)c(NC(=O)c3cnn4cccnc34)s2)CC1	CHEMBL3935428	41.4392
12516	12516	CHEMBL41344	COc1cccc2c1CC[C@H]1CN(CCn3c(=O)[nH]c4c(sc5cccc(OC)c54)c3=O)C[C@@H]21	0	0	0	0	39.7685	12.2126	20.4937		1	4114808	33.5558	14.0453	19.9659		49	3719125	52.4913	18.3813	31.6951	52.4913	O=c1nc(OC[C@@H]2COCCO2)cc2n1CCc1cc(OCCF)ccc1-2	CHEMBL3719125	64.014		64	521671	40.6039	12.541	17.8776	40.6039	COc1ccc(Cl)cc1Nc1nc(C)c(-c2csc(NC(=O)C(C)(C)C)n2)s1	CHEMBL521671	46.1038
12593	12593	CHEMBL179894	CCOC(=O)c1sc(Nc2nc(N3CCN(C)CC3)c3c(n2)N(Cc2cc(OC)c(OC)c(OC)c2)CCC3)nc1C	0	0	0	0	39.3915	11.7284	22.6116		1	4114723	33.0574	13.8143	19.8251		49	3719274	50.5792	17.7252	30.8131	50.5792	Cc1cccc(COc2ccc3c(c2)CCn2c-3cc(OCC3CCCO3)nc2=O)c1	CHEMBL3719274	61.8214		64	1643479	39.0244	12.2783	17.3927	39.0244	Nc1nc(-c2ccc(F)cc2)c2sc(N3CCN(C(=O)COc4ccc(Cl)cc4)CC3)nc2n1	CHEMBL1643479	44.4541
12846	12846	CHEMBL2362044	COc1cccc(-c2cc3nc(NCc4cccnc4)n(C)c(=O)c3s2)c1	0	0	0	0	27.892	21.3382	19.9292		1	3701252	33.5278	13.967	20.0915		64	591475	55.2021	19.4233	33.4579	55.2021	C#CCOc1ccc2c(c1)c(-c1ccc(C(C)C)cc1)nc(=O)n2Cc1ccccc1	CHEMBL591475	67.409		64	185771	38.3399	11.8908	17.1213	38.3399	Cc1nc2cc(OC[C@H](O)CN3CCN(Cc4nc(-c5ccc(Cl)c(Cl)c5)no4)CC3)ccc2s1	CHEMBL185771	43.6403
12881	12881	CHEMBL1087015	OCc1nc(-c2cnc(N3CCC(Oc4ccccc4C(F)(F)F)CC3)s2)no1	0	0	0	0	53.4403	16.5128	26.0254		1	3701248	32.9594	13.7244	19.8765		64	596789	54.0671	19.0156	32.9316	54.0671	C#CCOc1ccc2c(c1)c(-c1ccc(C(C)C)cc1)nc(=O)n2Cc1ccc(OCC)cc1	CHEMBL596789	66.1009		64	81337	41.3612	12.7958	18.2561	41.3612	CC(C)C(=O)N1CCC(CNc2nc3c(s2)CCOc2cc(Cl)c(F)cc2-3)CC1	CHEMBL81337	46.9869
13055	13055	CHEMBL364366	Cc1nc2cc(OC[C@H](O)CN3CCN(Cc4noc(-c5ccc(C(F)(F)F)cc5)n4)C[C@@H]3C)ccc2s1	0	0	0	0	38.4119	11.5931	19.5788		1	4114819	33.0501	13.7957	19.8391		64	597401	54.095	19.0054	32.9868	54.095	C#CCOc1ccc2c(c1)c(-c1ccc(C(C)C)cc1)nc(=O)n2Cc1ccc(OC)cc1	CHEMBL597401	66.1483		64	2377288	35.0804	10.9416	16.3951	35.0804	COc1cc2c(Nc3nc4ccc(C(=O)Nc5c(C)cccc5Cl)cc4s3)ncnc2cc1OCCCN1CCCC1	CHEMBL2377288	40.2387
13124	13124	CHEMBL1097960	COc1ccc(-c2cc(-c3ccccc3)nc(NC(=O)CN3CCOCC3)n2)cc1	0	0	0	0	38.4963	13.6064	21.4401		1	4114727	33.0574	13.8143	19.8251		64	598637	55.1977	19.4247	33.4491	55.1977	C#CCOc1ccc2c(c1)c(-c1ccc(C(C)C)cc1)nc(=O)n2Cc1cccc(CC)c1	CHEMBL598637	67.4014		64	536884	36.3699	11.4326	16.4165	36.3699	CCNC[C@H]1CCCN1CCOc1ccc(-n2cnc3cc(-c4ccc(Cl)cc4)sc3c2=O)cc1OC.O=C(O)C(F)(F)F	CHEMBL536884	41.5087
13195	13195	CHEMBL280456	CCc1nc2c(C)cc(C)nn2c1Cc1ccc(OC(C(=O)O)c2ccccc2)cc1	0	0	0	0	51.1181	36.1481	23.667		1	4114685	33.0271	13.7945	19.8113		64	604506	54.2129	19.0518	33.0111	54.2129	C#CCOc1ccc2c(c1)c(-c1ccc(C(C)C)cc1)nc(=O)n2Cc1cccc(OC)c1	CHEMBL604506	66.2702		64	3735416	38.0474	11.9841	17.3122	38.0474	O=C(c1cccc(-c2cc3ncnc(Nc4ccc(OCc5cccc(F)c5)c(Cl)c4)c3s2)c1)N1CCCCC1	CHEMBL3735416	43.4849
13310	13310	CHEMBL1258722	CCCOc1ccc(-c2nn3c(C)cc(C)nc3c2CC(=O)N(CC)CC)cc1	0	0	0	0	52.2823	35.4099	38.7426		1	3701249	33.6282	13.9998	20.0871		64	604713	55.1104	19.3941	33.4288	55.1104	C#CCOc1ccc2c(c1)c(-c1ccc(C(C)C)cc1)nc(=O)n2Cc1ccc(C(C)C)cc1	CHEMBL604713	67.311		64	568638	36.6329	10.9421	16.7033	36.6329	CN(C)c1ccc(NC(=S)N2CCC(c3nc(C(=O)NCCOc4ccccc4Cl)cs3)CC2)cc1	CHEMBL568638	41.7217
13378	13378	CHEMBL177982	CN1C(C(=O)Nc2nccs2)=C(O)c2ccc3ccccc3c2S1(=O)=O	0	0	0	0	29.9092	29.898	12.4407		1	3894014	33.6139	14.0523	20.0155		49	3715064	53.6953	18.8245	32.3411	53.6953	CC(C)C#Cc1ccc2c(c1)CCn1c-2cc(OC[C@@H]2COCCO2)nc1=O		65.4484		64	186257	38.5039	11.9	17.5464	38.5039	Cc1nc2cc(OC[C@H](O)CN3CCN(Cc4noc(-c5cccc(Cl)c5)n4)CC3)ccc2s1	CHEMBL186257	43.9549
13541	13541	CHEMBL1511261	COc1ccc(S(=O)(=O)N2CCOCC2)cc1NC(=O)CSc1n[nH]c2c3ccccc3nc-2n1	0	0	0	0	16.0769	15.6544	15.8935		1	4115686	33.6139	14.0523	20.0155		49	3717086	50.8899	17.7984	30.8294	50.8899	CC(C)OCCOc1ccc2c(c1)CCn1c-2cc(OC[C@@H]2COCCO2)nc1=O		62.1049		64	2069649	39.7268	12.2672	17.6842	39.7268	COC(=O)c1cn(-c2sc(Nc3cc(Cl)ccc3OC)nc2-c2sc(NC(=O)C(C)(C)C)nc2C)nn1	CHEMBL2069649	45.1822
13878	13878	CHEMBL1372869	C=CCn1c(SCC(=O)NCc2ccc3c(c2)OCO3)nc2scc(-c3ccc(F)cc3)c2c1=O	0	0	0	0	34.6787	27.7905	26.2483		1	3824089	33.844	14.1833	20.5692		49	3719092	53.3347	18.7116	32.1249	53.3347	O=c1nc(OC[C@H]2COCCO2)cc2n1CCc1cc(C#CC3CC3)ccc1-2		65.0133		64	2079472	36.5002	11.6011	16.407	36.5002	CC(C)(C)C(=O)NCCn1ccc2ncnc(Nc3ccc(Oc4cccc5sncc45)c(Cl)c3)c21	CHEMBL2079472	41.6658
14056	14056	CHEMBL251560	CC(=O)Nc1nc2c(Oc3cc(-c4ccc(C(F)(F)F)cc4)nc(NC(C)c4cccnc4)n3)cccc2s1	0	0	0	0	27.2652	20.2714	20.2709		1	3647517	33.9885	14.1963	20.47		49	3716365	53.3347	18.7116	32.1249	53.3347	O=c1nc(OC[C@H]2COCCO2)cc2n1CCc1cc(C#CC3CC3)ccc1-2		65.0133		64	495335	40.128	12.402	17.7344	40.128	COc1ccc(Cl)cc1Nc1nc(-c2cnc(NC(=O)C(C)(C)C)s2)cs1	CHEMBL495335	45.5914
14118	14118	CHEMBL1601777	COc1ccc(NC(=O)CCCn2c(=O)c3sccc3n(Cc3cccc(C)c3)c2=O)cc1	0	0	0	0	35.1917	28.6222	23.7829		1	3917698	34.1898	14.4819	20.2717		49	3718618	51.3937	17.952	31.2739	51.3937	COCCCc1ccc2c(c1)CCn1c-2cc(OC[C@H]2COCCO2)nc1=O		62.7825		1	466175	36.309	11.3767	16.4348	36.309	CN(C)C(=O)O[C@H]1CN[C@H](C#Cc2cc3ncnc(Nc4ccc(OCc5cccc(F)c5)c(Cl)c4)c3s2)C1	CHEMBL517123	41.4473
14237	14237	CHEMBL2298448	N#CC1=C(N)Oc2[nH]c(=O)[nH]c(=S)c2C12C(=O)N(CCBr)c1ccccc12	0	0	0	0	32.2362	22.8884	21.8209		1	3823255	33.8336	14.2322	20.3752		49	3718289	52.5444	18.4166	31.6833	52.5444	C=CCOc1ccc2c(c1)CCn1c-2cc(OC[C@@H]2COCCO2)nc1=O		64.0618		64	3358694	39.963	12.259	17.8877	39.963	COc1ccc(Cl)cc1Nc1nc(-c2nnc(NC(=O)C(C)(C)C)o2)cs1	CHEMBL3358694	45.4675
14256	14256	CHEMBL561560	CCNC(=O)c1cc2c(-c3cc(OCCNCCOC)c(Cl)cc3Cl)nc(N)nc2s1	0	0	0	0	26.9052	20.099	16.7159		1	4114722	33.9028	14.3395	20.1218		49	3715404	52.5444	18.4166	31.6833	52.5444	C=CCOc1ccc2c(c1)CCn1c-2cc(OC[C@@H]2COCCO2)nc1=O		64.0618		1	450396	34.9319	10.9579	16.0895	34.9319	O=C(OC1CNC(C#Cc2cc3ncnc(Nc4ccc(OCc5cccc(F)c5)c(Cl)c4)c3s2)C1)N1CCOCC1	CHEMBL1885298	39.9898
14822	14822	CHEMBL1257595	C=CCSc1nnc2c(n1)O[C@@H](c1cccs1)N(C(=O)CC)c1ccccc1-2	0	0	0	0	49.1762	39.2705	38.7952		1	4114660	34.4313	14.6376	19.9618		49	3717904	50.3035	17.6125	30.76	50.3035	N#Cc1cccc(-c2ccc3c(c2)CCn2c-3cc(OCC3CCCO3)nc2=O)c1		61.5371		64	1652667	39.8094	12.5607	17.686	39.8094	Nc1nc(N2CCN(C(=O)COc3ccc(Cl)cc3)CC2)c2nc(Cc3ccc(F)cc3)sc2n1	CHEMBL1652667	45.336
15009	15009	CHEMBL1603482	Cc1ccc(CSc2nc(=O)c3c(n2C)NC(=O)CC3c2ccc(OC(C)C)cc2)cc1	0	0	0	0	55.7801	18.2837	26.3784		1	4114703	34.444	14.5607	20.2861		49	3718653	55.0005	19.3213	32.9704	55.0005	CC(C)[C@H]1CC(COc2cc3n(c(=O)n2)CCc2cc(C#CC4CC4)ccc2-3)O1		66.9732		64	3323400	40.3154	12.4607	17.7866	40.3154	COc1ccc(Cl)cc1Nc1nc2c(s1)CCCc1nc(NC(=O)C(C)C)sc1-2	CHEMBL3323400	45.7926
15113	15113	CHEMBL1996184	COc1cc2nc(-c3cccs3)nc(Nc3ccccc3C(=O)NN)c2cc1OC	0	0	0	0	35.872	21.3064	24.4726		1	3981330	34.2625	14.4744	20.2884		49	3717796	50.128	17.5164	30.6289	50.128	N#Cc1ccccc1-c1ccc2c(c1)CCn1c-2cc(OCC2COCCO2)nc1=O		61.3007		1	3931929	39.3221	12.4471	17.465	39.3221	O=C(Nc1sc(N2CCN(CCc3ccccc3)CC2)nc1-c1cc(Cl)ccc1OC(F)F)c1cnn2cccnc12	CHEMBL3931929	44.7904
15169	15169	CHEMBL3199786	CCOC(=O)C1=C(C)N=c2s/c(=C/c3ccc(OCC(=O)O)cc3)c(=O)n2C1c1cc(OC)c(OC)c(OC)c1	0	0	0	0	37.6639	35.1918	20.4466		1	3903249	34.0647	14.3451	20.2662		49	3718710	50.128	17.5164	30.6289	50.128	N#Cc1ccccc1-c1ccc2c(c1)CCn1c-2cc(OCC2COCCO2)nc1=O		61.3007		64	3893952	36.6934	10.9065	16.44	36.6934	CCCCc1cnc(Nc2ncnc3cc(OCCCN4CCOCC4)c(OC)cc23)s1	CHEMBL201655	41.6609
15550	15550	CHEMBL119706	COC(=O)C1C2CC3CCC1N3C/C2=C\c1nccs1	0	0	0	0	11.1827	0.930032	19.5344		1	3903870	34.0647	14.3451	20.2662		49	3715907	53.1154	18.6156	32.0144	53.1154	O=c1nc(OC[C@@H]2COCCO2)cc2n1CCc1cc(CCC3CC3)ccc1-2		64.7511		64	1652669	39.5732	12.467	17.6272	39.5732	Nc1nc(N2CCN(C(=O)COc3ccc(Cl)cc3)CC2)c2nc(CCc3ccc(F)cc3)sc2n1	CHEMBL1652669	45.0797
15649	15649	CHEMBL1433394	CCN(CC)CCCN(C(=O)c1ccco1)c1nc(-c2ccc(Cl)cc2)cs1.Cl	0	0	0	0	28.0687	20.2692	26.7458		1	3702827	33.8264	14.2123	20.1035		49	3717967	50.0182	17.4695	30.5987	50.0182	N#Cc1cccc(-c2ccc3c(c2)CCn2c-3cc(OCC3COCCO3)nc2=O)c1		61.1824		1	442912	33.5294	10.8283	15.3222	33.5294	CCOC(=O)NN1CCN(CCCOc2cc3ncc(C#N)c(Nc4ccc(Sc5nc(C)c(C)n5CC)c(Cl)c4)c3cc2OC)CC1	CHEMBL442912	38.4219
15752	15752	CHEMBL177442	CN(C)C(=N)NC1=NC(=O)/C(=C/c2ccc(N3CCC(NC[C@H](O)COc4cccc5[nH]c(O)nc45)CC3)cc2)S1	0	0	0	0	30.1222	9.4345	17.5811		1	3824233	33.7578	14.1451	20.5798												1	517585	36.2614	11.3588	16.4132	36.2614	CCN(C)C(=O)O[C@H]1CN[C@H](C#Cc2cc3ncnc(Nc4ccc(OCc5cccc(F)c5)c(Cl)c4)c3s2)C1	CHEMBL517585	41.3921
15753	15753	CHEMBL1097545	Cc1nc2c3c(c(C(=O)N(C)C)cc2n1C)CC[C@@H](c1cccs1)O3	0	0	0	0	32.7549	28.1113	30.3981		1	3933092	34.1809	14.3636	20.2208												1	2048911	34.0783	10.7928	15.9641	34.0783	Cl.O=C(NCCn1ccc2ncnc(Nc3ccc(Oc4cccc5sncc45)c(Cl)c3)c21)[C@@H]1CCCN1	CHEMBL2048911	39.1493
15773	15773	CHEMBL1564149	Cc1ccccc1OCc1cc(=O)n2c(-c3ccccc3)csc2n1	0	0	0	0	32.8313	26.8323	28.8014		1	3701284	34.5204	14.3912	20.4828												64	588545	35.6554	11.176	16.3528	35.6554	Cl.O=C(O[C@H]1CN[C@H](C#Cc2cc3c(Nc4ccc(OCc5cccc(F)c5)c(Cl)c4)ncnc3s2)C1)N1CCCC1	CHEMBL588545	40.7876
15906	15906	CHEMBL1591691	COc1ccccc1NC(=O)CCc1nc(O)c2c3c(sc2n1)CCCC3	1	0	0	0	33.9486	27.2531	24.0758		1	3824116	34.4363	14.5071	20.2428												64	3956000	35.8651	11.0415	16.2422	35.8651	COc1ccc2nc(-c3ccc(O)c4c3C3(CCN(CC(C)(C)C)CC3)CN4c3ccccc3NC(=O)Nc3nc4ccc(Cl)cc4s3)sc2c1	CHEMBL3956000	40.8905
15924	15924	CHEMBL524586	Cc1cc(NCCC(=O)NCCOc2ccccc2)nc(NCc2ccccc2C)n1.O=C(O)C(F)(F)F	0	0	0	0	29.3225	19.9797	20.9257		1	4114712	33.9415	14.3136	20.1799												1	4084191	34.1167	10.4464	15.8301	34.1167	O=C(Nc1cccc(Cl)c1)Nc1cccc(CNc2nc3ccc(OCCN4CCOCC4)cc3s2)c1	CHEMBL4084191	39.0342
15986	15986	CHEMBL2387496	COc1ccc(-c2cc(C(=O)Nc3nc4ccc(F)cc4s3)nc3cc(-c4ccccc4)nn23)cc1	0	0	0	0	47.5874	39.4094	29.1813		1	3702842	34.3819	14.507	20.2353												1	461869	35.3469	11.042	16.1621	35.3469	CCNC(=O)O[C@H]1CN[C@H](C#Cc2cc3ncnc(Nc4ccc(OCc5cccc(F)c5)c(Cl)c4)c3s2)C1	CHEMBL512076	40.4047
16145	16145	CHEMBL1520565	COc1ccc(C(=O)Nc2cccc(C(=O)OCc3cc(=O)n4c5c(sc4n3)CCCC5)c2)cc1	0	0	0	0	35.8535	29.4151	23.9027		1	4114793	34.2987	14.4994	20.2412												1	3944383	38.2308	12.0844	17.0424	38.2308	CN(C)CCC1CCN(c2nc(-c3cc(Cl)ccc3OC(F)F)c(NC(=O)c3cnn4cccnc34)s2)CC1	CHEMBL3944383	43.5668
16202	16202	CHEMBL1968795	COc1ccc(C2=NNC(=O)c3ccccc3N2c2nc(-c3cccs3)nc3cc(OC)c(OC)cc23)cc1	0	0	0	0	48.2886	39.3255	33.0985		1	3982962	33.8264	14.2123	20.1035												64	81337	41.3612	12.7958	18.2561	41.3612	CC(C)C(=O)N1CCC(CNc2nc3c(s2)CCOc2cc(Cl)c(F)cc2-3)CC1	CHEMBL81337	46.9869
16579	16579	CHEMBL361830	CCOC(=O)c1sc(Nc2nc(N3CCNCC3)c3c(n2)N(Cc2cc(OC)c(OC)c(OC)c2)CCC3)nc1C	0	0	0	0	38.7613	11.5055	22.2702		1	4114764	34.5511	14.4861	20.3656												64	4226319	31.7805	9.8192	15.2064	31.7805	Cc1ncsc1-c1ccc(CNC(=O)[C@@H]2C[C@@H](O)CN2C(=O)[C@@H](NC(=O)COCCCOCCCCOCCCOc2ccc(Nc3ncc(Cl)c(NCCCN(C)C(=O)C4CCC4)n3)cc2)C(C)(C)C)cc1	CHEMBL4226319	36.5739
16633	16633	CHEMBL1272082	O=C(c1ccc(F)cc1)c1cnc(-c2ccc(OCc3ccccc3)cc2)n1S(=O)(=O)c1ccccc1	0	0	0	0	22.6348	20.5361	23.7696		1	3968888	33.7394	14.0984	20.0176												64	3323405	40.5141	12.5164	17.8775	40.5141	COc1ccc(Cl)cc1Nc1nc2c(s1)CCCCc1nc(NC(=O)C(C)(C)C)sc1-2	CHEMBL3323405	46.018
16674	16674	CHEMBL124983	COc1cc2c(N3CCN(C(=O)Nc4ccc(OC(C)C)cc4)CC3)ncnc2cc1OCCCS(=O)(=O)CC(F)(F)F	0	0	3	0	15.8964	14.3981	16.268		1	3823104	33.7836	14.2246	20.5888												64	1652668	39.7446	12.5543	17.6357	39.7446	CC(c1ccc(F)cc1)c1nc2c(N3CCN(C(=O)COc4ccc(Cl)cc4)CC3)nc(N)nc2s1	CHEMBL1652668	45.2577
16680	16680	CHEMBL1098157	Cn1cnc(-c2cc3nccc(Oc4ccc(NC(=O)c5cnn(C)c5C(F)(F)F)cc4F)c3s2)c1	0	0	3	0	46.9287	38.5968	29.0861		1	3647970	34.1386	14.4368	20.2637												1	3974690	34.7593	10.9552	15.9347	34.7593	CN(CC1(C#N)CCCCC1)C1CCN(C(=O)C2CCN(c3nc(-c4cc(Cl)ccc4OC(F)F)c(NC(=O)c4cnn5cccnc45)s3)CC2)CC1	CHEMBL3974690	39.7761
16690	16690	CHEMBL355324	COc1cc(NS(=O)(=O)c2ccc(NC(=O)c3ccccc3SSc3ccccc3C(=O)Nc3ccc(S(=O)(=O)Nc4cc(OC)ncn4)cc3)cc2)ncn1	0	0	0	0	24.9952	22.0687	19.4036		1	3639541	34.1597	14.3338	20.4324												1	512076	35.3469	11.042	16.1621	35.3469	CCNC(=O)O[C@H]1CN[C@H](C#Cc2cc3ncnc(Nc4ccc(OCc5cccc(F)c5)c(Cl)c4)c3s2)C1	CHEMBL512076	40.4047
16756	16756	CHEMBL249983	CC(=O)Nc1nc2c(Oc3cc(-c4ccc(C(F)(F)F)cc4)nc(C)n3)cccc2s1	0	0	0	0	33.6246	27.7041	24.111		1	4115679	34.5141	14.4844	20.2529												1	499534	33.3291	10.4337	15.5709	33.3291	O=C(O[C@H]1CN[C@H](C#Cc2cc3ncnc(Nc4ccc(OCc5cccc(F)c5)c(Cl)c4)c3s2)C1)N1CCNCC1	CHEMBL499534	38.238
17164	17164	CHEMBL527557	COc1ccc(-n2ccnc2SCC(=O)Nc2cc(C(F)(F)F)ccc2Cl)c(OC)c1	0	0	0	0	34.4879	29.7698	20.5185		1	4114773	34.5511	14.4861	20.3656												1	3898459	38.9596	12.3115	17.4097	38.9596	O=C(Nc1sc(N2CC(N3CCCCC3)C2)nc1-c1cc(Cl)ccc1OC(F)F)c1cnn2cccnc12	CHEMBL3922979	44.4131
17401	17401	CHEMBL1094809	COc1ccccc1C1C2=C(N=c3s/c(=C\c4ccc(OCC(=O)O)cc4)c(=O)n31)c1ccccc1CC2	0	0	0	0	38.0183	35.4832	20.698		1	1223169	33.7807	14.4158	20.621												64	1652677	39.1959	12.4053	17.4517	39.1959	Nc1nc(N2CCN(C(=O)COc3ccc(Cl)cc3)CC2)c2nc(-c3cccnc3)sc2n1	CHEMBL1652677	44.6629
17563	17563	CHEMBL89151	CCOc1ccc(S(=O)(=O)N2CCN(CC)CC2)cc1-c1nc2c(=O)n(C)c(=O)n(CC(C)C)c2[nH]1	0	0	0	0	16.0482	12.9609	14.8638		1	3889963	34.3819	14.507	20.2353												1	3891220	36.8938	11.6287	16.8694	36.8938	CN1CCN(C(=O)c2ccc(-c3nc(-c4cc(Cl)ccc4OC(F)F)c(NC(=O)c4cnn5cccnc45)s3)cc2)CC1	CHEMBL3891220	42.2014
17567	17567	CHEMBL553485	COc1ccc(/C=N/c2nc3[nH]nc(C)n3c(=O)c2S(=O)(=O)NN2C(=O)C(CN3CCOCC3)SC2c2cccs2)cc1	0	0	0	0	15.2442	11.8002	14.4355		1	4114691	34.3817	14.5399	20.2627												64	41396	40.5284	12.8098	18.0654	40.5284	COc1cccc2c1CC[C@H]1CN(CCn3c(=O)[nH]c4c(sc5c(Cl)cccc54)c3=O)C[C@@H]21	CHEMBL41396	46.1844
17768	17768	CHEMBL245789	CCCc1nn(C)c2c(=O)[nH]c(-c3cc(S(=O)(=O)N4CCN(CCO)CC4)cc4c3OCO4)nc12	0	0	0	0	15.733	12.3033	15.6481		1	3949721	33.9771	14.3001	20.1631												64	3954151	40.2407	12.4938	17.6658	40.2407	COc1ccc2nc(NC(=O)CN3CCN(Cc4ccc(Cl)cc4)CC3)sc2c1	CHEMBL3954151	45.6891
17774	17774	CHEMBL4070149	Cc1cc(C)nc(SCC(=O)Nc2cccc(COc3ccc(NC(=O)c4cccs4)cc3)c2)n1	0	0	0	0	36.4723	29.2382	23.9784		1	4114656	34.1809	14.3636	20.2208												1	500381	36.4274	11.412	16.4757	36.4274	CCC(=O)O[C@H]1CN[C@H](C#Cc2cc3ncnc(Nc4ccc(OCc5cccc(F)c5)c(Cl)c4)c3s2)C1	CHEMBL500381	41.5769
17812	17812	CHEMBL4061827	COc1ncc(-c2ccc3ncn([C@@H]4CCN(C(=O)C5CC5)C4)c(=O)c3c2)cc1NS(=O)(=O)c1ccc(F)cc1	0	0	0	0	15.8928	14.6771	14.7438		1	3972359	34.6333	14.5928	20.4119												64	3924797	36.7731	10.924	16.5065	36.7731	CC(C)CN1CCC2(CC1)CN(c1ccccc1NC(=O)Nc1ccc(OC(F)(F)F)cc1)c1c(O)ccc(-c3nc4cc(Cl)ccc4s3)c12	CHEMBL3924797	41.7619
17870	17870	CHEMBL162518	N=C(N)NCCC[C@H](NC(=O)CN1CC(=O)N[C@H](CCCNC(=N)N)C1=O)C(=O)c1nccs1	1	0	0	0	7.95416	3.44351	2.87796		1	4114689	34.5827	14.5169	20.381												1	466586	35.3831	11.0575	16.1664	35.3831	CNC(=O)O[C@H]1CN[C@H](C#Cc2cc3ncnc(Nc4ccc(OCc5cccc(F)c5)c(Cl)c4)c3s2)C1	CHEMBL466586	40.4424
17927	17927	CHEMBL1450881	CCOc1ccc(NC(=O)Cn2nc(-c3ccccc3Cl)n(CC)c2=S)cc1	0	0	0	0	61.8053	41.8318	29.7832		1	4115692	34.5699	14.5079	20.3679												64	291154	40.5439	12.8228	18.0732	40.5439	COc1cccc2c1CC[C@H]1CN(CCn3c(=O)[nH]c4c(sc5cccc(Cl)c54)c3=O)C[C@@H]21	CHEMBL291154	46.2047
18014	18014	CHEMBL1705866	COc1ccccc1CNS(=O)(=O)c1c(C)nc2sccn2c1=O	0	0	0	0	28.0057	24.4954	20.5469		1	4114651	34.6487	14.5644	20.3587												1	3914707	37.7804	11.884	17.0918	37.7804	CN1C[C@H]2CN(Cc3nc(-c4cc(Cl)ccc4OC(F)F)c(NC(=O)c4cnn5cccnc45)s3)C[C@H]2C1	CHEMBL3914707	43.136
18016	18016	CHEMBL4078492	O=C(NCc1cccc(OCCCOc2nc[nH]n2)c1)c1nc2scc(-c3ccccc3Cl)c2c(=O)[nH]1	1	0	0	0	45.8095	37.7612	25.665		1	4114661	34.6757	14.5868	20.3664												1	3946179	40.6814	12.9182	17.9068	40.6814	O=C(Nc1sc(CN2CCCCC2)nc1-c1cc(Cl)ccc1OC(F)F)c1cnn2cccnc12	CHEMBL3946179	46.2873
18403	18403	CHEMBL4292670	CCCOc1cc(NC(C)=O)nc(SC(C)c2ccccc2)n1	0	0	0	0	33.2733	25.4467	23.6851		1	4115689	34.659	14.5693	20.3333												64	2377286	34.9579	10.9281	16.2712	34.9579	CN(C(=O)N1CC[C@H](n2cnc3cc(-c4ccc5c(c4)OCCO5)sc3c2=O)C1)[C@H]1CCN(C2CCOCC2)C1	CHEMBL395979	40.0778
18425	18425	CHEMBL1527874	Cc1cc(C)cc(OC(C)C(=O)Nc2ccc(S(=O)(=O)Nc3cc(C)nc(C)n3)cc2)c1	0	0	0	0	23.323	20.6335	19.0757		1	4114802	34.7671	14.6902	20.3586												1	3700903	36.7594	11.2116	16.8318	36.7594	COc1ccc(C(=O)N[C@@H](c2cccc(C(=O)Nc3nc4c(s3)CN(C)CC4)c2)C2CC2)cc1Cl	CHEMBL3700903	41.9555
18704	18704	CHEMBL186246	COc1ccc(-c2nc(CN3CCN(C[C@@H](O)COc4ccc5sc(C)nc5c4)CC3)no2)cc1	0	0	0	0	37.1259	11.1419	19.1975		1	3701247	34.5955	14.4163	20.3816												1	3700983	35.4568	10.8048	16.6135	35.4568	COc1ccc(C(=O)N2CCC[C@@H]2c2cccc(C(=O)Nc3nc4c(s3)C[C@@H](N3CCOCC3)CC4)c2)cc1Cl	CHEMBL3700983	40.6194
18752	18752	CHEMBL1561499	COc1ccc(-n2c(NCCN(C)C)nc3sc4c(c3c2=O)CCCCC4)cc1	0	0	0	0	28.2213	21.7905	20.0782		1	4110649	34.6487	14.5644	20.3587												64	1652673	40.5614	12.7834	17.9663	40.5614	CCCCCc1nc2c(N3CCN(C(=O)COc4ccc(Cl)cc4)CC3)nc(N)nc2s1	CHEMBL1652673	46.1674
19241	19241	CHEMBL1571314	COc1ccc(-c2ccc(-c3noc(C)n3)c(OC)n2)cc1	0	0	0	0	50.5345	32.4058	36.6116		1	3891008	34.7692	14.7128	20.3929												1	200085	32.8592	10.5729	15.5464	32.8592	COc1cc2c(Nc3ccc(Cl)cc3F)ncnc2cc1OCCNC(=O)CCCCC1SCC2NC(=O)NC21	CHEMBL200085	37.8577
19377	19377	CHEMBL3781942	O=C(NC1C2CC3CC(C2)CC1C3)c1nc(Cc2ccccc2)cc(Oc2ccccc2)n1	0	0	0	0	55.6268	20.1452	27.5002		1	4114702	34.6562	14.6181	20.4011												64	3667164	33.119	10.2092	15.7762	33.119	CCC(=O)Nc1nc(C)c(C(=O)N[C@@H](C)c2ccc(O[C@@H]3CCN(c4ncnc(NCC5CC5)c4Cl)C3)cc2)s1	CHEMBL3667164	38.0787
19596	19596	CHEMBL3822827	COc1cc(-c2ncn(C)c2-c2ccc3c(c2)c(Cl)c(Cl)n3C)cc(Br)c1OC.Cl	0	0	0	0	43.5045	29.3811	38.0385		1	3701243	34.6175	14.4324	20.3738												64	2078666	34.0893	10.8013	15.9465	34.0893	O=C(NCCn1ccc2ncnc(Nc3ccc(Oc4cccc5sncc45)c(Cl)c3)c21)[C@@H]1CCCN1	CHEMBL2078666	39.154
19608	19608	CHEMBL1519965	COc1ccc(-c2cc3nc(C)n(N)c(=O)c3s2)cc1	0	0	0	0	37.0642	22.1117	22.3589		1	3912377	34.6609	14.5732	20.3561												1	505626	36.2962	11.3701	16.4321	36.2962	CCN(CC)C(=O)O[C@H]1CN[C@H](C#Cc2cc3ncnc(Nc4ccc(OCc5cccc(F)c5)c(Cl)c4)c3s2)C1	CHEMBL505626	41.4332
19703	19703	CHEMBL1869645	COc1ccc(CNC(=O)CSc2nc3nc(C)cc(C)n3n2)cc1	0	0	0	0	50.9024	39.1898	31.2544		1	4114716	34.5564	14.5012	20.3761												64	3358692	40.0068	12.2714	17.9043	40.0068	COc1ccc(Cl)cc1Nc1nnc(-c2csc(NC(=O)C(C)(C)C)n2)o1	CHEMBL3358692	45.5159
20057	20057	CHEMBL104531	COc1ccccc1N1CCN(Cc2csc3nc4ccccc4c(=O)n23)CC1	0	0	0	0	41.169	11.9932	26.2481		1	4114765	34.7356	14.6707	20.3913												64	3339030	34.4576	10.7753	15.8333	34.4576	O=C(CCCCCCC(=O)Nc1cc2c(Nc3ccc(O[C@H]4CCOC4)c(Cl)c3)ncnc2s1)NO	CHEMBL3339030	39.4224
20181	20181	CHEMBL547924	Cc1cc2nc(-c3ccc(SCC(=O)Nc4ccc5c(c4)OCCO5)nc3)[nH]c2cc1C	0	0	0	0	35.4874	29.8956	26.3432		1	4114665	34.5699	14.5079	20.3679												64	3667174	31.945	9.8259	15.3948	31.945	CCC(=O)Nc1nc(C)c(C(=O)N[C@@H](C)c2ccc(O[C@@H]3CCN(c4ncnc(NCC5(O)CCC5)c4Cl)C3)cc2)s1	CHEMBL3667174	36.7972
20356	20356	CHEMBL127835	CCOc1cc2ncnc(Nc3cccc(-c4csc(C(=O)O)n4)c3)c2cc1OCC	0	0	0	0	28.0548	21.4727	15.0407		1	4108729	34.6487	14.5644	20.3587												64	3925340	36.0974	11.121	16.2419	36.0974	CC(C)(C)CN1CCC2(CC1)CN(c1ccccc1NC(=O)Nc1nc3ccc(OC(F)(F)F)cc3s1)c1c(O)ccc(Cl)c12	CHEMBL3925340	41.1157
20489	20489	CHEMBL1541198	CCOC(=O)Cc1csc(NC(=O)COc2c(C)cccc2C)n1	0	0	0	0	34.4304	32.5612	25.8407		1	4114766	34.7796	14.706	20.3684												64	441059	41.4787	12.8424	18.2997	41.4787	CC(C)C(=O)N1CCC(CNc2nc3c(s2)CCOc2cc(F)c(Cl)cc2-3)CC1	CHEMBL441059	47.1199
20676	20676	CHEMBL1224337	O=C(O)[C@H](Cc1ccc(OCc2c(Cl)cccc2Cl)cc1)NC(=O)[C@@H]1OCO[C@H]1C(=O)Nc1nccs1	0	0	0	0	52.5633	16.6554	20.2699		1	3901377	34.5827	14.5169	20.381												1	4078692	34.7127	10.7565	16.0143	34.7127	O=C(Nc1ccc(Cl)c(Cl)c1)n1ccc(CNc2nc3ccc(OCCN4CCOCC4)cc3s2)n1	CHEMBL4078692	39.7131
20765	20765	CHEMBL1539245	COc1ccc(NC(=O)CSc2nc3sc(C)cc3c(=O)n2C)c(OC)c1	0	0	0	0	34.2909	27.7134	23.1709		1	3701242	34.6335	14.3504	20.4936												64	493915	39.9785	12.3506	17.5041	39.9785	COc1ccc(Cl)cc1Nc1nc(-c2cccc(NC(=O)C(C)(C)C)c2)c(C)s1	CHEMBL493915	45.3565
20889	20889	CHEMBL3214094	COc1ccc(/C=c2/sc3n(c2=O)NC2(c4ccccc4)N(C)C(=O)N(C)C2(c2ccccc2)N=3)cc1	1	0	0	0	35.8576	21.2901	22.1785		1	4114704	34.6718	14.6211	20.3895												64	588164	35.6505	11.1787	16.3359	35.6505	O=C(O[C@H]1CN[C@H](C#Cc2cc3c(Nc4ccc(OCc5cccc(F)c5)c(Cl)c4)ncnc3s2)C1)N1CCCC1	CHEMBL588164	40.7772
20974	20974	CHEMBL1996476	Cc1cc(OCC(=O)N/N=C/C(Br)=C/c2ccccc2)nc(SCC(=O)N/N=C/C(Br)=C/c2ccccc2)n1	0	0	0	0	50.2185	38.2991	31.4228		1	4114753	34.5699	14.5079	20.3679												64	1885298	34.9319	10.9579	16.0895	34.9319	O=C(OC1CNC(C#Cc2cc3ncnc(Nc4ccc(OCc5cccc(F)c5)c(Cl)c4)c3s2)C1)N1CCOCC1	CHEMBL1885298	39.9898
21080	21080	CHEMBL1420076	O=C(CSc1ncnc2c1cnn2-c1ccc(Cl)cc1)NCc1ccc2c(c1)OCO2	0	0	0	0	48.9465	39.5393	26.2701		1	4114690	34.5827	14.5169	20.381												64	295741	39.9774	12.6984	17.793	39.9774	COc1cccc2c1CC[C@H]1CN(CCn3c(=O)[nH]c4c(sc5ccc(Cl)nc54)c3=O)C[C@@H]21	CHEMBL295741	45.5635
21135	21135	CHEMBL1442176	COc1ccc(-c2csc(C3=C(N)N(Cc4ccc(Cl)cc4)CC3=O)n2)cc1OC	0	0	0	0	29.3504	21.7423	17.0838		1	4108779	34.6487	14.5644	20.3587												64	3262835	41.7202	12.7934	18.2376	41.7202	O=C(CN1CCN(CCOc2ccccc2Cl)CC1)Nc1nccs1	CHEMBL3262835	47.2954
21151	21151	CHEMBL3986729	Cc1cc(COc2c(C)cccc2-c2csc(N3CC[C@@]4(C(=O)O)C[C@H]4C3)n2)c(C)c2c1CN(C1CCOCC1)CC2	0	0	0	0	25.0928	7.82763	19.5104		1	3701245	34.5988	14.4213	20.3741												64	3323407	40.5827	12.5393	17.9062	40.5827	COc1ccc(Cl)cc1Nc1nc2c(s1)CCCCc1nc(NC(=O)C(C)C)sc1-2	CHEMBL3323407	46.0958
21155	21155	CHEMBL3941005	Cc1ccc(OCc2ccc3c(c2C)CCN(CC2COCCO2)CC3)c(-c2csc(N3CC[C@@]4(C(=O)O)C[C@H]4C3)n2)c1	0	0	0	0	25.0688	7.84089	19.3781		1	4114699	34.6718	14.6211	20.3895												64	186484	38.3927	11.9017	17.1515	38.3927	Cc1nc2cc(OC[C@H](O)CN3CCN(Cc4nc(-c5ccc(Cl)cc5Cl)no4)CC3)ccc2s1	CHEMBL186484	43.7015
21195	21195	CHEMBL3915242	CCO[C@@H]1CN(c2nc(-c3cc(C)ccc3OCc3cc4c(c(OC)c3)CN(C3CCOCC3)CC4)cs2)CC[C@@H]1C(=O)O	0	0	0	0	27.4275	8.12536	20.7951		1	3894476	34.6674	14.6286	20.4162												64	289437	39.8475	12.6344	17.7482	39.8475	C=CC(=O)N1CCC(Oc2cc3c(Nc4cccc(SC)c4)ncnc3cc2OC)CC1	CHEMBL3975339	45.4142
21229	21229	CHEMBL1972837	COc1ccc(/C=c2\sc3n(c2=O)C(N)=C(C#N)C(c2ccc(OC)cc2)C=3c2nc3ccccc3[nH]2)cc1	0	0	0	0	27.6823	20.7864	19.8889		1	3940151	34.5699	14.5079	20.3679												64	1643476	40.2744	12.6831	17.8362	40.2744	Nc1nc(N2CCN(C(=O)COc3ccc(Cl)cc3)CC2)c2sc(-c3ccc(F)cc3)nc2n1	CHEMBL1643476	45.8369
21247	21247	CHEMBL3914172	CO[C@H]1CN(c2nc(-c3cccc(Cl)c3OCc3ccc4c(c3)[C@@H](C)CN(C3CCOCC3)CC4)cs2)CC[C@H]1C(=O)O	0	0	0	0	27.8885	8.20744	21.6998		1	3922858	34.5699	14.5079	20.3679												64	4117101	34.7677	10.5862	15.9256	34.7677	COc1ccc(-c2csc(Nc3ccc(-c4noc(C[C@@H]5CCCN5C(=N)N)n4)cc3)n2)cc1Cl	CHEMBL4117101	39.6798
21400	21400	CHEMBL1967956	COc1ccc(-c2nc(SCC(=O)N/N=C/c3ccc([N+](=O)[O-])cc3)[nH]c2-c2ccc(OC)cc2)cc1	0	0	0	0	32.6017	16.1388	20.1936		1	4114732	34.6609	14.5732	20.3561												64	4085330	34.7401	10.5685	15.9368	34.7401	COc1ccc(-c2csc(Nc3ccc(-c4noc(C[C@@H]5CCCN5C(=N)N)n4)cc3)n2)cc1Cl.Cl	CHEMBL4085330	39.6554
21538	21538	CHEMBL410565	O=C(Cc1cc(Nc2ncnc3cc(OCCCN4CCC[C@@H]4COP(=O)(O)O)ccc23)n[nH]1)Nc1cccc(F)c1F	0	0	0	0	29.9715	12.848	18.5119		1	4114770	34.6718	14.6211	20.3895												64	1652655	40.1092	12.6509	17.7728	40.1092	Nc1nc(N2CCN(C(=O)COc3ccc(Cl)cc3)CC2)c2nc(-c3ccc(F)cc3)sc2n1	CHEMBL1652655	45.6581
21672	21672	CHEMBL529560	O=C(COc1ccc(C(=O)c2ccccc2)cc1)Nc1nccs1	0	0	0	0	35.3147	33.4468	24.4387		1	4114688	34.5699	14.5079	20.3679												64	1652656	39.4712	12.443	17.5771	39.4712	CC(C)(Oc1ccc(Cl)cc1)C(=O)N1CCN(c2nc(N)nc3sc(-c4ccc(F)cc4)nc23)CC1	CHEMBL1652656	44.964
21705	21705	CHEMBL2006117	COc1cc(S(=O)(=O)Nc2ccc(-c3csc(N4C(=O)C(C)SC4c4ccccc4O)n3)cc2)ccc1Cl	0	0	0	0	15.9419	15.8974	12.8234		1	3984974	34.5699	14.5079	20.3679												64	3735893	38.1812	12.0261	17.335	38.1812	O=C(c1cccc(-c2cc3c(Nc4ccc(OCc5cccc(F)c5)c(Cl)c4)ncnc3s2)c1)N1CCCCC1	CHEMBL3735893	43.6226
21741	21741	CHEMBL1979308	COc1ccc(S(=O)(=O)Nc2ccc(-c3csc(N4C(=O)/C(=C/c5ccccc5[N+](=O)[O-])N=C4c4ccccc4)n3)cc2)cc1Cl	0	0	0	0	20.9812	15.1491	13.7228		1	3702838	34.7341	14.635	20.3754												64	184312	38.4779	11.8941	17.5361	38.4779	Cc1nc2cc(OC[C@H](O)CN3CCN(Cc4noc(-c5ccc(Cl)cc5)n4)CC3)ccc2s1	CHEMBL184312	43.9265
21798	21798	CHEMBL1485964	CCN(CC)C(=O)Cn1cnc2sc(C(=O)N3CCN(Cc4ccc5c(c4)OCO5)CC3)c(C)c2c1=O	0	0	0	0	38.593	11.2955	23.7041		1	4114709	34.5699	14.5079	20.3679												1	3330233	39.7036	12.5729	17.8879	39.7036	COc1ccc2[nH]c(-c3c(NC4CN5CCC4CC5)c4cc(Cl)sc4[nH]c3=O)nc2c1	CHEMBL3330233	45.3258
21815	21815	CHEMBL40310	COc1cccc2c1CC[C@H]1CN(CCn3c(=O)[nH]c4c(sc5ccc(C)cc54)c3=O)C[C@@H]21	0	0	0	0	40.5282	12.4737	20.7658		1	4114710	34.6487	14.5644	20.3587												64	3694553	35.5848	11.0599	16.5892	35.5848	Cc1cc(C#N)c(NC(=O)c2cc3nc(Nc4c(Cl)ccc(CNC(=O)C(C)(C)C)c4Cl)n(C)c3cc2OCC(F)F)s1	CHEMBL3694553	40.7897
21910	21910	CHEMBL3125565	CCOc1cccc(CC(=O)Nc2nc(-c3ccc(Br)cc3)cs2)c1	0	0	0	0	34.3144	32.2078	24.9953		1	3922830	34.5757	14.5022	20.379												64	2069648	38.4634	11.8599	17.1554	38.4634	COc1ccc(Cl)cc1Nc1nc(-c2sc(NC(=O)C(C)(C)C)nc2C)c(-n2cc(CO)nn2)s1	CHEMBL2069648	43.7538
21913	21913	CHEMBL241203	Cc1nc2c3c(c(C(=O)N(C)C)cn2c1C)CCC(c1cccs1)O3	0	0	0	0	32.0683	28.1339	30.0744		1	4114800	34.6431	14.6076	20.4005												64	3910354	36.7772	10.924	16.4795	36.7772	CC(C)(C)CN1CCC2(CC1)CN(c1ccccc1NC(=O)Nc1ccc(OC(F)(F)F)cc1)c1c(O)ccc(-c3nc4ccc(Cl)cc4s3)c12	CHEMBL3910354	41.7549
21988	21988	CHEMBL1081255	NC(=O)c1cnc(N2CC[C@H](Oc3ccccc3C(F)(F)F)C2)s1	0	0	0	0	55.5562	17.146	26.5249		1	4114740	34.6431	14.6076	20.4005												64	1652666	40.2036	12.7276	17.8742	40.2036	Nc1nc(N2CCN(C(=O)COc3ccc(Cl)cc3)CC2)c2cc(-c3ccc(F)cc3)sc2n1	CHEMBL1652666	45.8018
21996	21996	CHEMBL1097427	CCOC(=O)COc1cccc(/C=c2\sc3n(c2=O)C(c2ccccc2OC)C2=C(N=3)c3ccccc3CC2)c1	0	0	0	0	36.6767	33.4611	32.3105		1	3975610	34.5699	14.5079	20.3679												64	3891478	36.0934	11.1254	16.2237	36.0934	COc1ccc2nc(NC(=O)Nc3ccccc3N3CC4(CCN(CC(C)(C)C)CC4)c4c(Cl)ccc(O)c43)sc2c1	CHEMBL3891478	41.1062
22040	22040	CHEMBL1970846	CC1(C)OC2C(CCP(=O)(O)O)OC(c3nc(C(N)=O)cs3)C2O1	0	0	0	0	8.49748	2.25842	2.85405		1	4167139	34.7356	14.6707	20.3913												64	587268	36.4726	11.3366	16.8809	36.4726	C[C@@H](Oc1cc(-n2cnc3cc(SCCN4CCN(C)CC4)ccc32)sc1C(N)=O)c1ccccc1Cl	CHEMBL587268	41.758
22131	22131	CHEMBL1390952	COc1ccccc1NC(=O)CCCNC(=O)Cn1cnc2sc(C)c(C)c2c1=O	0	0	0	0	35.5509	28.7915	23.7108		1	3823451	34.4213	14.4638	20.7321												64	2078705	35.3132	11.2309	16.0626	35.3132	CC(C)(O)C(=O)NCCn1ccc2ncnc(Nc3ccc(Oc4cccc5sncc45)c(Cl)c3)c21	CHEMBL2078705	40.3877
22203	22203	CHEMBL1472242	CCN(CC(=O)Nc1ccc2c(c1)OCCO2)Cc1cc(=O)n2ccsc2n1	0	0	0	0	27.7967	20.9235	21.6461		1	3955983	34.5471	14.557	20.7481												1	3922979	38.9596	12.3115	17.4097	38.9596	O=C(Nc1sc(N2CC(N3CCCCC3)C2)nc1-c1cc(Cl)ccc1OC(F)F)c1cnn2cccnc12	CHEMBL3922979	44.4131
22339	22339	CHEMBL1580682	Cc1nn(Cc2noc(C(=O)NCc3ccc4c(c3)OCO4)n2)c(C)c1Br	0	0	0	0	48.9944	33.7302	30.9962		1	3657210	34.7546	14.7324	20.7472												1	1794069	37.2103	11.6474	17.0165	37.2103	CC(Oc1cc(-n2cnc3ccc(OCC4CCN(C)CC4)cc32)sc1C(N)=O)c1ccccc1Cl	CHEMBL1904574	42.5421
22567	22567	CHEMBL3264716	COc1ccc(Cc2nn3c(-c4ccc(OCC(=O)N(C)C)cc4)csc3nc2=O)cc1	0	0	0	0	45.7775	37.436	36.9998		1	474832	35.1539	14.8014	20.4945												1	3912946	38.8249	12.2803	17.2706	38.8249	CC(=O)N1CC2CN(Cc3ccc(Oc4nc5ncccc5s4)cc3)CC2C1	CHEMBL2207749	44.2318
22991	22991	CHEMBL1455464	O=C(Nc1nccs1)c1cc2c(s1)-c1ccccc1OC2	0	0	0	0	33.7573	32.0154	23.5782		1	3604940	34.8571	14.908	20.6166												1	3918206	38.7182	12.2398	17.322	38.7182	CN(C)C1CCN(C(=O)c2nc(-c3cc(Cl)ccc3OC(F)F)c(NC(=O)c3cnn4cccnc34)s2)CC1	CHEMBL3918206	44.1471
23116	23116	CHEMBL469294	CCn1c(Sc2ccc(Nc3c(C#N)cnc4cc(OCCCN(C)C)c(OC)cc34)cc2Cl)nc(C)c1C	0	0	3	0	25.4382	17.6697	34.4859		1	3604941	35.0883	14.9776	20.714												64	3323406	40.2045	12.4023	17.857	40.2045	COc1ccc(Cl)cc1Nc1nc2c(s1)CCCCc1nc(NC(=O)C3CC3)sc1-2	CHEMBL3323406	45.7066
23390	23390	CHEMBL1435226	COc1ccc(-c2csc(NC(=O)C3CCN(c4ncnc5sc(C)c(C)c45)CC3)n2)cc1OC	0	2	0	0	53.8891	16.7032	27.409		1	3604937	34.8968	14.9567	20.6372												1	466614	35.3469	11.042	16.1621	35.3469	CCNC(=O)O[C@H]1CN[C@H](C#Cc2cc3ncnc(Nc4ccc(OCc5cccc(F)c5)c(Cl)c4)c3s2)C1	CHEMBL512076	40.4047
23550	23550	CHEMBL1563955	CC(C)Oc1cccc(C(=O)C2CCCN(Cc3cnc(N4CCOCC4)s3)C2)c1	0	0	0	0	39.4955	11.166	25.5514		1	3604938	34.8765	14.9276	20.6656												64	1652672	39.3462	12.3876	17.5469	39.3462	Nc1nc(N2CCN(C(=O)COc3ccc(Cl)cc3)CC2)c2nc(CCCCc3ccc(F)cc3)sc2n1	CHEMBL1652672	44.8271
23603	23603	CHEMBL3451105	O=C(C[S+]([O-])Cc1csc(C2CCCC2)n1)NC1CCCC1	0	0	0	0	8.50971	2.34374	3.53156		1	3745919	35.3656	14.9417	20.9215												64	290387	39.584	12.5267	17.7525	39.584	COc1cccc2c1CC[C@H]1CN(CCn3c(=O)[nH]c4c(sc5ncc(Cl)nc54)c3=O)C[C@@H]21	CHEMBL290387	45.1549
23635	23635	CHEMBL259316	CCOc1ccc2c(c1)n1ncc(C(=O)c3cccs3)c1n[n+]2[O-]	0	0	0	0	36.8193	21.561	28.9438		1	3941424	35.2563	14.8993	20.6408												64	600599	40.672	12.8811	18.0661	40.672	Nc1nc(N2CCN(C(=O)COc3ccc(Cl)cc3)CC2)c2ccsc2n1	CHEMBL600599	46.3305
23791	23791	CHEMBL1409571	Cc1ccccc1NC(=O)Cn1c(=O)n(CCCCCC(=O)NCc2ccc3c(c2)OCO3)c(=O)c2sccc21	0	0	0	0	37.1536	30.218	27.4653		1	3647518	35.4069	14.9365	20.9584												1	4110442	37.2009	11.6438	17.0542	37.2009	COc1cc(C(=O)Nc2ncc(C)s2)ccc1-c1nc([C@@H]2CC[C@H]3CCC(=O)N3C2)n2c(Cl)cnc(N)c12	CHEMBL4110442	42.548
23876	23876	CHEMBL3527118	CCN(CC)C(=O)Cc1c(-c2ccc(OCCF)cc2)nn2c(C)cc(CO)nc12	0	0	0	0	51.6958	36.0367	30.5235		1	3964023	35.2422	14.8925	20.6422												64	4279269	37.3003	11.751	16.6255	37.3003	CC(C)(C)OC(=O)N1CCC[C@H]1C#Cc1cc2ncnc(Nc3ccc(OCc4cccc(F)c4)c(Cl)c3)c2s1	CHEMBL4279269	42.4948
24150	24150	CHEMBL123364	COc1cc2c(=NCc3ccccc3)[nH]cnc2c(OC)c1OC	0	0	0	0	36.1166	24.8243	38.6867		1	4114719	35.462	14.9081	20.687												1	3934458	36.4716	11.4939	16.5387	36.4716	CN(CC(F)(F)F)C1CCN(C(=O)C2CCN(c3nc(-c4cc(Cl)ccc4OC(F)F)c(NC(=O)c4cnn5cccnc45)s3)CC2)CC1	CHEMBL3934458	41.6631
24292	24292	CHEMBL3899147	CC(=O)N1CCC[C@H]1C(=O)N[C@@H](CC(C)C)C(=O)N[C@@H](Cc1cncn1CCCCCCO/N=C/c1ccc(-c2nc3ccccc3s2)o1)C(=O)N[C@@H](CO)C(=O)N[C@H](C(N)=O)[C@@H](C)OP(=O)(O)O	0	0	0	0	46.4812	14.6144	21.3491		1	260860	35.6429	14.9861	20.6251												64	580952	36.039	11.3893	16.0658	36.039	Clc1cc(Nc2ncnc3sc(C#C[C@H]4CCCN4)cc23)ccc1OCc1cccnc1Cl.O=C(O)C(F)(F)F	CHEMBL580952	41.0687
24901	24901	CHEMBL1933728	O=C(O)c1csc(SCCN2C(=O)CC[C@@H]2/C=C/[C@@H](O)CC2CCCC2)n1	0	0	0	0	6.02186	1.71131	0.92439		1	260861	35.6429	14.9861	20.6251												1	447365	34.9319	10.9579	16.0895	34.9319	O=C(OC1CNC(C#Cc2cc3ncnc(Nc4ccc(OCc5cccc(F)c5)c(Cl)c4)c3s2)C1)N1CCOCC1	CHEMBL1885298	39.9898
24908	24908	CHEMBL3805325	C#Cc1cccc(Nc2ncnc3cc(OCC4CCCO4)c4c(c23)OCCO4)c1	0	0	3	0	39.8019	12.7956	33.9289		1	260024	36.2498	15.1388	21.1395												1	466412	36.309	11.3767	16.4348	36.309	CN(C)C(=O)O[C@H]1CN[C@H](C#Cc2cc3ncnc(Nc4ccc(OCc5cccc(F)c5)c(Cl)c4)c3s2)C1	CHEMBL517123	41.4473
25239	25239	CHEMBL1163247	CCOC(=O)c1cc2cc(Nc3ncnc4cc(OCCCN5CCN(c6ccccc6)CC5)c(OC)cc34)ccc2s1	0	0	0	0	35.5792	10.6402	21.0265		1	261744	36.2093	15.0463	21.1324												64	3901297	36.7367	10.9073	16.4909	36.7367	CC(C)(C)CN1CCC2(CC1)CN(c1ccccc1NC(=O)Nc1ccc(OC(F)(F)F)cc1)c1c(O)ccc(-c3nc4cc(Cl)ccc4s3)c12	CHEMBL3901297	41.7193
25675	25675	CHEMBL1896899	COc1ccc(CN(CC(=O)NC(C)C)C(=O)CCC(=O)Nc2nccs2)cc1	0	0	0	0	53.9084	16.4745	25.7752		1	410296	36.2498	15.1388	21.1395												1	451513	35.5693	11.1431	16.3293	35.5693	O=C(O[C@H]1CN[C@H](C#Cc2cc3ncnc(Nc4ccc(OCc5cccc(F)c5)c(Cl)c4)c3s2)C1)N1CCCC1	CHEMBL451513	40.6939
25782	25782	CHEMBL3634165	COc1ccc2c(O[C@H]3C[C@H]4C(=O)N(C)CCCC/C=C/[C@@H]5C[C@@]5(C(=O)NS(=O)(=O)C5CC5)NC(=O)N4C3)cc(-c3noc(C)n3)nc2c1C	0	0	0	0	10.4654	10.2676	11.8545		1	3921655	36.0575	15.1583	21.0826												64	493914	39.9368	12.3167	17.4951	39.9368	COc1ccc(Cl)cc1Nc1nc(-c2cccc(NC(=O)C(C)(C)C)c2)cs1	CHEMBL493914	45.307
25845	25845	CHEMBL1514567	Cc1cc(C)cc(OCc2cc(=O)n3c(-c4ccccc4)csc3n2)c1	0	0	0	0	32.8152	26.7715	28.873		1	475882	35.8813	15.1173	20.6969												64	3605345	38.4472	11.8849	17.1272	38.4472	COc1ccc2nc(NC(=O)CCCCN3CCN(c4ccc(Cl)cc4)CC3)sc2c1.Cl	CHEMBL3605345	43.7353
25916	25916	CHEMBL1463590	Cc1ccc(-c2csc(N(CCc3ccccc3)C(=O)COc3ccccc3)n2)cc1	0	0	0	0	34.5873	31.8642	30.9762		1	3647967	35.9961	15.1441	21.0682												1	4069775	33.5115	10.2646	15.5192	33.5115	O=C(Nc1ccc(Cl)cc1)Nc1ccc(CNc2nc3ccc(OCCC4CCCCN4)cc3s2)cc1	CHEMBL4069775	38.3305
26053	26053	CHEMBL3526469	COc1ccc2nc(COc3ccc(CC4(O)SC(=O)NC4=O)cc3)n(C)c2c1	0	0	0	0	51.2336	16.5132	25.1185		1	3912266	35.9961	15.1441	21.0682												1	525805	35.9296	11.2574	16.2471	35.9296	CCOC(=O)N[C@H]1CN[C@H](C#Cc2cc3ncnc(Nc4ccc(OCc5cccc(F)c5)c(Cl)c4)c3s2)C1	CHEMBL525805	41.0077
26201	26201	CHEMBL1940545	COc1ccc(C2(N[C@@H]3CC[C@H](C(=O)N4CCN(c5nc6cc(F)ccc6[nH]5)CC4)[C@@H](c4ccsc4)C3)CCC2)cc1	0	0	0	4	37.0446	11.2102	19.7275		1	3974518	35.9611	15.163	21.0427												1	448243	33.7296	10.9093	15.4396	33.7296	CCNC(=O)N1CCN(CCCOc2cc3ncc(C#N)c(Nc4ccc(Sc5nc(C)c(C)n5CC)c(Cl)c4)c3cc2OC)CC1	CHEMBL448243	38.6663
26317	26317	CHEMBL3814040	COc1cc(/C=c2/sc3nc4ccccc4n3c2=O)ccc1OCc1nnn[nH]1	0	0	0	0	46.7045	38.3802	31.4109		1	2070083	36.3043	15.3609	21.0866												64	4210718	40.5776	12.797	17.9725	40.5776	Nc1nc(N2CCN(C(=O)COc3ccc(Cl)cc3)CC2)c2ncsc2n1	CHEMBL4210718	46.1878
26370	26370	CHEMBL3394567	COc1ccc(Cc2cnc(NC(=O)/C=C/c3ccco3)s2)cc1	0	0	0	0	35.3498	33.0622	24.2832		1	478642	36.262	15.3216	20.8343												1	453398	34.6266	10.8516	15.9737	34.6266	O=C(O[C@H]1CN[C@H](C#Cc2cc3ncnc(Nc4ccc(Oc5ccccn5)c(Cl)c4)c3s2)C1)N1CCOCC1	CHEMBL453398	39.6474
26574	26574	CHEMBL3408958	CCN(CC)C(=O)Cc1c(-c2ccc(OC(C)C)cc2)nn2c(C)cc(C)nc12	0	0	0	0	53.9267	23.5478	35.0337		1	405893	36.2265	15.1372	21.0511												1	1209016	34.6889	10.9007	16.4243	34.6889	C[C@@H](Oc1cc(-n2cnc3cc(-c4cnn(CCN5CCN(C)CC5)c4)ccc32)sc1C(N)=O)c1ccccc1Cl	CHEMBL1209016	39.8987
26600	26600	CHEMBL1590471	CCN(c1ccccc1)S(=O)(=O)c1ccc(OC)c(NC(=O)CCc2nc(O)c3ccccc3n2)c1	0	0	0	0	23.7047	21.2383	19.2289		1	406418	36.2444	15.152	21.0004												64	3605350	38.5463	11.9312	17.1348	38.5463	COc1ccc2nc(NC(=O)CCCCN3CCN(c4ccccc4Cl)CC3)sc2c1	CHEMBL3605350	43.838
26744	26744	CHEMBL185771	Cc1nc2cc(OC[C@H](O)CN3CCN(Cc4nc(-c5ccc(Cl)c(Cl)c5)no4)CC3)ccc2s1	0	0	0	0	38.3399	11.8908	17.1213		1	259200	35.9898	15.055	20.778												64	563327	38.0944	11.8847	17.4434	38.0944	CCNC(=O)c1cc2c(-c3cc(OCCN4CCCC4)c(Cl)cc3Cl)nc(N)nc2s1	CHEMBL563327	43.5511
26831	26831	CHEMBL1098933	CCCCn1nc(-c2ccc(OC(F)(F)F)cc2)nc2c(=O)n(C)c(=O)nc1-2	0	0	0	0	51.7511	34.6993	38.2058		1	475780	36.4606	15.3647	21.2421												1	504117	34.4424	10.8019	15.9643	34.4424	O=C(O[C@H]1CN[C@H](C#Cc2cc3ncnc(Nc4ccc(OCc5ccccn5)c(Cl)c4)c3s2)C1)N1CCOCC1	CHEMBL504117	39.4692
26958	26958	CHEMBL595092	COc1cnc(-c2ccc(Cn3c(CC(C)(C)C(=O)O)c(SC(C)(C)C)c4cc(OC[C@@H]5Cc6ccccc6N5C(C)=O)ccc43)cc2)nc1	0	0	0	0	50.9514	17.0585	19.4225		1	4228138	36.1904	15.197	21.2568												64	1876487	37.6533	11.8199	17.1184	37.6533	CC(Oc1cc(-n2cnc3ccc(OC4CCN(C)CC4)cc32)sc1C(N)=O)c1ccccc1Cl	CHEMBL1876487	43.0177
27258	27258	CHEMBL1096449	CC(C)c1csc(-c2nnc(S)n2/N=C/c2ccccc2O)n1	0	0	0	0	54.638	13.8462	50.5244		1	261743	36.2093	15.0463	21.1324												1	3950547	40.2996	12.7798	17.7532	40.2996	O=C(Nc1sc(N2CCN(CC(F)(F)F)CC2)nc1-c1cc(Cl)ccc1OC(F)F)c1cnn2cccnc12	CHEMBL3950547	45.8536
27441	27441	CHEMBL1995845	COc1ccc(C2SC(C)C(=O)N2c2nc(-c3nc(-c4ccc(Cl)cc4)cs3)cs2)cc1	0	0	0	0	53.5238	15.233	35.503		1	4107999	35.8064	15.0922	20.948												1	3919476	39.5358	12.5051	17.5177	39.5358	CCCCN(C)C1CCN(c2nc(-c3cc(Cl)ccc3OC(F)F)c(NC(=O)c3cnn4cccnc34)s2)CC1	CHEMBL3919476	45.0147
27465	27465	CHEMBL3343255	COc1ccc(OC[C@@]2(c3ccccc3)C[C@H]2C(=O)Nc2nc(C)cs2)cc1OC	0	0	0	0	56.5045	17.0868	28.6624		1	513915	36.3157	15.2605	20.8564												1	3700931	36.9922	11.3123	17.0307	36.9922	COc1ccc(C(=O)N2CCC[C@@H]2c2cccc(C(=O)Nc3nc4c(s3)CN(C)CC4)c2)cc1Cl	CHEMBL3700931	42.2662
27602	27602	CHEMBL1357392	COc1ccc(NC(=O)CSc2nc(-c3ccccc3)[nH]c2-c2ccccc2)cc1OC	0	0	0	0	34.1126	28.924	25.8673		1	4068155	35.9444	15.3211	21.132												64	4280687	35.9224	11.3233	16.2223	35.9224	CC(C)(C)OC(=O)N1CCN(CC#Cc2cc3ncnc(Nc4ccc(OCc5cccc(F)c5)c(Cl)c4)c3s2)CC1	CHEMBL4280687	41.0097
27635	27635	CHEMBL1643988	C=CC(=O)Nc1cccc(Sc2nc(Nc3ccc(N4CCN(C)CC4)cc3OC)ncc2Cl)c1	0	0	0	0	36.035	11.6845	16.4219		1	4109651	35.9611	15.163	21.0427												64	2377284	34.9275	10.913	16.2581	34.9275	COc1cc2c(Nc3nc4ccc(C(=O)Nc5c(C)cccc5Cl)cc4s3)ncnc2cc1OCCCN1CCCCC1C	CHEMBL2377284	40.0418
27716	27716	CHEMBL1893543	COc1cccc(-c2ccc3nnc(SCC(=O)Nc4ccc(NC(C)=O)cc4)n3n2)c1	0	0	0	0	48.3815	38.0806	30.2683		1	3647514	35.5759	15.0197	21.0027												64	3667176	31.9408	9.8208	15.4088	31.9408	CCC(=O)Nc1nc(C)c(C(=O)N[C@@H](C)c2ccc(O[C@@H]3CCN(c4ncnc(NCC(C)(C)O)c4Cl)C3)cc2)s1	CHEMBL3667176	36.798
27876	27876	CHEMBL444428	CCc1cc2c(NCCc3ccc(OC)c(OC)c3)ncnc2s1	0	0	0	0	27.7942	20.4739	32.2764		1	3647516	35.6232	15.0408	21.0097												49	3589155	36.8148	11.5454	16.8933	36.8148	COc1cc(-n2cnc3cc(-c4ccc(Cl)cc4)sc3c2=O)ccc1OCC(C)(C)OC(=O)CN	CHEMBL3589155	42.119
27985	27985	CHEMBL565086	Clc1ccc(C2CC(c3cc4ccccc4o3)=NN2c2nc(-c3ccc(Br)cc3)cs2)cc1	0	0	0	0	41.944	36.5743	39.0606		1	3905432	36.7499	15.4131	21.3875												64	532855	35.8875	11.2309	16.3199	35.8875	CCC(=O)N[C@@H]1CN[C@@H](C#Cc2cc3c(Nc4ccc(OCc5cccc(F)c5)c(Cl)c4)ncnc3s2)C1	CHEMBL532855	40.9925
28099	28099	CHEMBL1548593	COc1ccc(CNC(=O)CSc2nn3c(=O)c(C(C)(C)C)nnc3s2)cc1OC	0	0	0	0	53.3822	16.9934	27.3609		1	3647965	36.8421	15.4658	21.4059												1	4061107	34.1002	10.4389	15.8222	34.1002	O=C(Nc1ccc(Cl)cc1)Nc1cccc(CNc2nc3ccc(OCCN4CCOCC4)cc3s2)c1	CHEMBL4061107	39.0146
28125	28125	CHEMBL501359	CCn1c(Sc2ccc(Nc3c(C#N)cnc4cc(OCCCN5CCC(O)CC5)c(OC)cc34)cc2Cl)nc(C)c1C	0	0	3	0	32.7649	8.25087	33.0386		1	4107879	36.7499	15.4131	21.3875												64	3358693	40.1905	12.4047	17.664	40.1905	COc1ccc(Cl)cc1Nc1nnc(-c2csc(NC(=O)C(C)(C)C)n2)s1	CHEMBL3358693	45.6198
28126	28126	CHEMBL1595841	COc1cc(C(=O)Nc2nc(-c3ccc(Cl)cc3)c(C)s2)ccc1OCC(=O)Nc1ccc(F)cc1	0	0	0	0	36.5641	33.4059	22.3957		1	3910496	36.6588	15.3858	21.3618												64	1652675	40.1295	12.6645	17.756	40.1295	Nc1nc(N2CCN(C(=O)COc3ccc(Cl)cc3)CC2)c2nc(-c3ccc(Cl)cc3)sc2n1	CHEMBL1652675	45.6732
28390	28390	CHEMBL3495206	COc1ccccc1CC(=O)NCc1c(C)nc2cc(=O)[nH]n2c1C	0	0	0	0	51.5236	36.2776	30.3016		1	3669312	36.8421	15.4658	21.4059												1	3923734	38.1736	12.058	17.1198	38.1736	O=C(Nc1sc(-c2ccc(CN3CC(F)C3)cc2)nc1-c1cc(Cl)ccc1OC(F)F)c1cnn2cccnc12	CHEMBL3923734	43.5397
28593	28593	CHEMBL4087967	O=C(Nc1ccc(Oc2ncnc3cc(Cl)ccc23)nc1)c1ccc(-c2ccccn2)s1	0	0	0	0	34.4785	28.4828	20.7446		1	3647966	36.8421	15.4658	21.4059												1	3910933	38.7161	12.2389	17.2799	38.7161	CN(C)C1CCN(Cc2nc(-c3cc(Cl)ccc3OC(F)F)c(NC(=O)c3cnn4cccnc34)s2)CC1	CHEMBL3910933	44.1285
28605	28605	CHEMBL4077930	COc1cc2ncnc(Oc3ccc(NC(=O)Nc4cccc(C(F)(F)F)c4)c4ccccc34)c2cc1OC	0	0	3	0	37.2493	28.0988	26.5131		1	4109796	36.6588	15.3858	21.3618												64	2046448	34.7778	10.9026	15.9604	34.7778	O=C(Nc1cccc(Cl)c1)Nc1nnc(Sc2ncnc3cc(OCCCN4CCOCC4)ccc23)s1	CHEMBL2046448	39.7881
29294	29294	CHEMBL1087014	Cc1nc(-c2cnc(N3CCC(Oc4ccccc4C(F)(F)F)CC3)s2)no1	0	0	0	0	55.0022	16.3405	32.4581		1	2070079	37.2389	15.7102	21.4659												64	3912092	36.7837	11.5478	16.8785	36.7837	COc1cc(-n2cnc3cc(-c4ccc(Cl)cc4)sc3c2=O)ccc1OCC1(OC(=O)CN)CC1	CHEMBL3912092	42.0865
29323	29323	CHEMBL1590611	COc1ccccc1NC(=O)CSc1nc(-c2ccccc2F)nc2cc(=O)[nH]n12	0	0	0	0	50.1329	39.194	30.9273		1	3182647	36.8783	15.5459	21.3896												64	3605352	38.4686	11.8985	17.1148	38.4686	COc1ccc2nc(NC(=O)CCCCN3CCN(c4ccc(Cl)cc4F)CC3)sc2c1	CHEMBL3605352	43.753
29362	29362	CHEMBL560014	C[C@@H](Oc1cc(-c2cnc3ccccn23)sc1C(N)=O)c1ccccc1Cl	0	0	3	0	33.0981	29.7016	20.5803		1	4106607	36.9755	15.574	21.4197												1	3894185	40.0903	12.4967	17.503	40.0903	CC(=O)N[C@]1(Cc2cccc(Nc3nccs3)n2)CC[C@@H](Oc2cccc(Cl)c2F)CC1	CHEMBL3894185	45.4946
29384	29384	CHEMBL3891220	CN1CCN(C(=O)c2ccc(-c3nc(-c4cc(Cl)ccc4OC(F)F)c(NC(=O)c4cnn5cccnc45)s3)cc2)CC1	0	0	3	0	36.8938	11.6287	16.8694		1	3647973	36.8944	15.5839	21.381												1	3937124	39.7613	12.6676	17.3678	39.7613	COc1cc(C)cc2cc(-c3c(CN4CCNC(=O)C4)c(Cl)n4ncnc(N)c34)sc12	CHEMBL3937124	45.2003
29447	29447	CHEMBL443410	CCn1c(Sc2ccc(Nc3c(C#N)cnc4cc(OCCCNS(=O)(=O)c5ccccc5)c(OC)cc34)cc2Cl)nc(C)c1C	0	0	3	0	23.7262	16.2685	32.4209		1	3701255	36.9876	15.4876	21.2866												64	587171	35.2773	11.026	16.1289	35.2773	CCNC(=O)N[C@@H]1CN[C@@H](C#Cc2cc3c(Nc4ccc(OCc5cccc(F)c5)c(Cl)c4)ncnc3s2)C1	CHEMBL587171	40.3262
29510	29510	CHEMBL4079210	COc1ccc2c(c1)NC(=O)CN2c1nc(NC2CC2)nc2ccccc12	0	0	0	0	39.8431	14.2975	21.8639		1	3647969	36.9304	15.5279	21.4805												64	3667169	33.7975	10.3777	16.0328	33.7975	CCCNc1ncnc(N2CC[C@@H](Oc3ccc([C@H](C)NC(=O)c4sc(NC(=O)CC)nc4C)cc3)C2)c1Cl	CHEMBL3667169	38.8203
29526	29526	CHEMBL4082462	Nc1ncnc2c1c(-c1ccc(OCCN3CCOCC3)cc1)nn2-c1ccc(NC(=O)Nc2nc(C(F)(F)F)cs2)cc1	0	0	0	0	33.8951	10.1934	19.1375		1	3647971	36.9268	15.5707	21.3166												64	363662	38.4003	11.905	17.1772	38.4003	Cc1nc2cc(OC[C@H](O)CN3CCN(Cc4nc(-c5ccc(Cl)cc5)no4)CC3)ccc2s1	CHEMBL363662	43.7192
29601	29601	CHEMBL4095713	COc1ccc2c(c1)NC(=O)CN2c1nc(NCCCO)nc2ccccc12	0	0	0	0	31.2376	21.0218	21.5862		1	3929922	36.9755	15.574	21.4197												64	1939656	34.8553	11.0075	16.2104	34.8553	COc1cc2c(Nc3ccc4sc(C(=O)Nc5c(C)cccc5Cl)cc4c3)ncnc2cc1OCCCN1CCCCC1	CHEMBL1939656	39.9854
29709	29709	CHEMBL3718462	COc1cc(OCc2csc(NCc3cccc(N(C)C)c3)n2)c2cc(-c3cn4nc(C)ccc4n3)oc2c1	0	0	0	0	31.1691	18.9551	19.1518		1	3647964	36.8783	15.5459	21.3896												1	466615	36.309	11.3767	16.4348	36.309	CN(C)C(=O)O[C@H]1CN[C@H](C#Cc2cc3ncnc(Nc4ccc(OCc5cccc(F)c5)c(Cl)c4)c3s2)C1	CHEMBL517123	41.4473
29855	29855	CHEMBL377758	COc1cc(-n2cnc3cc(-c4ccc(NC(C)=O)cc4)sc3c2=O)ccc1OCCN1CCCC1	0	0	0	4	35.664	10.6157	20.9383		1	3655253	37.8427	15.9113	21.3599												64	3603856	38.4318	11.8783	17.1074	38.4318	COc1ccc2nc(NC(=O)CCCCN3CCN(c4ccc(Cl)cc4F)CC3)sc2c1.Cl	CHEMBL3603856	43.7122
29910	29910	CHEMBL214429	COc1cc(-n2cnc3cc(-c4ccc(C#N)cc4)sc3c2=O)ccc1OCCN1CCCC1	0	0	0	4	37.0045	10.8204	23.0936		1	4228086	37.1217	15.5474	21.6922												64	1652678	39.5636	12.5004	17.6342	39.5636	Nc1nc(N2CCN(C(=O)COc3ccc(Cl)cc3)CC2)c2nc(-c3ccccn3)sc2n1	CHEMBL1652678	45.0833
29924	29924	CHEMBL1559325	COc1ccc(-c2cn3c(n2)sc2cc(C(=O)NCCCN4CCCCC4)ccc23)cc1	0	0	0	0	36.943	11.141	19.2908		1	4225403	37.0183	15.5282	21.6227												64	2147473	36.8088	11.5531	16.8778	36.8088	COc1cc(-n2cnc3cc(-c4ccc(Cl)cc4)sc3c2=O)ccc1OCC1(OC(=O)CN)CC(F)(F)C1	CHEMBL2147473	42.1096
29987	29987	CHEMBL3824279	COc1cc(-c2nn(CCN3CCC(OC)CC3)c3ncnc(N)c23)ccc1NC(=O)OC(C)(C)C	0	0	0	0	34.5063	14.4421	20.763		1	4227235	37.1141	15.556	21.7076												64	3605351	38.5078	11.9103	17.1275	38.5078	COc1ccc2nc(NC(=O)CCCCN3CCN(c4ccccc4Cl)CC3)sc2c1.Cl	CHEMBL3605351	43.7956
30091	30091	CHEMBL1731984	CC(C)c1csc(CN2CCC(CCC(=O)NCC3CCCO3)CC2)n1	0	0	0	0	10.7351	2.66028	3.97961		1	4226585	37.0414	15.5215	21.68												64	2170494	36.8822	11.8574	16.6819	36.8822	C[C@H](O)C(=O)N1CCC(CCn2c(Sc3cc4c(cc3Cl)OCO4)nc3c(N)ncnc32)CC1	CHEMBL2170494	42.1803
30135	30135	CHEMBL289166	COc1cccc2c1CC[C@H]1CN(CCn3c(=O)[nH]c4c(sc5cccc(C#N)c54)c3=O)C[C@@H]21	0	0	0	0	39.5071	12.1298	20.4023		1	3701241	37.7537	15.7293	21.5685												64	1385130	38.5635	11.8408	17.2746	38.5635	COc1cccc(-c2csc(N3CCN(CC(=O)NNC(=O)c4ccc(Cl)cc4)CC3)n2)c1	CHEMBL1385130	43.8835
30644	30644	CHEMBL2296877	COc1cccc(Sc2c(C)c(=O)[nH]c(=O)n2OCCO)c1	0	0	0	0	34.3958	26.2445	23.7805		1	3701256	37.8868	15.7117	21.7109
31394	31394	CHEMBL2046708	COc1cc2c(Sc3nccs3)ncnc2cc1OCCCN1CCOCC1	0	0	0	0	37.2751	10.0621	29.6592		1	3701238	37.7161	15.6823	21.5768
31420	31420	CHEMBL1834442	Cc1nc2nc(N3CCC(Oc4ccccc4C(F)(F)F)CC3)sc2c(=O)[nH]1	0	0	0	0	55.6349	17.5199	26.5794		1	3701237	37.7161	15.6823	21.5768
31526	31526	CHEMBL492837	COc1ccc(OC)c(Sc2c(C)[nH]c3nc(N)[nH]c(=O)c23)c1	0	0	0	0	28.4806	22.2759	20.2602		1	3701282	37.7147	15.6903	21.6345
31648	31648	CHEMBL1712253	COc1ccc2[nH]c(SCC(=O)NCc3ccc(OC)c(OC)c3)nc2c1	0	0	0	0	34.8167	29.6071	26.277		1	2180201	38.2273	16.0287	21.8582
31666	31666	CHEMBL1517074	COc1ccc(-c2nc3c(=O)n(C)c(=O)nc-3n(C)n2)cc1	0	0	0	0	52.2852	34.6568	38.3424		1	2179825	38.1278	15.9726	21.8673
31953	31953	CHEMBL1612315	COc1cccc(OCc2nn3c(=O)c(-c4ccccc4)nnc3s2)c1	0	0	0	0	46.7177	37.9291	37.905		1	3701239	37.7775	15.6766	21.7261
32000	32000	CHEMBL1287966	COc1ccc(-c2c(C)nn3c(NC(C)Cc4nc(C)no4)cc(C)nc23)c(C)c1	0	0	0	0	35.3686	21.9641	22.4691		1	2180202	38.274	16.0211	21.8758
32238	32238	CHEMBL3501750	CN1C[C@H](NC(=O)c2cscn2)[C@@H]2OCCC[C@@H]21.O=C(O)C(F)(F)F	0	0	0	0	10.4784	2.4303	4.34576		1	2179824	38.1036	15.9896	21.8561
32480	32480	CHEMBL1596983	COc1ccc(-n2c(SCCNCCO)nc3sc4c(c3c2=O)CCCC4)cc1	0	0	0	0	27.4739	20.8373	19.5302		1	3701253	37.5252	15.6467	21.6854
32769	32769	CHEMBL3442209	CN1CCN(C(=O)[C@H]2CC[C@@H]3[C@@H](CCN3Cc3nccs3)O2)CC1	0	0	0	0	12.3298	1.35509	19.1333		1	3701240	37.4793	15.5945	21.6912
32965	32965	CHEMBL1310938	C=CCn1c(SC(C)C(=O)NCc2ccc3c(c2)OCO3)nc2scc(-c3ccccc3)c2c1=O	0	0	0	0	34.5715	27.7012	26.2613		18	2346975	33.2388	14.1305	20.3434
33161	33161	CHEMBL1423660	COc1ccc(CCNc2ncnc3sccc23)cc1OC	0	2	0	0	27.7818	20.4716	32.2581		49	3675733	32.4746	13.6773	19.969
33273	33273	CHEMBL3260651	CC(C)c1cc(/C=C/C(=O)c2ccco2)cc(/C=N/c2nccs2)c1O	0	0	0	0	55.9438	17.3185	25.0344		49	3675731	33.1729	13.9712	20.3448
33843	33843	CHEMBL516362	COc1cc2ncn(-c3cc(OCCCc4ccccc4)c(C(N)=O)s3)c2cc1OC	0	0	3	0	33.9834	29.6567	26.3425		63	181470	34.2976	14.3715	20.4618
34182	34182	CHEMBL1361268	O=C(Nc1nccs1)c1ccc(-c2ccccc2Cl)o1	1	0	0	0	34.2083	32.79	22.4815		63	178262	34.0859	14.2479	20.4056
34274	34274	CHEMBL62697	COc1cc(NCc2ccc3ncnc(O)c3c2)cc(OC)c1OC	0	0	0	0	31.5542	20.1919	34.482		63	4093298	35.6911	15.2053	20.9174
34462	34462	CHEMBL1567184	O=C(Nc1nccs1)c1ccc(-c2ccc(Cl)cc2)o1	0	0	0	0	34.1772	32.7442	22.4728		64	410565	29.9715	12.848	18.5119
34466	34466	CHEMBL1611188	CCCNC(=O)Cn1cnc2sc(C(=O)Nc3ccc4c(c3)OCO4)c(C)c2c1=O	0	0	0	0	35.1981	28.4206	26.1636		64	4082905	31.5071	13.4	19.3652
34860	34860	CHEMBL298282	CCCOc1ccc(-c2ccc(C)s2)cc1-c1nc2c(c(C)nn2C)c(=O)[nH]1	0	0	0	0	49.3706	40.3904	30.0663		64	4083832	31.5028	13.4045	19.3545
35064	35064	CHEMBL13412	CC(C)n1c(=O)nc(-c2ccccc2)c2cc3c(cc21)OCO3	0	0	0	0	55.4302	19.6336	32.9032		64	3823239	32.9035	13.9732	19.7371
35182	35182	CHEMBL267055	Cn1cncc1CN1C(=O)C(N(CC(=O)NC(C)(C)C)S(=O)(=O)c2ccc3c(c2)OCCCO3)Cc2cc(C#N)ccc21	0	0	0	0	16.4614	15.4709	16.684		64	1736399	32.0549	13.7425	19.7807
35219	35219	CHEMBL361884	CC(C)[C@H](NC(=O)COc1cccc2ccccc12)C(=O)N[C@@H](CC(=O)O)C(=O)CSc1nc(-c2ccccc2)c(-c2ccccc2)[nH]1	0	0	0	0	50.8788	17.3546	18.701		64	259291	32.6073	13.7216	19.8893
35252	35252	CHEMBL1973779	COc1cc(S(=O)(=O)Nc2ccc(-c3csc(N4C(=O)C(C)SC4c4ccccc4)n3)cc2)ccc1Cl	0	0	0	0	16.8138	16.8362	13.2225		64	528845	32.7416	13.9538	19.7747
35329	35329	CHEMBL1326175	COc1cc(NC(=O)CSc2ncnc3scc(-c4ccccc4)c23)c(C(=O)O)cc1OC	0	0	0	0	34.99	28.6552	17.8116		64	3745990	33.2812	13.9366	20.1692
35576	35576	CHEMBL1374195	CCOc1ccc(CCNC(=O)c2sc3nc4n(c(=O)c3c2C)CCCC4)cc1	0	0	0	0	34.4944	27.87	22.9516		64	3823556	33.3263	14.0052	20.4528
35632	35632	CHEMBL1531021	O=C(CSc1nnc2sc3ccccc3n12)NCc1ccco1	0	0	0	0	48.0577	40.001	27.9622		64	260556	33.5325	14.111	20.1599
35670	35670	CHEMBL79560	CCCCCCCCCCCCOc1c(OC)cc(Nc2ncnc3cc(OC)c(OC)cc23)cc1OC	0	0	3	0	33.181	21.318	35.3275		64	537232	33.5093	14.0927	20.1651
35823	35823	CHEMBL1590536	COc1ccccc1C(=O)Nc1ccccc1OCc1cc(=O)n2c(C)csc2n1	0	0	0	0	34.3965	28.3339	23.1386		64	258897	33.5579	14.1329	20.1954
35856	35856	CHEMBL1390028	COc1ccc(CNC(=O)Cc2csc(Nc3nc(S)nc4ccccc34)n2)cc1	0	0	0	0	27.3105	20.3017	20.1		64	259262	33.5952	14.2485	20.2233
35920	35920	CHEMBL1440275	CCOc1ccc(-c2nnc(SCC(=O)NCc3ccc(C)cc3)nc2-c2ccc(OCC)cc2)cc1	0	0	0	0	50.6849	38.9367	31.014		64	3747458	33.8592	14.1755	20.3829
36222	36222	CHEMBL3334695	COc1ccc(/C=C/C(=O)Nc2nccs2)cc1OC	0	0	0	0	33.7276	32.181	26.5814		64	3747514	33.943	14.2167	20.2717
36263	36263	CHEMBL1314036	O=C(CSc1nc(-c2ccccc2)[nH]c1-c1ccccc1)Nc1ccc2c(c1)OCCO2	0	0	0	0	34.5953	29.3098	26.0194		64	3823506	33.844	14.1833	20.5692
36274	36274	CHEMBL4217134	CC(=O)Oc1ccc(/C=C/C(=O)Nc2nccs2)cc1OC(C)=O	0	0	0	0	34.159	32.425	26.6608		64	3822652	33.8671	14.1956	20.5501
36483	36483	CHEMBL292213	Cc1nc(Oc2ccc(Cl)cc2)sc1C(=O)N[C@H](C)[C@](O)(Cn1cncn1)c1ccc(F)cc1F	0	0	0	0	46.6624	39.3272	26.0482		64	3746247	33.9771	14.3541	20.1945
36623	36623	CHEMBL568215	Cc1ccc(Cl)c(Oc2nc3c(c(C)nc4sc5c(c43)CCCC5)c(=O)n2-c2ccccc2)c1	0	0	0	0	32.7322	25.7617	31.7346		64	3747492	34.0546	14.3561	20.2257
36642	36642	CHEMBL3197084	COc1ccc(-c2nc3ccc(Cl)cn3c2NC2CCCCC2)cc1SC1CCCCC1.O=C(O)C(F)(F)F	0	0	0	0	42.6844	13.8675	18.08		64	3746945	33.9771	14.3541	20.1945
36801	36801	CHEMBL1345395	COc1cc(OC)cc(-c2cc3nc(C4CCN(C(=O)OC(C)(C)C)CC4)cc(O)n3n2)c1	0	0	0	0	51.2407	22.9338	26.8867		64	3745745	33.9989	14.3065	20.2296
36843	36843	CHEMBL1356295	COc1ccc(-c2csc(NC(=O)C3=COCCO3)n2)c(OC)c1	0	0	0	0	34.2863	32.1916	25.5168		64	3747169	34.1003	14.3893	20.4165
36922	36922	CHEMBL209148	COc1cc(C)c(Sc2cnc(NC(=O)c3ccc(CNC(C)C(C)(C)C)cc3)s2)cc1C(=O)N1CCN(C(C)=O)CC1	0	0	3	0	34.6166	10.1461	18.7616		64	3824156	34.4361	14.5061	20.0964
36981	36981	CHEMBL1334678	CCOc1ccc(NC(=O)CSc2nc(O)cc(NS(=O)(=O)c3ccc(C)cc3)n2)cc1	0	0	0	0	26.168	22.3142	20.5229		64	3746002	34.1492	14.434	20.3377
37603	37603	CHEMBL1400542	COc1cccc(NC(=O)CN(C)C(=O)CSCc2nc(O)c3c(-c4cccs4)csc3n2)c1	0	0	0	0	51.7665	16.2276	25.2017		64	4212697	34.7356	14.6707	20.3913
37774	37774	CHEMBL35099	COc1cc2c(cc1OC)-c1cc(=Nc3ccc(C)cc3C)n(C)c(=O)n1CC2	0	0	0	0	36.7006	26.8096	29.2479		64	4212697	34.7356	14.6707	20.3913
37948	37948	CHEMBL1362766	COc1ccc(NC(=O)CN(C)C(=O)c2ccccc2Sc2ncnc3sc(C)c(C)c23)cc1	0	0	0	0	35.1059	28.306	23.5969		64	4212697	34.7356	14.6707	20.3913
38499	38499	CHEMBL1427595	O=C(Nc1ccc2c(c1)OCO2)c1c(Cl)nc2sccn12	0	0	0	0	33.2683	29.8723	20.5631		64	4212697	34.7356	14.6707	20.3913
38586	38586	CHEMBL1360306	COc1cccc(-n2cnc3scc(-c4cccs4)c3c2=O)c1	0	0	0	0	32.5572	26.0932	28.7097		64	3746108	34.655	14.6668	20.4168
38615	38615	CHEMBL1449896	COc1cc2ccccc2cc1C(=O)Nc1nccs1	0	0	0	0	33.6765	32.1693	24.2521		64	3746424	34.725	14.6952	20.6012
38631	38631	CHEMBL4093322	COc1ccccc1Cn1cnc2sc3c(c2c1=O)CCC(NCc1c(C)nn(C)c1C)C3	0	0	0	0	33.8998	20.3734	21.1269		64	3824279	34.5063	14.4421	20.763
39027	39027	CHEMBL1385764	CCn1c(SCC(=O)Nc2nc(C)c(C)s2)nnc1-c1ccco1	0	0	0	0	47.9284	39.8988	27.9039		64	3747753	34.7132	14.6015	20.7859
39100	39100	CHEMBL1592458	COc1ccc(C2C(C(=O)Nc3ccccc3)=C(C)Nc3nc(-c4ccc(Cl)cc4)nn32)cc1	0	0	0	0	36.1224	22.4609	19.1557		64	3746946	34.747	14.6873	20.7597
39183	39183	CHEMBL331026	COc1cc(/C=C(\C#N)C(N)=O)cc(CSc2nc3ccccc3[nH]2)c1O	0	0	3	0	34.682	29.4991	26.279		64	4092599	35.2431	14.7212	20.9609
39274	39274	CHEMBL1433242	O=C(CSc1nc(O)cc(-c2ccccc2)n1)NCc1ccc2c(c1)OCO2	0	0	0	0	34.997	27.5624	25.7252		64	3746306	35.3486	14.8655	20.9449
39307	39307	CHEMBL4160060	C=CC(=O)Nc1cc(Nc2ncc(Cl)c(Nc3ccccc3S(=O)(=O)N(C)C)n2)c(OC)cc1N1CCN(C)CC1	0	0	0	0	14.405	11.9192	11.3622		64	3747666	35.3656	14.9417	20.9215
40057	40057	CHEMBL1427661	COc1ccc(-n2nc(C(=O)c3cccs3)cc(-c3nc4ccccc4[nH]3)c2=N)cc1	1	0	0	0	49.192	40.1749	29.9443		64	3747494	35.3656	14.9417	20.9215
40353	40353	CHEMBL3468517	CCc1nc(CNCC2(C(N)=O)CCOCC2)cs1	0	0	0	0	9.66068	2.25676	4.09699		64	472063	35.1127	14.8505	21.091
40406	40406	CHEMBL2205531	O=C(Nc1ncc([N+](=O)[O-])s1)c1ccc(Cl)cc1O	0	0	0	0	37.4769	19.1658	14.6111		64	470146	35.4747	14.996	21.1644
40496	40496	CHEMBL4089533	COc1ccc(Cn2cnc3sc4c(c3c2=O)CCC(NCC2CCOC2)C4)c2ccccc12	0	0	0	0	37.9864	11.571	19.7521		64	472460	35.4576	15.0122	21.1233
40512	40512	CHEMBL4068463	COc1ccccc1NC1CCc2c(sc3ncn(Cc4cccc5ccccc45)c(=O)c23)C1	0	0	0	0	27.8104	21.2387	19.7039		64	511440	35.4576	15.0122	21.1233
40624	40624	CHEMBL4077658	COc1ccccc1CCNC1CCc2c(sc3ncn(Cc4cccc5ccccc45)c(=O)c23)C1	0	0	0	0	27.6621	21.0508	19.7458		64	511624	35.4747	14.996	21.1644
40665	40665	CHEMBL1430133	O=c1cc(COc2ncnc3ccccc23)nc2sccn12	0	0	0	0	32.9708	26.818	28.8308		64	469324	35.4747	14.996	21.1644
41186	41186	CHEMBL1451958	COc1ccc(-n2c(SCC(C)=O)nc3sc(C)c(C)c3c2=O)cc1	0	0	0	0	33.1537	26.0306	28.8275		64	471853	35.4282	14.9652	21.2215
41196	41196	CHEMBL184529	COc1cc2nc(N3CCN(S(=O)(=O)c4cccc(C(=O)O)c4)CC3)nc(N)c2cc1OC	0	0	0	0	15.6524	12.7501	10.3611		64	472026	35.4706	15.0639	21.1189
41282	41282	CHEMBL114327	O=C(NCCn1c(O)nc2ccccc21)OCc1cc2c(cc1Cl)OCO2	0	0	0	0	44.8516	32.8464	23.3548		64	469520	35.4576	15.0122	21.1233
41298	41298	CHEMBL1403009	Cc1cnc(NC(=O)COc2ccc3c(c2)CCC3)s1	0	2	0	0	34.1592	32.1409	25.9653		64	3746818	35.7104	15.093	20.8225
41307	41307	CHEMBL1388257	COc1ccccc1-n1cnnc1SCC(=O)c1cc(C)n(Cc2cccs2)c1C	0	0	0	0	47.5172	38.1135	38.9281		64	4216469	35.7076	15.0688	20.7578
41497	41497	CHEMBL313034	CCc1nc(N)nc(N)c1-c1ccc(Cl)c(/N=N/N(CCOC(C)=O)Cc2ccc(OC)c(OC)c2)c1	0	0	0	0	32.6629	20.5439	17.5189		64	4100099	35.7121	14.9586	20.933
41664	41664	CHEMBL473556	COc1cc2ncnc(Nc3ccc(-c4nc5ccccc5s4)cc3)c2cc1OC	0	0	3	0	27.4669	20.0968	32.013		64	511159	35.5585	15.1284	21.0508
41767	41767	CHEMBL3500971	Cc1nc(CN2C(=O)C[C@H]3[C@H]2CCN3C2CCOCC2)cs1.O=C(O)C(F)(F)F	0	0	0	0	12.6233	1.6069	16.9911		64	4117219	35.727	15.2083	20.9464
41786	41786	CHEMBL1404766	CCCSc1nc2sc3c(c2c(=O)n1-c1ccc(OC)cc1)CCN(C)C3	0	0	0	0	27.5403	21.006	24.9346		64	3746071	35.9713	15.2411	21.0248
42031	42031	CHEMBL266522	CCCn1c(=O)c2nc(-c3ccc(OCC(=O)NCCN=C(S)Nc4ccc(Br)cc4)cc3)[nH]c2n(CCC)c1=O	0	0	0	0	29.1382	18.5617	20.3175		64	3746258	35.8304	15.1747	20.9626
42139	42139	CHEMBL3213036	CCCCOc1ccc(C(=O)/N=c2\sccn2C)cc1OC	0	0	0	0	33.9674	32.0789	29.8978		64	3746490	35.928	15.1938	20.9727
42231	42231	CHEMBL2070617	COC(=O)Nc1ncc(-c2cc(-c3c(C)cc(OC)cc3C)nc(-c3cnccn3)n2)s1	0	0	3	0	33.5671	27.8884	23.804		64	3746267	36.0394	15.2655	21.0681
42364	42364	CHEMBL3915538	Nc1ncnc2c1c(-c1ccc(Oc3ccccc3)cc1)nn2C[C@@H]1CCCN1C(=O)/C=C/CN1CCOCC1	0	0	3	0	32.5829	13.6707	19.7986		64	2078877	36.3832	15.3848	21.1199
42482	42482	CHEMBL338691	CCOc1cc2ncnc(Nc3cc(-c4csc(C)n4)cc(C(F)(F)F)c3)c2cc1OCC	0	0	0	0	27.8313	20.3225	32.0438		64	4077451	36.4891	15.3371	21.3653
42541	42541	CHEMBL4101058	COc1ccc(-c2cn3c(C(=O)NCc4cn(Cc5cc(OC)c(OC)c(OC)c5)nn4)csc3n2)cc1	0	0	0	0	45.678	37.5749	31.7531		64	3746685	36.9031	15.5454	21.4097
42545	42545	CHEMBL4067264	COc1ccc(-c2cn3c(C(=O)NCc4cn(Cc5ccc(OC)c(OC)c5)nn4)csc3n2)cc1	0	0	0	0	45.8478	37.7151	31.1755		64	3747477	36.8283	15.5291	21.3325
42606	42606	CHEMBL564822	COc1ccc2cc(C(=O)Nc3ncc(Cc4cccc(C(F)(F)F)c4)s3)ccc2c1	0	0	0	0	34.9042	32.5107	24.7241		64	3747532	36.8433	15.5279	21.398
42726	42726	CHEMBL1990264	CCOC(=O)CSc1nc(N)c2c(-c3ccc(OC)c(OC)c3)c3c(nc2n1)CCCC3	0	0	0	0	27.6037	21.769	22.0688		64	3330925	36.9687	15.7512	21.4625
42762	42762	CHEMBL4065512	Nc1nc(O[C@H](c2ccc(Cl)cc2-c2ccc(S(N)(=O)=O)cc2)C(F)(F)F)cc(N2CCC3(CC2)CN[C@H](C(=O)O)C3)n1	0	0	0	0	14.5194	11.4227	10.4197		64	3330764	36.9522	15.6637	21.4571
42848	42848	CHEMBL1731237	COc1ccc2nc3c(cc2c1)c(NC(=O)CC(C)C)nn3CC(C)C	0	0	0	0	54.6876	24.5398	28.1089		64	4084897	36.5122	15.2533	21.5773
42855	42855	CHEMBL104952	C/C(=C\c1csc(C)n1)[C@@H]1C[C@H](O)[C@@](C)(O)CCC[C@H](C)[C@H](O)[C@@H](C)C(=O)C(C)(C)C(O)CC(=O)O1	0	0	0	0	5.95481	1.54848	1.56146		64	1496410	37.2095	15.5798	21.8433
42858	42858	CHEMBL20418	Cc1nnc2n1-c1sc(C#CCN3C(=O)COc4cc(F)ccc43)cc1C(c1ccccc1Cl)=NC2	0	0	0	0	47.251	37.6347	41.8454		64	2079233	37.3156	15.7353	21.5019
43147	43147	CHEMBL1456184	O=C(O)CSc1nnc(COc2cccc3cccnc23)n1-c1ccc(Cl)cc1	0	0	0	0	50.1728	40.0327	25.2028		64	1533542	38.2003	16.089	22.079
43312	43312	CHEMBL2281947	COc1ccc(/C=C2/S/C(=N\c3ccccc3)N(Cc3nc4ccccc4[nH]3)C2=O)c(OC)c1	0	0	0	0	54.3155	17.6543	25.6971		64	1940051	38.3574	16.2926	22.0974
43641	43641	CHEMBL125141	COc1cc2c(N3CCN(C(=O)Nc4ccc(OC(C)C)cc4)CC3)ncnc2cc1OCCn1cnnn1	0	0	3	0	47.2219	20.9743	26.6362		64	4212697	34.7356	14.6707	20.3913
43976	43976	CHEMBL2282477	O=C1CSC(c2c[nH]nc2-c2ccc(Cl)cc2)N1n1c(S)nnc1COc1ccc2ccccc2c1	0	0	0	0	53.8892	17.6657	22.4045
43984	43984	CHEMBL2261584	COc1ccc2nc(NC(=S)NC(=O)CNc3nc(N)nc4c3ncn4S(=O)(=O)c3ccccc3)sc2c1	0	0	0	0	24.8804	18.3114	19.1457
44076	44076	CHEMBL1542394	COc1ccc2c(C)cc(SCC(=O)Nc3nsc(-c4ccc(C)cc4)n3)nc2c1	0	0	0	0	47.4358	38.63	30.1074
44111	44111	CHEMBL547145	COc1cc(Cc2cnc(N)nc2N)c2ccsc2c1OC.Cl	0	0	0	0	27.4901	20.214	32.1869
44265	44265	CHEMBL1468868	COc1cccc(-n2nnc3c(=O)n(CC(=O)Nc4ccccc4C)cnc32)c1	0	0	0	0	49.9781	34.8437	29.963
44488	44488	CHEMBL1307987	CCOc1ccc(N(CC(=O)NCc2ccc(OC)cc2)S(=O)(=O)c2c(C)nc(O)nc2O)cc1	0	0	0	0	23.5752	20.9007	19.272
44619	44619	CHEMBL2019115	CCOc1cc(N2CCN(C)CC2)ccc1-c1nc2snc(C3CCCCC3)c2c(=O)[nH]1	0	0	0	0	39.9716	12.3936	20.5938
44624	44624	CHEMBL1896797	COc1cccc(CNc2nc3cc(-c4ccccc4)sc3c(=O)n2C)c1	0	0	0	0	28.3004	21.8104	20.1227
44905	44905	CHEMBL1883211	COc1ccc(-c2cn3c(C)c(C(=O)N4CCN(c5ccccc5)CC4)sc3n2)cc1	0	0	0	0	52.9913	15.7283	32.0441
44937	44937	CHEMBL597990	COc1cc(-c2nc3sc4c(c3c(=O)[nH]2)CCC(C)C4)ccc1OCC(=O)O	0	0	3	0	34.7781	28.8412	17.812
45020	45020	CHEMBL1570794	CCC(=O)N(CCc1ccc(OC)c(OC)c1)Cc1cc2ccc(C)cc2n2nnnc12	0	0	0	0	50.7094	35.2722	37.0564
45260	45260	CHEMBL3401101	COc1cc(-c2nc(SCc3cn(CC(=O)NC(=O)Nc4ccccn4)nn3)nc(Nc3ccc(Cl)cc3)c2C#N)cc(OC)c1OC	0	0	0	0	30.5008	19.0136	16.8222
45644	45644	CHEMBL3120199	COc1ccc(-n2c(-c3ccc(Cl)cc3)nn(C(=O)Nc3ccc(C)cc3)c2=O)cc1	0	0	0	0	60.792	40.8854	29.2091
45690	45690	CHEMBL1424490	Cc1csc2ncc(C(=O)Nc3ccc4c(c3)OCCO4)c(=O)n12	0	0	0	0	33.1565	27.2719	25.1188
45774	45774	CHEMBL3699162	COC(=O)Nc1ccc2c(c1)OCCCCC[C@H](NC(=O)/C=C/c1cc(Cl)ccc1-n1cnnn1)c1nc-2c(Cl)[nH]1	1	0	0	0	47.6755	35.5306	25.1717
45781	45781	CHEMBL1939792	COc1cc(C)c2nc3[nH]nc(C)c3c(N3CCN(C(N)=O)[C@@H](C)C3)c2c1	0	0	0	0	52.7855	23.7813	27.6439
45795	45795	CHEMBL576982	CC(C)(C)c1cc(NC(=O)Nc2ccc(-c3cn4c(n3)sc3cc(OCCN5CCOCC5)ccc34)cc2)no1	0	0	3	0	34.0803	10.1365	19.1624
45815	45815	CHEMBL109456	N=C(N)NCCCC(NC(=O)[C@@H]1CC[C@H]2CN(C(=O)CCOc3ccccc3)CC(=O)N21)C(=O)c1nccs1	1	0	0	0	34.2241	9.79332	18.7783
45820	45820	CHEMBL3196516	CCCOc1ccc(CCC(=O)N/N=C/c2c(C)nc(O)nc2O)cc1	0	0	0	0	51.9247	37.1157	31.0765
45837	45837	CHEMBL521749	COc1cc(C(=O)Nc2ccccc2-c2cn3ccsc3n2)cc(OC)c1OC	0	0	0	0	33.3498	29.4336	26.844
45917	45917	CHEMBL404739	Cc1ccc(-c2nc(NC(=O)COc3ccccc3F)cc(-c3nccs3)n2)o1	0	0	0	0	33.5176	27.9646	22.017
46024	46024	CHEMBL1719208	COc1ccc(Cc2nnc(SCC(=O)Nc3ccccc3)nc2O)cc1	0	0	0	0	51.1617	38.9543	31.1709
46141	46141	CHEMBL4068607	COc1ccc2ccccc2c1Cn1cnc2sc(CCN)c(C)c2c1=O	0	0	0	0	27.6531	20.9926	19.7494
46326	46326	CHEMBL1391346	O=C(CSc1nc(C2CCCCC2)nc2ccccc12)NCc1ccc2c(c1)OCO2	0	0	0	0	54.1684	17.31	27.638
46786	46786	CHEMBL1475738	CCOc1ccc(NC(=O)CCc2c(C)nc3cc(-c4ccccc4OC)nn3c2C)cc1	0	0	0	0	50.6034	36.0455	30.2463
46809	46809	CHEMBL1366690	CCc1c(C)nc(N)n2c(SCC(=O)Nc3ccccc3OC)nnc12	0	0	0	0	34.8374	20.8425	22.6227
46879	46879	CHEMBL4175076	COc1cc(/C=N/Nc2nccs2)c2c(c1OCC#N)CN1CCc3cc4c(cc3C1C2)OCO4	0	0	0	0	33.2016	18.7084	33.3496
46893	46893	CHEMBL1718432	COc1ccc2cc(C)c3nnc(SCC(=O)Nc4nc(-c5ccc(F)cc5)cs4)n3c2c1	0	0	0	4	47.0288	38.7135	29.9986
46927	46927	CHEMBL595373	COc1cc2c(Oc3ccc(-c4nc5ccccc5s4)cc3)ncnc2cc1OCCCN1CCCC1	0	0	3	0	35.6182	9.52036	28.6697
47227	47227	CHEMBL4066097	COc1cccc(-c2nc3sc4c(c3c(=O)[nH]2)CCCC4)c1	0	0	0	0	32.016	25.6639	22.2368
47263	47263	CHEMBL375461	CC(=O)Nc1nc2c(Oc3cc(N4CCOCC4)ncn3)cccc2s1	0	0	0	0	54.296	16.8779	26.9577
47373	47373	CHEMBL287312	COC(=O)C(CSc1ccc(OC)cc1)n1c(=O)n2n(c1=O)C(C(=O)NCc1ccc(N)nc1C)C=CC2	1	0	0	0	31.0131	18.7503	21.0641
47401	47401	CHEMBL3193733	COc1ccc(/C=N/NC(=O)c2nc(-c3ccccc3)cc(-c3ccccc3)n2)cc1OC	0	0	0	0	51.4748	35.5814	32.289
47424	47424	CHEMBL2046884	C#Cc1cccc(NC(=O)Nc2nnc(Sc3ncnc4cc(OCCCN5CCOCC5)ccc34)s2)c1	0	0	3	0	34.6685	10.3663	19.5812
47644	47644	CHEMBL2017614	Cc1nc(NCCNS(C)(=O)=O)nc2ccc(NC(=O)/C=C/c3ccc(OC(F)(F)F)cc3)cc12	0	0	0	4	25.333	19.1305	19.1303
47674	47674	CHEMBL1398505	CCOc1ccc2nc(NC(=O)CS(=O)(=O)c3ccc(Cl)cc3)sc2c1	0	0	0	0	29.7408	28.7613	19.3397
47810	47810	CHEMBL1432253	COc1ccccc1CNC(=O)CSc1nn2c(=O)c(C(C)(C)C)nnc2s1	0	0	0	0	53.9374	17.3637	26.0441
48284	48284	CHEMBL1460269	CCc1ccccc1NC(=O)CSc1nc2nnc(C)c-2c(N)n1-c1cccc(OC)c1	0	0	0	0	35.0173	20.9595	22.4272
48394	48394	CHEMBL1940051	COc1cc(C)c2nc3[nH]nc(C)c3c(CN3CCNC(=O)C3)c2c1	0	0	0	0	38.3574	16.2926	22.0974
48474	48474	CHEMBL3604941	C=CC(=O)Nc1cccc(Oc2nc(Nc3n[nH]c4ccccc34)cc(N3CCN(C(C)=O)CC3)n2)c1	0	0	3	0	35.0883	14.9776	20.714
48723	48723	CHEMBL1549784	COc1ccc(OC)c(S(=O)(=O)N2Cc3ccccc3CC2C(=O)Nc2nccs2)c1	0	0	0	0	28.9574	28.1809	22.0002
48778	48778	CHEMBL1382107	COc1ccc(-n2nnc3c(=O)n(Cc4cc(C)ccc4C)cnc32)cc1	0	0	0	0	50.1516	33.9819	37.5154
48839	48839	CHEMBL4101560	COc1cc(Cn2cc(CNC(=O)c3csc4nc(-c5ccc(F)cc5)cn34)nn2)cc(OC)c1OC	0	0	0	0	45.8468	37.7112	31.8114
48847	48847	CHEMBL1355049	COc1cc(-c2nc(SCC(=O)Nc3ccc(C)cc3)c(-c3ccc(F)cc3)[nH]2)cc(OC)c1OC	0	0	0	0	34.1122	28.931	26.1583
48872	48872	CHEMBL1479735	COc1ccc(OC)c(NC(=O)CSc2nnc3ccc4ccccc4n23)c1	0	0	0	0	50.4014	39.3933	31.3215
49390	49390	CHEMBL4062705	CC(C)(Oc1ccc(Cl)cc1)C(=O)Nc1ncc([N+](=O)[O-])s1	0	0	0	0	38.4283	18.1814	18.8372
50168	50168	CHEMBL1580885	COc1ccc(-n2c(SCC(=O)N(C)c3ccccc3)nc3c4ccccc4nc-3c2O)cc1OC	0	0	0	0	34.1317	28.5573	25.8474
50297	50297	CHEMBL528817	COc1ccc(NC(=O)CCNc2cc(C)nc(NCc3ccccc3C)n2)cc1.O=C(O)C(F)(F)F	0	0	0	0	29.8548	20.3142	20.7579
50431	50431	CHEMBL1324484	COc1ccccc1-n1cnc2sc(-c3ccccc3)cc2c1=O	0	0	0	0	32.671	26.1955	28.9185
50523	50523	CHEMBL1518265	CCOc1ccc2nc(N3C(=O)/C(=C/c4ccc(Cl)cc4)NC3=S)sc2c1	0	0	0	0	29.0045	21.9538	17.5838
50570	50570	CHEMBL1423014	COc1cccc(-n2c(SCC(=O)N3CCOCC3)nc3c4ccccc4nc-3c2O)c1	0	0	0	0	54.2167	17.785	26.4035
50604	50604	CHEMBL227259	CC(=O)Nc1nc2c(Oc3cc(N4CCN(Cc5ccccc5)CC4)ncn3)cccc2s1	0	0	0	0	37.4517	11.266	20.429
50677	50677	CHEMBL3287112	O=C(O)/C(Cc1ccccc1[N+](=O)[O-])=N/Nc1nc2c(s1)COc1cc(Cl)c(Cl)cc1-2	0	0	0	0	35.6737	18.1455	16.7786
50701	50701	CHEMBL3287113	O=C(O)/C(Cc1ccccc1[N+](=O)[O-])=N\Nc1nc2c(s1)COc1cc(Cl)c(Cl)cc1-2	0	0	0	0	35.6737	18.1455	16.7786
50718	50718	CHEMBL1887599	COc1ccc(NC(=O)Cn2cnc3sc(C)c(S(=O)(=O)N4CCOCC4)c3c2=O)c(OC)c1	0	0	0	0	17.0849	15.7256	15.1886
50881	50881	CHEMBL1202684	COc1ccccc1N1CCN(CCn2c(=O)[nH]c3scc(C)c3c2=O)CC1.Cl.O	0	0	0	0	40.9549	12.6581	20.8689
51145	51145	CHEMBL4172419	C=CCOc1c(OC)cc(/C=N/Nc2nccs2)c2c1CN1CCc3cc4c(cc3C1C2)OCO4	0	0	0	0	33.2476	18.7047	33.3424
51398	51398	CHEMBL361476	COc1ccc2c(c1)OC(=O)CC2CC(=O)Nc1nc(CC(=O)NO)cs1	0	0	0	0	36.4272	33.7693	25.8341
52086	52086	CHEMBL4085711	CCc1ccc(Oc2cc(N3CCC(C(=O)N4CCc5ccccc5C4)CC3)ncn2)cc1	0	0	0	0	51.6106	17.8397	32.0519
52616	52616	CHEMBL42997	CCOc1cc(Nc2cccc(C)c2C)nc(SCC(=O)NCCO)n1	0	0	0	0	26.6675	20.7314	20.6736
52624	52624	CHEMBL1915238	COc1cc(C(=O)c2sc(N3CCOCC3)nc2N)cc(OC)c1OC	0	0	0	0	42.347	12.5094	24.0258
52900	52900	CHEMBL1241481	COc1cc(-c2nn(C(C)C)c3ncnc(N)c23)ccc1NC(=O)OC(C)(C)C	1	0	3	0	39.0663	16.4364	22.2434
52992	52992	CHEMBL302299	COc1cc2c(NCc3ccc4c(c3)OCO4)ncnc2c(OC)c1OC	0	0	0	0	32.8244	21.0062	34.2036
53033	53033	CHEMBL1338319	COc1ccc(-n2c(=O)c3sc4ccccc4c3n(C)c2=O)cc1	0	0	0	0	32.7977	26.3491	28.7751
53176	53176	CHEMBL1518916	CC(=O)Nc1ccc2nc(NC(=O)COc3ccccc3Cl)sc2c1	0	0	0	0	35.3334	32.5272	21.6253
53341	53341	CHEMBL2312159	Cc1c(Oc2ccc(-n3cnnn3)cc2F)ncnc1N1C2CC3CC1CC(C2)N3C(=O)OC(C)(C)C	0	0	0	4	47.8981	20.9976	31.4489
53643	53643	CHEMBL102000	COc1cc(Nc2ncnc3c2Cc2cc(OC)c(OC)cc2N3)c(Cl)cc1Cl	0	0	3	0	31.3672	19.5617	39.593
53695	53695	CHEMBL1350452	CC(C)OCc1c(C(=O)Nc2nccs2)oc2ccccc12	0	0	0	0	57.1702	17.874	25.0574
54093	54093	CHEMBL115444	O=C(OCc1cc2c(cc1Cl)OCO2)N1CCC(n2c(O)nc3ccccc32)CC1	0	0	0	0	50.6469	19.6288	21.354
54108	54108	CHEMBL379626	COc1ccc(-n2c(C)nnc2SCC(=O)Nc2ccc(S(N)(=O)=O)cc2Cl)c2ccccc12	0	0	0	0	25.3101	24.6396	16.9631
54164	54164	CHEMBL475009	COc1ccc(-n2c(-c3ccccc3)cs/c2=N\C(=O)c2cc(=O)[nH]c(=O)[nH]2)cc1	0	0	0	0	34.578	28.5405	23.6049
54307	54307	CHEMBL3754229	COc1ccc(C(=O)Nc2nc(-c3cccs3)nc3cn(-c4ccccc4)nc23)cc1	0	0	0	0	48.9308	39.8283	29.843
54522	54522	CHEMBL559057	CCS(=O)(=O)c1ccc(Oc2cc3nc(-c4ccccn4)[nH]c3cc2C2CCCN2C(C)=O)cc1	0	0	0	0	17.1534	15.9566	16.1181
54693	54693	CHEMBL562737	COc1cccc(C(=O)Nc2ncc(Cc3cccc(C(F)(F)F)c3)s2)c1	0	0	0	0	34.0251	32.1354	24.3529
54759	54759	CHEMBL101204	CCn1cnc2nc(Nc3nc(C)cs3)nc(NCc3ccc(OC)c(OC)c3)c21	0	0	0	0	27.0976	19.4732	31.4815
55026	55026	CHEMBL1468807	O=c1cc(COc2ncnc3c(Cl)cc(Cl)cc23)nc2sccn12	0	0	0	0	32.7854	26.5445	31.6879
55347	55347	CHEMBL1558102	Cc1ccc(C(=O)Nc2ncc(Cc3ccccc3)s2)o1	0	0	0	0	33.8107	32.1975	22.8292
55553	55553	CHEMBL250931	CCOc1ccc(-n2c(SCC#N)nc3sc(C)c(C)c3c2=O)cc1	0	0	0	0	33.2349	26.1493	29.0375
55714	55714	CHEMBL1489386	COc1ccccc1NC(=O)c1sc2ncn(Cc3cccc4ccccc34)c(=O)c2c1C	0	0	0	0	34.3045	27.8226	23.1809
55773	55773	CHEMBL1373530	COc1ccc(C)cc1NC(=O)c1sc2nc(C)nc(N3CCOCC3)c2c1C	0	0	0	0	54.9871	17.494	25.2094
55804	55804	CHEMBL77315	Cc1cc(C)cc(Sc2c(C(C)C)c(=O)[nH]c(=O)n2OCCOc2ccccc2)c1	0	0	0	0	57.3987	18.7544	26.8577
55943	55943	CHEMBL3911303	COC(=N)c1nc2ccc3ncnc(N(C)c4ccc(OC)c(OC)c4)c3c2s1	0	0	3	0	32.7298	25.9069	37.8994
55951	55951	CHEMBL2386753	COC(=N)c1nc2ccc3ncnc(Nc4ccc5c(c4)OCO5)c3c2s1	0	0	3	0	27.0421	19.5461	30.9504
56090	56090	CHEMBL1986660	CCCCNc1c(-c2ccc(OC)c(SC3CCCCC3)c2)nc2ccc(Cl)cn12.O=C(O)C(F)(F)F	0	0	0	0	43.0153	13.9789	18.1885
56169	56169	CHEMBL3747753	NCC(=O)N1CC[C@@H](n2nc(-c3ccc(Oc4ccccc4)cc3)c3c(N)ncnc32)C1	0	0	0	0	34.7132	14.6015	20.7859
56445	56445	CHEMBL1491279	COc1ccc(NC(=O)c2sc3ncnc(N4CCN(c5ccccn5)CC4)c3c2C)cc1Cl	0	0	0	0	53.6735	17.3726	22.2908
56465	56465	CHEMBL1578386	COc1ccc(-c2cc(C(F)(F)F)nc(S(=O)(=O)CCCC(=O)Nc3cc(C)on3)n2)cc1OC	0	0	0	0	25.5353	24.2206	22.1126
56507	56507	CHEMBL3954629	Cc1nc(OC[C@@H]2CN(C(=O)OC(C)(C)C)CCO2)sc1S(=O)(=O)NC(=O)c1ccc(N2CCN(CC3=C(c4ccc(Cl)cc4)CC(C)(C)CC3)CC2)cc1Oc1cccc2[nH]cnc12	0	0	0	0	12.0842	8.88487	11.237
56868	56868	CHEMBL2140124	COc1ccc(CCNC(=O)CSc2nc(O)c3sc(=S)n(-c4ccccc4)c3n2)cc1OC	0	0	0	0	35.3182	28.2353	25.9046
56916	56916	CHEMBL1866357	O=C(Nc1nc2c(Cl)cccc2s1)C1COc2ccccc2O1	1	0	0	0	33.1292	31.1593	20.9884
57191	57191	CHEMBL1306557	COc1ccc(-c2csc(NC(=O)CCS(=O)(=O)c3ccccc3)n2)c(OC)c1	0	0	0	0	28.6729	27.8121	22.0883
57389	57389	CHEMBL241809	COc1ccccc1C1SCC(=O)N1NCc1nc2ccc(Br)cc2c(=O)n1-c1nc(-c2ccc(Cl)cc2)cs1	0	0	0	0	54.4326	17.5406	22.6953
57651	57651	CHEMBL1706637	CN(C)CCCN(C(=O)COc1ccccc1)c1nc(CC(=O)Nc2ccc(Cl)cc2)cs1.Cl	0	0	0	0	28.0435	20.827	17.032
57818	57818	CHEMBL1382233	COc1ccc(-c2cnc(SCC(=O)Nc3nc(C(C)(C)C)cs3)n2Cc2ccco2)cc1	0	0	0	0	53.0043	16.5964	23.9644
57924	57924	CHEMBL415049	CCN(CCCOc1ccc2c(Nc3cc(CC(=O)Nc4cccc(F)c4)[nH]n3)ncnc2c1)CCOP(=O)(O)O	0	0	3	4	29.0136	18.0807	19.8747
58000	58000	CHEMBL268758	COc1ccccc1N1CCN(CCn2c(=O)[nH]c3scc(-c4ccccc4)c3c2=O)CC1	0	0	0	0	40.31	12.4707	20.4979
58005	58005	CHEMBL1209759	C[C@@H](Oc1cc(-n2cnc3cc(-c4cn[nH]c4)ccc32)sc1C(N)=O)c1ccccc1C(F)(F)F	0	0	3	0	46.9721	38.6265	28.8653
58027	58027	CHEMBL567056	Cc1ccc(-c2cnc(N(CCCOc3ccccc3)Cc3ccc(C(=O)NO)cc3)s2)cc1	0	0	0	0	36.9561	33.9313	25.3674
58148	58148	CHEMBL466731	COc1cccc(-c2c(C)n(Cc3c(F)cccc3S(C)(=O)=O)c(=O)n(C[C@H](N)c3ccccc3)c2=O)c1F	0	0	0	0	25.9932	20.3843	19.0669
58191	58191	CHEMBL13449	CC(C)n1c(=O)nc(-c2cccc([N+](=O)[O-])c2)c2cc3c(cc21)OCO3	0	0	0	0	37.3943	16.9384	25.6555
58275	58275	CHEMBL1088125	COc1ccc(C2SCC(=O)N2NC(=O)CSc2nc3ccccc3[nH]2)cc1	0	0	0	0	53.5294	17.3043	25.9668
58309	58309	CHEMBL1516606	CCc1ccccc1OCCSc1nc(-c2cccs2)nc2cc(=O)[nH]n12	0	0	0	0	49.3731	39.8957	30.8822
58316	58316	CHEMBL1368609	Clc1ncnc2scc(C3COc4ccccc4O3)c12	0	0	0	4	31.3175	24.3671	31.1958
58454	58454	CHEMBL1726204	NC(=O)C1CCN(c2ncc(-c3ccc4c(c3)OC(F)(F)O4)s2)CC1	0	0	0	0	54.9123	16.7869	27.5714
58488	58488	CHEMBL3976573	COc1cc(C)cc2cc(-c3c(CNC(C)=O)c(CN4CCNC(=O)C4)n4ncnc(N)c34)sc12	0	0	3	0	38.8305	11.8622	20.6246
58612	58612	CHEMBL1604257	O=C(CN(Cc1ccco1)C(=O)CCC(=O)Nc1nccs1)NCc1ccccc1	0	0	0	0	37.2318	34.371	24.2157
58727	58727	CHEMBL1409847	COc1ccccc1N1CCN(C(=O)CSc2ncnc3scc(-c4ccccc4)c23)CC1	0	0	0	0	53.6034	16.2909	31.9492
58766	58766	CHEMBL392761	COc1ccc(/C=N/NCc2nc3ccc(Br)cc3c(=O)n2-c2nc(-c3ccc(Cl)cc3)cs2)cc1	0	0	0	0	47.2162	39.4276	26.2834
58911	58911	CHEMBL1511184	COc1ccc(CCN2CC(=O)C(c3nc(O)c4ccccc4n3)=C2N)cc1OC	0	0	0	0	30.8628	20.819	22.7692
59147	59147	CHEMBL3499369	CN1C(=O)CCCC12CCCN(Cc1nccs1)C2.O=C(O)C(F)(F)F	0	0	0	0	13.3033	1.57139	19.4186
59324	59324	CHEMBL1568535	OCCN1CCN(C(c2ccc(Cl)cc2Cl)c2sc3nc(-c4ccco4)nn3c2O)CC1	0	0	0	0	38.1324	11.8468	17.8278
59453	59453	CHEMBL1713257	CCOc1ccc(CCNC(=O)c2sc3nc4n(c(=O)c3c2C)CCC4)cc1	0	0	0	0	34.4083	27.8889	22.9246
60238	60238	CHEMBL1401524	O=C(CSc1nc(-c2cccc(F)c2)[nH]c1-c1ccccc1)Nc1ccc2c(c1)OCCO2	0	0	0	0	34.6485	29.3338	26.0426
60241	60241	CHEMBL1523703	COc1cccc(CC(=O)Nc2nc(C)cs2)c1	0	0	0	0	33.4493	32.0051	24.7916
60279	60279	CHEMBL82538	NC(=O)N(O)Cc1cccc(OCc2csc(-c3ccc(Cl)cc3)n2)c1	0	0	0	0	37.0538	34.866	22.6049
60422	60422	CHEMBL1361871	COc1ccc(CCNC(=O)CSc2cc(O)nc(N)n2)cc1OC	0	0	0	0	26.8505	20.7776	21.221
60427	60427	CHEMBL1504670	COc1cccc(N2CCN(C(=O)CCCCCNc3nc(S)nc4ccccc34)CC2)c1	0	0	0	0	36.0548	11.3788	19.9335
60531	60531	CHEMBL108358	NC(=O)c1csc([C@@H]2O[C@H](CO)[C@@H](O)[C@H]2O)n1	0	0	0	0	7.98684	1.87691	2.56464
60741	60741	CHEMBL1415631	Cc1sc2ncnc(OCC(=O)N3CCN(S(=O)(=O)c4ccc(Cl)cc4)CC3)c2c1C	0	0	0	0	17.2874	15.3977	20.5652
60854	60854	CHEMBL3702839	CN(C1COC1)C(C)(C)/C=C(\C#N)C(=O)N1CCC[C@@H](n2nc(-c3ccc(Oc4ccccc4)cc3F)c3c(N)ncnc32)C1	0	0	3	0	32.0981	13.4782	19.4736
60950	60950	CHEMBL1497835	COc1ccc(CC(=O)Nc2ccc(S(=O)(=O)Nc3nccc(C)n3)cc2)cc1	0	0	0	0	23.5397	20.7714	18.6319
61169	61169	CHEMBL1536658	CCN(CC)C(=O)CSc1nc2c(sc(=S)n2Cc2ccco2)c(=O)n1-c1ccccc1	0	0	0	0	34.3431	27.2804	30.729
61603	61603	CHEMBL229219	COc1ccc(-c2cc(C(=O)c3cccs3)c3c(=O)[nH]c(=S)[nH]c3n2)cc1	0	0	0	0	32.6424	26.1943	22.2939
61695	61695	CHEMBL560463	COc1ccccc1NC(=O)C(C)Sc1nc(-c2ccc(C)cc2)nc2c1COC(C)(C)C2	0	0	0	0	55.6941	18.0493	26.5793
61783	61783	CHEMBL3260654	CCCc1cc(/C=C/C(=O)c2ccc(OC)cc2)cc(/C=N/c2nccs2)c1O	0	0	0	0	35.6281	33.6261	25.2479
61827	61827	CHEMBL1980744	CCOC(=O)/C(=N\Nc1ncnc2ccccc12)c1ccc(OC)cc1	1	0	0	0	52.9458	36.5091	30.5999
61909	61909	CHEMBL1835918	Cc1ccc(N2CC(COc3ccc(-c4noc(C)n4)cc3)C2)nn1	0	2	0	0	50.0758	23.487	33.3052
62028	62028	CHEMBL1422896	CCC(=O)Nc1ccc(OCc2nnc3c4ccccc4c(C)nn23)cc1	0	0	0	0	51.6641	36.1291	30.9923
62120	62120	CHEMBL1172019	CCCCC(Sc1nc(OCCCc2ccccc2)cc(OCCCc2ccccc2)n1)C(=O)O	0	2	0	0	34.4254	27.0325	17.8064
62712	62712	CHEMBL1612751	COc1ccc(C(=O)NCc2cn3ccsc3n2)cc1OC	0	0	0	0	32.9978	29.0402	26.0849
63279	63279	CHEMBL4060687	COc1ccc(CNc2nc(NC(N)=O)nc3ccccc23)cc1OC	1	0	0	0	31.8031	21.4644	23.0415
63322	63322	CHEMBL4129951	COc1cccc(-c2nc(SC(C(N)=O)c3nc(-c4ccc(C)cc4)cs3)[nH]c(=O)c2C#N)c1	1	0	0	0	34.3927	27.6542	23.3692
63360	63360	CHEMBL1783876	C#CCNc1ccnc2sc3c(=O)n(-c4ccc(OC)cc4)cnc3c12	0	0	0	0	28.3801	21.7531	20.1539
63422	63422	CHEMBL1349863	COc1cc(SC)ccc1C(=O)Nc1ncc(C)s1	0	0	0	0	32.9874	31.4391	23.8297
63437	63437	CHEMBL1800156	COCCN(C)Cc1c(-c2ccc(NC(=O)NOC)cc2)sc2c1c(=O)n(-c1ccc(OC)nc1)c(=O)n2Cc1c(F)cccc1F	0	0	0	0	26.8477	20.0966	19.2084
63460	63460	CHEMBL552596	COc1cc2nc(N3CCC(C(=O)c4cccs4)CC3)nc(N)c2cc1OC.Cl	0	0	0	0	41.355	12.4807	23.3996
63635	63635	CHEMBL4126826	Cc1ccc2c(c1)C=Cc1cc(C)ccc1C2c1cn(Cc2cc(C(=O)NCCNC(=O)COc3ccc(/C=C/C4=[N+]5C(=Cc6ccc(-c7cccs7)n6[B-]5(F)F)C=C4)cc3)cc(C(=O)Nc3nnn[nH]3)c2)c(=O)[nH]c1=S	0	0	0	0	27.3268	16.8542	18.0994
63646	63646	CHEMBL3209253	CCOC(=O)C1=C(C)N=c2s/c(=C/c3cccc(OCC(=O)O)c3)c(=O)n2C1c1ccc(F)cc1	0	0	0	0	37.8719	35.3719	20.7025
63733	63733	CHEMBL1800788	CCC1CN2C(=O)N(Cc3ccccc3)c3nc(-c4cc(OC)nn4C)[nH]c3C2=N1	0	0	0	0	50.5682	34.6577	30.2868
63858	63858	CHEMBL1381918	CC(C)(C)C(=O)Nc1nc(-c2ccc3c(c2)OCO3)cs1	0	0	0	0	58.207	17.7962	29.0705
63912	63912	CHEMBL1373541	CCN(CC)CC.COc1ccccc1-n1c(=S)[nH]c2c(sc(=S)n2-c2ccc(C)cc2C)c1=O	0	0	0	0	33.172	26.9311	23.6393
63993	63993	CHEMBL1316354	COc1cc(SC)ccc1C(=O)Nc1nc(C)cc(C)n1	0	0	0	0	32.9988	25.5683	22.423
64166	64166	CHEMBL212583	Cc1nc(COc2ccc(-c3nc4cc(C(=O)O)ccc4n3C3CCCCC3)cc2)c(-c2ccc(Cl)cc2)s1	0	0	0	0	52.1238	16.9219	20.1842
64444	64444	CHEMBL1824074	COc1cccc(NC(=O)Nc2cccc(Oc3ncnc4cc(OC)c(OC)cc34)c2)c1	0	0	3	0	37.2639	28.1982	26.5126
64492	64492	CHEMBL1824073	COc1cc2ncnc(Oc3cccc(NC(=O)Nc4cccc(C(C)(C)C)c4)c3)c2cc1OC	0	0	3	0	50.7255	18.0288	27.2797
64517	64517	CHEMBL1354441	COc1ccc(NC(=O)CSc2cc(-c3ccccc3)nc(C)n2)cc1	0	0	0	0	34.0052	26.5608	23.7723
65141	65141	CHEMBL3449939	COc1ncccc1C(Cc1ccsc1)NC(=O)Cn1cccnc1=O	0	0	0	0	33.5058	27.2998	23.994
65203	65203	CHEMBL1375494	CCN1CCN(c2nc3sc4c(c3c(=O)n2-c2ccc(OC)cc2)CCCCC4)CC1	0	0	0	0	41.7279	12.2511	26.5096
65408	65408	CHEMBL409919	CCOC(=O)c1sc(Nc2nc(NCc3cc(OC)c(OC)c(OC)c3)c3c(ncn3CC)n2)nc1C	0	0	0	0	27.8762	20.9182	22.0709
65593	65593	CHEMBL7493	COc1ccc(-c2nnc3n(C)c4ccccc4n3c2=O)cc1	0	0	0	0	51.0982	33.8071	37.9961
65648	65648	CHEMBL2142433	CCC(C)Sc1cc(-c2nc3ccc(Cl)cn3c2NC2CCCCC2)ccc1OC.O=C(O)C(F)(F)F	0	0	0	0	42.8914	13.9322	18.1253
65816	65816	CHEMBL1795814	O=c1n(-c2nccs2)cnn1CC(O)(Cn1cncn1)c1ccc(F)cc1F	0	0	0	0	47.8557	40.8367	17.8155
65991	65991	CHEMBL1321630	COc1cccc(-c2nc(SCC(=O)N3CCc4ccccc43)c3c(=O)n(C)c(=O)n(C)c3n2)c1	0	0	0	0	34.8901	27.4334	29.7041
66006	66006	CHEMBL4071105	COc1cc(CCNC=O)c(C)cc1Nc1ncc(Cl)c(Nc2ccccc2S(=O)(=O)C(C)C)n1	0	0	3	0	14.1417	11.7852	11.3108
66212	66212	CHEMBL3210759	CCOc1ccc(/C=N/n2c(SC)nnc(C(C)(C)C)c2=O)cc1	0	0	0	0	57.2772	17.983	34.0558
66513	66513	CHEMBL1719997	COc1ccc2c(c1)cc(C)c1nnc(SCC(=O)Nc3nc(C)cs3)n12	0	0	0	4	47.5995	39.189	30.3208
66637	66637	CHEMBL1448498	COc1ccc(OC)c(-c2csc(N(CC3CCCO3)C(=O)Cc3ccccc3)n2)c1	0	0	0	0	53.9494	15.7517	32.2042
66711	66711	CHEMBL1476900	Cc1cc(OCC(=O)Nc2cc(-c3nc4ccccc4[nH]3)ccc2C)ccc1Cl	0	0	0	0	43.7277	31.8638	23.3988
67033	67033	CHEMBL1518345	CC(C)(C)c1ccc(C(=O)Nc2ccc(OCc3cc(=O)n4ccsc4n3)cc2)cc1	0	0	0	0	53.4194	16.7789	24.764
67174	67174	CHEMBL1185703	O=C(O)C(=O)Nc1nc(-c2ccc3c(c2)OCCO3)cs1	0	0	0	0	35.1316	33.2296	19.0364
67370	67370	CHEMBL1278235	COc1cc2ncnc(N(C)c3ccc(NC(=O)Nc4ccccc4)cc3)c2cc1OC	0	0	3	0	38.09	28.3987	26.8464
67440	67440	CHEMBL1481469	COc1ccc(CN(CC(=O)NCc2ccccc2)C(=O)CCC(=O)Nc2nccs2)cc1	0	0	0	0	37.0129	33.893	26.4177
67719	67719	CHEMBL1358504	COc1ccccc1NC(=O)c1sc2ncn(Cc3ccccc3Cl)c(=O)c2c1C	0	0	0	0	34.297	28.033	20.508
67793	67793	CHEMBL43909	COc1cccc2c1CC[C@H]1CN(CCn3c(=O)[nH]c4c(sc5ncc(-c6ccccc6)nc54)c3=O)C[C@@H]21	0	0	0	0	38.1618	11.6736	19.9047
67796	67796	CHEMBL152739	COc1cc2ncnc(Nc3cccc(Cl)c3)c2cc1OC.Cn1nnc2c(C(O)O)ncn2c1=O	0	0	0	0	36.7815	23.5289	19.3224
67826	67826	CHEMBL597618	O=C(Nc1cccc(Oc2cccc3[nH]c(=O)[nH]c23)c1)c1ccc2sccc2c1	0	0	3	0	35.6782	31.1825	23.9623
67854	67854	CHEMBL3213079	COc1ccccc1/C=N/NC(=O)C(C)Cn1cnc2ccccc21	0	0	0	0	49.8208	34.3669	29.8182
67930	67930	CHEMBL1760640	CNCCOc1cc(Cl)c(C)cc1NC(=O)NCCc1ccc2nc(NC(C)=O)[nH]c2c1	0	0	3	0	29.4974	19.2938	16.7809
68002	68002	CHEMBL1423017	CC(=O)c1ccc(Oc2ncnc3sccc23)c(CN2CCOCC2)c1	0	0	0	0	41.1705	11.9734	26.6546
68166	68166	CHEMBL1383537	COc1ccc(-c2csc(N3C(=N)SCC3=O)n2)cc1	0	0	0	0	57.5627	17.7669	27.1576
68555	68555	CHEMBL1468668	COc1ccc2c(c1)sc1nc(=O)c(-c3c(C)cc(C)cc3C)c(O)n12	0	0	0	0	32.321	26.5966	22.5503
68768	68768	CHEMBL2312158	Cc1c(Oc2ccc(-n3cnnn3)cc2F)ncnc1N1C2CC3CC1CC(C2)N3C(=O)OC1(C)CC1	0	0	0	4	47.7115	20.8911	31.4056
68842	68842	CHEMBL2312110	COc1ccc(-c2cc(NC(C)=O)nc(-c3ccc(OC)c(OC)c3)n2)cc1OC	0	0	0	0	36.0661	26.1573	25.8222
69270	69270	CHEMBL4083279	COc1ccc(-c2[nH]c(=O)nc3nc(Nc4ccc(S(N)(=O)=O)cc4)sc23)cc1	0	0	0	0	25.1241	19.4654	18.8275
69386	69386	CHEMBL246059	COc1ccc(-n2c(SCC#N)nc3sc4ccccc4c3c2=O)cc1	0	0	0	0	33.1143	26.2066	28.8239
69493	69493	CHEMBL1357441	CC(C)(C)c1ccc(-c2nc(SCCCOc3ccccc3)n3[nH]c(=O)cc3n2)cc1	0	0	0	0	56.0029	18.0146	26.5696
69545	69545	CHEMBL100152	CC(C)(C)c1nc(OCC(=O)O)c(C#N)c(SCc2ccccc2)n1	0	0	0	0	57.9451	19.6293	21.4785
69692	69692	CHEMBL1435877	Cc1cn2c(=O)cc(COc3ccccc3NC(=O)c3ccc(C(C)(C)C)cc3)nc2s1	0	0	0	0	53.9993	16.9715	24.9505
69796	69796	CHEMBL465923	Cn1c(Sc2c[nH]c3cccc(OCC(=O)NS(=O)(=O)c4cc(Cl)c(Cl)s4)c23)nc2ccccc21	0	0	0	0	27.4649	25.1587	17.807
69808	69808	CHEMBL257198	C[C@H](Oc1cccc2ncnc(Nc3ccc4c(cnn4Cc4nccs4)c3)c12)C(=O)N(C)C	0	0	3	0	34.5264	20.6064	22.3325
69828	69828	CHEMBL257196	C[C@@H](Oc1cccc2ncnc(Nc3ccc4c(cnn4Cc4cscn4)c3)c12)C(N)=O	0	0	3	0	32.8894	19.7351	21.7173
69902	69902	CHEMBL1311043	COc1ccccc1CNC(=O)CSc1nnc2c(Cl)cc(C(F)(F)F)cn12	0	0	0	0	50.5735	40.2112	26.8853
70163	70163	CHEMBL1957651	Cc1nc(-c2nc(-c3ccc(C(N)=O)cc3)[nH]c2-c2ccc3c(c2)OCO3)cs1	0	0	3	0	34.0611	29.4309	26.679
70175	70175	CHEMBL120838	Cc1noc(-c2nnc3c4c(c(OCc5ccccc5C#N)nn23)C2CCC4CC2)n1	0	0	0	0	51.4367	24.4347	34.278
70190	70190	CHEMBL3198297	COc1ccccc1C1C(C(C)=O)=C(C)N=c2s/c(=C\c3cc(OC)c(OC)c(OC)c3)c(=O)n21	0	0	0	0	35.5542	33.0864	30.3198
70396	70396	CHEMBL1430455	CCCC(=O)NC(=S)Nc1nc(-c2ccc(OC)cc2)cs1	0	0	0	0	29.2448	21.7403	21.0652
70515	70515	CHEMBL1173376	CCCCC(Sc1nc(OCCc2ccc(C)cc2)cc(OCCc2ccc(C)cc2)n1)C(=O)O	0	2	0	0	34.1789	26.8019	17.7597
70633	70633	CHEMBL1344489	Cc1c(C(=O)NCc2ccco2)sc2nc(-c3ccccc3)cn12	0	0	0	0	34.2289	30.0984	22.3652
70685	70685	CHEMBL1598249	COc1ccc(-c2cn3c(C)c(C(=O)Nc4ccncc4)sc3n2)cc1	0	2	0	0	34.2224	28.564	23.3626
70777	70777	CHEMBL3260656	COc1ccc(C(=O)/C=C/c2cc(/C=N/c3nccs3)c(O)c(C(C)(C)C)c2)cc1	0	0	0	0	54.139	16.6079	25.1789
70818	70818	CHEMBL395421	COc1ccc(-n2c(S(C)(=O)=O)nc3sc4c(c3c2=O)CCCC4)cc1	0	0	0	0	28.1698	23.8129	26.2403
70968	70968	CHEMBL1779215	O=C1COc2c(Cl)cc(Cl)cc2N1Cc1nnc(-c2ccc(Cl)cc2)n1CCC(F)(F)F	0	0	0	0	59.4062	39.0138	46.9485
71030	71030	CHEMBL466619	COc1ccc(Nc2ncnc3ccc(NC(=O)Nc4ccc(Br)cc4)cc23)cc1OC	0	0	0	0	31.5385	20.9982	22.6794
71044	71044	CHEMBL1560716	CCOC(=O)c1c(C)nc2sc3c(=O)n(-c4ccc(C)cc4)cnc3c2c1-c1ccc(OC)cc1	0	0	0	0	33.8064	27.0433	29.4329
71082	71082	CHEMBL1527916	CCOc1ccc2nc(SCC(=O)Nc3ccc(F)cc3)nc(-c3ccccc3)c2c1	0	0	0	0	34.4178	26.9338	24.0974
71166	71166	CHEMBL3945810	Cc1cccc(-c2csc(N3CC[C@@]4(C(=O)O)C[C@H]4C3)n2)c1OCc1ccc2c(c1C)CCN(C1COC1)C2	0	0	0	0	25.0105	7.79483	19.5108
71186	71186	CHEMBL300883	COc1ccc(-c2nc(SCCCCCN(CCCCCSc3nc(-c4ccc(OC)cc4)c(-c4ccc(OC)cc4)[nH]3)C(=O)NC(C)C)[nH]c2-c2ccc(OC)cc2)cc1	0	0	0	0	49.8193	16.1242	24.6566
71215	71215	CHEMBL1271856	COc1cc(C(=O)c2cnc(-c3cc(OC)c(OC)c(OC)c3)n2S(=O)(=O)c2ccccc2)cc(OC)c1OC	0	0	0	0	22.0162	20.2845	21.2468
71520	71520	CHEMBL234560	COc1ccc(C(=O)CSc2nc3sc4c(c3c(=O)n2N)CCCC4)cc1	0	0	0	0	35.6649	21.3026	21.6888
71553	71553	CHEMBL592932	COc1ccc(-c2csc3ncn4c(=O)c5ccccc5nc4c23)cc1	0	0	0	0	32.6913	26.1565	28.8026
71885	71885	CHEMBL1923704	COc1cccc(-c2cnc(-c3cc(C(=O)N[C@@H](C)c4ccccc4)cc(N(C)S(C)(=O)=O)c3)[nH]2)c1	1	0	0	0	23.4064	21.6366	18.4916
71895	71895	CHEMBL1165060	COc1ccc(-c2cc(-c3ccc(F)cc3)nc(NC(=O)N/N=C\c3cccc(Cl)c3)n2)cc1OC	0	0	0	0	52.8946	37.6427	26.5254
71939	71939	CHEMBL2283528	C(=N/C1Oc2ccccc2CC1c1noc(-c2nccs2)n1)\c1nccs1	0	0	0	0	47.1376	38.5604	37.8826
72153	72153	CHEMBL12028	COc1ccccc1N1CCN(CCCSc2nc3sc(C)c(C)c3c(=O)n2N)CC1	0	0	0	0	38.3123	11.8272	19.7592
72180	72180	CHEMBL1814698	COC(=O)C1=C(C)NC(C)=C(C(=O)OC)C1c1c(-c2cc(OC)c(OC)c(OC)c2)nc2sc(Cl)cn12	0	0	0	0	29.2966	22.5105	17.6455
72312	72312	CHEMBL2237254	COc1ccc(C2c3sc(Nc4ccc(S(N)(=O)=O)cc4)nc3Oc3nc[nH]c(=O)c32)cc1OC	0	0	0	0	24.927	19.2164	20.65
72361	72361	CHEMBL3197871	COc1ccc(/C=N/N(C(C)=O)c2nc(-c3ccc(C)cc3)cs2)cc1	0	0	0	0	42.5302	37.0386	35.688
72369	72369	CHEMBL1329268	COc1ccc2c(c1OC)C(=O)N(c1nccs1)C2	0	0	0	0	33.8151	31.5753	29.5316
72424	72424	CHEMBL4213099	COC(=O)N[C@H](C(=O)N1CCC[C@H]1c1ncc(-c2cc(F)c3c(c2)O[C@@H](c2ccc(C4CC4)s2)n2c-3cc3cc(-c4cnc([C@@H]5CCCN5C(=O)[C@@H](NC(=O)OC)C5CC6CCC(C5)O6)[nH]4)ccc32)[nH]1)C(C)C	0	0	0	0	22.9725	7.48009	15.6703
72926	72926	CHEMBL552270	COc1ccc(C(=O)Nc2ncc(Cc3ccc(F)c(Cl)c3)s2)cc1OCCO	0	0	0	0	36.4208	33.8402	22.3988
72997	72997	CHEMBL1501479	COc1ccc(CCNC(=O)CSc2nc(C)nc3sccc23)cc1OC	0	0	0	0	33.7129	26.9533	25.173
73136	73136	CHEMBL1318365	CCOc1ccc(-c2nnc(SCC(=O)NC(C)(C)C)nc2-c2ccc(OCC)c(OC)c2)cc1OC	0	0	0	0	56.0231	18.127	28.4528
73228	73228	CHEMBL1468005	COc1ccc(CCNC(=O)CCc2nc(O)c3c4c(sc3n2)CCCC4)cc1	0	0	0	0	34.9182	28.0323	24.2662
73325	73325	CHEMBL487625	CCOC(=O)c1cc2c(Cn3ccnc3)c(O)c(OC)cc2nc1CSc1ccc(F)cc1	0	0	0	0	33.9497	28.849	26.5078
73341	73341	CHEMBL453335	CCOC(=O)c1cc2c(Cn3ccnc3)c(O)c(OC)cc2nc1CSc1cccc(OC)c1	0	0	0	0	34.5469	29.3705	26.8802
73365	73365	CHEMBL3471729	Cc1nc(COC[C@@H]2CC[C@H]3[C@H](CCN3S(C)(=O)=O)O2)cs1	0	0	0	0	3.9902	2.05814	16.0111
73435	73435	CHEMBL526391	COc1ccccc1CCNc1nc(C)cc(N[C@@H](CC(C)C)C(=O)NCc2cccs2)n1.O=C(O)C(F)(F)F	0	0	0	0	38.189	11.5755	20.2379
73475	73475	CHEMBL246919	COc1ccc(-n2c(SCCl)nc3sc4c(c3c2=O)CCCC4)cc1	0	0	0	0	33.0604	26.0451	29.0362
73574	73574	CHEMBL391422	COc1ccc(C)c(OC(CCN2CCC(n3c(=O)n(C[S+](C)[O-])c4ccccc43)CC2)C(C)C)c1	0	0	0	0	38.0462	11.5998	24.3807
73841	73841	CHEMBL1555473	COc1ccc(N2CCN(C(=O)CCC(=O)NNc3nc4ccccc4c4nc(C)nn34)CC2)cc1	0	0	0	0	49.0542	22.0777	26.1654
73884	73884	CHEMBL1605779	COc1ccc(-c2cn3c(C)c(C(=O)NC(C)(C)C)sc3n2)cc1	0	0	0	0	56.6749	17.828	25.9964
74005	74005	CHEMBL393644	C#CCSc1nc2sc(CC)c(C)c2c(=O)n1-c1ccc(OC)cc1	0	0	0	0	33.008	25.9069	28.6801
74143	74143	CHEMBL2325139	CN(C)CC(CN(C)C)NC(=O)COc1ccc2sc(CNc3nncc(-c4c(Cl)cccc4Cl)n3)nc2c1	0	0	0	0	30.9144	19.0099	17.0619
74155	74155	CHEMBL1829707	O=C1COc2ccc(-c3[nH]c(-c4ccc(Cl)cc4Cl)nc3-c3ccccc3)cc2N1	0	0	0	0	43.5405	31.1975	23.2822
74392	74392	CHEMBL4094092	COc1ccccc1Cn1cnc2sc3c(c2c1=O)CCC(NCc1ccccc1)C3	0	0	0	0	27.6752	21.0533	19.7347
74442	74442	CHEMBL4169769	Cc1cc(Nc2ncc(Cl)c(Nc3ccccc3S(=O)(=O)C(C)C)n2)c(OC(C)C)cc1C1CCN(CC(=O)NCCNc2cccc3c2C(=O)N(C2CCC(=O)N(C)C2=O)C3=O)CC1	0	0	0	0	13.2603	10.088	10.922
74488	74488	CHEMBL474832	COc1cc(Nc2nc(NC3CCCC[C@H]3N)n3nc(-c4cccc(O)c4)nc3c2C(N)=O)cc(OC)c1	0	0	3	0	35.1539	14.8014	20.4945
74688	74688	CHEMBL158789	CCOC(=O)Nc1cc2c(nc(SCc3ccc(OC)cc3)n2N)c(N)n1	0	0	0	0	34.2399	20.4997	22.0352
74738	74738	CHEMBL1608446	COc1ccc(CCn2c(SCC(=O)Nc3cc(C)on3)nc3ccsc3c2=O)cc1OC	0	2	0	0	48.0325	38.7218	32.6125
74847	74847	CHEMBL1822206	CCn1ccnc1-c1cc2cccc(Oc3ccc(NC(=S)NC(=O)Cc4ccccc4)cc3F)c2s1	0	0	3	0	27.0651	20.1844	19.6942
75039	75039	CHEMBL2325140	O=C(NCCOc1ccc2sc(CNc3nncc(-c4c(Cl)cccc4Cl)n3)nc2c1)[C@@H]1CSC(c2ccccc2O)=N1	0	0	0	0	32.817	10.172	15.4758
75046	75046	CHEMBL2153435	CCNC(=O)C[C@H]1N=C(c2ccc(Cl)cc2)c2cc(OC)ccc2-n2c(C)nnc21	0	0	0	0	59.6375	40.613	28.9649
75071	75071	CHEMBL4085549	C#CCNC(=O)c1csc2nc(-c3ccc(OC)cc3)cn12	0	0	0	0	33.5009	29.5116	24.1086
75109	75109	CHEMBL1784050	C#CCNc1ccnc2sc3c(=O)n(-c4ccc(OC)c(F)c4)cnc3c12	0	0	0	0	28.3828	21.7449	20.1558
75429	75429	CHEMBL2299068	COc1ccc(-c2nn3c(SCC(=O)Nc4ccccc4F)nc4ccccc4c3nc2=O)cc1	0	0	0	0	50.3423	38.9227	30.3532
75533	75533	CHEMBL2135116	CCOc1ccc(-c2noc(-c3csc([C@@H]4C[C@H](O)[C@@H](CO)O4)n3)n2)cc1	0	0	0	0	52.3925	16.0336	25.1322
75670	75670	CHEMBL1736566	NC(=O)C1CCN(c2ncc(-c3ccc4c(c3)OCO4)s2)CC1	0	0	0	0	54.8446	16.7602	27.5386
75778	75778	CHEMBL1779212	CC(C)(Cc1nnc(CN2C(=O)COc3c(Cl)cc(Cl)cc32)n1CCC(F)(F)F)c1ccccc1	0	0	0	0	53.1138	23.2808	38.5683
75963	75963	CHEMBL1779210	CS(=O)(=O)c1cc(Cl)cc2c1OCC(=O)N2Cc1nnc(CCc2ccc(Cl)cc2)n1CCC(F)(F)F	0	0	0	0	24.996	23.6405	27.6911
75973	75973	CHEMBL592579	CCN(CC)C(=O)CSc1nc2cc(OC)c(OC)cc2c2nc(-c3ccccc3)nn12	0	0	0	0	50.4667	38.3288	38.0089
76100	76100	CHEMBL3125865	COc1cccc(Cc2cnc(NC(=O)c3occc3C)s2)c1	0	0	0	0	35.05	32.8161	23.8203
76117	76117	CHEMBL467600	CC(=O)Nc1nc2c(Oc3cc(-c4ccc(C(F)(F)F)cc4NC(=O)NC(C)(C)C)ncn3)cccc2s1	0	0	0	0	52.0288	16.1578	25.3779
76317	76317	CHEMBL2325159	Cn1nc(O)c(=O)nc1SCCOc1ccc2sc(CNc3nncc(-c4c(Cl)cccc4Cl)n3)nc2c1	0	0	0	0	30.534	18.8775	17.0368
76341	76341	CHEMBL2325156	CS(=O)(=O)NC(=O)COc1ccc2sc(CNc3nncc(-c4c(Cl)cccc4Cl)n3)nc2c1	0	0	0	0	24.8832	18.8595	15.6504
76680	76680	CHEMBL378409	CCN(CC)CCOc1ccc(Nc2cc(N(C)C(=O)Nc3cc(NC(=O)c4cc5ccccc5s4)ccc3C)ncn2)cc1	0	0	3	0	25.4397	18.3457	18.1443
76844	76844	CHEMBL1300619	COc1ccc(NC(=O)CSc2nc3nnc(C)c-3c(N)n2-c2ccc(Cl)c(C)c2)cc1OC	0	0	0	0	34.4706	21.0572	18.1942
77030	77030	CHEMBL547307	COc1ccc(NC(=O)[C@H](C)Nc2cc(C)nc(NCC3CCCCC3)n2)cc1.O=C(O)C(F)(F)F	0	0	0	0	37.7385	13.0284	20.9125
77366	77366	CHEMBL1592039	CC(C)(C)c1ccc(Oc2nc3ccccn3c(=O)c2/C=C(\C#N)c2nc3ccccc3s2)cc1	0	0	0	0	56.7099	17.1211	33.6767
77446	77446	CHEMBL339403	COc1cc2c(N3CCN(C(=O)Nc4ccc(OC(C)C)cc4)CC3)ncnc2cc1OCCCS(=O)(=O)CCC(C)C	0	0	3	0	15.5829	14.0462	16.033
77542	77542	CHEMBL101205	CCOC(=O)c1sc(Nc2nc(OCc3ccc(S(C)(=O)=O)cc3)c3ncn(CC)c3n2)nc1C	0	0	0	0	26.036	20.3784	18.6757
77549	77549	CHEMBL1601791	COc1cccc(CNC(=O)c2ccc3c(c2)sc2nc(-c4ccccc4)cn23)c1OC	0	0	0	0	34.3729	30.1417	26.7083
77912	77912	CHEMBL2019104	COc1cc(N2CCCNCC2)ccc1-c1nc2snc(C3CCCCC3)c2c(=O)[nH]1	0	0	0	0	39.4579	12.2047	20.4737
77993	77993	CHEMBL2386758	COC(=N)c1nc2ccc3ncnc(Nc4cc(OC)c(OC)c(OC)c4)c3c2s1	0	0	3	0	27.2638	19.7703	31.7992
78117	78117	CHEMBL95281	CC(C)(C)c1nc(OCC(=O)O)c(C#N)c(SCc2ccc(Br)cc2F)n1	0	0	0	0	58.0275	19.6333	21.5905
78134	78134	CHEMBL2205375	COc1ccc(-n2cnc3c(sc4ncnc(NC5CC5)c43)c2=O)c(F)c1	0	0	0	0	41.4914	12.8109	21.0298
78150	78150	CHEMBL2205914	COc1ccc(-n2cnc3c(sc4ncnc(NCCCCO)c43)c2=O)cc1	0	0	0	0	27.3855	20.7335	19.5882
78158	78158	CHEMBL2205910	CCCNc1ncnc2sc3c(=O)n(-c4ccc(OC)cc4)cnc3c12	0	0	0	0	28.3058	21.7811	20.0938
78170	78170	CHEMBL2205365	COc1ccc(-n2cnc3c(sc4ncnc(Nc5ccc(C)cc5)c43)c2=O)cc1	0	0	0	0	28.1988	21.6271	20.0901
78295	78295	CHEMBL4290853	CCc1ccc(C(=O)c2[nH]c3ccccc3c2CCNc2ncc(-c3ccc(OC)c(OC)c3)cn2)s1	0	0	0	0	27.2322	20.4892	22.0177
78509	78509	CHEMBL1743828	COc1cc2c(cc1OC)-c1cc(Nc3ccccc3Cl)nc(=O)n1CC2.Cl	0	0	0	0	33.2235	22.8749	18.3577
78721	78721	CHEMBL2017066	COc1cc2c(cc1OC)-c1c(-c3cnc(CN4CCOCC4)s3)ncn1CC2	0	0	0	0	39.0979	10.5341	30.68
78733	78733	CHEMBL2017062	COc1cc2c(cc1OC)-c1c(-c3cnc(C(=O)NCc4ccccc4)s3)ncn1CC2	0	0	0	0	34.0799	29.8098	26.1006
78981	78981	CHEMBL3444390	COc1cccc(C2CC(=O)Nc3nc(N4CCOCC4)sc32)c1OC	0	0	0	0	55.5522	17.0468	27.9855
79037	79037	CHEMBL3502091	CN1C(=O)CCC12CCCN(Cc1nccs1)C2.O=C(O)C(F)(F)F	0	0	0	0	12.61	1.61004	18.4837
79057	79057	CHEMBL4205642	CC(=O)N1CCN(C(=O)c2sc3ncnc(Oc4ccc(NC(=O)C5(C(=O)Nc6ccc(F)cc6)CC5)cc4F)c3c2C)CC1	0	0	0	0	50.483	15.8605	23.9999
79304	79304	CHEMBL548835	COc1ccc(OC)c(NC(=O)CSc2nc(-c3ccccc3Cl)ns2)c1	0	0	0	0	63.1546	43.9446	30.8146
79427	79427	CHEMBL3922979	O=C(Nc1sc(N2CC(N3CCCCC3)C2)nc1-c1cc(Cl)ccc1OC(F)F)c1cnn2cccnc12	0	0	3	0	38.9596	12.3115	17.4097
79502	79502	CHEMBL1550500	COc1ccc(N2CCN(C(=O)CSc3nc(O)c4ccccc4n3)CC2)cc1	0	0	0	0	53.5693	17.4613	26.0743
79504	79504	CHEMBL4226250	Cc1ncsc1-c1ccc(CNC(=O)[C@@H]2C[C@@H](O)CN2C(=O)[C@@H](NC(=O)COCCCOCCCCOCCCOc2ccc(Nc3ncc(C4CC4)c(NCCCN(C)C(=O)C4CCC4)n3)cc2)C(C)(C)C)cc1	0	0	0	0	31.671	9.36141	18.187
79558	79558	CHEMBL3189758	COc1cc(/C(C)=N/NC(=O)CSc2nc3ccccc3[nH]2)ccc1O	0	0	0	0	49.1407	38.1457	31.9797
80133	80133	CHEMBL594633	CCS(=O)(=O)c1ccc(Oc2cc3nc(-c4ccccn4)[nH]c3cc2CN2CCN(C)C2=O)cc1	0	0	0	0	27.6446	24.6372	21.4662
80180	80180	CHEMBL593971	COc1cc2ncnc(Nc3ccc(-c4nc5cc(Cl)ccc5s4)cc3)c2cc1OCCCN1CCN(C)CC1	0	0	3	0	33.4904	8.14298	33.2699
80192	80192	CHEMBL596087	COc1cc2c(Nc3ccc(-c4nc5ccccc5s4)c(C)c3)ncnc2cc1OCCCN1CCN(C)CC1	0	0	3	0	33.9455	8.86765	28.784
80427	80427	CHEMBL3914316	CO[C@@H]1CN(c2nc(-c3cccc(C)c3OCc3ccc4c(c3F)CCN(C3COC3)CC4)cs2)CC[C@@H]1C(=O)O	0	0	0	0	27.7237	8.21603	21.0525
80443	80443	CHEMBL4109324	COc1cc(COc2ccc(C)cc2-c2csc(N3CC[C@@H](C(=O)O)[C@@H](OC)C3)n2)c(F)c2c1CN(C1CCOCC1)CC2	0	0	0	0	27.615	8.18168	20.9337
80594	80594	CHEMBL2381818	CCN(CC)c1ncc(N(CC)S(=O)(=O)c2ccc(Cl)cc2)c(N[C@@H](Cc2ccc(OC(=O)N3CCCC3)cc2)C(=O)O)n1	0	0	0	0	15.2959	12.8779	10.9467
80928	80928	CHEMBL1542020	COc1ccc(Cl)cc1NC(=O)CSc1nnc(Cn2c(=O)sc3ccccc32)n1C	0	0	0	0	47.1519	39.3601	25.9371
81188	81188	CHEMBL1889193	Cc1cc(C)n2nc(CC(=O)NNC(=O)COc3cccc(C)c3C)nc2n1	0	0	0	0	52.1833	36.6566	31.2861
81406	81406	CHEMBL1432310	O=C(O)c1ccc2c(c1)C(=O)N(c1nccs1)C2=O	0	0	0	0	35.6524	34.1019	16.1262
81905	81905	CHEMBL2018884	COc1cc2ncnc(Oc3ccc(NC(=O)Nc4cccc(Br)c4)c(C)c3)c2cc1OC	0	0	3	0	37.0063	27.9184	26.3825
81999	81999	CHEMBL1705077	CCOc1ccc(-c2nnc(SCC(=O)NCCC(C)C)nc2-c2ccc(OCC)c(OC)c2)cc1OC	0	0	0	0	54.7663	17.6806	27.942
82081	82081	CHEMBL1964265	C[C@@H](Oc1cc(-n2cnc3ccc(O[C@@H]4CCCN(C)CC4)cc32)sc1C(N)=O)c1ccccc1Cl	0	0	3	0	37.6763	11.8096	17.1287
82373	82373	CHEMBL215565	COc1cc(-n2cnc3nc(-c4ccc(Cl)cc4)sc3c2=O)ccc1OCCN1CCCC1	0	0	0	4	38.3413	10.7704	27.6878
82381	82381	CHEMBL212657	COc1cc(-n2cnc3cc(-c4ccc(F)cc4)sc3c2=O)ccc1OCCN1CCCC1	0	0	0	4	38.8655	11.3983	23.8597
82389	82389	CHEMBL1703267	COc1ccc(-c2nc3c4ccccc4n(CC(=O)Nc4ccc(C(C)C)cc4)c(=O)n3n2)cc1	0	0	0	0	50.2755	22.5096	26.6392
82428	82428	CHEMBL4112354	COc1cc(COc2c(C)cccc2-c2csc(N3CC[C@@H](C(=O)O)[C@@H](OC)C3)n2)c(F)c2c1CN(C1CCOCC1)CC2	0	0	0	0	27.6285	8.18794	20.9314
82617	82617	CHEMBL1276572	CCOC(=O)C1=C(N)Oc2ccc(Sc3nc4ccccc4[nH]3)cc2C1c1cccs1	0	0	0	0	27.9395	21.0536	20.1125
82656	82656	CHEMBL1760642	CNCCOc1cc(Cl)c(C(F)(F)F)cc1NC(=O)NCCc1ccc2nc(NC(C)=O)[nH]c2c1	0	0	3	0	29.5343	19.3007	16.7883
82764	82764	CHEMBL1257712	CCC(=O)N1c2ccccc2-c2nnc(SC)nc2O[C@H]1c1cccc(C)n1	0	0	0	0	51.9234	38.5939	39.6951
82768	82768	CHEMBL1258293	CCSc1nnc2c(n1)O[C@@H](C)N(C(C)=O)c1ccccc1-2	0	0	0	0	52.286	38.7701	40.0192
82838	82838	CHEMBL608836	O=C(NCCN1CCCCC1)c1ccc(-c2csc3nc(-c4ccc(O)cc4)nn23)cc1	0	0	0	0	36.109	11.596	13.1833
82850	82850	CHEMBL2359463	COc1ccc(NC(=O)CSc2nc3nc(C)c(Cc4ccc(C)cc4)c(C)n3n2)cc1OC	0	0	0	0	50.0484	38.6785	32.3744
82932	82932	CHEMBL2031255	COc1cc(C(=O)NC(=S)Nc2cccc(-n3cnc4ccccc43)c2)cc(OC)c1OC	0	0	0	0	33.5854	21.2478	24.1939
83187	83187	CHEMBL295614	CCCOc1ccc(-c2nccs2)cc1-c1nc2c(c(C)nn2C)c(=O)[nH]1	0	0	0	0	48.3149	39.8109	29.7487
83218	83218	CHEMBL339546	COc1cc2c(cc1OC)C(c1cccc(N)c1)=Nn1c(n[nH]c(=O)c1=O)C2	0	0	0	0	35.3917	21.7168	24.0231
83235	83235	CHEMBL1991102	CC12CC(c3ccccc3O1)C(C(=O)Nc1nccs1)C(=O)N2	0	0	0	0	57.1835	17.7024	26.6587
83255	83255	CHEMBL1499328	Cc1ccc(C(=O)Nc2ncc(Cc3ccc(F)cc3)s2)o1	0	0	0	0	33.8501	32.2193	22.8517
83259	83259	CHEMBL4205562	Cc1cc(=O)n(-c2ccc(F)cc2)nc1C(=O)Nc1ccc(Oc2ncnc3ccsc23)cc1	0	0	3	0	47.9105	39.2271	29.159
83295	83295	CHEMBL4209775	Cc1cc(=O)n(-c2ccc(Br)cc2F)nc1C(=O)Nc1ccc(Oc2ncnc3sccc23)c(F)c1	0	0	0	0	47.826	39.1837	29.0403
83362	83362	CHEMBL2046711	COc1cc2ncnc(Sc3nc(C)c(CC(=O)Nc4cccc(Cl)c4)s3)c2cc1OC	0	0	0	0	34.8098	28.455	20.2324
83370	83370	CHEMBL2046722	COCCOc1cc2ncnc(Sc3nc(CC(=O)Nc4cccc(Cl)c4)cs3)c2cc1OCCOC	0	0	0	0	35.9695	29.4401	20.7444
83889	83889	CHEMBL461426	NC(=O)O[C@H]1CN[C@H](C#Cc2cc3ncnc(Nc4ccc(OCc5cccc(F)c5)c(Cl)c4)c3s2)C1	0	0	3	0	35.4216	11.0662	16.1964
84557	84557	CHEMBL1287965	COc1ccc(-c2c(C)nn3c(NC4(c5nc(C)no5)CCC4)cc(C)nc23)c(C)c1	0	0	0	0	37.5256	16.8685	21.6095
84635	84635	CHEMBL1718217	COc1ccc(S(=O)(=O)N2CCOCC2)cc1NC(=O)CCc1nc(O)c2ccccc2n1	0	0	0	0	15.8812	14.3026	15.4571
84678	84678	CHEMBL127159	CCOc1ccc(-c2csc(C)n2)cc1Nc1ncnc2cc(OCC)c(OCC)cc12	0	0	0	0	27.661	20.2341	32.0675
84969	84969	CHEMBL2148049	CC(C)(C(=O)NCCn1ccc2ncnc(Nc3ccc(Oc4cccc(C(F)(F)F)c4)c(Cl)c3)c21)S(C)(=O)=O	0	0	3	0	15.2398	12.4374	11.743
85447	85447	CHEMBL1877474	CN(C)C(=O)OC1CNC(C#Cc2cc3ncnc(Nc4ccc(OCc5cccc(F)c5)c(Cl)c4)c3s2)C1	0	0	0	0	36.309	11.3767	16.4348
85527	85527	CHEMBL1893292	CCn1c(=S)sc2c(=O)n(CC(=O)Nc3ccc(OC)c(Cl)c3)c(C)nc21	0	0	0	0	34.4564	28.215	20.3089
85589	85589	CHEMBL391949	CCOc1ccc(C(=O)C2=C(O)C(=O)N(c3nccs3)C2c2ccc(OC)cc2)cc1	0	0	0	0	35.0585	32.965	24.4169
85679	85679	CHEMBL1386859	COc1ccc(-c2noc(C(C)n3nc(C)c([N+](=O)[O-])c3C)n2)cc1OC	0	0	0	0	35.4541	16.6055	25.0641
85769	85769	CHEMBL2286617	COc1cc(OC)nc(NC(=O)NS(=O)(=O)c2sccc2COc2cccc(C(F)(F)F)c2)n1	0	0	0	0	26.8927	23.454	20.8496
86346	86346	CHEMBL1643479	Nc1nc(-c2ccc(F)cc2)c2sc(N3CCN(C(=O)COc4ccc(Cl)cc4)CC3)nc2n1	0	0	0	0	39.0244	12.2783	17.3927
86703	86703	CHEMBL1957656	CCCC(=O)NCc1nc(-c2nc(C)cs2)c(-c2ccc3c(c2)OCO3)[nH]1	0	0	3	0	33.9474	29.0074	25.9805
86710	86710	CHEMBL1320747	c1ccc(-c2csc3ncnc(N4CCN(Cc5ccc6c(c5)OCO6)CC4)c23)cc1	0	0	0	0	40.2143	10.9327	32.0775
86883	86883	CHEMBL1612195	COc1cccc(CC(=O)Nc2nc(-c3ccc(OC)c(OC)c3)cs2)c1	0	0	0	0	34.1828	31.9019	26.9161
86890	86890	CHEMBL1241392	CC(=O)Oc1cc(C)ccc1C(=O)Nc1ncc(Br)s1	0	0	0	0	33.5643	32.173	23.9844
86894	86894	CHEMBL1241395	Cc1ccc(C(=O)Nc2ncc(Br)s2)c(O)c1	0	0	0	0	34.2559	33.3156	17.3476
87005	87005	CHEMBL2238157	COc1ccc(-c2cc(-c3ccccc3O)nc(=O)[nH]2)cc1OC	0	0	0	0	35.1661	25.8324	25.2832
87287	87287	CHEMBL1172055	CCC(=O)Nc1nc(-c2ccc(OCC(=O)O)cc2)cs1	0	0	0	0	35.6172	33.5654	18.9814
87343	87343	CHEMBL1494541	COc1ccc(NC(=O)CSc2nnc3c4c(nc(-c5ccccc5)n23)CC(C)(C)OC4)cc1	0	0	0	0	53.3393	17.1425	25.8676
87517	87517	CHEMBL1579492	O=C(CCSc1ccccc1)Nc1nc2c(s1)COc1ccccc1-2	0	0	0	0	34.3635	32.0699	25.4838
87600	87600	CHEMBL1551700	COc1cccc(-c2nc(SCc3ccc(C)cc3)n3[nH]c(=O)cc3n2)c1	0	0	0	0	51.4431	39.966	31.1517
87607	87607	CHEMBL80726	CC(C)(C)Sc1c(CC(C)(C)C(=O)O)n(Cc2ccc(Cl)cc2)c2ccc(OCc3ccc4cccnc4n3)cc12	0	0	0	0	52.0898	17.306	20.2842
87616	87616	CHEMBL386397	COc1ccc(Cn2c(N(C)C)nc3ccc(-n4cnc5cc(-c6ccc(Cl)cc6)sc5c4=O)cc32)cc1	0	0	0	4	34.6048	29.694	34.2403
87759	87759	CHEMBL1335575	COc1ccc2sc(N(CCN(C)C)C(=O)c3cc(Cl)sc3Cl)nc2c1.Cl	0	0	0	0	28.0541	20.3269	27.4692
87868	87868	CHEMBL2063723	CC(C)Nc1cc(-c2csc(N(C)C(=O)c3ccc(OCCF)cc3)n2)ncn1	0	0	0	0	38.6265	11.7099	19.7554
87876	87876	CHEMBL468408	COC(=O)C(CCCN(C)CCCc1nc2cc(OC)ccc2[nH]1)(c1ccc(Br)cc1)C(C)C	0	0	0	0	35.668	13.2623	20.0467
87887	87887	CHEMBL2063726	CC(C)Nc1cc(-c2csc(N(C)C(=O)c3ccc(OCC[18F])cc3)n2)ncn1	0	0	0	0	38.6265	11.7099	19.7554
88200	88200	CHEMBL299877	CCOC(=O)/C=C/C[C@@H]1CN(Sc2ccccc2[N+](=O)[O-])C[C@H](n2nc(C)c3c(Cl)c4cc(OC)ccc4nc32)O1	0	0	0	0	34.089	14.9581	27.7985
88630	88630	CHEMBL1258291	CCC(=O)N1c2ccccc2-c2nnc(SC)nc2O[C@H]1c1ccc(OC)c(Br)c1	0	0	0	0	51.4946	38.2045	39.5965
88657	88657	CHEMBL600599	Nc1nc(N2CCN(C(=O)COc3ccc(Cl)cc3)CC2)c2ccsc2n1	0	0	0	0	40.672	12.8811	18.0661
88675	88675	CHEMBL1699829	CC(=O)C1CCN(c2ncc(-c3ccc4c(c3)OCCCO4)s2)CC1	0	0	0	0	54.5789	16.1927	31.514
88682	88682	CHEMBL2001071	COc1cccc(/C=N/Nc2ncnc3scc(-c4ccccc4)c23)c1OC	0	0	0	0	46.5243	37.1499	49.9927
88822	88822	CHEMBL2017074	COc1cc2c(cc1OC)-c1c(-c3ccccc3Cl)ncn1CC2	0	0	0	0	43.8242	29.1134	38.1038
89068	89068	CHEMBL1898376	COc1ccc(-c2cc3nc(C)c(CCC(=O)NC4CCCCC4)c(C)n3n2)c(OC)c1	0	0	0	0	51.0518	23.002	26.5427
89073	89073	CHEMBL3040861	c1ccc(-c2cccc(Nc3ncnc4cc5c(cc34)OCO5)c2)cc1	0	0	3	0	33.4182	21.2734	34.633
89370	89370	CHEMBL1498398	CCOc1ccc(-n2c(=S)sc3c(O)nc(SCC(=O)NC(C)CC)nc32)cc1	0	0	0	0	34.2519	27.4071	24.7954
89531	89531	CHEMBL4214839	Cc1cc(=O)n(-c2ccc(F)c(F)c2)nc1C(=O)Nc1ccc(Oc2ncnc3ccsc23)cc1	0	0	0	0	47.9375	39.2478	29.1527
89539	89539	CHEMBL2148053	CC(C)(C(=O)NCCn1ccc2ncnc(Nc3ccc(Oc4cccc(Cl)c4)c(Cl)c3)c21)S(C)(=O)=O.Cc1ccc(S(=O)(=O)O)cc1	0	0	3	0	15.2852	12.4554	11.547
90115	90115	CHEMBL1346968	COc1ccc(C)cc1NC(=O)CCCNC(=O)Cn1cnc2sc(C)c(C)c2c1=O	0	0	0	0	35.575	28.8468	23.7467
90167	90167	CHEMBL260024	COc1cc(Nc2nn3c(N[C@@H](CO)C(C)C)cc(C)nc3c2C(N)=O)cc(OC)c1	0	0	3	0	36.2498	15.1388	21.1395
90241	90241	CHEMBL422749	COC(=O)C(=O)Nc1nc(-c2ccc(OC)c(OC)c2)cs1	0	0	0	0	33.4245	31.4593	26.4247
90250	90250	CHEMBL1530552	CCOc1ccccc1NC(=O)Cn1c(=O)n(Cc2ccccc2)c(=O)c2c(C)c(C)sc21	0	0	0	0	34.518	28.0154	22.9047
90388	90388	CHEMBL3194709	Cc1cc(C)nc(N/N=C/c2ccccc2OCC(=O)O)n1	0	0	0	0	53.846	38.4961	24.4604
90553	90553	CHEMBL1586172	COc1cccc(CNC(=O)CSc2n[nH]c3c4cc(OC)ccc4nc-3n2)c1	0	0	0	0	49.9196	38.5437	30.7981
90732	90732	CHEMBL1257309	COC(=O)c1cc2c(Nc3ccc(OC(F)(F)F)cc3)ncnc2s1	0	0	3	0	29.2304	22.7779	20.3739
90838	90838	CHEMBL55341	CCCn1c(=O)c2nc(-c3ccc(OCC(=O)NCCNC(=O)Cc4ccc(I)s4)cc3)[nH]c2n(CCC)c1=O	0	0	0	0	38.0494	31.5941	25.755
90931	90931	CHEMBL2029997	COc1cc2ncnc(Oc3cccc(NC(=O)Nc4cc(C(C)(C)C)nn4-c4ccccc4)c3)c2cc1OC	0	0	3	0	48.8506	21.6743	27.5657
90935	90935	CHEMBL2029995	COc1cc2ncnc(Oc3cccc(NC(=O)Nc4cc(C(C)(C)C)nn4CC(C)C)c3)c2cc1OC	0	0	3	0	48.9317	21.8154	27.5647
91169	91169	CHEMBL1369570	COc1cc(C2CC(=O)n3c(nc4ccccc43)S2)cc(OC)c1OC	0	0	0	0	33.2267	28.1172	28.109
91522	91522	CHEMBL229431	CC(=O)Nc1nc2c(Oc3cc(C4=CCC(C(F)(F)F)CC4)ncn3)cccc2s1	0	0	0	0	56.6118	17.6897	27.1606
91635	91635	CHEMBL1593211	CCc1ccc(OCc2cc(=O)n3cc(C)sc3n2)cc1	0	0	0	0	32.6905	26.6788	28.5698
91821	91821	CHEMBL1165056	COc1ccc(-c2csc(NC(=O)C(CC3CCOCC3)c3ccc(S(C)(=O)=O)cc3)n2)cc1	0	0	0	0	18.4021	18.1035	16.5985
92006	92006	CHEMBL3440956	O=C(N1CCCC1)C12CC(CN1Cc1nccs1)C2	0	0	0	0	11.4416	1.35954	18.5786
92058	92058	CHEMBL313482	CCOc1ccc(S(=O)(=O)N2CCN(C)CC2)cc1-c1nc2c(=O)n(C)c(=O)n(CC3CCCCC3)c2[nH]1	0	0	0	0	15.9372	12.8396	14.8445
92193	92193	CHEMBL1203489	CC(=O)Oc1ccc(-c2csc(N=C(N)N)n2)cc1OC(C)=O.Cl	0	0	0	0	29.0536	21.4467	22.2856
92353	92353	CHEMBL3425551	CC(O)(c1ccc2c(c1)OCO2)c1ncnc2ccccc12	0	0	0	0	36.5377	25.2639	38.3695
92622	92622	CHEMBL1731956	COc1ccc(-c2csc(NC(C)c3nc4cc(C(=O)NCCCO)ccc4n3Cc3ccc(C)cc3)n2)cc1	0	0	0	0	26.4488	19.2589	18.7964
92776	92776	CHEMBL1397380	COc1cccc(-c2cn3c(n2)sc2cc(C(=O)NCCc4ccc(OC)c(OC)c4)ccc23)c1	0	0	0	0	35.3438	30.6641	27.1322
92993	92993	CHEMBL3248768	O=C(Nc1nccs1)c1cc(=O)c2ccccc2o1	0	0	0	0	34.0652	32.4038	23.4953
93122	93122	CHEMBL1474591	CCOc1cc(-c2nnc(SCC(=O)Nc3ccc(F)c(F)c3)nc2-c2ccc(OC)c(OCC)c2)ccc1OC	0	0	0	0	51.0036	38.8795	32.8624
93250	93250	CHEMBL3763877	COc1cc2c(=O)n(-c3ccc(S(N)(=O)=O)cc3)c(S)nc2c(OC)c1OC	0	0	0	0	22.2691	19.9515	20.8346
93308	93308	CHEMBL431121	COc1cc2c(cc1OC)-c1cc(Nc3cccc(C(F)(F)F)c3)nc(=O)n1CC2	0	0	0	0	33.0656	22.1875	23.5888
93413	93413	CHEMBL1915234	CCCCN(C)c1nc(N)c(C(=O)c2cc(OC)c(OC)c(OC)c2)s1	0	0	0	0	29.6485	22.1083	23.4791
93476	93476	CHEMBL4066539	COc1ccc2c(c1)sc1nc(C(=O)NCc3cn(Cc4ccc(F)cc4)nn3)cn12	0	0	0	0	46.5809	38.6842	29.7479
93546	93546	CHEMBL1481277	COc1ccc(Cl)cc1NC(=O)CSc1nc2ccccc2c2nc(-c3ccccc3)nn12	0	0	0	0	50.6147	40.0679	26.8929
93611	93611	CHEMBL1915473	COc1cccc(-c2nc3sccn3c2-c2ccnc(NCCNC(=O)c3cc(N4CCOCC4)cc(C(F)(F)F)c3)n2)c1	0	0	0	0	35.5094	10.763	18.6495
93646	93646	CHEMBL494968	COc1cccc(-n2c(=O)c(Cc3c(F)cccc3F)nn(C[C@H](N)c3ccccc3)c2=O)c1	0	0	0	0	34.9466	21.7012	22.2596
93659	93659	CHEMBL225213	Nc1nc([C@H](Cc2ccc(O)cc2)NC(=O)c2ccc3c(c2)nc(-c2ccoc2)n3C2CCCCC2)cs1	0	0	0	0	36.0393	10.8773	18.5216
93705	93705	CHEMBL468564	CCCn1c(SCc2cc([N+](=O)[O-])ccc2OC)nc2cc(NC(=O)NC(C)(C)C)cc(C(O)NC)c21	0	0	0	0	32.8483	15.3116	20.2372
93805	93805	CHEMBL1257361	CCCCSc1nnc2c(n1)O[C@@H](c1cccc(F)c1)N(C(C)=O)c1ccccc1-2	0	0	0	0	51.9758	38.7173	39.7454
93809	93809	CHEMBL1257714	CCCC(=O)N1c2ccccc2-c2nnc(SCC)nc2O[C@H]1c1cccs1	0	0	0	0	49.153	39.2126	38.8877
93963	93963	CHEMBL2413246	CCCn1c(=O)c2[nH]c(-c3ccc(OCC(=O)NCCNC(=O)CCCCCCCNS(=O)(=O)c4cccc5c(N(C)C)cccc45)cc3)nc2n(CCC)c1=O	0	0	0	0	24.6488	22.6292	19.9451
94314	94314	CHEMBL1214849	CC(C)CN(NC(=O)c1cnc(-c2ccc3c(c2)CCO3)s1)c1nc(C#N)ncc1Cl	0	0	0	0	53.7262	17.3285	22.3448
94364	94364	CHEMBL1493546	Cc1ccc(-n2c([S-])c(C(=O)Nc3ccc(OC(F)F)cc3)[n+]3ccc(C(=O)NCCO)cc23)cc1C	0	0	0	0	31.1941	20.2655	20.3848
94387	94387	CHEMBL1950877	CCCc1nc(-c2ccc(Oc3ccc(CC(=O)O)cc3OC)c(NS(=O)(=O)c3ccc(Cl)cc3Cl)c2)n[nH]1	0	0	0	4	23.2129	23.1524	14.968
94501	94501	CHEMBL1610026	COc1ccc(N(CC(=O)Nc2nccs2)S(=O)(=O)c2c(C)nc(O)nc2O)cc1	0	0	0	0	27.5912	24.7156	21.8931
94854	94854	CHEMBL1320157	COc1ccc(-c2cc(C(F)(F)F)nc(SCCC(=O)Nc3ccc(O)cc3)n2)cc1	0	0	0	0	35.5253	27.8307	24.4727
95322	95322	CHEMBL1496653	CCOc1ccc(CCNC(=O)CCc2nnc3ccc(N4CCOCC4)nn23)cc1	0	0	0	0	49.919	22.5303	26.8207
95404	95404	CHEMBL1761932	CCOC(=O)Nc1ccc(Oc2ncnc3cc(OC)c(OC)cc23)cc1	0	0	3	0	36.4098	26.8975	25.9496
95634	95634	CHEMBL3286988	COc1cc(/C=c2\sc3nc(-c4cccc(Cl)c4)cn3c2=O)cc(OC)c1O	1	0	0	0	34.4318	30.4618	20.3421
95789	95789	CHEMBL569980	COc1ccc(/C=C/C(=O)Nc2nc3ccc(Cl)cc3s2)cc1O	0	0	0	0	34.3342	32.0062	20.9425
96084	96084	CHEMBL1316548	COc1ccccc1-c1cc2nc(C)c(CCC(=O)Nc3cc(C)ccc3C)c(C)n2n1	0	0	0	0	51.2358	36.1682	30.2308
96229	96229	CHEMBL3526849	COc1ccc2nc(COc3ccc(CC4SC(=O)N([C@@H]5O[C@H](C(=O)O)[C@@H](O)[C@H](O)[C@H]5O)C4=O)cc3)n(C)c2c1	0	0	0	0	49.6559	16.5368	18.9152
96415	96415	CHEMBL1434170	CCCN1CNc2c(c(=O)[nH]c(=S)n2Cc2ccc(OC)c(OC)c2)C1	0	0	0	0	31.2502	22.0966	23.1273
96518	96518	CHEMBL322859	C/C(=C\c1csc(C)n1)[C@H](O)C[C@H]1OC(=O)C[C@H](O)C(C)(C)C(=O)[C@H](C)[C@@H](O)[C@@H](C)CCC[C@@]1(C)O	0	0	0	0	6.11309	1.59148	1.59125
96604	96604	CHEMBL598835	O=c1[nH]c2cccc(Oc3cccc(NS(=O)(=O)CCc4ccccc4)c3)c2[nH]1	0	0	3	0	23.0938	21.3549	19.6093
96659	96659	CHEMBL1323289	COc1ccc(-n2c(SCC(=O)NCc3ccc(Cl)cc3)nc3ccsc3c2=O)cc1	0	0	0	0	34.9822	28.3797	20.6742
96742	96742	CHEMBL566702	Cc1nc2sc3c(c2c2nc(Oc4ccccc4)n(-c4ccccc4)c(=O)c12)CCCC3	0	0	0	0	32.8262	26.0627	28.7701
96956	96956	CHEMBL4239793	COc1cc2ncnc(Nc3ccc(F)c(Cl)c3)c2cc1OS(=O)(=O)NC(=O)[C@@H](O)CC(C)C	0	0	0	0	15.2267	12.7399	11.5294
96986	96986	CHEMBL2296540	COc1ccc(C(=O)Nc2nc(C)c(C(=O)N/N=C3\S/C(=C\c4ccc(Cl)cc4)C(=O)N3c3ccccc3)s2)cc1	0	0	0	0	52.0908	16.5169	21.6319
97232	97232	CHEMBL1445893	COc1cccc(-c2nc(NCCNC(C)=O)c3ccccc3n2)c1	0	0	0	0	32.1001	21.7425	21.9595
97280	97280	CHEMBL1487634	COc1ccccc1-c1cc(C(F)(F)F)nc(S(=O)(=O)CCCC(=O)Nc2ccccc2F)n1	0	0	0	0	26.8151	22.9764	20.5631
97526	97526	CHEMBL1336904	Cc1ccccc1OCC(=O)NNC(=O)CSc1nc(N)cc(N)n1	0	0	0	0	34.0809	20.4338	22.4287
97785	97785	CHEMBL6343	COc1cc2nc(N3CCN(C(=O)/C=C/c4ccc(NC(=O)CBr)cc4)CC3)nc(N)c2cc1OC	0	0	0	0	34.7956	12.1755	21.1398
98183	98183	CHEMBL2430958	Cc1nn(C)c(Cl)c1/C=C/C(=O)/C=C/c1ccc(Oc2ncnc3c(C)cccc23)cc1	0	0	0	0	49.6667	34.6185	41.7928
98486	98486	CHEMBL390319	COc1ccc(CC(=O)Nc2ncc(C)s2)cc1	0	0	0	0	33.7385	32.1676	24.8197
98792	98792	CHEMBL2376070	COc1cc2nc(Sc3cnc(N)s3)n(Cc3ccccc3)c(=O)c2cc1OC	0	0	0	0	27.964	21.0014	22.5278
99043	99043	CHEMBL1317945	COc1ccc(-c2noc(CSc3nc4cc(C)ccc4[nH]3)n2)cc1	0	0	0	0	50.9164	39.5863	31.2231
99316	99316	CHEMBL211291	COCc1ccc(C(=O)Nc2ncc(Sc3cc(C(=O)N4CCN(C(C)=O)CC4)c(OC)cc3C)s2)cc1	0	0	3	0	52.1455	16.0335	24.6569
99371	99371	CHEMBL1387555	COc1ccccc1NC(=O)CSc1nc2nnc(C)c-2c(N)n1-c1ccccc1Cl	0	0	0	0	34.772	21.1414	18.4253
99518	99518	CHEMBL2387045	COc1ccccc1C(=O)Nc1cc2nc(-c3cccs3)[nH]c2cc1N1CCCCC1	0	0	0	0	55.4793	17.7211	25.7385
99763	99763	CHEMBL1985722	COc1cc(S(=O)(=O)Nc2nc(-c3ccc(N4C(=O)C(CC(=O)O)SC4c4ccccc4O)cc3)cs2)ccc1Cl	0	0	0	0	15.4306	15.8626	11.6579
99810	99810	CHEMBL2018997	COc1cccc(C=NNC(=O)Cn2c(CSc3ccccc3)nc3ccccc32)c1	0	0	0	0	49.3084	38.8829	30.829
99817	99817	CHEMBL464073	Cn1nnnc1S(=O)(=O)c1c[nH]c2cccc(OCC(=O)NS(=O)(=O)c3cc(Cl)c(Cl)s3)c12	0	0	0	0	25.9388	25.0184	17.4404
99859	99859	CHEMBL2313272	CC(=O)N1CC2CC1CN2Cc1coc2cc(Oc3nc4ncccc4s3)ccc12	1	0	0	0	37.6021	10.7905	25.0053
100068	100068	CHEMBL1401915	Cn1c(=O)c2cc(S(=O)(=O)Nc3ccc4c(c3)OCO4)ccc2n(C)c1=O	0	0	0	0	22.2253	20.1532	20.6162
100164	100164	CHEMBL1761933	COc1cc2ncnc(Nc3ccc(NC(=O)Nc4ccccc4)cc3)c2cc1OC	0	0	3	0	31.8728	21.2253	22.946
100306	100306	CHEMBL304230	COc1ccc2nc3c(c(C)nn3[C@@H]3O[C@H](COC(=O)C(C)C)[C@@H](OC(=O)C(C)C)[C@H]3OC(=O)C(C)C)c(Cl)c2c1	0	0	0	0	49.6674	20.7503	36.8203
100379	100379	CHEMBL231816	COc1ccc(-c2cc3ncn([C@H]4CCN(C(=O)N(C)[C@H]5CCN(C)C5)C4)c(=O)c3s2)cc1	0	0	0	4	36.8402	10.6453	24.0036
100438	100438	CHEMBL295329	CCCOc1ccc(-c2csc(-c3cccnc3)n2)cc1-c1nc2c(c(C)nn2CC)c(=O)[nH]1	0	0	0	0	47.2144	38.7858	29.2033
100461	100461	CHEMBL1576339	Cc1sc2ncnc(OCC(=O)c3ccc(S(=O)(=O)N4CCCC4)cc3)c2c1C	0	0	0	0	18.077	16.2504	19.9058
100471	100471	CHEMBL2030219	CCc1cc2cc3c(=O)n4c(nc3cc2s1)-c1[nH]c2ccc(OC)cc2c1CC4	0	0	0	0	33.8534	27.9414	23.0761
100649	100649	CHEMBL1887148	COc1ccccc1CNC(=O)Nc1nc(C(N)Cc2ccc(Cl)cc2)cs1	0	0	0	0	28.4926	21.1641	16.8883
101151	101151	CHEMBL3198103	CCCCCOc1ccc(/C=c2\sc3nc(=O)c(-c4ccccc4)nn3c2=O)cc1OC	0	0	0	0	46.1998	38.2183	36.3483
101488	101488	CHEMBL3194115	COc1ccccc1/C=N/NC(=O)CCn1cnc2ccccc21	0	0	0	0	49.6731	34.3365	29.9087
101757	101757	CHEMBL3898239	Cc1oc2c(c1CC(=O)Nc1nc(-c3ccc(C(F)(F)F)c(F)c3F)cs1)c(=O)n(C)c(=O)n2C	0	0	0	0	34.2723	27.9726	22.5436
101820	101820	CHEMBL472063	CC(=O)Nc1cc(-c2cccc(OC3CCN(C(C)C)C3)c2)nc(-n2nc(C)cc2C)n1	0	0	0	0	35.1127	14.8505	21.091
101824	101824	CHEMBL3234464	CCN(CC)c1ccc2c(-c3ccc(S(=O)(=O)NCCCC[C@H](NC(=O)Cc4csc(=N)[nH]4)C(=O)N[C@@H](Cc4cn(Cc5ccccc5)c[n+]4C)C(=O)NC4CCN(C)CC4)cc3S(=O)(=O)[O-])c3ccc(=[N+](CC)CC)cc-3oc2c1	0	0	0	4	13.986	10.4342	9.40353
101844	101844	CHEMBL3350781	CCN(CC)c1ccc2c(-c3ccc(S(=O)(=O)NCCCCCCCCCCCCNC(=O)NCCCC[C@H](NC(=O)Cc4csc(=N)n4C)C(=O)N[C@@H](Cc4cn(Cc5ccccc5)c[n+]4C)C(=O)NC4CCN(C)CC4)cc3S(=O)(=O)[O-])c3ccc(=[N+](CC)CC)cc-3oc2c1	0	0	0	4	14.3444	10.9377	9.13864
101997	101997	CHEMBL3701241	C=CC(=O)N1CC(n2nc(C#Cc3cc(OC)cc(OC)c3)c3c(N)ncnc32)C1	0	0	3	0	37.7537	15.7293	21.5685
102005	102005	CHEMBL3667178	CCC(=O)Nc1nc(C)c(C(=O)N[C@@H](C)c2ccc(O[C@@H]3CCN(c4ncnc(NCC(F)F)c4OC)C3)cc2)s1	0	0	0	0	33.7544	10.0655	18.2158
102053	102053	CHEMBL3967951	C[C@@H](C#N)NC(=O)[C@@H](C)Oc1cc(Cl)ccc1Nc1ncnc2cc(N=S3(=O)CCC3)cc(F)c12	0	0	3	0	14.9645	12.4236	11.7835
102134	102134	CHEMBL1454432	COc1cccc(CNC(=O)Cn2c(=O)n3nc(-c4cccc(F)c4)nc3c3ccccc32)c1	0	0	0	0	50.2978	35.523	30.3566
102327	102327	CHEMBL378078	COc1cccc(-c2nc(SC)nc3sc(C(=O)NCc4ccccc4)c(N)c23)c1	0	0	0	0	28.2431	21.5844	20.0335
102365	102365	CHEMBL3941587	CCNc1nc(C)c(S(=O)(=O)N2Cc3cc4c(cc3C[C@H]2C(=O)N[C@@H](Cc2ccc(-c3ccc(F)cc3)cc2)C(=O)O)OCC(c2ccc(OCc3ccc(Cl)c(Cl)c3)cc2)O4)s1	0	0	0	0	24.3342	17.8586	14.1907
102721	102721	CHEMBL3948269	CNCCNS(=O)(=O)c1cc(-c2c(C)nc3c(NCCNC(C)=O)cc(Cl)nn23)ccc1OC	0	0	0	0	24.7909	18.7134	15.5124
102814	102814	CHEMBL1605346	O=C(COc1ccc(Cl)cc1)N(Cc1ccccc1)c1nc(-c2ccccc2)cs1	0	0	0	0	34.0427	31.179	34.534
102837	102837	CHEMBL1642555	COc1nc2sc(-c3cccc([C@H](C)NC(C)=O)c3)nc2c2c1ncn2C	0	0	3	0	33.8131	28.0182	24.0043
102937	102937	CHEMBL1276892	COc1cc2ncnc(N(C)c3cccc(NC(=O)Nc4ccccc4)c3)c2cc1OC	0	0	3	0	38.173	28.4554	26.8395
103184	103184	CHEMBL1434432	COc1ccc(-c2noc(N(c3cccc(Cl)c3)c3nc(-c4ccc(OC)c(OC)c4)no3)n2)cc1OC	0	0	0	0	48.1894	32.0075	40.6909
103215	103215	CHEMBL2332871	O=C(Nc1ccc(Oc2ncnc3[nH]ncc23)cc1)Nc1ccc(C(F)(F)F)cc1Cl	0	0	3	0	51.7874	37.4403	26.4594
103273	103273	CHEMBL1085063	COc1ccc(Cn2ncc3[nH]c(-c4cc(NC(=O)Nc5ccc(Cl)c(Cl)c5)ccc4C)nc32)cc1	0	0	3	0	49.4729	36.2931	25.6102
103366	103366	CHEMBL3895964	COc1cc2c(Oc3ccc(NC(=O)c4nn(-c5ccc(Cl)cc5Cl)c(=O)n4C)cc3F)ccnc2cc1OCCCN1CCN(C)CC1	0	0	0	0	28.0833	11.3824	21.3879
103452	103452	CHEMBL1277162	COc1cc2ncnc(Oc3ccc(NC(=O)Nc4ccccc4)cc3)c2cc1OC	0	0	3	0	36.9424	27.8581	26.3298
103551	103551	CHEMBL588507	Cc1nc(-c2nc(NCc3ccc4c(c3)OCO4)ncc2-c2ccsc2)sc1C	0	0	0	0	27.6479	20.2089	31.3604
103744	103744	CHEMBL3760082	COc1ccc(C=O)cc1-c1cc2c(N[C@H](C)c3ccccc3)ncnc2s1	0	0	3	0	28.4559	21.8637	19.9657
103754	103754	CHEMBL1095611	COc1ccc(-c2cc(-c3ccc(F)cc3)nc(NC(=O)CN3CCOCC3)n2)cc1	0	0	0	0	38.4438	13.5872	21.3976
103875	103875	CHEMBL1642729	O[C@@H]1[C@@H](Cn2cnnn2)O[C@@H](c2ccc(Cl)c(Cc3ncc(-c4ccco4)s3)c2)[C@H](O)[C@H]1O	0	0	0	0	51.7646	16.4006	22.2746
104130	104130	CHEMBL1518332	Cc1cn2c(=O)cc(COc3ccccc3NC(=O)c3ccccc3C)nc2s1	0	0	0	0	34.0996	28.2058	22.9952
104191	104191	CHEMBL1089027	COc1ccc(N(C)c2nc(C)nc3ccc(NC(C)=O)cc23)cc1	0	0	0	0	37.5289	27.5461	25.0011
104279	104279	CHEMBL3823037	CCc1cc(CC)n2nc(-c3ccc(OC)cc3)c(CC(=O)N(CC)C(C)(C)C)c2n1	0	0	0	0	54.1685	23.572	35.298
104395	104395	CHEMBL1571029	COc1ccc(OC)c(-c2csc(NC(=O)Cc3ccc(F)cc3)n2)c1	0	0	0	0	34.3118	32.2683	24.7133
104398	104398	CHEMBL359613	CN(C(=O)COc1nn2c(-c3ccccc3)nnc2c2c1C1CCC2CC1)c1ccccc1	0	0	0	0	52.226	22.9936	33.7698
104464	104464	CHEMBL3936505	CCOc1cc2ncnc(Nc3ccc(NS(=O)(=O)c4ccccc4)cc3)c2cc1NC(=O)/C=C/CN1CCN(C)CC1	0	0	3	0	14.1798	10.8003	13.9183
104646	104646	CHEMBL3927908	COc1cc2c(Oc3ccc(NC(=O)c4nn(-c5ccccc5Cl)c(=O)n4C)cc3F)ccnc2cc1OCCCN1CCCCC1	0	0	0	0	28.2495	11.5536	21.4801
104656	104656	CHEMBL230142	COc1ccc(/C=N/NC(=O)Cc2csc3nc(-c4ccc(Br)cc4)cn23)cc1	0	0	0	0	46.5146	38.6439	29.9061
105194	105194	CHEMBL3964084	COCCNc1nc(C)c(S(=O)(=O)N2Cc3cc4c(cc3C[C@H]2C(=O)N[C@@H](Cc2ccc(-c3ccc(C#N)cc3)cc2)C(=O)O)OC[C@H](c2ccc(OCc3ccc(Cl)c(Cl)c3)cc2)O4)s1	0	0	0	0	24.1976	17.569	14.0974
105369	105369	CHEMBL548769	Cc1ccc2sc(N(CCCn3ccnc3)C(=O)c3ccco3)nc2c1C.Cl	0	0	0	0	34.2643	29.7071	32.1642
105493	105493	CHEMBL1090355	O=C(Nc1cccc(-c2nc3sccn3c2-c2ccnc(Nc3ccc(N4CCOCC4)cc3)n2)c1)Oc1ccccc1	0	0	3	0	35.6268	10.6447	19.8536
105513	105513	CHEMBL1885298	O=C(OC1CNC(C#Cc2cc3ncnc(Nc4ccc(OCc5cccc(F)c5)c(Cl)c4)c3s2)C1)N1CCOCC1	0	0	0	0	34.9319	10.9579	16.0895
105949	105949	CHEMBL1395819	COc1ccc(C)cc1NC(=O)CSc1nc(=O)n(Cc2ccccn2)c2c1CCC2	0	0	0	0	34.9299	27.7852	24.4715
106101	106101	CHEMBL2349118	Cc1ccc2[nH]c(-c3ccccc3)c(C3C=C(c4ccccc4)Oc4[nH]c(=O)nc(N)c43)c2c1	0	0	0	0	33.9944	22.7591	22.7352
106130	106130	CHEMBL3910232	CCn1cnc(S(=O)(=O)N2CCC(C(=O)Nc3nc4ccc(OC)cc4s3)CC2)c1	0	0	0	0	17.6896	16.8064	16.5708
106157	106157	CHEMBL1782303	C=CCc1c(C)nc(-c2ccc(OC)s2)nc1Nc1ccc(CC(=O)O)cc1	0	0	0	0	28.1658	21.9097	15.0458
106182	106182	CHEMBL3983201	COc1cc2c(Nc3ccc(Cl)c(Cl)c3)ncnc2cc1OCc1csc(-c2ccc(C(F)(F)F)cc2)n1	0	0	3	0	26.7022	18.7163	35.9994
106280	106280	CHEMBL590597	COc1ccc(-c2sc(S(=O)(=O)NC(=O)Nc3ncc(Br)s3)cc2C)c(C)c1	0	0	0	0	28.3555	27.7415	22.1243
106431	106431	CHEMBL1969138	COc1cc(C2SC(C)C(=O)N2c2ccc(-c3csc(NS(=O)(=O)c4ccc(Cl)c(OC)c4)n3)cc2)ccc1O	0	0	0	0	15.8453	15.8698	12.6081
106968	106968	CHEMBL3350095	O=C(CN1[C@@H](COc2ccccc2)[C@@H](O)[C@H](O)[C@H](COc2ccccc2)N(Cc2cccc(I)c2)S1(=O)=O)Nc1nccs1	1	0	0	0	18.2151	17.8122	17.0678
107115	107115	CHEMBL3658192	C[C@H](NC(=O)C(F)F)c1ccc(OC2CCN(c3ncnc(OCC4CC4)c3F)C2)cc1	0	0	0	0	50.7821	17.9364	25.8432
107119	107119	CHEMBL3662286	CCOc1ncnc(N2CC[C@@H](Oc3ccc([C@H](C)NC(C)=O)cc3)C2)c1F	0	0	0	0	51.3354	18.1542	26.0414
107282	107282	CHEMBL3823451	COc1cc(-c2nn(CCN3CCN(C)CC3)c3ncnc(N)c23)ccc1NC(=O)OC(C)(C)C	0	0	3	0	34.4213	14.4638	20.7321
107290	107290	CHEMBL3823239	COc1cc(-c2nn(CCN3CCC(N(C)C)CC3)c3ncnc(N)c23)ccc1NC(=O)CCc1ccccc1	0	0	0	0	32.9035	13.9732	19.7371
107675	107675	CHEMBL1453530	N#CCSc1nc2c(sc(=S)n2Cc2ccco2)c(=O)n1-c1ccc(F)cc1	0	0	0	0	33.8308	27.0189	30.6635
107685	107685	CHEMBL1834262	O=c1[nH]cnc2nc(N3CCC(Oc4ccccc4C(F)(F)F)CC3)sc12	0	0	0	0	55.68	17.5134	26.6177
107752	107752	CHEMBL1829067	N#CC1=C(NC(N)=O)Oc2nc(Nc3ccc(S(N)(=O)=O)cc3)sc2C1c1ccc(Cl)cc1	0	0	0	0	24.7313	19.2733	15.6057
107821	107821	CHEMBL3808865	O=C(NCc1ccc(Oc2ccc(F)cc2)cc1)c1c(-c2ccc3sc4ccccc4c3c2)nc2ccccn12	0	0	0	0	34.6096	30.4532	23.7309
107827	107827	CHEMBL1940538	COc1ccc(C(C)(C)N[C@@H]2CC[C@H](C(=O)N3CCN(c4nc5ccccc5[nH]4)CC3)[C@@H](c3ccsc3)C2)cc1	0	0	0	4	37.1038	11.2278	19.7819
108064	108064	CHEMBL3759788	COc1cc(NC(=O)Nc2nc(-c3ccc(Cl)s3)cs2)cc(OC)c1OC	0	0	0	0	34.1712	32.1097	21.0461
108075	108075	CHEMBL2326337	NC(=O)COc1ccc2sc(CNc3nncc(-c4c(Cl)cccc4Cl)n3)nc2c1	0	0	0	0	32.883	20.0745	17.7298
108304	108304	CHEMBL1903083	O=C(CCc1nc(O)c2ccccc2n1)NNC(=O)COc1ccc(Br)cc1	0	0	0	0	50.9986	36.4692	31.0283
108593	108593	CHEMBL1898526	COc1cccc(-c2cc3nc(Nc4ccc(OC)c(OC)c4)n(C)c(=O)c3s2)c1	0	0	0	0	27.9848	21.2869	22.5285
108616	108616	CHEMBL1903317	COc1cccc2c1Oc1nc(-c3ccccc3)nc(SCC(=O)Nc3ccccc3)c1C2	0	0	0	0	33.9127	26.6142	25.0705
108647	108647	CHEMBL3977030	COc1cc2c(Nc3ccc(Cl)c(Cl)c3)ncnc2cc1OCc1csc(C2CCCCN2)n1	0	0	3	0	35.9952	8.80938	35.1406
108659	108659	CHEMBL3945353	COc1cc2c(Nc3ccc(Cl)c(Cl)c3)ncnc2cc1OCc1nc2c(s1)CNCC2	0	0	3	0	26.0568	17.9314	35.1974
108682	108682	CHEMBL1410587	COc1ccc(-c2noc(CSc3nc(O)cc(-c4ccccc4)n3)n2)cc1	0	0	0	0	49.8964	38.8514	30.6188
108717	108717	CHEMBL360033	O=C(O)c1cnc(N(C(=O)c2ccc(OCc3cccc(C(F)(F)F)c3)cc2)C2CCCCC2)s1	0	0	0	0	54.4875	17.5629	20.3543
108814	108814	CHEMBL2140802	COc1cccc(-c2cc3nc(NCCOc4ccccc4Cl)n(C)c(=O)c3s2)c1	0	0	0	0	27.8157	21.3298	17.2056
108954	108954	CHEMBL1562423	CCn1c(CC(=O)Nc2ccc(C)c(Cl)c2)nnc1SCCOc1ccc(OC)cc1	0	0	0	0	59.3854	42.735	29.7127
109335	109335	CHEMBL1435901	COc1ccc(N2CCN(C(=O)c3nn(-c4ccc(C)cc4)c(=O)n(C)c3=O)CC2)cc1	0	0	0	0	50.7275	22.1931	33.4477
109464	109464	CHEMBL2109922	O=c1c2sc(-c3ccc(Cl)cc3)cc2ncn1-c1ccc(OCCN2CC[C@@H](F)C2)cc1	0	0	0	0	38.6069	10.8705	27.6194
109676	109676	CHEMBL546373	CCCCNCc1ccc(-c2nc(CN(CCCn3ccnc3)C(=O)C3COc4ccccc4O3)cs2)cc1	0	0	0	0	26.4142	19.2449	20.465
109800	109800	CHEMBL1511219	COc1cc(SC)ccc1C(=O)Nc1nc2ccccc2[nH]1	0	0	0	0	32.8927	28.5221	23.1157
110822	110822	CHEMBL151009	CC(=O)Oc1ccc(-c2csc(NC(=N)NCc3ccccc3)n2)cc1OC(C)=O	0	0	0	0	28.3759	20.7677	21.8434
111148	111148	CHEMBL474603	NC(=O)c1sc(-n2cnc3ccccc32)cc1OCc1ccccc1Cl	0	0	3	0	33.5293	30.0146	20.9141
111964	111964	CHEMBL1543668	COc1ccc(CCNC(=O)Cn2c(=O)n(-c3ccc(C)c(F)c3)c(=O)c3sccc32)cc1OC	0	0	0	0	34.7806	28.2132	26.2019
112044	112044	CHEMBL1314632	COc1ccc2nc(NC(=O)c3nc(SCc4ccccc4F)ncc3Cl)sc2c1	0	0	0	0	34.0036	28.5064	20.5334
112459	112459	CHEMBL1939658	CCN(CC)CCCOc1cc2ncnc(Nc3ccc4sc(C(=O)Nc5c(C)cccc5Cl)cc4c3)c2cc1OC	0	0	0	0	26.4689	19.7758	16.392
112623	112623	CHEMBL1940539	COc1ccc(C2(N[C@@H]3CC[C@H](C(=O)N4CCN(c5nc6ccccc6[nH]5)CC4)[C@@H](c4ccsc4)C3)CCC2)cc1	0	0	0	4	37.0137	11.2026	19.7226
112737	112737	CHEMBL1779220	O=C1COc2c(Cl)cc(Cl)cc2N1Cc1nnc(C2CCc3ccccc3C2)n1CCC(F)(F)F	0	0	0	0	58.6777	38.9612	46.6778
112961	112961	CHEMBL1537879	Cc1ccc(OCCn2cnc3sc(C(N)=O)c(C)c3c2=O)cc1	0	0	0	0	34.06	27.6169	22.7631
113180	113180	CHEMBL527706	COc1ccccc1CCNc1nc(C)cc(NCCC(=O)Nc2ccccc2)n1.O=C(O)C(F)(F)F	0	0	0	0	29.754	20.2	20.7547
113370	113370	CHEMBL293102	CCCn1c(=O)c2nc(-c3ccc(OCC(=O)NCCNC)cc3)[nH]c2n(CCC)c1=S	0	0	0	0	30.8935	19.7708	21.2195
113712	113712	CHEMBL2408115	CC(C)Oc1cc(Oc2ccc(S(C)(=O)=O)cc2)cc(-c2ncc(Cl)c(=O)[nH]2)c1	0	0	0	0	18.0462	16.5582	13.3017
113775	113775	CHEMBL2205378	CNc1ncnc2sc3c(=O)n(-c4ccc(OC)cc4)cnc3c12	0	0	0	0	28.6177	22.0585	20.2489
114123	114123	CHEMBL1333874	COc1ccc(-n2c(Cc3cccn3C)nnc2SCC(=O)NCc2ccccc2Cl)cc1	0	0	0	0	49.6384	39.5914	26.5218
114176	114176	CHEMBL1552417	COc1cccc(C(=O)Nc2ccccc2C(=O)OCc2cc(=O)n3c(C)csc3n2)c1	0	0	0	0	35.085	28.7069	23.6186
114265	114265	CHEMBL1241361	CC(=O)Oc1ccc(C)cc1C(=O)Nc1ncc(Br)s1	0	0	0	0	33.5649	32.1627	23.9666
114321	114321	CHEMBL1505567	COc1ccccc1N1CCN(C(=O)CSc2nc(C)c(Cc3ccccc3)c(O)n2)CC1	0	0	0	0	53.1452	17.368	25.95
114446	114446	CHEMBL3235314	CC1(C)Oc2ncnc(N)c2N=C1c1ccc([C@H]2CC[C@H](CCC(=O)O)CC2)cc1	0	0	0	0	35.3637	13.0241	14.6165
114490	114490	CHEMBL1180477	CCCCCCCCCCCCCCCCCCOCC1CC(COCCCCCCC[n+]2ccsc2)CO1	0	0	0	0	8.76504	0.538692	21.3958
114694	114694	CHEMBL1554309	COc1ccc(NC(=O)Cn2c(=O)n(CCCCCC(=O)NCc3ccc4c(c3)OCO4)c(=O)c3sccc32)cc1Cl	0	0	0	0	38.2461	31.805	21.9048
114699	114699	CHEMBL3207314	COc1cc(/C=c2\sc3nc(-c4ccncc4)nn3c2=O)ccc1OC(C)=O	0	2	0	0	46.6694	38.0409	36.505
114870	114870	CHEMBL495336	COc1ccc(Cl)cc1Nc1nc2c(s1)CCCc1nc(NC(=O)C(C)(C)C)sc1-2	0	0	0	0	40.2467	12.4381	17.7576
115058	115058	CHEMBL1562086	CCOc1cccc2cc(C(=O)Nc3nccs3)c(=O)oc12	0	0	0	0	33.6813	31.754	27.0115
115118	115118	CHEMBL3330925	COc1ccc(NC(=O)CN2CCN(c3nn4c(C)nnc4c4ccccc34)CC2)cc1	0	0	0	0	36.9687	15.7512	21.4625
115171	115171	CHEMBL411643	COc1ccc(C)c(OC(CCN2CCC(n3c(=O)n(Cn4cncn4)c4ccccc43)CC2)C(C)C)c1	0	0	0	0	34.2833	14.0952	24.2859
115186	115186	CHEMBL1398107	COc1cc(NC(=O)CSc2nc(-c3ccc(C)cc3)nc3c2Cc2ccccc2O3)cc(OC)c1	0	0	0	0	34.4315	27.0981	23.8207
115308	115308	CHEMBL1404257	O=C(CSc1nc(-c2ccc(F)cc2)[nH]c1-c1ccc(F)cc1)Nc1ccc2c(c1)OCCO2	0	0	0	0	34.6749	29.3519	26.0459
115336	115336	CHEMBL1310743	COc1ccc(CCNC(=O)C(=O)Nc2nccs2)cc1OC	0	0	0	0	35.5381	33.2245	27.1779
115457	115457	CHEMBL1577987	CC(C)CCNC(=O)CN(Cc1ccco1)C(=O)CCC(=O)Nc1nccs1	0	0	0	0	54.0626	16.7973	23.6777
115615	115615	CHEMBL1236300	C[C@H]1O[C@@H](c2nc(C(N)=O)cs2)[C@H](O)[C@@H]1O	0	0	0	0	7.84741	1.88431	2.59511
115633	115633	CHEMBL1434180	COc1ccc(Cl)cc1NC(=O)CCS(=O)(=O)c1nc(-c2cccs2)cc(C(F)(F)F)n1	0	0	0	0	28.1468	24.7282	17.8372
115634	115634	CHEMBL1773564	COc1ccc(COc2nccc(-c3ccc4nc(NC(C)=O)sc4c3)n2)cc1	0	0	3	0	35.1235	28.9634	24.5581
115635	115635	CHEMBL1417729	COc1ccc(-n2c(=O)c3c4c(sc3n(C)c2=O)CN(C(C)=O)CC4)cc1	0	0	0	0	33.8486	26.9524	29.4136
115843	115843	CHEMBL1901426	COc1cc2c(cc1OC)-c1cc(NCc3ccc(F)cc3)nc(=O)n1CC2	0	0	0	0	32.7003	22.0309	23.4769
115890	115890	CHEMBL1975801	CCOC(=O)C1=C(C)N=c2s/c(=C/c3ccc(OCC(=O)O)c(OC)c3)c(=O)n2C1c1ccc(Cl)cc1	1	0	0	0	37.7688	35.2675	21.1759
116221	116221	CHEMBL1492105	CCC(Sc1nnc2c(n1)[nH]c1ccccc12)C(=O)Nc1ccccc1OC	0	0	0	0	50.2691	39.0737	30.9617
116449	116449	CHEMBL1475490	Cc1csc2nc(COC(=O)c3ccc(NC(=O)COc4ccccc4F)cc3)cc(=O)n12	0	0	0	0	35.6325	29.3698	23.454
116681	116681	CHEMBL1536420	COCCn1c(SCC(=O)NCCc2ccc(OC)c(OC)c2)nc2c3ccccc3nc-2c1O	0	0	0	0	35.4897	29.6569	26.3676
116796	116796	CHEMBL2237264	COc1cc(C2SCC(=O)N2c2ccccc2-c2nc3ccc(C)cc3[nH]2)cc(OC)c1OC	0	0	0	0	54.8417	17.5108	28.1402
116910	116910	CHEMBL1977430	COc1ccc2c(c1)/C(=C\c1c(Cl)nc3n1CCS3)C(=O)N2	0	0	0	0	33.7769	29.1676	20.6751
117250	117250	CHEMBL1593594	CCOc1ccc(CCNC(=O)Cn2ncn3c(cc4sc(C)cc43)c2=O)cc1OCC	0	0	0	0	47.2623	38.4043	32.0623
117414	117414	CHEMBL1940364	COc1ccc([C@@H](C)N[C@@H]2CC[C@H](C(=O)N3CCN(c4nccs4)CC3)[C@@H](c3ccsc3)C2)cc1	0	0	0	4	39.2306	11.697	20.4343
117481	117481	CHEMBL2234579	COc1cccc2sc(-n3c(-c4ccccc4)nc4ccccc4c3=O)nc12	0	0	0	0	32.6776	26.6568	29.042
117697	117697	CHEMBL3330820	COc1ccc(-n2cnc3c(-c4ccccc4Cl)csc3c2=O)cc1	0	0	0	0	32.4088	26.0412	31.6995
117854	117854	CHEMBL1548693	COc1ccc(-c2csc(NC(C)=O)n2)cc1OC	0	0	0	0	32.9969	31.1689	26.1957
118350	118350	CHEMBL1529457	COc1ccc(NC(=O)Cn2cnc3sc(C)c(S(=O)(=O)N4CCN(C)CC4)c3c2=O)cc1Cl	0	0	0	0	15.9877	12.7381	12.1771
118624	118624	CHEMBL1538755	COc1cc2c(cc1OC)-c1cc(NC3CC3)nc(=O)n1CC2	0	0	0	0	40.7847	14.4137	23.4182
118663	118663	CHEMBL202241	COc1cc2c(Nc3ncc(CC(=O)Nc4cccc(F)c4)s3)ncnc2cc1OCCCN1CCOCC1	0	0	3	0	34.6228	10.2762	20.123
118732	118732	CHEMBL1495326	COCCN(C(=O)CSc1nc2cc(OC)ccc2[nH]1)c1c(N)n(Cc2ccccc2)c(=O)[nH]c1=O	0	0	0	0	26.3367	20.0965	19.9017
118782	118782	CHEMBL2001219	COc1cc(S(=O)(=O)Nc2ccc(-c3csc(N4C(=O)C(C)SC4c4cccs4)n3)cc2)ccc1Cl	0	0	0	0	16.8602	16.8713	13.2625
118856	118856	CHEMBL235977	Cc1ccc(-n2cnc3c(sc4ncc5c(c43)NC[C@@H](C)O5)c2=O)cc1	0	0	0	0	28.4573	21.9936	19.6097
118940	118940	CHEMBL169120	CCCc1c(OCCCOc2ccc(-c3csc(N)n3)c(OC)c2CCC)ccc2c1OC(C(=O)O)CC2	0	0	0	4	26.6389	19.3674	14.4145
119322	119322	CHEMBL3194096	COc1cc(/C=N/n2c(SC)nnc(C(C)(C)C)c2=O)ccc1O	0	0	0	0	57.21	18.4423	28.9937
119329	119329	CHEMBL1384363	COc1ccc(OC)c(-c2csc(NC(=O)Cc3ccc(OC)c(OC)c3)n2)c1	0	0	0	0	34.2785	32.0043	26.9823
119393	119393	CHEMBL3343155	COc1ccccc1N1CCN(CC(=O)N2CCN(c3nnc(-c4ccc(Cl)cc4)c(-c4ccc(Cl)cc4)n3)CC2)CC1	0	0	0	0	35.1788	14.3357	28.2691
119540	119540	CHEMBL1442420	COc1ccc(CSc2nnc3n(C)c(=O)c4c5c(sc4n23)CCCC5)cc1	0	0	0	0	47.6874	38.5711	38.7635
119586	119586	CHEMBL3746071	CCC(C)(C)C(=O)N1CCC[C@@H](n2nc(-c3ccc(Oc4ccccc4)cc3)c3c(N)ncnc32)C1	0	0	0	0	35.9713	15.2411	21.0248
119590	119590	CHEMBL3746685	CC(=O)N1CCC[C@@H](n2nc(-c3ccc(Oc4ccccc4)cc3)c3c(N)ncnc32)C1	0	0	0	0	36.9031	15.5454	21.4096
119625	119625	CHEMBL1319349	CCn1c2ccccc2c2cc(NC(=O)CSc3nnc(-c4ccccc4OC)n3N)ccc21	0	0	0	0	33.249	19.9561	21.5598
119807	119807	CHEMBL1396306	COc1cc2ncnc(N(C)Cc3cccs3)c2cc1-c1ccc2c(c1)OCO2	0	0	3	0	32.9309	26.0263	36.1395
119810	119810	CHEMBL1541260	CCc1nc(SCC(=O)c2ccc3c(c2)OCCO3)c2ccccc2n1	0	0	0	0	33.1219	25.5485	26.982
120170	120170	CHEMBL1559795	Cc1cc2occ(CC(=O)Nc3nccs3)c2cc1C(C)C	0	0	0	0	58.1119	18.1561	25.6241
120257	120257	CHEMBL564979	Cc1ccc(CCC(=O)Nc2ncc(Cc3cc(Cl)ccc3Cl)s2)o1	0	0	0	0	34.9776	33.1873	22.6379
120564	120564	CHEMBL263011	c1ccc(Cc2nc(-c3ccc(N4CCC(Oc5ccccc5)CC4)nn3)no2)cc1	0	0	0	0	50.5525	23.3815	33.8649
120607	120607	CHEMBL1378460	CN(C(=O)COc1ccccc1)c1nc(-c2ccc(F)cc2)cs1	0	0	0	0	33.9204	31.4409	30.5956
120711	120711	CHEMBL1865486	COc1cccc(CNc2nc3cc(-c4cccc(Cl)c4)sc3c(=O)n2C)c1OC	0	0	0	0	28.6483	22.2798	17.4799
120990	120990	CHEMBL524998	COc1ccc(C[C@@H](CN)NC(=O)c2cc(Br)c(-c3ccnc4[nH]ccc34)s2)cc1	0	0	3	0	26.7942	20.0099	19.2508
121076	121076	CHEMBL2041164	COc1cc(N2C(=O)N(c3ccc(-c4csc(C(=O)O)c4)cc3)C(=O)C23CCN(Cc2ncccc2C)CC3)ncn1	0	0	0	0	36.5731	11.7963	14.8763
121079	121079	CHEMBL456009	COc1cccc2nc(-c3cccs3)nc(NN3C(=O)CC(C)C3=O)c12	0	0	0	0	49.3122	40.4046	30.9892
121264	121264	CHEMBL1374140	CCN(CC)C(=O)Cn1cnc2sc(C(=O)N3CCN(c4ccc(OC)cc4)CC3)c(C)c2c1=O	0	0	0	0	53.2477	15.9842	32.3655
121928	121928	CHEMBL3752923	CN(C(=O)Oc1cccc(-c2cc(-c3ccccc3)nc(N)n2)c1)c1ccccc1	0	0	0	0	32.069	21.6872	21.7638
122095	122095	CHEMBL2332840	O=C(Nc1ccc(Oc2ncnc3[nH]ncc23)cc1)Nc1ccc(Cl)c(C(F)(F)F)c1	0	0	3	0	51.7817	37.4036	26.5013
122654	122654	CHEMBL552985	Br.Br.CCCn1c(=O)c2nc(-c3ccc(OCC(=O)NCCNC(=O)C(N)CCCCN)cc3)[nH]c2n(CCC)c1=S	0	0	0	0	24.6951	16.2944	18.151
122813	122813	CHEMBL3194556	CCOC(=O)C1=C(C)N=c2s/c(=C/c3ccc(OCC(=O)O)cc3)c(=O)n2C1c1ccc(F)cc1	0	0	0	0	37.9126	35.3971	20.7162
122827	122827	CHEMBL228110	CCCCN(CC)c1nc(C)nc2c1NC(=O)CN2c1ccc(OC)cc1C	0	0	0	0	37.9969	27.5913	25.3225
123019	123019	CHEMBL1413625	COc1ccc(OC)c(NC(=O)CSc2ncnc3c2cnn3-c2ccccc2Cl)c1	0	0	0	4	49.349	39.7619	26.4924
123258	123258	CHEMBL469962	COc1c(F)cccc1-c1cc(NC(C)=O)nc(-n2nc(C)cc2C)n1	0	0	0	0	53.7671	36.4468	31.1305
123718	123718	CHEMBL1928275	CCN1CCN(S(=O)(=O)c2cnc(OCCOC)c(-c3nc4c5n(nc4c(=O)[nH]3)CCCC5)c2)CC1	0	0	0	0	16.0621	12.9725	14.2401
123738	123738	CHEMBL1928274	CCCOc1ncc(S(=O)(=O)N2CCN(CC)CC2)cc1-c1nc2c3n(nc2c(=O)[nH]1)CCCC3	0	0	0	0	16.0138	12.9798	14.2573
123761	123761	CHEMBL327895	CCOC(=O)c1nc(O)c2cc3cc4c(cc3nc2n1)OCO4	0	0	0	0	36.3872	26.4619	25.9217
123889	123889	CHEMBL356225	O=C(CN1[C@H](COc2ccccc2)[C@H](O)[C@@H](O)[C@@H](COc2ccccc2)N(CC(=O)Nc2nccs2)S1(=O)=O)Nc1nccs1	1	0	0	0	17.8226	17.3708	17.2109
123947	123947	CHEMBL1560811	COc1ccc(-c2nc3c(c4nnc(SC(C)C(=O)Nc5ccc(C)cc5)n24)COC(C)(C)C3)cc1	0	0	0	0	53.9702	17.3723	25.9241
124168	124168	CHEMBL562389	COc1ccc(/C=N/c2nc3[nH]nc(C)n3c(=O)c2S(=O)(=O)Nc2ccc(OC)cc2)cc1	0	0	0	0	21.9287	21.1334	18.5926
124503	124503	CHEMBL2207750	CC(=O)N1CC2CC1CN2Cc1ccc(Oc2nc3ncccc3s2)cc1	1	0	0	0	39.1785	11.3952	24.6323
124533	124533	CHEMBL1976959	COc1ccc(C(=O)Sc2c(-c3ccccc3)c(=O)n(-c3ccccc3)c(=S)n2-c2ccccc2)cc1	0	0	0	0	33.5779	25.7574	28.8207
124589	124589	CHEMBL232027	COc1ccc(-c2cc3ncn([C@H]4CCN(C(=O)N(C)[C@H]5CCN(C)C5)C4)c(=O)c3s2)c(C)c1	0	0	0	4	36.7804	10.6398	23.9358
124605	124605	CHEMBL1592572	COc1ccc(-c2cn3c(n2)sc2cc(C(=O)Nc4ccc(C)c(C)c4)ccc23)cc1	0	0	0	0	34.6806	30.5877	24.0137
124639	124639	CHEMBL1684549	O=C(Cn1c(-c2ccsc2)nc2ccc(OCCCN3CCOCC3)cc2c1=O)NCC1CC1	0	0	0	0	36.6289	11.3548	18.9813
124714	124714	CHEMBL1982019	COc1cc(S(=O)(=O)Nc2nc(-c3ccc(N4C(=O)/C(=C/C=C/c5ccccc5)N=C4c4ccccc4)cc3)cs2)ccc1Cl	0	0	0	0	28.0343	26.9068	18.2803
124842	124842	CHEMBL1316029	COc1ccc(Cl)cc1NC(=O)Cn1c(=O)n2nc(-c3ccccc3)nc2c2ccccc21	0	0	0	0	51.4191	36.4242	26.0454
124875	124875	CHEMBL1432082	COc1ccc(Cl)cc1C(=O)C1CCCN(Cc2cnc(N3CCOCC3)s2)C1	0	0	0	0	40.1923	11.1323	28.2592
125023	125023	CHEMBL270490	Cc1cc(-c2cc(OC(=O)C(C)(C)C)ccc2Cl)cc2nnc(Nc3ccc(OCCN4CCCC4)cc3)nc12	0	0	3	0	32.3625	14.324	16.256
125024	125024	CHEMBL3765538	O=C(/C=C/c1cc(Br)c(O)c(Br)c1)Nc1cc2c(Nc3ccc(F)c(Cl)c3)ncnc2cc1O[C@H]1CCOC1	0	0	0	0	35.1089	12.9269	16.6624
125051	125051	CHEMBL1321929	COc1ccc(N2CCN(C(=O)CSc3nnc4c(C)cc5ccccc5n34)CC2)cc1	0	0	0	0	53.2252	16.4395	31.959
125243	125243	CHEMBL412264	COc1ccc(/N=c2\scc(CC(=O)Nc3ccc(Cl)cc3)n2CCO)cc1	0	0	0	0	36.1225	33.4235	22.0898
125288	125288	CHEMBL3786127	COc1cc2c(cc1Nc1ncc(Cl)c(Nc3ccccc3S(=O)(=O)C(C)C)n1)CC/C(=N\NC(N)=O)C2(C)C	0	0	3	0	13.772	11.1937	10.9637
125306	125306	CHEMBL369356	COc1cc(NS(=O)(=O)c2ccc(-n3sc4ccccc4c3=O)cc2)ncn1	0	0	0	0	22.621	20.7117	18.012
125803	125803	CHEMBL2018993	COc1ccc(C=NNC(=O)Cn2c(CSc3ccccc3)nc3ccccc32)c(OC)c1	0	0	0	0	49.1747	38.7781	30.5868
125820	125820	CHEMBL1998023	O=[N+]([O-])[O-].c1c(N2CCOCC2)s[s+]c1N1CCOCC1	0	0	0	0	4.72314	2.90552	14.1055
125929	125929	CHEMBL126187	CCOc1cc2ncnc(Nc3ccc(Cl)c(-c4csc(C)n4)c3)c2cc1OCC	0	0	0	0	27.5833	19.669	36.8092
126453	126453	CHEMBL1345725	COc1cccc(-n2nnc3c(=O)n(Cc4ccc(F)cc4)cnc32)c1	0	0	0	0	50.2247	33.9463	37.442
126605	126605	CHEMBL2311746	COc1ccc(OC)c(-c2cc(NC(C)=O)nc(-c3cc(OC)ccc3OC)n2)c1	0	0	0	0	36.6304	26.634	24.3127
126976	126976	CHEMBL3754574	Nc1nc(-c2ccccc2)cc(-c2cccc(OC(=O)N(c3ccccc3)c3ccccc3)c2)n1	0	0	0	0	32.1525	21.7356	21.8654
127092	127092	CHEMBL1439996	CCOC(=O)Cn1nnnc1CN(Cc1ccc(OC)cc1)Cc1cc2cc(CC)ccc2nc1O	0	0	0	0	34.7119	21.5862	22.713
127420	127420	CHEMBL257256	CCCSc1nc(NC(C)=O)cc(OCc2cccc(Cl)c2)n1	0	0	0	0	33.7643	26.149	19.7988
127460	127460	CHEMBL1477539	COc1ccc(Cl)c2sc(N3CCN(C(=O)C4=COCCO4)CC3)nc12	0	0	0	0	53.6397	15.4639	35.3766
127635	127635	CHEMBL515846	CCCN1CCC(c2ccc(Nc3nc(Nc4ccsc4C(N)=O)c4cc[nH]c4n3)c(OC)c2)CC1	0	0	3	0	36.4935	11.2407	19.2245
128030	128030	CHEMBL3471077	Cc1nc(CN2C[C@@H]3CN(C(=O)CC(F)(F)F)C[C@@H]3C2=O)cs1	0	0	0	0	10.1179	1.25311	16.0217
128068	128068	CHEMBL1453552	Cl.O=C(c1ccco1)N(CCCN1CCOCC1)c1nc(-c2ccc(Cl)cc2)cs1	0	0	0	0	40.1173	11.0918	27.7772
128095	128095	CHEMBL446889	Cc1nc2cc(OC[C@H](O)CN3CCN(Cc4noc(-c5ccc(OC(F)(F)F)cc5)n4)CC3)ccc2s1	0	0	0	0	37.1007	11.1343	19.1691
128241	128241	CHEMBL1982888	O=C(O)c1ccc(-c2ccc(/C=c3/sc4nc5ccccc5n4c3=O)o2)cc1Cl	1	0	3	4	35.6124	31.1176	19.5669
128362	128362	CHEMBL1522776	COc1ccc(CNC(=O)CCc2nnc3ccc(NCCCN4CCCC4=O)nn23)cc1	0	0	0	0	31.646	19.6312	21.1731
128468	128468	CHEMBL1582353	CCCCn1nc(NC(=O)c2cccs2)c2cc3cc(OC)ccc3nc21	0	0	0	0	49.359	40.0852	30.0478
129129	129129	CHEMBL1538663	COCCCNC(=O)Cn1c(=O)n(CC(=O)NCCc2ccc(OC)c(OC)c2)c(=O)c2sccc21	0	0	0	0	36.2655	29.3963	26.6293
129259	129259	CHEMBL1374781	CCc1c(O)nc(SCC(=O)N2CCc3cc(OC)c(OC)cc3[C@@H]2C)nc1O	0	0	0	0	34.6938	26.7499	25.5891
129273	129273	CHEMBL1702599	CCCCNc1c(-c2ccc(-c3cc(C(C)=O)cs3)c(OC)c2)nc2ccccn12	0	0	0	0	27.7689	21.3082	19.7646
129591	129591	CHEMBL67957	COC(=O)C(Oc1nc(OC)cc(OC)n1)C(C)(Oc1ccc(SC)cc1)c1ccccc1	0	0	0	0	33.077	24.9141	27.8928
129818	129818	CHEMBL2148044	CS(=O)(=O)CC(=O)NCCn1ccc2ncnc(Nc3ccc(Oc4cccc(C(F)(F)F)c4)c(Cl)c3)c21	0	0	3	0	26.0444	20.2195	16.0938
129855	129855	CHEMBL22100	CCS(=O)(=O)N[C@H](CC1CCCCC1)C(=O)N1CCC[C@H]1C(=O)N[C@@H](CC1CCNCC1)C(=O)c1nccs1	1	0	0	0	5.45888	3.593	2.82915
129946	129946	CHEMBL488164	COc1ccc2c(c1)/C(=C\c1c(-c3ccc(C)cc3)nc3sc(C)cn13)C(=O)N2	0	0	0	0	33.5172	29.8854	23.7324
130186	130186	CHEMBL402919	COc1ccc(-n2c(SC)nc3sc4c(c3c2=O)CC(C)CC4)cc1OC	0	0	0	0	32.9982	26.2085	27.3116
130783	130783	CHEMBL35154	COc1cc2c(cc1OC)-c1cc(Nc3c(C)cccc3C(C)(C)C)nc(=O)n1CC2	0	0	0	0	40.8451	14.5106	23.5887
131043	131043	CHEMBL482431	COc1cc(C)nc(N2C(=O)CSC2c2c(F)cccc2Cl)n1	0	0	0	0	56.6932	17.2067	37.1905
131482	131482	CHEMBL1865266	CCN(Cc1ccc2c(c1)OCO2)C(=O)CSc1ncnc2sccc12	0	0	0	0	33.7887	26.7695	28.1403
131555	131555	CHEMBL11900	CCc1cc2c(=O)n(N)c(SCCCN3CCN(c4ccccc4OC)CC3)nc2s1	0	0	0	0	38.2753	11.795	19.6757
131644	131644	CHEMBL3824209	COc1cc(-c2ncn(C)c2-c2ccc3c(c2)c(Cl)cn3C)cc(Br)c1OC.Cl	0	0	0	0	43.6123	29.5158	38.1915
131789	131789	CHEMBL1939797	COc1cc(C)c2nc3[nH]nc(C)c3c(N3CCC(C(N)=O)CC3)c2c1	0	0	0	0	53.002	23.9343	27.4887
131923	131923	CHEMBL261744	COc1cc(Nc2nn3c(N4CCC[C@H]4CO)cc(C4CC4)nc3c2C(N)=O)cc(OC)c1	0	0	3	0	36.2093	15.0463	21.1324
131942	131942	CHEMBL1928597	COc1cc(C2c3c(nc[nH]c3=O)Oc3[nH]c(=S)[nH]c(=O)c32)cc(OC)c1OC	0	0	0	0	33.8016	25.1161	25.3972
132169	132169	CHEMBL1446331	CCOc1cccc(C(=O)Nc2nccs2)c1	0	0	0	0	33.5197	32.189	23.8794
132735	132735	CHEMBL1398261	CCOc1ccc(-n2c(=O)c3c4c(sc3n(CC(=O)NCCCOC)c2=O)CCCCC4)cc1	0	0	0	0	34.9429	28.3103	23.3719
133034	133034	CHEMBL1396646	COc1cc(NC(=O)CSc2nc3nc(C)c(Cc4ccc(C)cc4)c(C)n3n2)cc(OC)c1OC	0	0	0	0	50.2314	38.5767	32.642
133135	133135	CHEMBL2003583	COc1ccc(S(=O)(=O)Nc2ccc(-c3csc(N4C(=O)/C(=C/C=C\c5ccccc5)N=C4c4ccccc4)n3)cc2)cc1Cl	0	0	0	0	27.7247	26.5844	18.0933
133164	133164	CHEMBL1465680	COC(=O)Cn1cnc2sc(C)c(S(=O)(=O)N3CCN(c4ccccc4OC)CC3)c2c1=O	0	0	0	0	17.4039	15.7253	19.2764
133381	133381	CHEMBL256996	C[C@H](Oc1cccc2ncnc(Nc3ccc4c(cnn4Cc4cscn4)c3)c12)C(=O)N(C)C	0	0	3	0	34.5608	20.6141	22.3608
133410	133410	CHEMBL1512085	CCOc1ccc(NC(=O)CCc2c(C)nc3c(-c4ccccc4)c(C)nn3c2C)cc1	0	0	0	0	51.2238	36.0649	30.4408
133418	133418	CHEMBL2093361	O=C(Nc1nc(-c2ccc3c(c2)OCCO3)cs1)C1CCN(S(=O)(=O)c2ccc(Cl)cc2)CC1	0	0	0	0	17.4381	17.4578	13.6922
133442	133442	CHEMBL1599308	Brc1ccc(-c2nnc3sc(CNCc4ccc5c(c4)OCO5)cn23)cc1	0	0	0	0	34.332	19.3259	34.3778
133778	133778	CHEMBL1721157	NC(=O)C1CCN(c2ncc(-c3ccc4c(c3)OCCCO4)s2)CC1	0	0	0	0	54.6159	16.6971	27.4143
134301	134301	CHEMBL1813642	O=C(Nc1ccc(Oc2ncnc3sc4c(c23)CCC4)c(F)c1)c1cccn(-c2ccc(F)cc2)c1=O	0	0	3	0	34.4702	28.0303	23.0652
134357	134357	CHEMBL1934652	COc1cncc(-c2nc(NC(C)(C)CO)nc3sc(C(N)=O)c(N)c23)c1	0	0	3	0	40.1433	12.368	20.5671
134419	134419	CHEMBL2282683	COc1cc(/C=N/N=c2\scc(C3=CC(=O)C=CC3=O)n2-c2ccc(Cl)cc2)ccc1O	0	0	0	0	40.8728	37.1409	23.701
134610	134610	CHEMBL132572	Clc1ccc2c(c1)S[C@H](Cn1ccnc1)[C@@H]2OCc1cnc2cc3c(cc2c1Cl)OCO3	0	0	0	0	34.4578	29.3113	34.4865
134723	134723	CHEMBL1591452	CCOc1ccc(NC(=O)CSc2ncc3c(n2)-c2ccc(Cl)cc2N(Cc2ccccc2)S3(=O)=O)cc1	0	0	0	0	26.8552	23.6282	17.17
134891	134891	CHEMBL256786	O=C(Cc1ccccc1)NC(=S)Nc1ccc(Oc2ccnc3cc(-c4cncnc4)sc23)c(F)c1	0	0	3	0	26.9777	20.1165	19.7568
134906	134906	CHEMBL1315101	COc1cccc(CNC(=O)c2nc(Cn3nc(C)c(Br)c3C)no2)c1	0	0	0	0	49.3502	33.9571	29.6736
134990	134990	CHEMBL3350091	O=C(CN1[C@@H](COc2ccccc2)[C@@H](O)[C@H](O)[C@H](COc2ccccc2)N(Cc2ccc(-c3cccs3)cc2)S1(=O)=O)Nc1nccs1	1	0	0	0	17.5883	17.194	16.6722
135013	135013	CHEMBL1514035	Oc1c(C(c2ccccc2Cl)N2CCC(O)CC2)sc2nc(-c3ccco3)nn12	0	0	0	0	39.7347	12.4425	18.3935
135047	135047	CHEMBL279376	Cc1ncnc(C)c1OCC(=O)N[C@H](Cc1ccccc1)[C@H](O)C[C@@H](Cc1ccccc1)NC(=O)[C@@H](C(C)C)N1CCCNC1=O	0	0	0	0	47.7671	16.8089	24.453
135157	135157	CHEMBL1418286	COc1ccc(N2CC(=O)C(c3nc(-c4ccc(F)cc4)cs3)=C2N)cc1Cl	0	0	0	0	29.6606	22.0931	17.3561
135242	135242	CHEMBL1360779	COc1ccc(N2CCN(C(=O)CSc3nnc4c(C)cc5cc(C)ccc5n34)CC2)cc1	0	0	0	0	53.1769	16.4208	31.9676
135263	135263	CHEMBL258897	COc1ccc(C)c(OC(CCN2CCC(n3c(=O)n(Cc4nnc(C)[nH]4)c4ccccc43)CC2)C(C)C)c1	0	0	0	0	33.5579	14.1329	20.1954
135383	135383	CHEMBL1957672	CCCC(=O)Nc1nc(-c2nc(C)cs2)c(-c2ccc3c(c2)OCO3)[nH]1	0	0	3	0	33.2975	28.9069	25.864
135458	135458	CHEMBL259262	COc1ccc(C)c(OC(CCN2CCC(n3c(=O)n(Cc4nnn[nH]4)c4ccccc43)CC2)C(C)C)c1	0	0	0	0	33.5952	14.2485	20.2233
135632	135632	CHEMBL421448	CN(CCOc1ccc(CC2SC(=O)NC2=O)cc1)c1nc(-c2ccccc2)cs1	0	0	0	0	51.8902	15.909	24.922
135881	135881	CHEMBL1991109	COc1ccc(-c2nc(SCC(=O)N/N=C/c3ccc(N(C)C)cc3)[nH]c2-c2ccc(OC)cc2)cc1	0	0	0	0	49.2563	38.5092	30.6377
135959	135959	CHEMBL1520377	O=C(CCSc1nc(-c2ccc3c(c2)OCO3)cc(C(F)(F)F)n1)NCc1ccccc1	0	0	0	0	35.0421	27.4972	25.7129
135971	135971	CHEMBL1964261	C[C@@H](Oc1cc(-n2cnc3ccc(OCCCN(C)C)cc32)sc1C(N)=O)c1ccccc1Cl	0	0	3	0	27.1939	20.453	16.8108
136067	136067	CHEMBL3805461	C#Cc1cccc(Nc2ncnc3cc(OCCOC)c4c(c23)OCCO4)c1	0	0	3	0	32.5435	20.8102	34.7825
136202	136202	CHEMBL1564116	CCCCCCC(=O)Nc1nc(C)c(-c2csc(Nc3cc(Cl)ccc3OC)n2)s1	0	0	0	0	28.8228	21.6801	17.2751
136354	136354	CHEMBL502283	Nc1nc(-c2c[nH]c3nccc(Oc4ccc(NC(=O)NC(=O)Cc5ccc(F)cc5)cc4F)c23)cs1	0	0	3	0	26.335	19.2389	19.3356
136412	136412	CHEMBL1580967	COc1ccc(-n2c(SCC(=O)Nc3cccc(S(N)(=O)=O)c3)nc3ccccc3c2=O)cc1OC	0	0	0	0	26.3628	22.829	22.0427
136822	136822	CHEMBL1434846	COc1ccc(NC(=O)c2nc3nc(C)cc(C(F)F)n3n2)c(C)c1	0	0	0	0	53.0931	36.1287	31.0414
136872	136872	CHEMBL1417164	COc1ccc(C)cc1NC(=O)CSc1nc(=O)[nH]c2c1CCCC2	0	0	0	0	34.5738	27.0254	24.1342
136928	136928	CHEMBL1462193	COc1ccc(-n2c(SCC(=O)N3CCCC3)nc3c4ccccc4nc-3c2O)cc1	0	0	0	0	55.192	18.0867	26.6829
137143	137143	CHEMBL2098354	O=C(COc1ccc(Br)cc1Cl)Nc1nc(-c2ccccn2)cs1	0	0	0	0	33.8474	31.0849	20.9259
137369	137369	CHEMBL3945242	COc1cc(-n2cnc3cc(-c4ccc(Cl)cc4)sc3c2=O)ccc1OCC1(OP(=O)(O)O)CC(F)(F)C1	0	0	0	4	52.1639	16.8165	21.8224
137519	137519	CHEMBL1340434	Cc1c(C(N)=O)sc2ncn(CCOc3ccccc3)c(=O)c12	0	0	0	0	33.9163	27.5276	22.6299
137928	137928	CHEMBL1086932	Cc1c(C(=O)Nc2ccc(Oc3ccnc4cc(-c5cn(C)cn5)sc34)c(F)c2)cnn1-c1ccccc1	0	0	3	0	46.7453	38.4329	28.9533
138077	138077	CHEMBL1088136	CCCN1CNc2c(c(=O)[nH]c(=S)n2CCc2cccc(OC)c2OC)C1	0	0	0	0	31.0917	21.7736	22.9125
138217	138217	CHEMBL1171131	COc1ccc2c(O[C@@H]3C[C@H]4C(=O)N[C@]5(C(=O)NS(=O)(=O)C6CC6)C[C@H]5/C=C\CCCCN(C)C(=O)[C@@H]4C3)nc(-c3nc(C(C)C)cs3)nc2c1	0	0	0	0	10.2923	9.76674	11.7839
138271	138271	CHEMBL3918669	COC[C@H]1N(c2nc(-c3cccc(C)c3OCc3cc(C)c4c(c3)CCN(C3COC3)C4)cs2)C[C@@H]2C[C@]12C(=O)O	0	0	0	0	24.6713	7.71287	19.2861
138441	138441	CHEMBL1591532	COc1ccc(-c2cc(C(F)(F)F)n3nc(C(=O)Nc4sc5c(c4C#N)CCC(C)C5)cc3n2)cc1OC	0	0	0	0	47.4232	38.5935	32.1203
138643	138643	CHEMBL1530080	Cc1cc2nc3s/c(=C/c4ccc(-c5ccccc5C(=O)O)o4)c(=O)n3c2cc1C	0	0	0	0	35.2684	31.1997	18.8577
138770	138770	CHEMBL247641	COc1ccc(Cl)cc1-c1csc(NC(=O)c2ccc(Nc3ccncn3)cc2)n1	0	0	0	0	27.8677	21.1338	17.0491
138814	138814	CHEMBL1163749	CCOC(=O)c1cc2cc(Nc3ncnc4cc(OCCCN5CCC(C)CC5)c(OC)cc34)ccc2s1	0	0	3	0	36.611	10.9766	21.4672
138919	138919	CHEMBL493326	COc1ccc2ncn(-c3cc(O[C@H](C)c4ccccc4Cl)c(C(N)=O)s3)c2c1	0	0	3	0	34.1561	30.3563	20.9819
139051	139051	CHEMBL1970248	CCOc1ccc(Nc2nc(C)c(C(=O)/C=C/c3ccc(Cl)cc3Cl)s2)cc1	0	0	0	0	29.5777	22.4006	17.8581
139128	139128	CHEMBL3209453	COc1cccc2s/c(=N/C(=O)CS(=O)(=O)c3ccc(Cl)cc3)n(C)c12	0	0	0	0	29.2532	27.534	31.2291
139155	139155	CHEMBL3794258	COc1ccc(-c2csc3ncnc(NCCC(=O)O)c23)cc1OC	0	0	3	0	28.5475	22.2512	15.1362
139206	139206	CHEMBL248939	CCOCCC1(Oc2ccc(Oc3ccc(-c4nc5ccc(Cl)cc5[nH]4)cc3)cc2)C(=O)NC(=O)NC1=O	1	0	0	0	43.2512	32.6995	23.4328
139699	139699	CHEMBL1087602	CC(=O)N1N=C(c2nc(C(C)C)cs2)OC1(C)C	0	0	0	0	9.2899	0.999903	15.7733
139733	139733	CHEMBL484686	COc1ccc(/C=C2\CCCC3=C2Nc2[nH]c(=S)[nH]c(=O)c2C3c2ccc(OC)cc2)cc1	0	0	0	0	30.9597	21.9648	20.9452
139786	139786	CHEMBL514162	COc1cc2ncn(-c3cc(OCc4ccccc4Cl)c(C(N)=O)s3)c2cc1OC	0	0	3	0	34.1884	30.3561	20.9089
139804	139804	CHEMBL1442326	Cc1cnc(NC(=O)COc2ccccc2Cl)s1	0	0	0	0	33.7256	32.3597	21.3335
139819	139819	CHEMBL1465495	CC(C)(C)NC(=O)C(c1ccc(F)cc1)N(Cc1ccco1)C(=O)CCC(=O)Nc1nccs1	0	0	0	0	54.023	16.7698	23.7932
139830	139830	CHEMBL1598932	COc1ccc(Br)cc1C1CC(=O)Nc2c1c(C)nn2-c1nc(C)cc(C)n1	0	0	0	0	53.6715	36.6923	30.9871
140351	140351	CHEMBL1493683	COc1cccc(NC(=O)CSc2nnc(Cc3ccc(C)cc3)c(=O)n2N)c1	0	0	0	0	34.4523	20.7417	21.8093
140479	140479	CHEMBL1481616	COc1ccc(-c2cc3nc4n(c(=O)c3s2)CCC4)cc1	0	2	0	0	32.8314	26.6365	28.9299
140492	140492	CHEMBL2382405	CCC(Sc1nc(-c2cccc(OC)c2)c(C#N)c(=O)[nH]1)C(=O)Nc1ccc(S(N)(=O)=O)cc1	0	0	0	0	26.0519	22.53	19.6991
140715	140715	CHEMBL562577	CS(=O)(=O)c1ccc(Oc2cc(O[C@@H]3CCC[C@H]3O)cc(C(=O)Nc3nccs3)c2)cc1	0	0	0	0	17.7681	17.6288	15.9738
140755	140755	CHEMBL563381	C[C@H](CO)Oc1cc(Oc2ccc(S(C)(=O)=O)cc2)cc(C(=O)Nc2nccs2)c1	0	0	0	0	29.2022	28.524	21.7601
140836	140836	CHEMBL1976793	COc1cc(S(=O)(=O)Nc2ccc(-c3csc(N4C(=O)C(Cl)C4c4ccccc4)n3)cc2)ccc1Cl	0	0	0	0	28.2455	27.2556	18.3794
140980	140980	CHEMBL1570541	COC(=O)c1sc2ncn(CC(=O)NCCc3ccc(OC)c(OC)c3)c(=O)c2c1C	0	0	0	0	34.5025	27.8687	26.0651
141191	141191	CHEMBL229639	COc1cc(Cn2cnc3c(Cl)nc(N)nc32)cc(OC)c1OC	0	0	0	0	33.4884	19.981	40.3691
141221	141221	CHEMBL217844	CN(C)C[C@H]1COc2cc(-n3cnc4cc(-c5ccc(Cl)cc5)sc4c3=O)ccc2O1	0	0	0	4	27.0131	19.8724	26.7542
141736	141736	CHEMBL1435474	Cc1ccc(OCCNC(=O)CCc2nc(O)c3c4c(sc3n2)CCCC4)cc1	0	0	0	0	34.6283	27.7151	24.4814
142080	142080	CHEMBL1557048	c1csc(CNc2ncncc2-c2ccc3c(c2)OCO3)c1	0	0	0	0	27.601	20.4312	31.3022
142104	142104	CHEMBL3190720	COc1cccc(/C=N/NC(=O)c2nc(-c3ccccc3)cc(-c3ccccc3)n2)c1O	0	0	0	0	51.2732	35.9214	32.2539
142147	142147	CHEMBL163407	N=C(N)NCCC[C@H](NC(=O)CN1CCN[C@@H](CCCNC(=N)N)C1=O)C(=O)c1nccs1	1	0	0	0	10.2662	3.99422	3.57947
142369	142369	CHEMBL1869883	COc1cccc(CNc2nc3cc(-c4cnn(Cc5ccccc5)c4)sc3c(=O)n2C)c1	0	0	0	0	33.8711	20.411	21.1138
142493	142493	CHEMBL133600	COc1cc2nc(N3CCN(C(=O)/C=C/c4cccs4)CC3)nc(N)c2cc1OC	0	0	0	0	40.4533	12.2738	22.6166
142797	142797	CHEMBL1371154	COc1ccc(C)cc1NS(=O)(=O)c1ccc2c(c1)n(C)c(=O)n2C	0	0	0	0	21.9048	20.459	18.4705
143083	143083	CHEMBL1258404	COc1ccc([C@@H]2Oc3nc(SC)nnc3-c3ccccc3N2C(C)=O)cc1	0	0	0	0	51.7161	38.303	39.6166
143335	143335	CHEMBL344916	CCS(=O)(=O)N[C@H](CC1CCCCC1)C(=O)N1CCC[C@H]1C(=O)N[C@@H](CCCCN)C(=O)c1nccs1	1	0	0	0	5.92223	3.63043	2.99534
143674	143674	CHEMBL1439826	COc1ccccc1CNC(=O)CSc1ncc2c(n1)-c1ccccc1N(Cc1ccc(C)cc1)S2(=O)=O	0	0	0	0	26.4512	23.027	20.3901
143688	143688	CHEMBL364914	COc1cccc(-c2cn(Cc3c(F)cccc3S(C)(=O)=O)c(=O)n(C[C@H](N)c3ccccc3)c2=O)c1F	0	0	0	0	25.9689	20.3954	19.1435
143740	143740	CHEMBL1332466	COc1ccccc1N1CCN(C(=O)c2sc3nc(C)nc(N4CCN(c5ccccn5)CC4)c3c2C)CC1	0	0	0	0	51.9393	15.5473	31.7635
143905	143905	CHEMBL1256107	Cc1ccc(NC(=O)c2cccc(C(F)(F)F)c2)cc1C(=O)c1cc2c(Nc3ccc(OC(F)(F)F)cc3)ncnc2s1	0	0	3	0	27.1026	20.3651	19.2943
143958	143958	CHEMBL63416	c1nc(NCc2ccc3c(c2)OCO3)c2cc3c(cc2n1)OCO3	0	0	0	0	33.0173	20.9494	34.1929
144080	144080	CHEMBL189918	COc1ccc2c(c1)/C(=C\c1c(C)nc3sc(C)cn13)C(=O)N2C	0	0	0	0	33.2636	28.8541	30.0464
144178	144178	CHEMBL1312663	COc1cccc(-c2nnc(SCC3CNC(=O)O3)n2-c2ccc(Cl)cc2)c1	0	0	0	0	61.9704	42.8881	30.144
144265	144265	CHEMBL595072	C/C(=C\c1csc(C)n1)[C@@H]1C[C@@H]2O[C@@H]2CCC[C@H](C)[C@H](OC(=O)CCCCCCCCC(=O)O[C@H]2[C@@H](C)CCC[C@H]3O[C@H]3C[C@@H](/C(C)=C/c3csc(C)n3)OC(=O)C[C@H](O)C(C)(C)C(=O)[C@@H]2C)[C@@H](C)C(=O)C(C)(C)[C@@H](O)CC(=O)O1	0	0	0	0	7.43256	1.93801	1.59107
144379	144379	CHEMBL1356497	O=c1c(-c2cccs2)nc2cnc(Oc3cccc(Cl)c3)nc2n1C[C@H]1CCCO1	0	0	0	0	54.8119	16.1726	35.9954
144709	144709	CHEMBL1257224	COc1cccc2c1sc1nc(C(=O)NCc3ccc(F)cc3)c(O)c(=O)n12	0	0	0	0	33.8931	27.8768	22.8712
144728	144728	CHEMBL481510	NC(=O)c1sc(-n2cnc3ccc(C(F)(F)F)cc32)cc1OCc1ccccc1Br	0	0	3	0	33.3334	29.5358	23.0869
144790	144790	CHEMBL28182	Cc1nc(-c2cc(C)c(OCCCc3cccc(F)n3)c(C)c2)no1	0	0	0	0	49.7575	32.5729	36.3296
144991	144991	CHEMBL26445	CCSc1nc2c(n1Cc1ccc(OC)cc1)C(=O)N(CC)C1=N[C@@H]3CCC[C@@H]3N12	0	0	0	0	54.5307	17.0282	32.8114
144993	144993	CHEMBL2316095	CCOC(=O)c1nc2c3c(ncn2n1)Oc1cc(OCC)ccc1C3c1ccc(Cl)cc1	0	0	0	0	51.5879	34.5082	42.7255
145077	145077	CHEMBL1571965	CCCN(CCC)C(=O)Cn1c(=O)n(CCCCCC(=O)NCc2ccc3c(c2)OCO3)c(=O)c2sccc21	0	0	0	0	36.0994	29.2407	26.7184
145244	145244	CHEMBL277436	COc1ccc(-c2sc3c(c2CN(C)Cc2ccccc2)c(=O)n(-c2ccc(Cl)cc2)c(=O)n3Cc2c(F)cccc2F)cc1	0	0	0	0	27.6234	20.5051	27.3979
145784	145784	CHEMBL389870	COc1ccc(-n2cnc3c(sc4nccc(N(C)C)c43)c2=O)cn1	0	0	0	0	32.7729	26.6083	29.1305
146057	146057	CHEMBL1969408	CCOC(=O)c1c(SC(=O)c2cc(OC)c(OC)c(OC)c2)n(-c2ccccc2)c(=S)n(-c2ccccc2)c1=O	0	0	0	0	33.634	26.1858	26.9217
146114	146114	CHEMBL271157	COC(=O)C1=C(C)NC(C)=C(C(=O)OC)C1c1c(-c2ccc(OC)cc2OC)nc2sccn12	0	0	0	0	28.9945	21.9841	20.4991
146486	146486	CHEMBL2205528	Cc1ccc(-c2ccc(C(=O)Nc3ncc([N+](=O)[O-])s3)o2)cc1	0	0	0	0	36.6867	18.1948	19.9737
146685	146685	CHEMBL1431188	CCCCCCNc1cc2n(c(=O)n1)CCc1cc(OC)c(OC)cc1-2	0	0	0	0	33.0502	22.5901	23.6559
146727	146727	CHEMBL1536715	COc1ccc(-n2c(C)nc3sc4c(c3c2=O)CCC4)cc1	0	0	0	0	32.5211	25.8258	28.5508
146737	146737	CHEMBL3604940	C=CC(=O)Nc1cccc(Oc2nc(Nc3n[nH]c4ccc(Br)cc34)cc(N3CCN(C)CC3)n2)c1	0	0	3	0	34.8571	14.908	20.6166
146807	146807	CHEMBL3799685	CC(C)c1csc(NC(=O)C2c3ccccc3Oc3ccccc32)n1	0	0	0	0	59.02	18.3075	27.1078
146873	146873	CHEMBL1300955	COc1cccc(C(=O)Nn2c(-c3cccs3)nc3ccccc3c2=O)c1OC	0	0	0	0	48.8739	39.784	33.261
147325	147325	CHEMBL1575308	COc1ccc(OC)c(-c2csc(NC(=O)Cc3ccccc3)n2)c1	0	0	0	0	34.305	32.2543	24.7429
147360	147360	CHEMBL2326570	Cc1nc(C(=O)N[C@@H](CCCNC(=N)N)C(=O)N[C@@H](CC(C)C)C(=O)NCc2cccc(Oc3ccccc3)c2)nn1-c1ccc(Cl)cc1	0	0	3	0	30.7249	13.7725	15.7964
147528	147528	CHEMBL272705	C[C@H](CO)Nc1nc(SCc2ccco2)nc2[nH]c(=O)sc12	0	0	0	0	28.3661	21.6599	18.9282
147656	147656	CHEMBL1725510	COc1ccccc1N1CCN(c2ncnc3sc(C(=O)NCC4CCCO4)c(C)c23)CC1	0	0	0	0	53.3273	16.9116	24.6419
148357	148357	CHEMBL426506	COc1ccc(Nc2ncc3c(n2)N2CCC(=O)N2C(c2c(Cl)cccc2Cl)=C3)cc1	0	0	3	0	35.3885	22.4391	18.7825
148363	148363	CHEMBL208549	COc1ccc(-n2nc(C#N)c3ncn(-c4ccc(-c5ccccc5S(N)(=O)=O)cc4)c(=O)c32)cc1	1	0	0	0	23.5353	22.2364	18.6959
148417	148417	CHEMBL1086155	CC(=O)N(C)CCc1cc(Br)c(OCCCNc2ncn(C)c3ncnc2-3)c(Br)c1	0	0	0	0	32.1258	20.7835	21.9515
148639	148639	CHEMBL1481548	COc1ccc(OC)c(NC(=O)CSc2nc3nnc(C)c-3c(N)n2-c2cccc(Cl)c2C)c1	0	0	0	0	34.4326	20.9937	18.3112
148693	148693	CHEMBL217535	O=c1c2sc(-c3ccc(Cl)cc3)cc2ncn1-c1ccc2c(c1)OC[C@@H](CN1CCCC1)O2	0	0	0	4	38.403	10.8457	27.6231
148749	148749	CHEMBL1911500	COc1ccc(-c2ncn(C)c2-c2cc(Cl)c(OC)c(OC)c2)cc1F.Cl	0	0	0	0	44.0507	28.9724	38.0557
148779	148779	CHEMBL1457225	COc1ccc2nc(NC(=O)c3nc(S(=O)(=O)Cc4ccccc4)ncc3Cl)sc2c1	0	0	0	0	28.3574	26.2066	18.4553
149321	149321	CHEMBL3189373	COc1cccc(C2C3=C(N=c4s/c(=C\c5ccc(OCC(=O)O)cc5)c(=O)n42)c2ccccc2CC3)c1	0	0	0	0	38.112	35.457	20.7292
149443	149443	CHEMBL257197	C[C@@H](Oc1cccc2ncnc(Nc3ccc4c(cnn4Cc4nccs4)c3)c12)C(=O)N(C)C	0	0	3	0	34.5264	20.6064	22.3325
149565	149565	CHEMBL4129688	COc1ccc(C(=O)NC(=S)Nc2ccc(S(=O)(=O)Nc3ncccn3)cc2)cc1	0	0	0	0	25.2377	19.7239	18.8362
149752	149752	CHEMBL227260	CC(=O)Nc1nc2c(Oc3cc(N4CCN(C(C)c5ccccc5)CC4)ncn3)cccc2s1	0	0	0	0	37.4014	11.2539	20.3462
150196	150196	CHEMBL1551858	C#CCOc1ccc(C2CC(=O)Nc3c2c(C)nn3-c2nc(C)cc(C)n2)cc1	0	0	0	0	53.3339	36.6876	31.1623
150263	150263	CHEMBL2001760	COc1cc(/C=C/C(=N\NC(N)=S)c2sc(NNC(C)=O)nc2C)ccc1O	0	0	0	0	34.0478	20.2619	23.0869
150533	150533	CHEMBL1349543	COC(=O)CSc1nc(COc2ccccc2)nc2ccccc12	0	0	0	0	33.2262	25.5496	28.0155
150552	150552	CHEMBL2283291	COc1ccc(/C=c2\sc3n(c2=O)C(c2ccc(Cl)cc2)C(C(=O)Nc2ccccc2)=C(C)N=3)cc1	0	0	0	0	36.1701	33.3259	21.9255
150965	150965	CHEMBL212421	COc1cccc(-c2nc(SC)nc3sc(C(=O)NN)c(N)c23)c1	0	0	0	0	36.4741	21.8172	22.086
150985	150985	CHEMBL1540177	Cl.N=c1sccn1CC(=O)Nc1cc(Cl)ccc1Oc1ccccc1	0	0	0	0	35.4152	32.9426	21.8725
151249	151249	CHEMBL247107	CCCCCCCCCCCCCCc1sc2nc(SC)n(-c3ccc(OC)cc3)c(=O)c2c1C	0	0	0	0	33.0545	26.0631	28.7826
151253	151253	CHEMBL246060	CCN1CCc2sc3nc(SCC#N)n(-c4ccc(OC)cc4)c(=O)c3c2C1	0	0	0	0	27.5651	21.015	24.861
151417	151417	CHEMBL41972	COc1ccc(CCNC(=O)/C=C/c2c(C)nc(O)nc2O)cc1	0	0	0	0	36.0833	27.6212	24.5948
151524	151524	CHEMBL4094533	COc1ccc(-c2csc(C3=C(C)NC(=O)NC3c3cccc(O)c3)n2)cc1	0	0	0	0	35.9703	33.4885	25.7572
151685	151685	CHEMBL1866963	Cc1nn(-c2ccc3nnc(C)n3n2)c(C)c1CCC(=O)Nc1ccc(OC(F)(F)F)cc1	0	0	0	0	50.4596	35.9102	30.1382
151784	151784	CHEMBL4229147	CCCNC(=O)c1nc(-c2ccc(OC)cc2)c2c(C(F)(F)F)cc(-c3ccccc3)nc2n1	0	0	0	0	37.7627	27.732	25.0871
151823	151823	CHEMBL1364960	Cc1cc(Cl)ccc1OCC(=O)N[C@@H](Cc1ccccc1)c1nc2ccccc2[nH]1	0	0	0	0	44.1334	31.4455	23.4486
152230	152230	CHEMBL260309	COC(=O)C1=C(C)NC(C)=C(C(=O)OC)C1c1c(-c2ccccc2OC)nc2sccn12	0	0	0	0	29.0066	22.0876	20.6254
152452	152452	CHEMBL4204681	COc1ccc(Cn2c(SCC(=O)Nc3nc4ccc(C(F)(F)F)cc4s3)nc3c(c2=O)SCC3)cc1	0	0	3	0	35.2181	28.7321	23.8932
152459	152459	CHEMBL409089	COC(=O)C1=C(C)NC(C)=C(C(=O)OC)C1c1c(-c2cc(OC)c(OC)cc2[N+](=O)[O-])nc2sccn12	0	0	0	0	37.0676	17.8195	23.9284
152477	152477	CHEMBL561049	CC(CN)Oc1cc(Oc2ccc(S(C)(=O)=O)cc2)cc(C(=O)Nc2nccs2)c1	0	0	0	0	24.7588	19.0383	18.0038
152500	152500	CHEMBL1397998	COc1ccc(NC(=O)CSc2nc3nc(C)c(Cc4ccccc4Cl)c(C)n3n2)cc1OC	0	0	0	0	50.4198	39.5619	26.5292
152531	152531	CHEMBL440738	CC(=O)Nc1ccc(Oc2cc(NCc3ccccc3)nc(N)n2)cc1	0	0	0	0	30.6887	20.9081	21.5577
152623	152623	CHEMBL255860	Cc1ccc(-c2nc(NC(=O)COc3cccc(C#N)c3)cc(-c3nccs3)n2)o1	0	0	0	0	34.3798	28.4222	22.4249
152848	152848	CHEMBL271990	CC(=O)Oc1ccc(Cl)c(-c2cc(C)c3nc(Nc4ccc(OCCN5CCCC5)cc4)nnc3c2)c1	0	0	3	0	32.7345	14.3197	16.2554
152850	152850	CHEMBL1258723	CCCCOc1ccc(-c2nn3c(C)cc(C)nc3c2CC(=O)N(CC)CC)cc1	0	0	0	0	52.2641	35.422	38.7828
152854	152854	CHEMBL1529039	Cc1cc(C(=O)COc2ncnc3sccc23)c(C)n1C	0	0	0	0	32.1196	25.7124	28.7852
152911	152911	CHEMBL1813634	Cc1ccc(-c2csc3ncnc(Oc4ccc(NC(=O)c5cccn(-c6ccc(F)cc6)c5=O)cc4F)c23)s1	0	0	3	0	34.5455	28.085	22.9954
153007	153007	CHEMBL1536024	COc1ccc(OC)c(-c2csc(NC(=O)Cc3ccccc3OC)n2)c1	0	0	0	0	34.5521	32.3927	24.7958
153121	153121	CHEMBL1601819	COc1ccc(-n2c(SC)nc3sc4c(c3c2=O)CCN(C(C)=O)C4)cc1	0	0	0	0	33.806	26.8003	29.3713
153440	153440	CHEMBL1583340	COc1ccccc1CNC(=O)CCCc1nnc2n(C)c(=O)c3sccc3n12	0	0	0	0	47.6837	39.0942	29.4523
153451	153451	CHEMBL579354	COc1ccc(N2CCN(c3ncnc4sc(C(=O)NCc5cccnc5)c(C)c34)CC2)cc1	0	0	0	0	53.0386	16.7932	24.9532
153580	153580	CHEMBL1085753	CCC(C1CC1)n1nc(C)nc(Nc2cc(C)c(OC)cc2C)c1=O	0	0	0	0	39.9958	17.2612	22.7732
153670	153670	CHEMBL1396966	COc1cc2c(cc1OC)[C@H](C)N(C(=O)CSc1nc(O)c(C(C)C)c(O)n1)CC2	0	0	0	0	53.6961	17.3582	27.832
154040	154040	CHEMBL527181	CCOC(=O)C1=C(C)N=c2sc(=Cc3cc(Cl)ccc3O)c(=O)n2C1c1ccc2c(c1)OCO2	0	0	0	0	36.8066	34.5911	21.5551
154137	154137	CHEMBL1421208	COc1ccc(-n2c(SCC3CNC(=O)O3)nnc2-c2ccc(Cl)cc2)cc1	0	0	0	0	61.6757	42.8376	30.0664
154237	154237	CHEMBL4110875	CCO[C@H]1CN(c2nc(-c3cc(C)ccc3OCc3cc4c(c(OC)c3)CN(C3CCOCC3)CC4)cs2)CC[C@H]1C(=O)O	0	0	0	0	27.4275	8.12536	20.7951
154244	154244	CHEMBL1087704	CCCN1CNc2c(c(=O)[nH]c(=S)n2CCc2cc(OC)cc(OC)c2)C1	0	0	0	0	31.1104	21.9875	21.4108
154247	154247	CHEMBL1479541	Nn1c(SCC(=O)Nc2ccc(OC(F)F)cc2)nnc(Cc2ccccc2)c1=O	0	0	0	0	34.581	20.7896	21.9798
154271	154271	CHEMBL51643	COc1ccc(-c2nc(SCCCCCN(CCCCCSc3nc(-c4ccccc4)c(-c4ccccc4)[nH]3)C(=O)NC(C)C)[nH]c2-c2ccc(OC)cc2)cc1	0	0	0	0	49.9102	16.1414	24.705
154312	154312	CHEMBL1813633	COc1ccc(-c2csc3ncnc(Oc4ccc(NC(=O)c5cccn(-c6ccc(F)cc6)c5=O)cc4F)c23)cc1	0	0	3	0	35.2489	28.757	23.7063
154467	154467	CHEMBL1557902	COc1ccccc1NC(=O)CCc1c(C)nc2c(-c3ccc(F)cc3)c(C)nn2c1C	0	0	0	0	51.2912	35.8993	30.3792
154740	154740	CHEMBL1624180	CCN(CC)CCCN(C(C)=O)c1nc(-c2cc(OC)ccc2OC)cs1	0	0	0	0	27.9249	20.3359	24.4775
154781	154781	CHEMBL1164122	COc1ccc(-c2cc(-c3ccc(Cl)cc3)nc(NC(=O)N/N=C\c3ccccc3[N+](=O)[O-])n2)c(OC)c1	0	0	0	0	34.2452	16.8901	17.1598
154841	154841	CHEMBL1467646	CCOC(=O)c1sc2nc(CC(=O)OC)nc(N3CCN(c4ccc(OC)cc4)CC3)c2c1C	0	0	0	0	54.4948	16.3761	33.0586
154956	154956	CHEMBL1092791	C/C(=N\OC(=O)C1CCCCC1)c1nccs1	0	0	0	0	9.09413	0.905964	18.669
155013	155013	CHEMBL1527820	O=C(CCOc1ccccc1)N(Cc1cccnc1)c1nc2c(Cl)cccc2s1	0	0	0	0	33.5293	29.8468	33.9197
155025	155025	CHEMBL1612952	O=C(CSc1nc2cc([N+](=O)[O-])ccc2n1-c1ccccc1)NCc1ccc2c(c1)OCO2	0	0	0	0	33.2613	16.213	21.6782
155293	155293	CHEMBL526238	COc1ccc(NC(=O)CCNc2cc(C)nc(NCCc3ccccc3)n2)cc1	0	0	0	0	29.9385	20.3416	20.9823
155341	155341	CHEMBL1438114	Cc1ccc(S(=O)(=O)c2cnc(SCC(=O)Nc3ccc4c(c3)OCCO4)[nH]c2=O)cc1Cl	0	0	0	0	27.2622	23.839	17.3918
155473	155473	CHEMBL563989	C[C@@H](Oc1cc(-c2cnc3ccccn23)sc1C(N)=O)c1ccc(CNC(C)(C)C)cc1C1CC1	0	0	3	0	37.3228	11.4113	19.5963
155477	155477	CHEMBL558074	NC(=O)c1sc(-c2cnc(NC(=O)c3ccccc3)s2)cc1OCc1ccccc1C(F)(F)F	0	0	3	0	35.5729	32.9388	24.6726
155943	155943	CHEMBL4087994	CC1=C(c2nc(-c3ccc(C#N)cc3)cs2)C(c2ccc(OC(F)(F)F)cc2)NC(=O)N1	0	0	0	0	35.3915	33.0297	25.4669
156062	156062	CHEMBL559737	COc1ccc(/C=N/c2nc3[nH]nc(C)n3c(=O)c2S(=O)(=O)NN2C(=O)CSC2c2ccc(Cl)cc2)cc1	0	0	0	0	16.8792	16.6615	13.2213
156120	156120	CHEMBL1552002	O=C(CCOc1ccccc1)N(Cc1cccnc1)c1nc2ccc(Cl)cc2s1	0	0	0	0	33.5917	29.8658	33.9631
156320	156320	CHEMBL3978472	Cc1cccc(-c2csc(N3CC[C@@]4(C(=O)O)C[C@H]4C3)n2)c1OCc1ccc2c(c1)CCN(C1CCOCC1)CC2	0	0	0	0	25.1509	7.8388	19.568
156749	156749	CHEMBL1360266	COc1ccc(/C=C/C(=O)OCn2c(SC)nnc(C)c2=O)cc1OC	0	0	0	0	51.8614	38.3742	38.6281
156989	156989	CHEMBL2234436	COc1ccc(Nc2nc3c(sc(=S)n3-c3ccc(Cl)c(Cl)c3)c(=O)n2-c2ccc(OC)cc2)cc1	0	0	0	0	29.0509	22.7498	17.4807
157000	157000	CHEMBL1459368	COc1ccc(-c2ccc(-c3noc(C(C)C)n3)c(OC)n2)cc1	0	0	0	0	54.837	26.5431	36.2082
157001	157001	CHEMBL2238560	COc1ccc(-n2c(=S)sc3c(=O)n(-c4ccc(F)cc4)c(Nc4ccc(F)cc4)nc32)cc1	0	0	0	0	28.7539	22.1327	21.2726
157241	157241	CHEMBL212279	COc1ccc(-n2nc(C#N)c3[nH]c(=O)n(-c4ccc(-c5ccccc5S(C)(=O)=O)cc4F)c(=O)c32)cc1	1	0	0	0	25.9259	24.3931	19.9363
157310	157310	CHEMBL247145	CCc1sc2nc(SCC#N)n(-c3ccc(OC)cc3)c(=O)c2c1C	0	0	0	0	33.1323	26.1012	28.7263
157386	157386	CHEMBL247108	COc1ccc(-n2c(SC)nc3sc4c(c3c2=O)CCCCC4)cc1	0	0	0	0	33.0374	26.0036	28.7733
157851	157851	CHEMBL203324	Cn1c(=O)[nH]c(=O)c2c1nc(S)n2CC(O)COc1ccc2ccccc2c1	0	0	0	0	34.6894	29.2407	24.5654
158220	158220	CHEMBL429290	C#CCSc1nc2sc3c(c2c(=O)n1-c1ccc(OC)cc1)CCCCC3	0	0	0	0	33.1822	26.0661	28.8592
158356	158356	CHEMBL1704364	COc1ccc(CN2C(=O)C(C)Nc3ncnc(N4CCOCC4)c32)cc1	0	0	0	0	39.7985	14.0954	21.7817
158358	158358	CHEMBL1928595	COc1cc(C2c3c(nc(N)c(C#N)c3N)Oc3[nH]c(=S)[nH]c(=O)c32)cc(OC)c1OC	0	0	0	0	31.6731	22.3705	23.6218
158441	158441	CHEMBL215334	COc1cc(-n2cnc3cc(-c4cccc(I)c4)sc3c2=O)ccc1OCCN1CCCC1	0	0	0	4	38.8683	11.4028	23.8466
158523	158523	CHEMBL1193431	COc1cc(Nc2ncnc3c(C)cc(C)cc23)cc(OC)c1OC	0	0	0	0	33.8741	21.716	36.0088
159117	159117	CHEMBL3115295	COc1ccc(-n2c(=O)[nH]c3cc(C(=O)NCc4ccc5c(c4)OCO5)sc3c2=O)nc1OC	0	0	0	0	35.2835	28.4332	26.668
159184	159184	CHEMBL3039911	COc1cc2ncnc(Nc3ccc(O)cc3)c2c(OC)c1OC	0	0	0	0	32.8246	21.0599	35.2762
159354	159354	CHEMBL1513728	COc1ccc(NC(=O)CSc2nc(-c3cccc(C)c3)[nH]c2-c2ccccc2)cc1OC	0	0	0	0	34.1223	28.9578	25.8851
159528	159528	CHEMBL606370	CCS(=O)(=O)c1ccc(Oc2cc3nc(-c4ccccn4)[nH]c3cc2CCC(=O)N(C)C)cc1	0	0	0	0	27.7067	24.6727	21.1076
159654	159654	CHEMBL596972	COc1cc(-c2nc(=O)c3c([nH]2)sc2cc(C)ccc23)ccc1OCC(=O)O	0	0	3	0	34.4619	28.5852	17.7153
159912	159912	CHEMBL1830256	Cc1cc(=O)oc2cc(OC(=O)CNc3nccs3)ccc12	0	0	0	0	28.7925	21.3962	19.5574
159916	159916	CHEMBL1552542	COc1ccc(-c2nc3cnc(N4CCNCC4)nc3n(Cc3cccs3)c2=O)cc1	0	0	0	0	39.2689	12.0952	20.5452
160002	160002	CHEMBL2440597	O=C(Nc1nc(C(F)(F)F)cs1)c1cc(F)cc(Oc2cncnc2)c1	0	0	0	0	33.1652	27.6799	22.4819
160039	160039	CHEMBL1534218	COc1cc(CNc2ccc3[nH]c(=O)[nH]c3c2)cc(Br)c1OCc1ccccc1F	0	0	0	0	33.7298	21.4679	23.4466
160344	160344	CHEMBL457461	CCOc1ccc(NC(=O)CSc2nnc(-c3cc(F)c(Cl)cc3Cl)n2N)cc1	0	0	0	0	34.6373	21.0981	18.3652
160524	160524	CHEMBL3196667	CCOC(=O)C1=C(c2ccccc2)N=c2s/c(=C\c3cc(OC)c(OC)c(OC)c3)c(=O)n2C1c1cccs1	0	0	0	0	35.7381	33.0956	30.4897
160581	160581	CHEMBL1976536	COC(=O)c1ccc2c(c1)sc1nc(-c3ccc(OC)cc3)cn12	0	0	0	0	32.8646	28.9256	30.1549
161017	161017	CHEMBL1590802	CCOc1ccc(-c2cn3c(n2)sc2cc(C(=O)NCCc4ccc(OC)c(OC)c4)ccc23)cc1	0	0	0	0	35.4943	30.7791	27.0819
161341	161341	CHEMBL1322326	O=C(CSc1nccn1-c1ccc(Cl)cc1)NCc1ccc2c(c1)OCO2	0	0	0	0	34.6427	30.0037	20.5735
161539	161539	CHEMBL1447179	COc1ccc(CN(CC(=O)NC2CCCCC2)C(=O)CCC(=O)Nc2nccs2)cc1	0	0	0	0	53.739	16.4259	25.7527
161784	161784	CHEMBL134715	COc1cc2nc(N3CCN(C(=O)/C=C/c4ccsc4)CC3)nc(N)c2cc1OC	0	0	0	0	40.4338	12.2595	22.6053
162192	162192	CHEMBL3144022	NC(=O)c1csc([C@@H]2O[C@H](COP(=O)(O)O)[C@@H](O)[C@H]2O)n1	0	0	0	0	8.39833	1.99316	2.57402
162286	162286	CHEMBL17097	COc1cccc(Sc2c(C)c(=O)[nH]c(=O)n2COCCO)c1	0	0	0	0	34.984	27.007	24.1434
162316	162316	CHEMBL409149	COC(=O)C1=C(C)NC(C)=C(C(=O)OC)C1c1c(-c2cc(OC)c([N+](=O)[O-])cc2OC)nc2sc(Cl)cn12	0	0	0	0	36.4371	18.1021	18.1536
162317	162317	CHEMBL1180397	CCCCCCCCCCCCCCCCCC1OCC(COCCCCCC[n+]2cscc2C)O1	0	0	0	0	9.06862	0.623843	20.4594
162363	162363	CHEMBL16280	COc1ccc(-c2csc(NC(=O)C(=O)O)n2)cc1OC	0	0	0	0	34.6897	33.0158	18.6513
163041	163041	CHEMBL1310805	CCOC(=O)CSc1nc(O)c2sc(=S)n(-c3ccc(OCC)cc3)c2n1	0	0	0	0	33.2868	26.4727	24.4023
163428	163428	CHEMBL225354	COc1cc(C(=O)Nc2nccs2)cc(OC)c1OC	0	0	0	0	32.9106	31.3952	27.1114
163482	163482	CHEMBL226574	CC(=O)Nc1nc2c(Oc3cc(N4CCN([C@H](C)c5ccc(F)cc5)CC4)ncn3)cccc2s1	0	0	0	0	37.4174	11.2607	20.3287
163589	163589	CHEMBL3775581	Cc1nc2c(c(N(C)c3ccc(OCC(=O)NO)cc3)n1)CCC2	0	0	0	0	37.2719	28.2617	25.6178
163744	163744	CHEMBL1430332	CN(C)CCN(C(=O)COc1ccc(Cl)cc1)c1nc2cc3c(cc2s1)OCO3	0	0	0	0	27.2295	19.5652	27.002
164959	164959	CHEMBL424095	COc1ccc(C2=NOC(C(=O)Nc3nccs3)C2)cc1	0	0	0	0	34.4076	32.4659	25.4774
165016	165016	CHEMBL1477164	COc1ccccc1C(=O)Nc1ccc(Oc2ncnc3sc(-c4ccccc4)cc23)cc1	0	0	0	0	34.3528	27.8122	23.1728
165196	165196	CHEMBL488708	COc1cc(NC(=O)N2CCN(c3nc(-c4ccccc4)ns3)CC2)ncn1	0	0	0	0	54.7353	17.5539	26.4227
165960	165960	CHEMBL482488	O=C(COc1ccccc1)N1CCN(c2nccc(Nc3ccc4ncsc4c3)n2)CC1	0	0	0	0	38.5726	11.602	21.303
166473	166473	CHEMBL1377395	COc1ccc(CCNC(=O)c2sc3nc4n(c(=O)c3c2C)CCC4)cc1	0	0	0	0	34.308	27.7957	23.1811
166650	166650	CHEMBL598832	CCc1oc2cc(S(=O)(=O)Nc3nccs3)ccc2c1C(=O)c1cc(Br)c(O)c(Br)c1	0	0	0	0	28.9222	28.2935	21.2988
166750	166750	CHEMBL3474956	CCc1nc(CN2CC[C@@](O)(CCOC)[C@H](C)C2)cs1	0	0	0	0	10.0409	2.15596	4.17562
167018	167018	CHEMBL1374723	O=C(Nc1nccs1)c1ccc2c(c1)OCO2	0	0	0	0	33.1264	31.4621	26.8627
167145	167145	CHEMBL580743	NC(=O)c1sc(-n2cnc3ccc(C(=O)NCCN4CCOCC4)cc32)cc1OCc1ccccc1C(F)(F)F	0	0	0	0	35.7429	10.8311	18.6245
167372	167372	CHEMBL125946	O=c1cnn(-c2cc(Cl)c(Oc3ccc(O)c(S(=O)(=O)N4C5CCC4CC4(CCCO4)C5)c3)c(Cl)c2)c(=O)[nH]1	0	2	0	0	16.0753	15.7951	12.8409
167425	167425	CHEMBL3970487	CN(C)CC#Cc1nc(-c2cc(Cl)ccc2OC(F)F)c(NC(=O)c2cnn3cccnc23)s1	0	0	3	0	34.8011	21.1926	18.4873
167635	167635	CHEMBL597400	C#CCOc1ccc2c(c1)c(-c1ccc(C(C)C)cc1)nc(=O)n2Cc1ccc(CC)cc1	0	0	0	0	55.2328	19.4464	33.4635
167730	167730	CHEMBL3190136	COc1ccc(Cc2nc3ccccc3n2CC(=O)N/N=C/c2ccc(O)cc2)cc1OC	0	0	0	0	48.3955	34.5507	30.8822
168090	168090	CHEMBL599879	COc1ccccc1Nc1nc(-c2ccc(Cl)cc2)c(CC(=O)O)s1	0	0	0	4	29.5843	22.6253	16.3425
168346	168346	CHEMBL1980190	COc1cc2c(NCCCCCCO[N+](=O)[O-])ncnc2c(OC)c1OC.O=C(O)/C=C/C(=O)O	0	0	0	0	34.784	17.0873	15.2526
168495	168495	CHEMBL4117101	COc1ccc(-c2csc(Nc3ccc(-c4noc(C[C@@H]5CCCN5C(=N)N)n4)cc3)n2)cc1Cl	0	0	0	0	34.7677	10.5862	15.9256
168510	168510	CHEMBL1513082	COc1cc(NC(=O)CSc2nc3nc(C)c(Cc4ccccc4)c(C)n3n2)cc(OC)c1OC	0	0	0	0	50.205	38.5812	32.6197
169060	169060	CHEMBL16561	CCOc1ccc(-c2csc(NC(=O)C(=O)O)n2)cc1.NCCO	0	0	0	0	29.4378	22.3853	15.1686
169236	169236	CHEMBL38347	COc1cc2c(cc1OC)-c1cc(Nc3c(C)cc(C)cc3C)nc(=O)n1CC2	0	0	0	0	33.0483	22.2475	23.6676
169242	169242	CHEMBL525316	COc1cc2nc(N3CCC(CNC(=O)c4cc5ccccc5s4)CC3)nc(N)c2cc1OC	0	0	0	0	38.1921	11.4592	22.1275
169755	169755	CHEMBL1985860	COC(=O)c1ccccc1Nc1nc(-c2cccs2)nc2cc(OC)c(OC)cc12	0	0	0	0	28.9514	22.3636	23.1773
169812	169812	CHEMBL2107323	CNCCCOc1cc(F)c(-c2c(Cl)nc3ncnn3c2N[C@@H](C)C(F)(F)F)c(F)c1.O.O.O=C(O)CCC(=O)O	0	0	0	0	34.1867	21.5713	17.0805
170015	170015	CHEMBL4087795	CCCCc1ccc(NC(=O)Nc2ccc(-n3nc(-c4ccc(OCCN5CCOCC5)cc4)c4c(N)ncnc43)cc2)cc1	0	0	0	0	31.1731	13.221	19.6191
170123	170123	CHEMBL200950	COc1ccc2ccccc2c1N1CCN(CCn2cnc3sc4c(c3c2=O)CCN(C)C4)CC1	0	0	0	0	38.1483	11.0691	24.8056
170351	170351	CHEMBL1872647	Cc1ccc(C)c(NC(=O)CN(C)C(=O)COc2ncnc3sccc23)c1	0	0	0	0	34.4387	27.8234	24.6213
170467	170467	CHEMBL4300433	CCCCc1nc(Cl)c(COc2ccc(/C=C3\SC(=O)NC3=O)cc2)n1Cc1ccc(-c2ccccc2-c2nn[nH]n2)cc1	0	0	0	0	49.5172	16.2128	20.9185
170566	170566	CHEMBL1526157	COc1ccc(-n2c(SCC(=O)Nc3nccs3)nc3sc4c(c3c2=O)CCN(C)C4)cc1	0	2	0	0	27.6694	21.0349	19.6102
171148	171148	CHEMBL3303427	CC(=O)/N=c1\sccn1CC(O)c1ccc(C)cc1	0	0	0	0	35.5581	34.801	14.3512
171356	171356	CHEMBL323515	COc1cc2c(Nc3ccc(Sc4nccn4C)c(Cl)c3)c(C#N)cnc2cc1OCCCN1CCCC1	0	0	3	0	34.2871	8.69222	34.0375
171479	171479	CHEMBL1730669	COc1ccc(C(=O)OCc2cc(=O)n3ccsc3n2)cc1F	0	0	0	0	33.3908	27.1453	29.398
171663	171663	CHEMBL4298171	COc1cc(F)c(-n2c(=O)[nH]c3csc(C(=O)[O-])c3c2=O)cc1OCc1c(OC)ccc(F)c1F.C[N+](C)(C)CCO	0	0	0	0	29.3349	22.7641	15.5821
171733	171733	CHEMBL1372974	COc1ccc(-n2c(SCC(=O)Nc3nccs3)nc3c(c2=O)SC(C)C3)cc1	0	0	0	0	34.0169	27.777	23.5321
171824	171824	CHEMBL1301576	COc1cc2c(cc1OC)-c1cc(Nc3ccccc3C)nc(=O)n1CC2	0	0	0	0	33.031	22.2357	23.6508
172675	172675	CHEMBL1623302	Cc1cccc2sc(N(CCCN(C)C)C(=O)COc3ccc(Cl)cc3)nc12	0	0	0	0	27.8302	20.113	27.3318
172971	172971	CHEMBL1180406	CCCCCCCCCCCCCCC1COC(COCCCC[n+]2ccsc2)C1	0	0	0	0	8.54431	0.597065	20.9393
173044	173044	CHEMBL599440	O=c1[nH]c2cccc(Oc3cccc(NS(=O)(=O)c4cc(Cl)cc(C(F)(F)F)c4)c3)c2[nH]1	0	0	3	0	22.7889	21.3023	15.9218
173084	173084	CHEMBL1546216	O=C(CSc1nc2ccc(Nc3nc(N4CCOCC4)nc(N4CCOCC4)n3)cc2s1)NCc1ccco1	0	0	0	0	35.295	10.7798	17.58
173153	173153	CHEMBL1519559	COc1ccc(-c2c(C(C)=O)c(C)nc3sc4c(=N)n(N)cnc4c23)cc1	0	0	0	0	36.5024	21.7959	22.2384
173190	173190	CHEMBL588340	Cc1ccc2sc(N(CCCn3ccnc3)C(=O)c3ccco3)nc2c1C	0	0	0	0	34.2307	29.669	32.1454
173652	173652	CHEMBL1621068	O=C(c1ccco1)N(CCCN1CCOCC1)c1nc(-c2ccc(Cl)cc2)cs1	0	0	0	0	40.1298	11.0978	27.777
174144	174144	CHEMBL1515365	CCOc1ccc(-n2c(=O)c3sc4ccccc4c3n(Cc3ccc(F)cc3)c2=O)cc1	0	0	0	0	33.5186	26.9018	29.3734
174146	174146	CHEMBL1429320	Cc1ccc(CSc2nnc3c(n2)OC2(Nc4ccccc4-3)C(=O)Nc3ccc(F)cc32)cc1	1	0	0	0	35.841	21.5098	22.1992
174165	174165	CHEMBL180190	COc1ccccc1COc1ccc(C(=O)N(c2ncc(C(=O)O)s2)C2CCCCC2)cc1	0	0	0	0	52.952	17.0431	19.8259
174688	174688	CHEMBL1388012	COc1ccc2c(c1)Cc1sc(NC(C)=O)nc1-2	1	0	0	0	33.2269	31.1885	24.5849
174880	174880	CHEMBL365001	COc1ccc(Nc2nc(-c3c(C)n(Cc4c(F)cccc4F)c(=O)n(C[C@H](N)c4ccccc4)c3=O)cs2)cc1	0	0	0	0	27.3964	20.3574	19.5809
175071	175071	CHEMBL35126	CCc1cccc(C(C)CC)c1N=c1cc2n(c(=O)n1C)CCc1cc(OC)c(OC)cc1-2	0	0	0	0	36.6382	26.8274	29.2423
175168	175168	CHEMBL1613298	COc1cc(/C=C(/C(=O)c2cccs2)c2nc3ccccc3[nH]2)ccc1O	0	0	0	0	31.6627	27.2947	25.2733
175195	175195	CHEMBL1992258	COc1ccc(-n2nnc3c(C#N)c(C)c(-c4ccccc4)n3c2=O)cc1	0	0	0	0	52.073	34.8521	38.107
175758	175758	CHEMBL288248	COc1ccccc1CC/N=C(\N)Nc1nc(-c2ccc(CNC(C)=O)s2)cs1	0	0	0	0	27.2995	19.7624	20.1101
175994	175994	CHEMBL124837	COc1cc2c(NCCCCCO[N+](=O)[O-])ncnc2c(OC)c1OC	0	0	0	0	34.109	14.9318	32.7297
176397	176397	CHEMBL1907213	COc1ccc(Cl)c2sc(N(CCN(C)C)C(=O)C3=COCCO3)nc12	0	0	0	0	27.8117	20.1326	27.452
176697	176697	CHEMBL88273	CCOC(=O)c1nc(O)c2cc3cc(OCC)c(OC)cc3nc2n1	0	0	0	0	36.3191	26.1986	25.7934
176724	176724	CHEMBL297218	COc1cccc2c1CC[C@H]1CN(CCn3c(=O)[nH]c4c(sc5nc(C)cnc54)c3=O)C[C@@H]21	0	0	0	0	39.5376	12.1422	20.4325
177033	177033	CHEMBL3547420	CCOc1ccc(-c2nc(NC(=O)C(C)(C)N)sc2-c2cc(OC)c(OC)c(OC)c2)cc1	0	0	0	0	41.1381	12.0465	22.8878
177341	177341	CHEMBL466412	CN(C)C(=O)O[C@@H]1CN[C@@H](C#Cc2cc3ncnc(Nc4ccc(OCc5cccc(F)c5)c(Cl)c4)c3s2)C1	0	0	3	0	36.309	11.3767	16.4348
177948	177948	CHEMBL1720046	CCCc1cc(O)nc(SCC(=O)N2CCc3cc(OC)c(OC)cc3C2)n1	0	0	0	0	34.5424	26.8279	25.5343
178078	178078	CHEMBL3594408	Cc1ccc(OCc2nnc(SCC(=O)Nc3nc4ccc(S(N)(=O)=O)cc4s3)n2N)cc1Cl	0	0	0	0	24.6236	18.5457	15.5683
178141	178141	CHEMBL1375077	COc1ccc(-c2cn3cccnc3n2)cc1NC(=O)c1cccs1	0	0	0	0	33.4085	28.1186	22.7489
178237	178237	CHEMBL1563120	CCN(CC(=O)Nc1ccc2c(c1)OC(F)(F)O2)Cc1nc(O)c2ccccc2n1	0	0	0	0	30.6408	20.6237	22.3271
178245	178245	CHEMBL1241274	Cc1ccc(O)c(C(=O)Nc2ncc(Cl)s2)c1	0	0	0	0	34.3785	33.4999	17.149
178517	178517	CHEMBL1197967	Cc1cccc(Nc2ncnc3cc4c(cc23)OCO4)c1	0	0	0	0	33.7439	21.6399	34.996
179050	179050	CHEMBL1884072	COc1cccc(CNc2nc3cc(-c4ccc(OC)cc4C)sc3c(=O)n2C)c1	0	0	0	0	27.9094	21.3484	19.958
179671	179671	CHEMBL4096380	COC(=O)C1=C(CN2CCOC[C@H]2C(=O)O)NC(c2nccs2)=N[C@H]1c1cccc(F)c1Cl	0	0	0	0	41.5505	13.4314	12.7498
179698	179698	CHEMBL546757	Cc1cc(N[C@@H](Cc2ccccc2)C(=O)NCCOc2ccccc2)nc(NCCc2cccs2)n1	0	0	0	0	27.1189	20.3639	20.1978
179718	179718	CHEMBL1962746	COc1ccc(-c2ncn(C)c2-c2cc(Cl)c(OC)c(OC)c2)cc1F	0	0	0	0	44.1513	29.0329	38.1349
179838	179838	CHEMBL1545510	CCOC(=O)Cc1cnc(NC(=O)Cn2nnc(-c3ccc(OCC)cc3)n2)s1	0	0	0	0	46.226	38.4995	29.8393
180000	180000	CHEMBL586713	COc1cc2nc(N3CCN(C(=O)c4c(Cl)nsc4-c4ccccc4Cl)CC3)nc(N)c2cc1OC	0	0	0	0	39.2953	12.5914	17.4187
180108	180108	CHEMBL1459356	COc1ccc(-c2noc(CSc3nc(N)c(-c4ccccc4)c(O)n3)n2)cc1OC	0	0	0	0	33.9231	20.2507	23.1384
180306	180306	CHEMBL1975390	COc1cc(S(=O)(=O)Nc2ccc(-c3csc(N4C(=O)CSC4c4cccs4)n3)cc2)ccc1Cl	0	0	0	0	16.8069	16.8207	13.205
180376	180376	CHEMBL1544252	CCc1ccc(-c2csc(NC(=O)Oc3ccccc3)n2)cc1	0	0	0	0	32.9786	31.3993	24.7806
180410	180410	CHEMBL1318174	CCCN1CCN(c2ncnc3sc(C(=O)Nc4ccc(OC(F)(F)F)cc4)c(C)c23)CC1	0	0	0	0	39.7477	12.2443	20.3606
180564	180564	CHEMBL3753853	CCCCC(C)(C)[C@H](O)/C=C/[C@H]1COC(=O)N1CCSc1nc(C(=O)O)cs1	0	0	0	0	6.21007	1.75248	0.946725
180583	180583	CHEMBL1622330	COc1ccc(OC)c(-n2c(=S)[nH]c3c(sc(=S)n3-c3ccccc3C)c2=O)c1	0	0	0	0	33.1164	26.8718	23.4553
180649	180649	CHEMBL4301077	CCN(CC)c1ccc2c(-c3ccc(S(=O)(=O)NCCCCCCNC(=O)NCCCC[C@H](NC(=O)Cc4csc(=N)n4C)C(=O)N[C@@H](Cc4cn(Cc5ccccc5)c[n+]4C)C(=O)NC4CCN(C)CC4)cc3S(=O)(=O)[O-])c3ccc(=[N+](CC)CC)cc-3oc2c1	0	0	0	0	14.0375	10.5437	8.97156
180893	180893	CHEMBL1353100	COc1ccc(C)cc1-n1c(SCC(=O)NCC2CCCO2)nc2c3ccccc3nc-2c1O	0	0	0	0	53.1813	17.4117	26.1229
180902	180902	CHEMBL588593	COc1cc2c(cc1OC)-c1cc(=Nc3c(C)cc(C)cc3C)n(C)c(=O)n1CC2	0	0	0	0	36.6609	26.8272	29.236
181806	181806	CHEMBL1483164	COCCNC(=O)Cn1c(=O)n(CCCCCC(=O)NCc2ccc3c(c2)OCO3)c(=O)c2sccc21	0	0	0	0	37.4812	30.466	27.336
182303	182303	CHEMBL1184248	CC(=O)N1C[C@H](O)C[C@H]1C(=O)NC(CCCN=C(N)N)C(=O)c1nccs1	0	0	0	0	9.01149	3.2822	3.69066
182369	182369	CHEMBL181463	CCOC(=O)c1sc(Nc2nc(N3CCNCC3)c3c(n2)N(Cc2cc(OC)c(OC)c(OC)c2)CCO3)nc1C	0	0	0	0	38.5123	11.4406	22.0162
182659	182659	CHEMBL1513607	Cc1cn2c(=O)c(S(=O)(=O)Nc3ccc(OC(F)(F)F)cc3)c(C)nc2s1	0	0	0	0	28.0326	24.5604	21.1134
182699	182699	CHEMBL4070544	COC(=O)C1=C(CN2CCOC[C@H]2C(=O)O)NC(c2nccs2)=N[C@H]1c1ccc(F)c(F)c1C	0	0	0	0	41.5225	13.4213	12.7338
182796	182796	CHEMBL4297217	CCNC(=O)C[C@@H]1N=C(c2ccc(Cl)cc2)c2cc(OC)ccc2-n2c(C)nnc21.O=S(=O)(O)c1ccccc1	0	0	0	0	22.1117	21.7801	15.283
182852	182852	CHEMBL2106722	COc1ccc(Cl)cc1NC(=O)Cc1ccc(S(=O)(=O)[N-]c2ncc(CC(C)C)cn2)cc1.[Na+]	0	0	0	0	16.6084	14.9865	12.7501
183070	183070	CHEMBL1377216	COc1ccc(N2CCN(C(=O)c3sc4ncn(CC(=O)N5CCCCC5C)c(=O)c4c3C)CC2)cc1	0	0	0	0	52.2175	15.7045	31.8191
183304	183304	CHEMBL331407	COc1cc2c(NCc3ccc4c(c3)OCCO4)ncnc2c(OC)c1OC	0	0	0	0	32.5766	20.8792	34.7755
183511	183511	CHEMBL2107078	COc1ccc(NC(=O)N2CCc3c(sc4c3C(c3ccccc3Cl)=NCc3nnc(C)n3-4)C2)cc1	0	0	0	0	47.9515	39.3574	26.0371
183584	183584	CHEMBL2336766	COc1cc2nc(Nc3ccc(S(C)(=O)=O)cc3F)nc(OCC3CCN(C(=O)OC(C)(C)C)CC3)c2cc1OC	0	0	0	4	15.3524	12.3599	15.6956
183596	183596	CHEMBL3989848	COc1cc2c(N)nc(N3CCN(C(=O)OCC(C)(C)O)CC3)nc2c(OC)c1OC.Cl.O	0	0	0	0	36.1602	12.5965	21.6213
183671	183671	CHEMBL1373145	CCOc1ccc2nc(NC(=O)CSc3nc(O)c(C#N)c(-c4ccccc4)n3)sc2c1	0	0	0	0	35.0765	28.5471	24.7825
184155	184155	CHEMBL3301727	CCC(=O)Nc1ccc(Nc2ncnc3cc(OC)c(OC)cc23)cc1C	0	0	0	0	32.756	21.9498	23.4444
184396	184396	CHEMBL3741832	COc1cccc(COc2ccc([C@@H](NC(=O)[C@H](CCCCN)NC(=O)[C@H](CCCNC(=N)N)NC(=O)c3nccs3)C(N)=O)cc2)c1	0	0	0	0	24.8952	17.2833	18.4506
184489	184489	CHEMBL111292	O=C(NCCCOc1ccc2[nH]c3nc(O)nc-3cc2c1)N1CCN(Cc2ccsc2)CC1	0	0	0	0	34.3101	10.2551	19.4597
184627	184627	CHEMBL196498	CSc1nc(/C=C(\C)[C@@H]2C[C@@H]3C[C@@]3(C)CCC[C@H](C)[C@H](O)[C@@H](C)C(=O)C(C)(C)CCC(=O)O2)cs1	0	0	0	0	6.58586	1.63557	1.7159
184797	184797	CHEMBL1615747	COc1ccc(-c2c(-c3cc(Cl)c(OC)c(OC)c3)ncn2C)cc1N	0	0	0	0	33.9953	20.0312	41.1329
184817	184817	CHEMBL2079472	CC(C)(C)C(=O)NCCn1ccc2ncnc(Nc3ccc(Oc4cccc5sncc45)c(Cl)c3)c21	0	0	0	0	36.5002	11.6011	16.407
184877	184877	CHEMBL4212186	CCCc1nn(C)c2c(=O)[nH]c(-c3cc(Cc4ccc(C(=O)NO)s4)ccc3OCC)nc12	0	2	0	0	46.4891	38.3979	28.9059
185118	185118	CHEMBL1412945	COc1ccc(-c2cc(C(F)(F)F)nc(SCCC(=O)Nc3cc(C)on3)n2)cc1	0	0	0	0	49.8413	38.8423	30.658
185713	185713	CHEMBL1626411	CN(C)CCCN(C(=O)c1ccco1)c1nc(-c2ccc(Cl)cc2)cs1	0	0	0	0	28.1323	20.3298	26.8131
185953	185953	CHEMBL3139273	O=C(O)[C@@H]1C[C@H]2C[C@@H](Oc3cc(-c4nccs4)ccc3-c3nnn[nH]3)CC[C@H]2CN1	0	0	0	0	38.2158	12.0345	14.5855
185954	185954	CHEMBL339339	CCOc1cc2ncnc(Nc3cc(-c4csc(C)n4)ccc3Br)c2cc1OCC	0	0	0	0	27.8302	20.32	32.0868
185966	185966	CHEMBL127249	COCCOc1cc2c(Nc3cccc(-c4csc(C)n4)c3)ncnc2cc1OC	0	0	0	0	27.1596	19.6538	31.4388
186416	186416	CHEMBL1206212	O=C(O)COc1ccc(-c2cnc(CNC(=O)Nc3ncc(Sc4ccccn4)s3)[nH]2)cc1	0	0	0	0	38.5978	33.8396	19.8676
186787	186787	CHEMBL4204759	COc1ccc(Cc2nnc3sc(SCC(=O)Nc4ccc(Cl)cc4)nn23)cc1	0	0	0	0	63.1596	43.995	30.7439
187336	187336	CHEMBL1376692	COc1ccc(-c2csc3ncnc(O)c23)cc1OC	0	0	0	0	31.1876	23.7919	36.1809
187500	187500	CHEMBL37765	COc1cc2c(cc1OC)-c1cc(=Nc3c(F)cccc3F)n(CP(C)(C)=O)c(=O)n1CC2	0	0	0	0	36.6882	27.0353	29.4534
187641	187641	CHEMBL209208	Cn1c(=O)c2[nH]c(-c3ccc(S(=O)(=O)NCCOc4ccccn4)cc3)cc2n(C)c1=O	0	0	0	0	24.3079	22.261	18.4586
187714	187714	CHEMBL3824089	COc1cc(-c2nn(CCN3CCC(N(C)C)CC3)c3ncnc(N)c23)ccc1NC(=O)OC(C)(C)C	0	0	3	0	33.844	14.1833	20.5692
188004	188004	CHEMBL1475146	O=c1c(-c2cccs2)nc2cnc(Oc3cccc(Cl)c3)nc2n1C1CC1	0	0	0	0	55.992	16.5725	36.7242
188015	188015	CHEMBL3609424	COc1ccc(-c2csc(/N=C/c3cc(/C=C/C(=O)c4cccs4)cc(C(C)(C)C)c3O)n2)cc1OC	0	0	0	0	52.9396	15.9219	27.6192
188327	188327	CHEMBL1998997	Cc1ccc(/C=C/c2n[nH]c(N/N=C/c3ccc4c(c3)OCO4)nc2=O)cc1	0	0	0	0	51.1282	35.9368	32.1241
188443	188443	CHEMBL4211568	CCc1cnc(N2CCC(c3nc(COc4ccc(/C=C5\CC(=O)NC5=O)cc4)cs3)CC2)nc1	0	0	0	4	50.958	15.7521	25.1615
188845	188845	CHEMBL2007819	c1c(N2CCOCC2)s[s+]c1N1CCOCC1	0	0	0	0	2.66172	0.503575	9.60067
189176	189176	CHEMBL191490	COc1cc2c(cc1C)NC(=O)/C2=C/c1c(C)nc2sc(C)cn12	0	0	0	0	33.3539	29.5662	23.6309
189886	189886	CHEMBL523970	COc1ccc(C(=O)Nc2ccccc2-c2cn3c(CN4CCNCC4)csc3n2)cc1F	0	0	0	0	36.2382	10.8753	19.1938
190312	190312	CHEMBL1479220	Cc1sc(NC(=O)/C=C/c2ccc3c(c2)OCO3)nc1-c1ccccc1	0	2	0	0	34.2465	31.7132	26.6742
190320	190320	CHEMBL1365428	Cc1csc2nc(COc3ccc(NC(=O)C(C)C)cc3)cc(=O)n12	0	0	0	0	54.8509	17.1066	26.1234
190348	190348	CHEMBL1207382	O=C(O)c1csc(Nc2cc(Cl)ccc2OCc2ccccc2)n1	0	0	0	0	29.3982	22.3457	16.3357
190555	190555	CHEMBL1378375	CCN(CC)C(=O)c1sc2nc(-c3ccc(OC)cc3)cn2c1C	0	0	0	0	33.4182	28.7865	30.2265
190628	190628	CHEMBL1706395	CCN(CC)CCn1c2c(c(SCC(=O)Nc3cc(OC)cc(OC)c3)nc1=O)CCC2	0	0	0	0	26.8796	20.807	20.2981
191201	191201	CHEMBL292881	COc1cccc2c1CC[C@H]1CN(CCn3c(=O)[nH]c4sccc4c3=O)C[C@@H]21	0	0	0	0	40.9192	12.6102	20.8029
191641	191641	CHEMBL1386592	COc1cc2c(cc1OC)-c1cc(Nc3cccc(C)c3)nc(=O)n1CC2	0	0	0	0	33.0407	22.219	23.61
191704	191704	CHEMBL1966194	CCCCCCc1cc2cc(-c3cn4c(n3)sc3ccccc34)c(=O)oc2cc1O	0	0	0	0	33.8068	30.12	23.1189
191896	191896	CHEMBL4116296	CC(C)(C)[C@H](N)C(=O)Oc1ccccc1C(=O)Nc1ncc([N+](=O)[O-])s1	0	0	0	0	35.5752	16.5556	20.3141
192005	192005	CHEMBL1307825	COc1ccc(C(=O)Nc2ccc(Oc3ncnc4sc(-c5ccccc5)cc34)cc2)cc1OC	0	0	0	0	34.1213	27.5329	25.9806
192111	192111	CHEMBL3911039	O=C(CSc1nnc(COc2ccc3ccccc3c2)n1Cc1ccccc1)Nc1ccc(Cl)cc1	0	0	0	0	60.6488	42.4518	29.869
192125	192125	CHEMBL381726	COc1ccc(-c2nc(NC(=O)CSCC(=O)O)sc2C)cc1	0	0	0	0	54.3144	17.4886	19.5563
192373	192373	CHEMBL1186006	COc1ccc(-n2nc(S(C)(=O)=O)c3c2C(=O)N(c2ccc(C4(Cn5ccnc5C)CC4)cc2)CC3)cc1	0	0	0	0	15.9832	15.1135	18.4608
192477	192477	CHEMBL1579154	CCn1c(=S)sc2c(=O)n(CC(=O)Nc3cc(OC)ccc3OC)c(C)nc21	0	0	0	0	34.1932	27.8031	24.6157
192517	192517	CHEMBL1386783	COc1ccc(C)cc1NC(=O)C(Sc1nnc(-c2ccncc2)n1-c1ccc(Cl)cc1)c1ccccc1	0	0	0	0	49.6383	39.7221	26.6187
192548	192548	CHEMBL1366000	COc1ccccc1NC(=O)Cn1cnc2sc(C)c(S(=O)(=O)N3CCCCC3)c2c1=O	0	0	0	0	17.532	16.1909	15.4707
192846	192846	CHEMBL4214902	O=c1[nH]c2ccc(-c3c(Cl)cccc3OC(F)(F)F)cc2[nH]1	0	0	0	0	43.1733	29.9225	22.7382
192929	192929	CHEMBL13680	COc1cccc(-c2nc(=O)n(C(C)C)c3cc4c(cc23)OCO4)c1	0	0	0	0	54.8884	19.4127	32.482
192980	192980	CHEMBL4205780	O=c1[nH]c2cc(OC(F)(F)F)ccc2n1C1CCN(Cc2ccccc2Cl)CC1	0	0	0	0	38.9954	14.8761	17.9646
192988	192988	CHEMBL37550	COc1cc2c(cc1OC)-c1cc(Nc3c(Br)cc(Br)cc3Br)nc(=O)n1CC2	0	0	0	0	33.075	22.2286	23.6366
193133	193133	CHEMBL4209504	COc1ccc2c(c1)[nH]c(=O)n2C1CCN(Cc2ccccc2Cl)CC1	0	0	0	0	39.0608	14.8964	17.9537
193151	193151	CHEMBL4207659	COc1cccc(Cl)c1-c1ccc2[nH]c(=O)[nH]c2c1	0	0	0	0	43.2056	29.9501	22.7222
193261	193261	CHEMBL4065460	C=CC(=O)Nc1cccc(Nc2nc(Nc3ccc(NS(=O)(=O)c4ccc(F)cc4)c(OC)c3)ncc2Cl)c1	0	0	3	0	25.5895	19.738	15.8057
193268	193268	CHEMBL2106128	COc1cc2c(cc1OC)-c1cc(NC(C)(C)C)nc(=O)n1CC2	0	0	0	0	41.0632	14.5152	23.5677
193302	193302	CHEMBL1617147	CCOc1ccccc1-n1c(=S)sc2c(=O)n(-c3ccccc3)c(=S)[nH]c21	0	0	0	0	32.9168	26.6298	24.0573
193309	193309	CHEMBL1453213	Cc1noc(C)c1CSc1nnc2scc(-c3ccccc3)n12	0	0	0	0	50.0616	43.5869	11.9833
193496	193496	CHEMBL1617092	COc1cccc2sc(N(CCCN(C)C)C(=O)COc3ccc(Cl)cc3)nc12	0	0	0	0	27.4712	19.7562	27.109
193497	193497	CHEMBL1540867	COc1ccc(/C=C/C(=O)Nc2ccc(S(=O)(=O)Nc3cc(C)nc(C)n3)cc2)cc1OC	0	0	0	0	23.5	20.6968	20.3372
193798	193798	CHEMBL596973	CCc1ccc2c(c1)sc1[nH]c(-c3ccc(OCC(=O)O)c(OC)c3)nc(=O)c12	0	0	3	0	34.4649	28.601	17.7146
193959	193959	CHEMBL1883046	COc1cc(Cl)c(C)cc1NC(=O)CSCc1nc(-c2ccc(OC)c(OC)c2)no1	0	0	0	0	59.743	20.4504	24.2165
194349	194349	CHEMBL556495	COc1ccc(C(=O)Nc2ncc(Cc3cc(Cl)ccc3Cl)s2)cc1OCCO	0	0	0	0	36.5326	33.9441	22.4146
194593	194593	CHEMBL1477803	Cc1ccc(O)c(NC(=O)CCS(=O)(=O)c2nc(-c3ccc4c(c3)OCO4)cc(C(F)(F)F)n2)c1	0	0	0	0	26.2601	22.7628	21.9034
194625	194625	CHEMBL4211825	COc1cc2ncnc(Oc3ccc(NC(=O)Cn4nnc(C(C)C)n4)cc3)c2cc1OC	0	0	0	0	49.4783	21.9035	27.8415
194654	194654	CHEMBL3196224	COc1ccc(/C=N/NC(=O)c2nc(-c3ccccc3)cc(-c3ccccc3)n2)cc1O	0	0	0	0	51.0987	35.952	32.2065
194690	194690	CHEMBL34091	CCN(c1cc2n(c(=O)n1)CCc1cc(OC)c(OC)cc1-2)c1c(C)cc(C)cc1C	0	0	0	0	36.6717	26.8296	29.3272
194758	194758	CHEMBL1386113	COc1cc(C(=O)Nc2ccc(S(=O)(=O)Nc3cc(C)nc(C)n3)cc2)cc(OC)c1OC	0	0	0	0	23.1777	20.2855	20.9281
194955	194955	CHEMBL3455038	COc1cc2c(nn1)CCN(Cc1noc(CC(C)C)n1)C2	0	0	0	0	38.9052	17.2108	27.1969
195664	195664	CHEMBL1784418	OC[C@H]1O[C@@H](c2cc(Cc3ncc(-c4ccco4)s3)c(Cl)cc2OCCn2cncn2)[C@H](O)[C@@H](O)[C@@H]1O	0	0	0	0	51.646	16.389	21.9341
195697	195697	CHEMBL1907176	CCOc1ccc(C(C)=O)cc1Cn1ccsc1=N	0	0	0	0	34.4239	32.9138	24.2478
196088	196088	CHEMBL1400641	COCCNC(=O)C(c1ccc(OC)cc1)N(CCOC)C(=O)CCC(=O)Nc1nccs1	0	0	0	0	36.8057	33.7819	26.2053
196105	196105	CHEMBL1800790	C=CCN1C(=O)N2CC(CC)N=C2c2[nH]c(-c3cc(OCc4ccccc4)nn3C)nc21	0	0	0	0	49.8015	34.5977	30.2988
196110	196110	CHEMBL409862	COc1ccc(O[C@@H]2CCN(c3ncnc4cc(OC)c(OC)cc34)C2)cc1OC	0	0	0	0	50.8108	16.6547	40.0121
196255	196255	CHEMBL3191117	COc1ccc(/C=N/NC(=O)c2nc(-c3ccccc3)cc(-c3ccccc3)n2)cc1	0	0	0	0	51.8152	35.9706	30.5748
196270	196270	CHEMBL1562911	CCCCC(=O)Nc1nc2c(s1)COc1ccccc1-2	0	0	0	0	33.6766	31.6169	25.0053
196282	196282	CHEMBL1523748	Cc1c(C(=O)Nc2nccs2)oc2c(Cl)cccc12	0	0	0	0	33.7987	32.3902	22.2595
196388	196388	CHEMBL1480924	COc1ccc(-c2cn3c(C)c(C(=O)N4CCN(c5ccccc5F)CC4)sc3n2)cc1	0	0	0	0	52.928	15.7006	32.0259
196473	196473	CHEMBL1829057	CC(=O)NC1=C(C#N)C(c2ccc(Cl)cc2)c2sc(Nc3ccc(S(N)(=O)=O)cc3)nc2O1	0	0	0	0	24.6731	19.3035	15.7585
196565	196565	CHEMBL215008	COc1ccc(-n2c(C)nc3cc(-n4cnc5cc(-c6ccc(Cl)cc6)sc5c4=O)ccc32)cc1	0	0	0	4	34.2425	29.4663	34.0264
196697	196697	CHEMBL1424212	CCn1c(=O)n(CC)c2cc(S(=O)(=O)NCCOc3ccccc3)c(C)cc21	0	0	0	0	22.5843	20.9412	19.1481
196895	196895	CHEMBL1557857	CCCCn1c(SCC(=O)c2cc(OC)ccc2OC)nc2cc(S(N)(=O)=O)ccc21	0	0	0	0	27.2697	24.7438	20.4065
197031	197031	CHEMBL1592697	Cc1ccc(Oc2nc3ccccn3c(=O)c2/C=C(\C#N)c2nc3ccccc3s2)c(C)c1	0	0	0	0	32.767	26.6865	28.6117
197525	197525	CHEMBL1967177	COc1ccc(-c2nc(SCC(=O)N/N=C/c3ccc(O)c(OC)c3)[nH]c2-c2ccc(OC)cc2)cc1	0	0	0	0	47.9196	37.5222	31.7323
197535	197535	CHEMBL4300877	CCN(CC)c1ccc2c(-c3ccc(S(=O)(=O)NCCCC[C@H](NC(=O)Cc4csc(=N)n4C)C(=O)N[C@@H](Cc4cn(Cc5ccccc5)c[n+]4C)C(=O)NC4CCN(Cc5ccccc5)CC4)cc3S(=O)(=O)[O-])c3ccc(=[N+](CC)CC)cc-3oc2c1	0	0	0	0	13.9221	10.4116	9.46258
197540	197540	CHEMBL3502791	COCC1CC2(CCN(CC3CC3)CC2)CN1Cc1csc(C)n1.O=C(O)C(F)(F)F.O=C(O)C(F)(F)F	0	0	0	0	13.4965	1.62183	18.0909
197548	197548	CHEMBL1422289	COc1ccc(CCNC(=O)CCCc2nnc3n(C)c(=O)c4sccc4n23)cc1OC	0	0	0	0	46.9035	38.1466	31.843
197557	197557	CHEMBL1950008	O=C(COc1ccc2ccccc2c1)NNCC(=O)Nc1nccs1	0	0	0	0	43.3794	37.8564	29.5913
197680	197680	CHEMBL559107	COc1ccc(C(=O)Nc2ncc(Cc3cccc(C(F)(F)F)c3)s2)cc1OCC(C)(C)O	0	0	0	0	53.3894	16.1483	27.4786
197695	197695	CHEMBL1596554	CCn1c2ccccc2c2cc(NC(=O)CSc3nnc(-c4ccc(OC)cc4)n3N)ccc21	0	2	0	0	33.0965	19.8595	21.561
197776	197776	CHEMBL215022	O=C(Cc1cc(Nc2ncnc3cc(OCCCN4CCC[C@@H]4CO)ccc23)n[nH]1)Nc1cccc(F)c1F	0	0	3	0	30.4204	13.0681	18.8761
198178	198178	CHEMBL1946522	Nc1nc(COC(=O)Cc2ccccc2OC(F)(F)F)cs1	0	0	0	0	29.2606	21.6138	21.0678
198508	198508	CHEMBL1867006	COc1ccc(CCNC(=O)CSc2ccc3nnc(CCNC(=O)c4ccc(C)cc4)n3n2)cc1OC	0	0	0	0	46.3832	36.9638	31.6017
198520	198520	CHEMBL507329	O=C(O[C@H]1CN[C@H](C#Cc2cc3ncnc(Nc4ccc(OCc5cccc(F)c5)c(Cl)c4)c3s2)C1)N1CCOCC1	0	0	3	0	34.9319	10.9579	16.0895
198786	198786	CHEMBL274243	CCCc1cc(Cn2c(CC)nc3c(C)cc(C)nc32)cc(CCC)c1OC(C(=O)NS(=O)(=O)c1ccccc1)c1ccc2c(c1)OCO2	0	0	0	0	23.3342	21.3135	21.0354
198836	198836	CHEMBL459520	CCOC(=O)CSc1nc(Cl)cc(OCc2ccc3ncccc3c2)n1	0	0	0	0	33.7779	25.7101	32.2868
199246	199246	CHEMBL3931858	CN(C/C=C/C(=O)N1CCCC(n2nc(-c3ccc(Oc4ccccc4)cc3)c3c(N)ncnc32)C1)CCO	0	0	3	0	31.9578	13.4678	19.6534
199661	199661	CHEMBL1164605	COc1ccc(-c2cc(-c3ccc(Cl)cc3)nc(NC(=O)N/N=C\c3cccc(Cl)c3)n2)cc1OC	0	0	0	0	52.931	37.6363	26.54
199761	199761	CHEMBL547205	COc1ccccc1CCNc1nc(C)cc(NCCC(=O)NCCOc2ccccc2)n1	0	0	0	0	28.7521	19.4928	20.7311
199818	199818	CHEMBL1986073	O=C(COc1ccccc1-c1ccccc1)N/N=C/c1sc(Nc2ccccc2)nc1Cl	0	0	0	0	34.1201	20.6149	18.1563
199955	199955	CHEMBL580600	CCNC[C@H]1CCCN1CCOc1ccc(-n2cnc3cc(-c4ccc(Cl)cc4)sc3c2=O)cc1OC	0	0	0	0	36.5586	11.425	16.9115
200340	200340	CHEMBL1917255	C[C@]12C[C@H](O)[C@H]3[C@@H](CCC4=CC(=O)CC[C@@]43C)[C@@H]1CC[C@]2(OC(=O)c1ccco1)C(=O)CSc1nc2ncccc2s1	0	2	0	0	52.4308	16.5433	24.1792
200775	200775	CHEMBL3143995	COC(=O)c1csc([C@@H]2O[C@H](CO)[C@@H](O)[C@H]2O)n1	0	0	0	0	7.75136	1.77281	2.45456
200829	200829	CHEMBL1814582	C=CCOC(=O)C1=C(C)NC(C)=C(C(=O)OCC=C)C1c1c(-c2cc(OC)ccc2OC)nc2sccn12	0	0	0	0	28.7188	21.7251	20.4977
201580	201580	CHEMBL1540672	COc1ccc(-c2cn3c(C)c(C(=O)Nc4cccc(NC(C)=O)c4)sc3n2)cc1	0	0	0	0	35.6628	31.1997	24.4178
201679	201679	CHEMBL1208514	CCC(CSC(CCc1ccccc1-c1nnnn1C)c1cccc(OCc2ccc3ccc(Cl)cc3n2)c1)C(=O)O	0	0	0	0	52.021	17.3008	20.4637
201754	201754	CHEMBL524585	COc1ccc(NC(=O)CCNc2cc(C)nc(NCc3cccc(C)c3)n2)cc1	0	0	0	0	30.0667	20.4416	20.9923
201823	201823	CHEMBL1546211	O=C(CSc1nnnn1-c1ccc2c(c1)OCCO2)Nc1nc2c(s1)CCCC2	0	2	0	0	46.3041	38.5347	31.0962
201880	201880	CHEMBL1596864	Cc1ccc(OCCCSc2nc(-c3ccc(C(C)(C)C)cc3)nc3cc(=O)[nH]n23)cc1C	0	0	0	0	56.0524	18.0455	26.4901
202076	202076	CHEMBL230252	COc1cccc(OC)c1/C=N/NC(=O)Cc1csc2nc(-c3ccc(Br)cc3)cn12	0	0	0	0	46.6189	38.7933	29.7822
202178	202178	CHEMBL1613701	COc1ccc(NC(=O)CCCn2c(=O)c3sccc3n(Cc3ccccc3)c2=O)cc1	0	0	0	0	35.1771	28.5677	23.7416
202239	202239	CHEMBL4159668	CCc1nnc(SCC(=O)Nc2ccc(OC)c(OC)c2)c2cc3sc(Cl)cc3n12	0	0	0	0	48.4439	39.9355	26.0578
202349	202349	CHEMBL545837	COc1ccc(NC(=O)Nc2nc(-c3ccc(Cl)c(C)c3)cs2)cc1N1CCN(C)CC1	0	0	0	0	39.2977	12.1789	17.2725
202578	202578	CHEMBL3497546	Cl.O=C(N[C@H]1CN[C@H]2CCCO[C@H]21)c1cscn1	0	0	0	0	9.86425	2.40441	4.02416
202863	202863	CHEMBL1500247	COc1ccc(CC(=O)Nc2nn(C)c3nc4c(C)cccc4cc23)cc1	0	0	0	0	51.8295	35.9682	30.1615
202980	202980	CHEMBL1503093	CN(C)CCCN(C(=O)COc1ccc(Cl)cc1)c1nc2ccc(F)cc2s1.Cl	1	0	0	0	27.8682	20.1927	27.2854
202990	202990	CHEMBL1712223	COc1cccc(CNC(=O)CCCn2nc(C)n3c(cc4sccc43)c2=O)c1	0	0	0	0	47.3329	38.7768	29.1279
203320	203320	CHEMBL1330543	CCOC(=O)N1CCC(NC(=O)c2ccc3c(c2)sc2nc(-c4cccc(OC)c4)cn23)CC1	0	0	0	0	53.0211	16.6249	24.9468
203586	203586	CHEMBL1549888	COc1ccc(NC(=O)CSc2nc3sc4c(c3c(=O)n2-c2ccc(OC)cc2)CCN(C)C4)cc1	0	0	0	0	27.4328	20.8128	19.6332
203630	203630	CHEMBL1500392	COc1cccc(NC(=O)CSc2n[nH]c3c4cc(C)ccc4nc-3n2)c1	0	0	0	0	50.7979	39.0973	31.0752
203989	203989	CHEMBL2260647	COc1ccc2cc3c(/N=C/OC[C@@H](O)[C@H](O)[C@@H](O)C=O)n[nH]c3nc2c1	0	0	0	0	50.3544	36.2955	30.164
203996	203996	CHEMBL4172526	COc1ccc(C2=N/C(=C\c3cc(Br)cc(Br)c3OC(C)=O)C(=O)NN2c2ncc(-c3ccc(Br)cc3)s2)cc1OC	0	0	0	0	44.5453	38.3047	31.0202
204023	204023	CHEMBL1504400	COc1cccc(NC(=O)CSc2ccc3nnc(CCNC(=O)c4ccccc4)n3n2)c1	0	0	0	0	47.5412	38.0874	29.2221
204112	204112	CHEMBL3459633	Cc1nc(CNC(=O)[C@@H]2CCCN2C(=O)OC(C)(C)C)cs1	0	0	0	0	8.778	2.3747	3.33771
204116	204116	CHEMBL251352	CC(=O)Nc1nc2c(Oc3cc(-c4ccc(C(F)(F)F)cc4)nc(NCc4ccccn4)n3)cccc2s1	0	0	0	0	27.1733	20.2111	20.3078
204274	204274	CHEMBL1606360	Cc1ccc(Cc2cnc(NC(=O)c3ccco3)s2)cc1	0	0	0	0	33.8167	32.1571	22.7318
204280	204280	CHEMBL1427455	CCOc1ccc2c(c1)c1nnc(SCC(=O)N3CCC(C)CC3)nc1n2C	0	0	0	0	54.3574	16.8635	32.2593
204376	204376	CHEMBL1580237	CCOC(=O)c1c(-c2ccc(OC)cc2)csc1NC(=O)CSc1ncnc2sccc12	0	0	0	0	34.3888	27.7602	23.2676
204411	204411	CHEMBL1539726	Cc1cc(OC(=O)N(C)C)nc2c1c(C)nn2C	0	0	0	0	53.0803	35.2494	38.6091
205138	205138	CHEMBL220781	COc1ccccc1N1CCN(CCn2c(=O)[nH]c3c(sc4ccccc43)c2=O)CC1	0	0	0	0	40.7983	12.5993	20.7229
205148	205148	CHEMBL3793799	COc1ccc2cc(/C=C3\SC(=S)N(CC(=O)O)C3=O)c3nnnn3c2c1	0	0	0	0	54.5897	18.2227	20.1849
205231	205231	CHEMBL581540	CC(=O)O.Nc1nc(N)c2cc3ccc(OCc4ccccc4)cc3nc2n1	0	0	0	0	31.979	21.7814	22.0426
205256	205256	CHEMBL1323846	Cc1cccc(-c2nc(SCCCOc3ccccc3Cl)n3[nH]c(=O)cc3n2)c1	0	0	0	0	50.8912	40.0886	27.1286
205711	205711	CHEMBL2063687	COc1ccc2c(c1)C(=Cc1c(OC)nc3sccn13)C(=O)N2	0	0	0	0	33.1635	29.5101	23.707
205823	205823	CHEMBL3121334	COc1ncc(-c2ccc3nc(N)n(-c4ccccc4)c(=O)c3c2)cc1NS(=O)(=O)c1ccc(F)cc1F	0	0	0	0	25.3789	19.4864	18.4956
205963	205963	CHEMBL2070979	COc1ccc(-c2csc(NC(=O)[C@H]3CCCCN3S(=O)(=O)c3cn(C)cn3)n2)cc1	0	0	0	0	17.7732	17.0325	16.3577
206132	206132	CHEMBL1335350	CCOc1ncccc1C(=O)Nc1ccc(-c2cn3ccsc3n2)cc1	0	0	0	0	33.8854	29.9304	23.2787
206165	206165	CHEMBL212528	CCCn1c(=O)c2[nH]c(-c3ccc(S(=O)(=O)NCc4ccc(OC)cn4)cc3)cc2n(C)c1=O	0	0	0	0	23.7642	21.9168	18.4036
206243	206243	CHEMBL1964637	COc1cc(/C=C2\N=C(c3ccccc3)N(c3nc4ccc(Sc5ccccc5)cc4[nH]3)C2=O)cc(OC)c1OC	0	0	0	0	34.6838	29.5367	26.348
206442	206442	CHEMBL3358155	O=C1NC(=O)[C@](CNC(=O)c2cc3cc(Cl)ccc3o2)(c2nccs2)N1	1	0	0	0	36.4382	33.9585	23.0911
206450	206450	CHEMBL1389277	O=C(COc1ncnc2sccc12)N1CCc2ccccc2C1	0	0	0	0	33.2082	26.5339	28.3164
206868	206868	CHEMBL40896	COc1cccc2c1CC[C@H]1CN(CCn3c(=O)[nH]c4c(sc5cncnc54)c3=O)C[C@@H]21	0	0	0	0	39.467	12.1568	20.4368
206935	206935	CHEMBL2170493	Nc1ncnc2c1nc(Sc1cc3c(cc1Cl)OCO3)n2CCC1CCN(C=O)CC1	0	0	0	0	38.5637	12.414	17.1772
207078	207078	CHEMBL1302653	CCOC(=O)Cn1nnnc1CN(Cc1ccc(OC)cc1)Cc1cc2cc(C)cc(C)c2nc1O	0	0	0	0	34.7499	21.6154	22.7086
207265	207265	CHEMBL3585362	COc1cc(N2CCc3nc(NC(=O)NCCc4cn(CC(F)F)cn4)sc3C2)cnc1Cl	0	0	3	0	35.6525	31.5005	21.3244
207282	207282	CHEMBL3330828	COc1ccc(-c2csc3c(=O)n(-c4ccc(OC)cc4)cnc23)cc1	0	0	0	0	33.2489	26.8525	29.0895
207438	207438	CHEMBL1316975	COc1ccc(-c2cn3c(n2)sc2cc(C(=O)Nc4ccc(C)cc4C)ccc23)cc1	0	0	0	0	34.6691	30.5668	24.0115
207920	207920	CHEMBL211842	COc1cc(C)c(Sc2cnc(NC(=O)C3CC3)s2)cc1C(=O)N1CCN(C(C)=O)CC1	0	0	3	0	53.2979	16.3802	25.006
208060	208060	CHEMBL4062551	COc1ccc(-c2csc(N/N=C3\CC(=O)c4ccccc43)n2)cc1OC	0	0	0	0	42.8313	37.7407	30.9743
208118	208118	CHEMBL411235	COC(=O)C1=C(C)NC(C)=C(C(=O)OC)C1c1c(-c2cccc(OC)c2)nc2sccn12	0	0	0	0	28.9105	21.9783	20.5847
208229	208229	CHEMBL179603	COc1ccc(NC(=O)Nc2ccc(Oc3ncnc4cc(OC)c(OC)cc34)cc2)cc1	0	0	3	0	37.2639	28.1982	26.5126
208261	208261	CHEMBL1276893	COc1ccc(NC(=O)Nc2cccc(N(C)c3ncnc4cc(OC)c(OC)cc34)c2)cc1	0	0	3	0	38.3359	28.736	26.9714
208279	208279	CHEMBL1438674	CC(=O)NCCNc1nc(-c2ccc3c(c2)OCO3)nc2ccccc12	0	0	0	0	31.2518	21.0335	22.723
208313	208313	CHEMBL4077564	COc1ccc(CC(=O)Nc2cc(-c3ccccc3)nc3ncnn23)cc1	0	0	0	0	52.3181	36.3481	30.4707
208660	208660	CHEMBL1348917	Cc1c(C(=O)Oc2ccc(F)cc2)sc2ncn(Cc3cccc(F)c3)c(=O)c12	0	0	0	0	32.893	26.0013	29.1006
208720	208720	CHEMBL1940641	CC(=O)Oc1ccccc1C(=O)Nc1ncc(Cl)s1	0	0	0	0	33.7669	32.5864	21.5503
208773	208773	CHEMBL1722168	COc1cccc(CNC(=O)Cn2ncn3nc(-c4cccs4)cc3c2=O)c1	0	0	0	0	47.8011	38.9113	29.2103
208784	208784	CHEMBL1241302	Cc1ccc(C(=O)Nc2ncc(Cl)s2)c(O)c1	0	0	0	0	34.4134	33.5185	17.1542
208921	208921	CHEMBL3221551	CCCCOC(=O)Nc1ccc(Nc2ncnc3cc(OC)c(OC)cc23)cc1.Cl	0	0	3	0	32.5853	21.9392	23.4109
209047	209047	CHEMBL1761937	COc1cc2ncnc(Oc3ccc(NC(=O)Nc4ccc(Br)cc4)cc3)c2cc1OC	0	0	3	0	37.024	27.9063	26.3631
209127	209127	CHEMBL1761942	COc1cc2ncnc(Oc3ccc(NC(=O)Nc4ccc5ccccc5c4)cc3)c2cc1OC	0	0	3	0	37.4675	28.4166	26.6289
209131	209131	CHEMBL1540180	Cn1c(=O)c2c(nc(SCC(=O)NCc3ccc4c(c3)OCO4)n2Cc2ccc(F)cc2)n(C)c1=O	0	0	0	0	35.387	29.3677	26.5579
209161	209161	CHEMBL1330616	COc1cc(CC(=O)Nc2nccs2)cc(OC)c1OC	0	0	3	0	33.6114	32.1191	27.0157
209174	209174	CHEMBL1419541	CCCCCC(=O)Nc1nc(C)c(-c2csc(Nc3cc(Cl)ccc3OC)n2)s1	0	0	0	0	28.8237	21.6846	17.2717
209181	209181	CHEMBL1928277	CCN1CCN(S(=O)(=O)c2cnc(OCCOC)c(-c3nc4c5n(nc4c(=O)[nH]3)CCCC5C)c2)CC1	0	0	0	0	16.0156	12.9192	14.2569
209235	209235	CHEMBL1434724	COc1ccc(-c2cn3c(n2)sc2cc(C(=O)NCCCc4ccccc4)ccc23)cc1	0	0	0	0	35.2809	30.9572	24.1178
209425	209425	CHEMBL1489230	Cc1ccc2c(nc3s/c(=C\c4ccc(-c5ccccc5C(=O)O)o4)c(=O)n32)c1C	0	0	0	0	35.2675	31.2161	18.88
209437	209437	CHEMBL440970	COc1cc(-c2nnc(Sc3ncnc4ccc(I)cc34)o2)cc(OC)c1OC	0	0	0	0	49.6466	38.629	36.805
209536	209536	CHEMBL3330811	COc1ccc(-n2cnc3c(-c4ccccc4)csc3c2=O)cc1	0	0	0	0	32.5723	26.3831	28.7679
209727	209727	CHEMBL397644	COc1ccccc1-n1c(SCC#N)nc2sc3c(c2c1=O)CCCC3	0	0	0	0	33.1979	26.2549	29.0403
209901	209901	CHEMBL1378620	O=C(CSc1nnc(Cn2c(=O)sc3ccccc32)n1-c1ccccc1)NCc1ccco1	0	0	0	0	46.9128	38.8935	27.6331
210027	210027	CHEMBL1373612	O=C(Nc1nc(-c2ccccc2)cs1)C1c2ccccc2Oc2ccccc21	0	0	0	0	33.5361	31.5815	24.3962
210117	210117	CHEMBL1548496	Cc1c(C(=O)NCc2ccc3c(c2)OCO3)sc2nc(-c3ccc(F)cc3)cn12	0	0	0	0	34.1158	29.7257	26.4126
210217	210217	CHEMBL3605088	CCS(=O)(=O)c1ccc(CC(=O)Nc2nc(-c3cccc(Cl)c3)c(Oc3ccccc3)s2)cc1	0	2	0	0	29.1442	28.5269	19.3128
210225	210225	CHEMBL3608532	COc1cc2c(cc1Nc1ncc(Cl)c(Nc3ccccc3S(=O)(=O)C(C)C)n1)CN(C(=O)CO)CCC2	0	0	3	0	14.2287	11.6231	11.2214
210243	210243	CHEMBL1374307	COc1cccc(-n2c(=O)c3c4c(sc3n(Cc3ccccc3C#N)c2=O)CCCC4)c1	0	0	0	0	33.7713	26.786	29.3349
210451	210451	CHEMBL1512316	CCC(C)NC(=O)CCSc1nc(-c2ccc(OC)cc2)cc(C(F)(F)F)n1	0	0	0	0	34.2293	26.6068	23.8954
210558	210558	CHEMBL1423477	COc1ccc(-c2cc(C(F)(F)F)nc(SCC(=O)Nc3cc(C)on3)n2)cc1	0	0	0	0	50.2722	39.2434	30.7876
210623	210623	CHEMBL1457009	COc1ccc(CNCC(=O)Nc2cc(C)nn2-c2nc(C)cc(C)n2)cc1OC	0	0	0	0	34.92	21.3675	23.6913
210776	210776	CHEMBL3609404	CCS(=O)(=O)c1ccc(CC(=O)Nc2ccc(-c3ccccc3OC(F)(F)F)c(-c3cncnc3)c2)cc1	0	2	0	0	27.0431	23.3485	20.222
210828	210828	CHEMBL1525037	O=C(Nc1nccs1)c1ccc(COc2c(F)c(F)cc(F)c2F)cc1	0	0	0	0	34.7393	32.9706	24.4263
211833	211833	CHEMBL335464	CC(C)c1csc(COc2ccn3c(=O)c(-c4nnn[nH]4)cnc3c2)n1	0	0	0	0	53.4819	16.7914	25.9394
211853	211853	CHEMBL1801507	O=C(Nc1ncc(Br)s1)c1cccc(Cl)c1O	0	0	0	0	34.2914	33.3173	16.9053
211908	211908	CHEMBL588208	COc1cc(NC(=O)c2ccc3c(=O)n(Cc4ccccc4)c(=S)[nH]c3c2)cc(OC)c1OC	0	0	0	0	35.2349	27.0803	26.4254
211926	211926	CHEMBL1543636	COc1ccc(-c2noc(CSc3nc(N)c(-c4ccccc4)c(O)n3)n2)cc1	0	0	0	0	34.1869	20.4878	21.892
211964	211964	CHEMBL3605085	CCS(=O)(=O)c1ccc(CC(=O)Nc2nc(-c3ccccc3)c(Oc3ccc(C(F)(F)F)cc3)s2)cc1	0	2	0	0	28.7998	27.9576	22.0494
212336	212336	CHEMBL3897943	CN(CC1(C#N)CCCCC1)C1CCN(c2nc(-c3cc(Cl)ccc3OC(F)F)c(NC(=O)c3cnn4cccnc34)s2)CC1	0	0	3	0	37.1329	11.7231	16.774
212363	212363	CHEMBL3921881	CN(C)C1CCN(C(=O)c2ccc(-c3nc(-c4cc(Cl)ccc4OC(F)F)c(NC(=O)c4cnn5cccnc45)s3)cc2)CC1	0	0	3	0	36.4844	11.4756	16.7646
212442	212442	CHEMBL3503301	COCCNC(=O)[C@H]1CN(Cc2csc(C)n2)C[C@H]2OCC[C@H]21.O=C(O)C(F)(F)F.O=C(O)C(F)(F)F	0	0	0	0	11.3108	2.50607	4.5126
212526	212526	CHEMBL2424717	CCOC(=O)n1c(=O)n(C2CCN(C3CCc4cc(OC)c(OC)cc43)CC2)c2ccc(Cl)cc21	0	0	0	0	38.2348	13.322	29.1056
212542	212542	CHEMBL2424716	CCOC(=O)Cn1c(=O)n(C2CCN(C3CCc4cc(OC)c(OC)cc43)CC2)c2ccc(Cl)cc21	0	0	0	0	37.4846	13.0398	28.6396
212773	212773	CHEMBL1517247	COc1ccc(Cl)c2sc(N(Cc3cccnc3)C(C)=O)nc12	0	0	0	0	32.874	29.4745	33.6072
213011	213011	CHEMBL1368992	COc1ccc2c(c1)sc1ncc(C(=O)NCc3cccc(C)c3)c(=O)n12	0	0	0	0	33.6783	27.713	23.4865
213186	213186	CHEMBL1545099	Cc1ccc(CCC(=O)Nc2ncc(Cc3cccc(Cl)c3Cl)s2)o1	0	0	0	0	34.8139	33.0513	22.5891
213481	213481	CHEMBL2207745	CC(=O)N1CC2CN(CCc3ccc(Oc4nc5ncccc5s4)cc3)CC2C1	1	0	0	0	37.9327	11.0039	24.0601
213540	213540	CHEMBL460164	COc1cc2c(Nc3ccc(Sc4nccn4C)c(Cl)c3)c(C#N)cnc2cc1OCCCN(C)CCO	0	0	3	0	24.475	16.3964	33.3607
213560	213560	CHEMBL2018982	COc1ccc(C=NNC(=O)Cn2c(CSc3ccccc3)nc3ccccc32)cc1OC	0	0	0	0	48.8401	38.6183	31.9084
213807	213807	CHEMBL1991920	COc1ccc(/C=N/n2cnc3c(sc(=S)n3-c3ccccc3)c2=O)cc1	0	0	0	0	48.0959	38.8371	38.4622
214129	214129	CHEMBL35100	COc1cc2c(cc1OC)-c1cc(Nc3ccc(C)cc3C)nc(=O)n1CC2	0	0	0	0	33.0319	22.2446	23.6578
214311	214311	CHEMBL3792774	CCOC(=O)CN(C)c1cc(OCc2cc(F)c(Oc3ccc(Cl)c(C(F)(F)F)c3)c(F)c2)nc(=O)n1C	0	0	0	0	36.6295	27.3935	34.118
214513	214513	CHEMBL1504763	COc1ccc(C2CC(c3cccs3)=NN2C(=O)CSc2nc(O)c3cnn(-c4ccccc4)c3n2)cc1	0	0	0	0	48.1011	38.7077	30.5319
214605	214605	CHEMBL112418	CCOC(=O)N1CCC(S(=O)(=O)CCCCOc2ccc3[nH]c4nc(O)nc-4cc3c2)CC1	0	0	0	0	15.3061	14.1579	15.4468
214903	214903	CHEMBL1410272	COc1ccccc1C(=O)OCc1cc(=O)n2ccsc2n1	0	0	0	0	33.1239	26.8479	29.1934
214998	214998	CHEMBL1407866	Cc1ccc(C(C)C)c(OCc2nnc(SCC(=O)Nc3ncc(C)s3)n2C)c1	0	0	0	0	53.7181	16.5539	26.1102
215069	215069	CHEMBL417139	COc1cc2c(cc1OC)-c1cc(N(C(C)=O)c3c(C)cc(C)cc3C)nc(=O)n1CC2	0	0	0	0	36.7348	27.0046	29.2774
215524	215524	CHEMBL1433649	O=C(Nc1ccc(OCc2cc(=O)n3c4c(sc3n2)CCCC4)cc1)c1cccc(F)c1	0	0	0	0	34.8816	28.6934	23.243
215582	215582	CHEMBL3198811	COc1cc(/C=N\Nc2nc(-c3ccc(C)cc3)c(NC(C)=O)s2)ccc1O	0	0	0	0	42.7347	37.0835	29.8544
215644	215644	CHEMBL1466009	Cc1cc(OCc2nnc(SC(C)C(=O)O)n2-c2ccccc2)ccc1Cl	0	0	0	0	64.5151	43.2411	29.0762
215747	215747	CHEMBL3764865	Cc1nc2sc3ccccc3n2c1C(=O)NNC(=O)c1ccc(Oc2ccccc2)cc1	0	0	0	0	46.6359	39.0315	28.7886
216020	216020	CHEMBL1499338	C=CCn1c(CCCOc2ccc(Cl)cc2Cl)nnc1SCC(=O)Nc1nccs1	0	0	0	0	47.0001	39.4747	25.9887
216133	216133	CHEMBL379986	COc1ccc(-n2nc(C(N)=O)c3ncn(-c4ccc(-c5ccccc5S(N)(=O)=O)cc4)c(=O)c32)cc1	1	0	0	0	23.7194	22.3984	18.7487
216196	216196	CHEMBL1315400	Cc1cc(OCC(=O)NCCc2nc3ccccc3[nH]2)cc(C)c1Cl	0	0	0	0	44.3935	31.8525	23.5597
217027	217027	CHEMBL1308371	CCC(C)(C)NC(=O)C(c1ccc(O)cc1)N(CCOC)C(=O)CCC(=O)Nc1nccs1	0	0	0	0	53.1277	17.1379	18.3996
217044	217044	CHEMBL1703674	COc1cc(NC(=O)CSc2nc(O)c3c(n2)CCCC3)cc(OC)c1OC	0	0	0	0	34.3597	26.7551	25.4206
217188	217188	CHEMBL1426561	COc1ccc(C(=O)C2CCCN(Cc3sc(N4CCCC4)nc3Cl)C2)c(OC)c1	0	0	0	0	40.9888	11.3771	28.8693
217371	217371	CHEMBL3102888	CCS(=O)(=O)c1ccc(CC(=O)Nc2nc(-c3ccccc3)c(Oc3ccccc3)s2)cc1	0	2	0	0	29.0254	28.2162	22.1878
217508	217508	CHEMBL1457541	Oc1c(C(c2ccc(Cl)cc2Cl)N2CCN(Cc3ccccc3)CC2)sc2nc(-c3ccco3)nn12	0	0	0	0	39.7029	12.3863	18.3554
217528	217528	CHEMBL13381	CC(C)n1c(=O)nc(-c2cccc(F)c2)c2cc3c(cc21)OCO3	0	0	0	0	55.383	19.5863	32.9411
217619	217619	CHEMBL1603778	COc1cc2nc(S)nc(Nc3ccc(NC(C)=O)cc3)c2cc1OC	0	0	0	0	32.0202	22.0103	23.221
217629	217629	CHEMBL1558429	CN(C)CCCN(C(=O)c1cc(Cl)sc1Cl)c1nc2cc3c(cc2s1)OCO3.Cl	0	0	0	4	27.5322	19.849	27.2285
217670	217670	CHEMBL1431821	COc1ccc(-n2c(Cc3cc(O)nc(O)n3)nnc2SCC(=O)Nc2cc(C(F)(F)F)ccc2Cl)cc1	0	0	0	0	49.6378	39.0503	26.2723
217982	217982	CHEMBL1710372	CCOc1ccc(CCNS(=O)(=O)c2c(C)nc3sc(C)cn3c2=O)cc1OCC	0	0	0	0	27.5784	23.972	22.6263
218009	218009	CHEMBL1601573	COc1ccccc1NC(=O)Cc1noc(CSc2cc(C)c3ccccc3n2)n1	0	0	0	0	48.8567	38.7992	30.7393
218081	218081	CHEMBL1518911	C=CCn1c(COc2cccc3ccc(C)nc23)nnc1SCC(=O)O	0	0	0	0	50.6304	40.1165	24.5561
218217	218217	CHEMBL1553649	COc1ccccc1-c1nc(SCC(=O)NCc2ccccc2)c2c(=O)n(C)c(=O)n(C)c2n1	0	0	0	0	34.8567	27.6588	23.8774
218266	218266	CHEMBL1277254	COc1ccc(NC(=O)Nc2cccc(Oc3ncnc4cc(OC)c(OC)cc34)c2)cc1	0	0	3	0	37.2639	28.1982	26.5126
218292	218292	CHEMBL1531144	COc1ccccc1NC(=O)CSc1nc(-c2cccc(Cl)c2)nc2c1Cc1c(CO)cnc(C)c1O2	0	0	0	0	35.8975	28.7963	20.6307
218397	218397	CHEMBL1550392	COc1ccccc1NC(=O)Cn1c(=O)n2nc(C)nc2c2ccccc21	0	0	0	0	51.5599	35.5027	30.8349
218593	218593	CHEMBL3087250	O=C(CSc1nnc(-c2ccc3c(c2)OCCO3)c(O)n1)Nc1ccc(F)cc1	0	0	0	0	50.3159	38.2084	32.5155
218612	218612	CHEMBL3759346	CCOc1ccc(NC(=O)Nc2nc(-c3ccccc3)c(C)s2)cc1	0	0	0	0	34.2746	31.7381	25.23
218638	218638	CHEMBL1762498	CCCn1c(CCc2ccc(Cl)cc2)nnc1CN1C(=O)COc2ccc(Cl)cc21	0	0	0	0	58.8704	38.7471	46.6158
219083	219083	CHEMBL3216989	COc1ccc(-c2c(-c3cc(Cl)c(OC)c(OC)c3)ncn2C)cc1N.Cl.Cl.Cl	0	0	0	0	33.7955	19.9175	41.0272
219180	219180	CHEMBL3769779	COC(=O)CC1N=C(c2ccc(Cl)cc2C)c2cc(OC)ccc2-n2c(C)nnc21	0	0	0	0	59.0119	38.243	47.1555
219220	219220	CHEMBL1486661	CC(=O)Nc1nc(COc2ccc3ccccc3c2)cs1	1	0	0	0	34.1826	32.318	25.8057
219362	219362	CHEMBL394711	CCCCCSc1nc2sc3c(c2c(=O)n1-c1ccc(OC)cc1)CCCC3	0	0	0	0	33.17	26.1255	28.827
219391	219391	CHEMBL227209	CC(=O)Nc1nc2c(Oc3cc(N4CCN(CC(F)(F)F)CC4)ncn3)cccc2s1	0	0	0	0	38.5495	11.553	21.1954
219603	219603	CHEMBL1449004	CCOc1ccc(-n2c(=S)sc3c(O)nc(SCC(=O)NCc4ccco4)nc32)cc1	0	0	0	0	35.7576	28.9197	22.8602
219627	219627	CHEMBL1370107	CCC(Sc1nc(O)c(C#N)c(-c2cccc(OC)c2)n1)C(=O)Nc1nnc(C(C)C)s1	0	0	0	0	53.6859	17.2127	25.7774
219852	219852	CHEMBL4085382	CCOc1ccc2c(c1)sc1nc(C(=O)NCc3cn(Cc4cccc(Oc5ccccc5)c4)nn3)cn12	0	0	0	0	45.3423	37.7776	29.4525
219867	219867	CHEMBL4102473	COc1cc(Cn2cc(CNC(=O)c3cn4c(n3)sc3cc(OC)ccc34)nn2)cc(OC)c1	0	0	0	0	45.9302	38.26	29.2599
219881	219881	CHEMBL1449854	COc1cccc(-c2nc(SCC(=O)Nc3ccc4c(c3)OCCO4)c(-c3ccccc3)[nH]2)c1	0	0	0	0	35.3079	29.8785	26.4272
219910	219910	CHEMBL1090899	C(=N/Nc1ncnc2sc3c(c12)CCCC3)\c1ccc2c(c1)OCO2	0	0	0	0	46.4883	37.2086	48.9223
220006	220006	CHEMBL4239086	CCOc1cc(Cl)c(C(=O)NC(=O)Nc2nc3c(s2)CCCC3)cc1N1CCOCC1	0	0	0	4	53.9078	17.0726	22.5838
220023	220023	CHEMBL257411	C[C@@H](Oc1cccc2ncnc(Nc3ccc4c(cnn4Cc4nccs4)c3)c12)C(=O)N1CCOCC1	0	0	3	0	36.4877	11.04	20.2615
220277	220277	CHEMBL336048	NCCCC[C@H](NC(=O)[C@@H]1CCCN1C(=O)[C@H](N)CC1CCCCC1)C(=O)c1nccs1	1	0	0	0	10.7533	3.07192	3.78518
220319	220319	CHEMBL2441083	COc1cccc([C@H]2O[C@H](CC(=O)O)c3nnc(C(F)(F)F)n3-c3ccc(Cl)cc32)c1C	0	0	0	0	58.9479	39.6718	26.9705
220332	220332	CHEMBL4281481	Cc1ccc(-c2csc(NC(=O)COc3ccc(F)cc3)n2)cc1	0	0	0	0	33.6852	31.7217	25.4495
220356	220356	CHEMBL4127596	COc1cccc(-c2nc(SCC(=O)Nc3nc(-c4cc(Cl)c(NC(C)=O)c(Cl)c4)cs3)[nH]c(=O)c2C#N)c1	1	0	0	0	37.4151	30.3125	21.6237
220391	220391	CHEMBL4287201	Cc1ccc(OCC(=O)Nc2nc(-c3ccc(Cl)cc3)cs2)cc1	0	0	0	0	34.1088	32.451	21.3677
220394	220394	CHEMBL1608115	COc1ccc(-n2c(=O)c3c4c(sc3n3c(S)nnc23)COC(C(C)C)C4)cc1	0	0	0	0	57.2295	18.2304	26.2622
220448	220448	CHEMBL4072650	Cc1ccc(OCC(=O)N(Cc2cccs2)c2nccs2)cc1	0	0	0	0	33.9778	31.6836	30.6438
220488	220488	CHEMBL1537612	COc1cc2c(cc1OC)CN(Cc1cc(=O)n3c(-c4ccccc4)csc3n1)CC2	0	0	0	0	27.8955	21.0606	23.8859
220549	220549	CHEMBL1394018	CCOC(=O)c1csc(NC(=O)CSc2nnnn2-c2ccc3c(c2)OCCO3)n1	0	0	0	0	45.9552	38.2424	30.9369
220587	220587	CHEMBL3197573	Oc1c(Cl)cc(Cl)cc1/C=N/c1nccs1	0	0	0	0	32.8518	30.0048	46.2757
220634	220634	CHEMBL4128947	COc1cccc(-c2nc(SC(C(N)=O)c3nc(-c4ccccc4)cs3)[nH]c(=O)c2C#N)c1	1	0	0	0	34.3569	27.6405	23.3418
220731	220731	CHEMBL2007011	COc1ccc(/C=N/n2c(C)nc3c(sc(=S)n3-c3ccccc3)c2=O)cc1	0	0	0	0	48.0949	38.8165	38.3725
220825	220825	CHEMBL90164	CCCOc1ccc(S(=O)(=O)N(CC)CCN(C)C)cc1-c1nc2c(=O)n(C)c(=O)n(CC(C)C)c2[nH]1	0	0	0	0	15.9144	12.7615	14.8041
221006	221006	CHEMBL1386928	Cc1cnc(NC(=O)CSc2ncc(-c3ccccc3)n2Cc2ccco2)s1	0	0	0	0	34.5097	30.2283	22.4962
221024	221024	CHEMBL1165269	COc1ccc(/C(C)=N\NC(=O)Nc2nc(-c3ccc(Cl)cc3)cc(-c3ccc([N+](=O)[O-])cc3)n2)cc1	0	0	0	0	34.2529	16.8723	17.1613
221228	221228	CHEMBL313561	CCCCCCn1c(=O)n(C)c(=O)c2[nH]c(-c3cc(S(=O)(=O)N4CCN(C)CC4)ccc3OCC)nc21	0	0	0	0	16.0686	12.9737	14.881
221237	221237	CHEMBL1413039	CN(C)CCCN(C(=O)c1ccc(Cl)s1)c1nc2cc3c(cc2s1)OCO3	0	0	0	0	27.5441	19.8688	27.2475
221325	221325	CHEMBL4168911	COc1cc(Cn2cnc3c(Cl)nc(Cl)nc32)cc(OC)c1OC	0	0	0	0	40.195	27.3999	36.0297
221575	221575	CHEMBL1423407	O=C(Nc1ccccc1)N(Cc1ccc2c(c1)OCO2)Cc1nc(O)c2ccccc2n1	0	0	0	0	36.2617	27.4887	26.1443
221787	221787	CHEMBL1087974	COc1ccc(CCn2c3c(c(=O)[nH]c2=S)CN(Cc2ccccc2)CN3)cc1OC	0	0	0	0	30.9716	21.6417	22.8766
221879	221879	CHEMBL562764	NC(=O)c1sc(-c2cnc3ccccn23)cc1OCc1ccccc1Cl	0	0	3	0	33.1545	29.7101	20.6081
221945	221945	CHEMBL1341979	S=C(NCc1ccco1)N1CCN(c2nc(-c3ccc(Cl)cc3)cs2)CC1	0	0	0	0	41.3701	12.6267	18.9608
222079	222079	CHEMBL1571094	COc1ccc(S(=O)(=O)Nc2cc3c(cc2NCc2ccccc2)n(C)c(=O)n3C)cc1	0	0	0	0	24.9231	19.564	19.0185
222102	222102	CHEMBL562681	CN(C)CCOc1ccc(C(=O)Nc2ncc(Cc3cccc(C(F)(F)F)c3)s2)cc1OCCO	0	0	0	0	27.6416	20.0924	21.7532
222137	222137	CHEMBL1436442	COc1ccc(N(C(=O)c2cccc(C)c2)S(=O)(=O)c2ccc3c(c2)n(C)c(=O)n3C)cc1	0	0	0	0	22.3663	20.6018	23.1476
222224	222224	CHEMBL240551	COc1ccccc1NC(=O)c1cc(Sc2nccn2C)c(F)cc1N	0	0	0	0	27.7867	21.5599	19.8121
222505	222505	CHEMBL588865	CC(C)CN1CCC(COc2ccc3ncn(-c4cc(O[C@H](C)c5ccccc5C(F)(F)F)c(C(N)=O)s4)c3c2)CC1	0	0	0	0	36.5407	11.103	19.2483
222533	222533	CHEMBL189764	COc1ccc(-c2cc(-c3ccc(N(C)C)cc3)nc(NS(=O)(=O)c3ccc(NC(C)=O)cc3)n2)cc1	0	0	0	0	23.4622	20.8918	18.8224
223288	223288	CHEMBL1706364	COc1ccc(NC(=O)CN(C)C(=O)c2ccc(NS(=O)(=O)c3ccc4[nH]c(O)nc4c3)cc2)cc1	0	0	0	0	24.7677	22.901	19.2278
223342	223342	CHEMBL552126	COc1ccc(C(=O)Nc2ncc(Cc3cc(Cl)cc(Cl)c3)s2)cc1OCCO	0	0	0	0	36.3769	33.8014	22.3603
223368	223368	CHEMBL1706332	CCOc1ccc(CCNC(=O)CSc2nc3cc(Cl)c[nH]c-3n2)cc1OCC	0	0	0	0	35.2627	30.1516	20.831
223580	223580	CHEMBL215203	O=C(Cc1cc(Nc2ncnc3cc(OCCCN4CCC[C@@H]4CO)ccc23)n[nH]1)Nc1cccc(F)c1	0	0	3	0	30.4069	13.0568	18.8753
223965	223965	CHEMBL409148	COC(=O)C1=C(C)NC(C)=C(C(=O)OC)C1c1c(-c2ccccc2OC(F)(F)F)nc2sccn12	0	0	0	0	28.9989	22.0783	20.5799
223973	223973	CHEMBL412260	CCCc1cn2c(C3C(C(=O)OC)=C(C)NC(C)=C3C(=O)OC)c(-c3c(OC)ccc(OC)c3[N+](=O)[O-])nc2s1	0	0	0	0	36.7103	17.9133	21.2544
224099	224099	CHEMBL1719333	CN(Cc1ccc2c(c1)OCCO2)C(=O)CSc1ncnc2sccc12	0	0	0	0	33.7598	26.7722	28.1185
224129	224129	CHEMBL180642	COc1cccc(-n2c(SCC(=O)NN)nc3scc(-c4ccccc4)c3c2=O)c1	0	0	0	0	48.154	39.5802	29.7915
224299	224299	CHEMBL179513	Cc1nc(COc2nn3c(-c4ccccc4)nnc3c3c2C2CCC3CC2)no1	0	0	0	0	53.3372	25.4498	35.0617
224544	224544	CHEMBL3503524	O=C(O)C(F)(F)F.O=C(O)C(F)(F)F.c1csc(CN2CCO[C@@H]3[C@@H]2CC[C@H]3OCCN2CCCC2)n1	0	0	0	0	14.5367	1.73851	20.1895
224662	224662	CHEMBL1510827	COc1ccc(CC(=O)NCc2cn3ccsc3n2)cc1	0	0	0	0	33.8831	30.0004	24.4275
224713	224713	CHEMBL1650377	CCC(=O)Nc1cc(-c2ccc(OC)cc2OC)nc(-c2ccc(OC)cc2OC)n1	0	0	0	0	36.4322	26.7107	24.1866
224737	224737	CHEMBL1650399	COc1ccc(-c2cc(NC(=O)C(C)C)nc(-c3ccc(OC)cc3OC)n2)c(OC)c1	0	0	0	0	55.886	20.2582	26.8889
224896	224896	CHEMBL1385130	COc1cccc(-c2csc(N3CCN(CC(=O)NNC(=O)c4ccc(Cl)cc4)CC3)n2)c1	0	0	0	0	38.5635	11.8408	17.2746
225623	225623	CHEMBL1642732	CC(C)(Oc1ccc(-c2csc(NC(=O)CCl)n2)cc1)C(=O)O	0	0	0	0	56.1305	18.0601	20.4334
226119	226119	CHEMBL135902	COc1cc2ncnc(Sc3cccc(Cl)c3)c2cc1OC	0	0	3	0	32.351	24.3848	31.4886
226723	226723	CHEMBL453146	CC(=O)Nc1nc2c(Oc3cc(-c4ccc(C(F)(F)F)cc4NC(=O)[C@H]4CCCN4CC(C)C)ncn3)cccc2s1	0	0	0	0	35.6106	10.6208	19.4724
226791	226791	CHEMBL1373481	COc1ccc(C(=O)NC(=S)Nc2ccc(S(=O)(=O)Nc3cc(OC)ncn3)cc2)cc1	0	0	0	0	25.1845	19.5938	18.7253
226796	226796	CHEMBL1366835	COc1ccc(OC)c(-c2csc(NC(=O)C3=NNC(=O)CC3)n2)c1	0	0	0	0	42.7014	37.6895	28.3993
226815	226815	CHEMBL1530679	COc1ccc(NC(=O)CSc2nnc3c(C)cc4ccccc4n23)cc1	0	0	0	0	50.7436	39.5173	31.2375
226917	226917	CHEMBL2207250	CCOC(=O)COc1ccc(-c2cccc(-c3csc(N)n3)c2)cc1	0	0	0	0	28.3937	20.8257	21.0005
227044	227044	CHEMBL3758785	COC(=O)CCCOc1ccc(-c2ccc(-c3noc(Cc4c[nH]c5ccccc45)n3)s2)cc1	0	0	0	0	46.8197	38.2707	29.5977
227052	227052	CHEMBL445056	CCCn1c(=O)c2nc(-c3cc(NC(=O)Cc4cccc(OC)c4)nn3C)[nH]c2n(CCC)c1=O	0	0	0	0	49.3973	35.2532	29.2122
227055	227055	CHEMBL4065430	Cc1cc(C#N)cc(C)c1Oc1nc(NC2CCC(NCc3cccc(C(N)=O)c3)CC2)nc2ccsc12	0	0	0	0	35.6606	10.7587	18.8518
227120	227120	CHEMBL3758582	COc1ccc(C(=O)NCCN(C)C)cc1-c1cc2c(N[C@H](C)c3ccccc3)ncnc2s1	0	0	3	0	26.8589	20.0561	19.1687
227127	227127	CHEMBL451513	O=C(O[C@H]1CN[C@H](C#Cc2cc3ncnc(Nc4ccc(OCc5cccc(F)c5)c(Cl)c4)c3s2)C1)N1CCCC1	0	0	3	0	35.5693	11.1431	16.3293
227135	227135	CHEMBL1345522	Cc1cccc(OCCCC(=O)Nc2ccc(S(=O)(=O)Nc3ncccn3)cc2)c1C	0	0	0	0	23.9216	21.0033	19.194
227325	227325	CHEMBL332893	CCc1noc(-c2nnc3c4c(c(OCc5cccc(C)n5)nn23)C2CCC4CC2)n1	0	0	0	0	51.9294	24.6999	34.355
227447	227447	CHEMBL314849	CCCOc1ccc(S(=O)(=O)N2CCN(CCO)CC2)cc1-c1nc2c(=O)n(C)c(=O)n(CC(C)C)c2[nH]1	0	0	0	0	15.2935	12.1028	14.4271
227858	227858	CHEMBL500640	CCOC(=O)O[C@H]1CN[C@H](C#Cc2cc3ncnc(Nc4ccc(OCc5cccc(F)c5)c(Cl)c4)c3s2)C1	0	0	3	0	36.3027	11.3796	16.3794
227981	227981	CHEMBL425301	CCCOc1cc(C)c2c(c1C)CC(C(C)C(=O)Nc1nc(C)cs1)CC2	0	0	0	0	34.9704	32.962	25.4859
228006	228006	CHEMBL1480327	Cc1sc2ncnc(N3CCC(C(=O)Oc4cccc(Cl)c4Cl)CC3)c2c1C	0	0	0	0	55.5477	16.2483	36.6308
228011	228011	CHEMBL3939129	C[C@@H]1CN(c2scnc2-c2nc3ccccc3[nH]2)CCN1C(=O)Cc1ccc2c(c1)NC(=O)CO2	0	0	0	4	51.3759	16.0495	24.8417
228181	228181	CHEMBL1426729	CCn1c(SCC(=O)Nc2nc(-c3ccccc3)cs2)nnc1-c1ccccc1O	0	0	0	0	46.3328	39.4098	21.2869
228200	228200	CHEMBL1894887	CCOC(=O)N1CCc2c(sc3c2c(=O)n(-c2ccc(Cl)cc2)c(=O)n3Cc2cccc(OC)c2)C1	0	0	0	0	33.9089	26.9362	32.7039
228642	228642	CHEMBL2017087	COc1cc2c(cc1OC)-c1c(-c3cncs3)ncn1CC2	0	0	0	0	31.5503	27.2986	35.4459
228802	228802	CHEMBL564004	CCc1sc2nc(N)[nH]c(=O)c2c1Sc1cc(OC)ccc1OC	0	0	0	0	29.1552	22.6246	20.4594
228952	228952	CHEMBL1568263	CCCc1c(O)nc(SCC(=O)NCCc2ccc(OC)c(OC)c2)nc1O	0	0	0	0	34.7345	26.79	25.3756
229011	229011	CHEMBL1761931	CCOC(=O)Nc1ccc(Nc2ncnc3cc(OC)c(OC)cc23)cc1	0	0	3	0	32.8518	22.0696	23.4927
229475	229475	CHEMBL292165	CCCCc1ncc(/C=C(\Cc2cccs2)C(=O)O)n1Cc1cccc(OC)c1	0	0	0	0	34.3945	30.7599	18.6604
229610	229610	CHEMBL1426984	COc1ccc(-c2cc(C(F)(F)F)nc(SCC(=O)Nc3ccc4c(c3)OCO4)n2)cc1OC	0	0	0	0	34.795	27.3051	25.6619
229662	229662	CHEMBL2018756	CCOC(=O)Nc1ccc(Nc2ncnc3cc(OC)c(OC)cc23)cc1C	0	0	3	0	32.8233	22.0567	23.4568
229670	229670	CHEMBL2016600	CCNC(=O)Nc1ccc(Nc2ncnc3cc(OC)c(OC)cc23)cc1	0	0	3	0	32.1667	21.5277	23.0974
229849	229849	CHEMBL1395155	COc1ccc(-c2nnc(SCC(=O)Nc3cccc(Cl)c3C)nc2-c2ccc(OC)cc2)cc1	0	0	0	0	51.6983	40.0679	26.986
229901	229901	CHEMBL3121322	COc1ncc(-c2ccc3nc(N)n(-c4ccccc4)c(=O)c3c2)cc1NS(=O)(=O)c1ccc(C#N)cc1	0	0	0	0	25.4892	19.281	18.5436
230013	230013	CHEMBL1377304	Cc1cn2c(=O)cc(COc3cccc(NC(=O)c4ccc(C(C)(C)C)cc4)c3)nc2s1	0	0	0	0	53.3596	16.7709	24.6987
230065	230065	CHEMBL2425524	COc1cccc2cc(C3SC(NC(C)=O)=NN3C(C)=O)c3nnnn3c12	0	0	0	0	56.2088	18.0082	26.9637
230069	230069	CHEMBL3263596	CCNC(=O)Nc1nc2cc(-c3cncnc3)c(OCC3CCOC3)nc2s1	0	0	0	0	53.6776	16.6909	26.3147
230191	230191	CHEMBL1572877	CCCCN(C)C(=O)CSc1nc(NCc2ccc(OC)cc2)c2ccccc2n1	0	0	0	0	27.2872	21.5978	20.7681
230608	230608	CHEMBL3121514	CC(C)(C)C#Cc1cc(N(C(=O)[C@H]2CC[C@H](C)CC2)[C@H]2CC[C@H](Oc3ccc4nccn4n3)CC2)c(C(=O)O)s1	0	0	0	0	52.7592	17.4036	19.6166
230647	230647	CHEMBL3085307	CCCCOCCOc1ccc(-c2ccc3c(c2)/C=C(/C(=O)Nc2ccc([S@@+]([O-])Cc4cncn4CCC)cc2)CCCN3CCC)cc1	0	0	0	0	29.5735	26.3347	22.036
230675	230675	CHEMBL2158560	CNC(=O)CSc1nc(-c2cc(OC)c(OC)cc2Cl)c2c(C#N)c[nH]c2n1	0	0	0	0	34.0484	28.8553	20.1647
230679	230679	CHEMBL2158568	CCOc1cc(-c2nc(SCC(=O)NC3CC3)nc3[nH]cc(C#N)c23)c(Cl)cc1OC	0	0	0	0	55.3535	18.5698	22.7861
230683	230683	CHEMBL3085311	CCCCOCCOc1ccc(-c2ccc3c(c2)/C=C(/C(=O)Nc2ccc([S@@+]([O-])Cc4cncn4CCC)cc2)CCCCN3CC(C)C)cc1	0	0	0	0	54.4748	17.701	25.6194
230744	230744	CHEMBL2019132	COc1cc(N)ccc1-c1nc2snc(-c3c(F)cccc3F)c2c(=O)[nH]1	0	0	0	0	36.1793	21.7523	22.0814
230771	230771	CHEMBL1522856	COc1ccccc1N1CCN(C(=O)CSc2nnc(-c3ccccc3Cl)[nH]2)CC1	0	0	0	0	63.9349	22.7002	25.9612
230938	230938	CHEMBL289361	COc1cccc2c1CCC1CN(CCn3c(=O)[nH]c4c(sc5ccccc54)c3=O)CC21	0	0	0	0	40.4997	12.4735	20.7528
231056	231056	CHEMBL1598605	COc1ccc(C(=O)N2CCN(c3ncnc4c(-c5ccccc5)nsc34)CC2)cc1	1	0	0	0	53.9316	16.333	32.9025
231132	231132	CHEMBL1585258	COc1ccc(Nc2cc3n(c(=O)n2)CCc2cc(OC)c(OC)cc2-3)cc1	0	0	0	0	32.8482	22.0152	23.5928
231226	231226	CHEMBL1310257	O=C(/C=C/c1ccc2c(c1)OCO2)Nc1nc(-c2ccc(F)cc2)cs1	0	0	0	0	34.2689	31.8392	26.7002
231333	231333	CHEMBL1389698	CCCCn1nc(NC(=O)CC(C)C)c2cc3cc(OC)ccc3nc21	0	0	0	0	54.5959	24.5441	28.0962
231376	231376	CHEMBL2316108	NS(=O)(=O)c1ccc2c(c1)sc1nc(-c3cc4cc(Br)ccc4oc3=O)cn12	0	0	0	0	28.4032	26.1572	20.2263
231428	231428	CHEMBL1369502	COc1ccc(CC(=O)Nc2nc(C(C)(C)C)cs2)cc1	0	0	0	0	58.6956	18.1526	27.1663
231534	231534	CHEMBL1497916	C=CCCC(=O)Nc1nc(C)c(-c2csc(Nc3cc(Cl)ccc3OC)n2)s1	0	0	0	0	28.9053	21.7432	17.3163
231642	231642	CHEMBL1571949	CCn1c(=O)[nH]c(=O)c2c(N)c(C(=O)c3ccccc3OC)sc21	0	0	0	0	28.5163	22.0458	20.2014
231899	231899	CHEMBL2086889	CCn1nc(-c2ccc(OC)cc2)nc2c(=O)n(C)c(=O)nc1-2	1	0	0	0	51.9384	34.6587	38.2133
232037	232037	CHEMBL1650172	CC(=O)Nc1nc(-c2ccc3c(c2)OCO3)cc(-c2ccc3c(c2)OCO3)n1	0	0	0	0	36.7186	27.1153	26.1752
232579	232579	CHEMBL1652674	Cc1ccc(-c2nc3c(N4CCN(C(=O)COc5ccc(Cl)cc5)CC4)nc(N)nc3s2)cc1	0	0	0	0	40.1242	12.6608	17.7551
232678	232678	CHEMBL3905784	COC[C@H](C)Oc1ccc2[nH]nc(-c3cc(N4CCC5(CCC(=O)N5)CC4)ncn3)c2c1	0	0	3	0	49.0035	21.882	26.0129
232709	232709	CHEMBL2018750	COc1cc2ncnc(Nc3ccc(NC(=O)OC(C)C)cc3)c2cc1OC	0	0	3	0	40.6596	14.3259	23.3551
232999	232999	CHEMBL1355039	COc1ccc(Cc2nnc(SCC(=O)N(c3ccccc3)C(C)C)n(N)c2=O)cc1	0	0	0	0	40.1872	12.6999	21.007
233007	233007	CHEMBL3392303	CC(=O)O.COc1cc(NCc2ccc3nc(N)nc(N)c3c2C)cc(OC)c1OC.O	0	0	0	0	30.6432	20.7466	22.6191
233078	233078	CHEMBL579590	C[C@@H](Oc1cc(-n2cnc3ccc(OCC4CCN(S(C)(=O)=O)CC4)cc32)sc1C(N)=O)c1ccccc1C(F)(F)F	0	0	0	0	16.3672	15.4559	15.2229
233135	233135	CHEMBL3392307	CC(=O)O.COc1cc(NCc2ccc3nc(N)nc(N)c3c2)cc(OC)c1OC.O	0	0	0	0	30.6721	20.7546	22.6249
233203	233203	CHEMBL3921017	C=CC(=O)N(C)CCn1nc(-c2ccc(Oc3ccccc3)cc2)c2c(N)ncnc21	0	0	3	0	34.2568	21.293	22.1849
233335	233335	CHEMBL4098060	O=C(N/N=C/c1ccc(F)cc1Cl)Nc1cc2c(Nc3ccc(F)c(Cl)c3)ncnc2cc1O[C@H]1CCOC1	0	0	0	0	35.9821	15.713	17.5093
233538	233538	CHEMBL420055	COc1cc(C(=O)NS(=O)(=O)c2ccccc2)ccc1Cn1cnc2ccc(NC(=O)CC3CCCC3)cc21	0	0	0	0	15.4857	14.7893	14.7673
233574	233574	CHEMBL3350102	O=C(CN1[C@@H](COc2ccccc2)[C@@H](O)[C@H](O)[C@H](COc2ccccc2)N(Cc2ccccc2)S1(=O)=O)Nc1nccs1	1	0	0	0	18.1863	17.7628	17.0448
233678	233678	CHEMBL2046733	C#Cc1cccc(NC(=O)Nc2nnc(Sc3ncnc4cc(OCCOC)c(OCCOC)cc34)s2)c1	0	0	0	0	47.1669	37.8814	31.386
233727	233727	CHEMBL356928	COc1ccc(Cn2c(N(S(=O)(=O)c3ccccc3)S(=O)(=O)c3ccccc3)nc3c2c(=O)n(CC2CC2)c(=O)n3CC2CC2)cc1	0	0	0	0	17.4263	16.1292	19.2834
233753	233753	CHEMBL3504490	CCOC(=O)[C@]12CCCN(Cc3nccs3)C[C@H]1CN(CCN(C)C)C2.O=C(O)C(F)(F)F.O=C(O)C(F)(F)F.O=C(O)C(F)(F)F	0	0	0	0	13.8402	1.6852	19.1267
233794	233794	CHEMBL1652666	Nc1nc(N2CCN(C(=O)COc3ccc(Cl)cc3)CC2)c2cc(-c3ccc(F)cc3)sc2n1	0	0	0	0	40.2036	12.7276	17.8742
233804	233804	CHEMBL78038	CCCCCCCCCCCCn1nnc(C(C(=O)Nc2c(OC)ncnc2OC)c2ccccc2)n1	0	0	0	0	52.5837	36.0569	30.4418
234022	234022	CHEMBL1356635	COc1ccccc1C(=O)NCCC(=O)Nc1ccc(S(=O)(=O)Nc2ncccn2)cc1	0	0	0	0	24.3869	21.4084	18.8927
234033	234033	CHEMBL1395602	Cc1sc2ncnc(N3CCC(C(=O)NNC(=O)COc4ccccc4Cl)CC3)c2c1C	0	0	0	0	54.8036	17.7163	22.5581
234308	234308	CHEMBL1512189	CCOc1ccc(NC(=O)CSc2nnc(-c3ccc(C)cc3)c(-c3ccc(C)cc3)n2)cc1	0	0	0	0	51.3079	39.2812	31.3389
234409	234409	CHEMBL1486983	O=c1c(-c2ccccc2)nnc2sc(COc3ccc(Br)cc3)nn12	0	0	0	0	47.8	38.8084	38.5324
234419	234419	CHEMBL1411221	COc1cc(NC(=O)CSc2ncnc3sc4c(c23)CCC(C)C4)c(C(=O)O)cc1OC	1	0	0	0	34.9072	28.6731	17.6275
234432	234432	CHEMBL1366943	COc1cccc(-c2nnc(SCC(N)=O)n2-c2ccc(Cl)cc2)c1	0	0	0	0	62.9396	42.281	30.2726
234485	234485	CHEMBL1258063	CCCSc1nnc2c(n1)O[C@@H](c1ccccc1F)N(C(=O)CC)c1ccccc1-2	0	0	0	0	51.8582	38.6372	39.7264
234612	234612	CHEMBL1902892	Cc1ccc(OCCSc2nnc(C)c(=O)n2N)cc1	0	0	0	0	36.4864	21.7902	23.257
234645	234645	CHEMBL4064270	COc1cc2ncnc(Nc3ccc(F)c(Cl)c3)c2cc1NC(=O)N/N=C/c1ccc(F)cc1	0	0	0	0	34.2724	21.6668	18.4515
234838	234838	CHEMBL2017063	COc1cc2c(cc1OC)-c1c(-c3cnc(C)s3)ncn1CC2	0	0	0	0	31.6066	27.1097	35.3785
234849	234849	CHEMBL3193280	COc1ccc(C(=O)/N=c2\sccn2C)cc1	0	0	0	0	33.6521	31.7071	31.5291
235100	235100	CHEMBL2019119	CNC(=O)C1CCN(c2ccc(-c3nc4snc(C5CCCCC5)c4c(=O)[nH]3)c(OC)c2)CC1	0	0	0	0	53.74	17.1263	25.3904
235136	235136	CHEMBL278930	CCCc1cc(Cn2c(CC)nc3c(C)cc(C)nc32)cc(CCC)c1OC(C(=O)NS(=O)(=O)c1cccs1)c1ccc2c(c1)OCO2	0	0	0	0	26.7073	23.874	22.5615
235165	235165	CHEMBL1975823	COc1ccc([N+](=O)[O-])cc1NS(=O)(=O)c1c(C)nc2scc(C)n2c1=O	0	0	0	0	20.4186	15.1145	16.4382
235326	235326	CHEMBL1413319	CCCN(CCC)C(=O)CSc1nc(O)c2sc(=S)n(-c3ccc(OCC)cc3)c2n1	0	0	0	4	33.8051	27.0252	24.5834
235488	235488	CHEMBL1800786	COc1cc(-c2nc3c([nH]2)C2=N[C@H](C)CN2C(=O)N3Cc2ccccc2)n(C)n1	0	0	0	0	50.5767	34.6454	30.2789
235542	235542	CHEMBL1257470	CCC(=O)N1c2ccccc2-c2nnc(SC)nc2O[C@H]1c1ccc(OC)c(C)c1	0	0	0	0	51.5157	38.1542	39.5444
235557	235557	CHEMBL1508300	COc1ccc(C(=O)CSc2cc(C)nc(SCC(=O)c3ccc(C)cc3)n2)cc1	0	0	0	0	34.0829	26.0297	29.1739
235756	235756	CHEMBL41396	COc1cccc2c1CC[C@H]1CN(CCn3c(=O)[nH]c4c(sc5c(Cl)cccc54)c3=O)C[C@@H]21	0	0	0	0	40.5284	12.8098	18.0654
235785	235785	CHEMBL4082398	COc1cc2ncnc(Nc3ccc(F)c(Cl)c3)c2cc1NC(=O)N/N=C/c1ccc(O)cc1O	0	0	0	0	31.867	20.1971	17.3531
236441	236441	CHEMBL1733803	O=C(O)C1CCN(c2ncc(-c3ccc4c(c3)OCCCO4)s2)CC1	0	0	0	0	54.8369	17.6604	20.4458
236461	236461	CHEMBL246689	COc1ccc(-n2c(SC)nc3sc4c(c3c2=O)CCCC4)cc1	0	0	0	0	33.0433	26.0444	28.7681
236479	236479	CHEMBL2046725	COCCOc1cc2ncnc(Sc3nc(CC(=O)Nc4cc(C)cc(C)c4)cs3)c2cc1OCCOC	0	0	0	0	35.3756	28.4367	25.9936
236496	236496	CHEMBL1719232	CC(C)Oc1cccc(-c2cnc(N3CCC(C(N)=O)CC3)s2)c1	0	0	0	0	54.8141	16.888	26.278
236520	236520	CHEMBL251328	CCOc1ccc(-n2c(SCC#N)nc3sc4c(c3c2=O)CCC4)cc1	0	0	0	0	33.3767	26.3492	29.1853
236636	236636	CHEMBL126769	CCOc1cc2ncnc(Nc3cc(-c4csc(C)n4)ccc3Cl)c2cc1OCC	0	0	0	0	27.5277	19.6357	36.7499
236742	236742	CHEMBL3483693	O=C1CC2(CCCC2)CC(=O)N1Cc1nccs1	0	0	0	0	10.0875	1.16143	17.7628
236886	236886	CHEMBL1441783	COc1ccc(-c2nnc(SCC(=O)Nc3cc(OC)ccc3OC)nc2-c2ccc(OC)cc2)cc1	0	0	0	0	50.616	38.983	31.08
237330	237330	CHEMBL3500944	O=C(C1CCOCC1)N1C[C@@H]2C[C@@H](c3nc(C4CC4)cs3)O[C@@H]2C1.O=C(O)C(F)(F)F	0	0	0	0	12.5059	1.44321	17.9575
237511	237511	CHEMBL3342189	O=C(Nc1nc2ccccc2s1)c1cccc2c1CN(c1nc(C(=O)O)c(CCOc3cccc(-n4ncc5cncnc54)c3)s1)CC2	0	0	0	0	45.4905	38.267	22.5399
237596	237596	CHEMBL1448696	COc1ccccc1/C=C1\SC(=S)N(Nc2nc(C)cc(C)n2)C1=O	0	0	0	0	57.9142	18.6539	27.1002
237691	237691	CHEMBL3109709	Cc1nc2ccccc2c(=O)n1C(=S)NC(=O)Nc1nc2ccc(OC(F)(F)F)cc2s1	0	0	0	0	34.5212	28.1316	23.4617
237755	237755	CHEMBL1416007	CC(C)c1ccc(OCC(=O)Nc2ccc(S(=O)(=O)Nc3ncccn3)cc2)cc1	0	0	0	0	16.5556	14.5704	15.8911
237894	237894	CHEMBL491473	COc1cc2c(Oc3ccc4[nH]c(C)cc4c3F)ncnc2cc1OCCCN1CCCC1	0	0	3	4	35.3246	11.2994	30.9683
237980	237980	CHEMBL1353738	COc1ccc(O)c(C(=O)c2cc(SCC(=O)O)c3nc4sc5c(c4c(=O)n3c2)CCCC5)c1	0	0	0	0	35.0357	28.9195	17.8511
238026	238026	CHEMBL1726923	COc1cccc(-c2csc(N3CCC(C(N)=O)CC3)n2)c1	0	0	0	0	55.5078	17.1198	26.3391
238041	238041	CHEMBL503167	CCn1c(Sc2ccc(Nc3c(C#N)cnc4cc(OCCCN5CCC(O)C5)c(OC)cc34)cc2Cl)nc(C)c1C	0	0	3	0	32.8408	8.27273	32.9961
238058	238058	CHEMBL1455891	COc1ccc(-c2csc(N3CCC(C(N)=O)CC3)n2)cc1	0	0	0	0	55.3518	17.061	26.2831
238154	238154	CHEMBL291073	COc1cccc2c1CC[C@H]1CN(CCn3c(=O)[nH]c4c(sc5cc(C(N)=O)ccc54)c3=O)C[C@@H]21	0	0	0	0	37.3415	11.374	19.6844
238333	238333	CHEMBL3470999	CS(=O)(=O)N[C@@H]1CCO[C@]2(CCN(C(=O)c3cscn3)C2)C1	0	0	0	0	4.94726	3.06138	2.95808
238552	238552	CHEMBL116454	CNC(=O)c1cc2c(Oc3ccc(-c4noc(C(F)(F)F)n4)cc3)cncc2s1	0	0	0	0	48.5258	39.7758	29.36
238674	238674	CHEMBL2288124	O=c1nc(-c2c(F)cccc2F)sn1-c1ccc(OC(F)(F)F)c(Cl)c1Cl	0	0	0	0	58.3105	32.6275	44.101
238766	238766	CHEMBL1454437	COc1ccc(-c2nc3c(c(SCC(=O)Nc4ccccc4OC)n2)Cc2cccc(C)c2O3)cc1	0	0	0	0	34.7707	27.4402	24.1768
238998	238998	CHEMBL460864	C/C(=C\c1csc(C)n1)[C@@H]1C/C=C\CCCC(C)C[C@H](C)[C@H](O)[C@@H](C)C(=O)C(C)(C)[C@@H](O)CC(=O)O1	0	0	0	0	6.10584	1.56626	1.56978
239118	239118	CHEMBL2234432	COc1ccc(Nc2nc3c(sc(=S)n3-c3ccccc3OC)c(=O)n2-c2ccc(OC)cc2)cc1	0	0	0	0	28.5138	21.9471	21.2451
239169	239169	CHEMBL267380	Cc1sc2nc(SCC#N)n(-c3ccc(OC(F)(F)F)cc3)c(=O)c2c1C	0	0	0	0	33.049	25.9487	28.7518
239254	239254	CHEMBL2163635	COc1cc(C(=O)c2c[nH]c(-c3csc4ccccc34)n2)cc(OC)c1OC	0	0	0	0	31.4375	27.7366	25.6939
239355	239355	CHEMBL1892367	NC(Cc1ccc(C(F)(F)F)cc1)c1csc(Nc2cc(NCc3ccco3)ncn2)n1	0	0	0	0	27.336	20.3946	17.9661
239725	239725	CHEMBL1733132	COc1ccc(OC)c(-c2csc(NC(=O)COC(=O)C3CCC3)n2)c1	0	0	0	0	56.0582	17.2612	26.4847
239866	239866	CHEMBL3416526	COc1ccc(-c2nnc(SC3CC(=O)N(c4ccc(Cl)cc4)C3=O)[nH]2)cc1	0	0	0	0	62.4216	43.0619	30.4597
239953	239953	CHEMBL1609699	COc1ccc(-c2csc(N(Cc3ccccc3)C(=O)c3ccccc3Cl)n2)cc1	0	0	0	0	34.3757	31.3781	34.7376
239954	239954	CHEMBL1326289	COc1ccc(-c2csc3ncnc(Nc4ccc(OC)c(OC)c4)c23)cc1	0	0	0	0	27.7797	20.4611	32.3304
239959	239959	CHEMBL559209	COc1ccccc1N1CCN(c2nc3c(cc2F)c(=O)c(C(=O)O)cn3-c2nccs2)CC1.Cl	0	0	0	0	54.3111	17.8077	20.2855
240014	240014	CHEMBL1589609	CCCCSc1nc2sc3c(c2c(=O)n1-c1ccc(OC)cc1)CCN(C)C3	0	0	0	0	27.5403	21.006	24.9346
240176	240176	CHEMBL1086295	COc1ccc(Cn2ncc3[nH]c(-c4ccc(NC(=O)Nc5nc6ccc(C)cc6s5)cc4C)nc32)cc1	0	0	0	0	45.4638	37.5541	29.4107
240237	240237	CHEMBL1094181	NC(=O)c1c(F)ccc(OCc2nc3ncc(Cl)cc3s2)c1F	0	0	0	0	33.7177	28.4488	20.4464
240323	240323	CHEMBL251565	CC(=O)Nc1nc2c(Oc3cc(-c4ccc(C(F)(F)F)cc4)nc(C4=CCN(C(=O)OC(C)(C)C)CC4)n3)cccc2s1	0	0	0	0	52.4025	16.3268	25.6
240361	240361	CHEMBL240302	COc1ccc(C2C(Cl)C(=O)N2NCc2nc3ccc(Br)cc3c(=O)n2-c2nc(-c3ccc(Cl)cc3)cs2)cc1	0	0	0	0	47.2691	39.3662	26.1768
240410	240410	CHEMBL1493002	O=C(Oc1ccccc1)N1CCC[C@@]2(CCN(Cc3nccs3)C2)C1	0	0	0	0	41.8899	11.6912	25.9251
240486	240486	CHEMBL4174328	Cc1cc(C#N)cc(C)c1Oc1nc(NC2CCC(NC(=O)c3cccc(C(F)(F)F)c3)CC2)nc2ccsc12	0	0	0	0	38.3367	11.6771	19.8228
240643	240643	CHEMBL227154	CC(=O)Nc1nc2c(Oc3cc(N4CCNCC4)ncn3)cccc2s1	0	0	0	0	38.0618	11.3723	20.9599
240827	240827	CHEMBL1712139	CCc1cc2c(=O)n(CC(=O)NCCc3ccc(OC)c(OC)c3)cnc2s1	0	0	0	0	34.0481	27.416	25.917
240833	240833	CHEMBL1581333	Cn1c(=O)c2c(nc(SCC(=O)O)n2Cc2cc3c(cc2Cl)OCO3)n(C)c1=O	0	0	0	0	34.9515	29.8771	19.2246
240865	240865	CHEMBL1442453	COc1ccc(Nc2nnc(SCc3cc(=O)n4ccsc4n3)s2)cc1	1	2	0	0	34.6524	20.75	22.0563
241177	241177	CHEMBL4080186	O=C1COc2ccc(CNC(=O)c3nc4scc(C5CCCCC5)c4c(=O)[nH]3)cc2N1	1	0	0	0	52.8436	16.8859	24.2709
241545	241545	CHEMBL1784309	COc1ccc(-c2ccc3c(c2)n2ncc(C(=O)OCc4cccs4)c2n[n+]3[O-])cc1	0	0	0	0	34.7712	20.4773	27.0605
241652	241652	CHEMBL3976187	CO[C@H]1CN(c2nc(-c3cc(C)ccc3OCc3ccc4c(c3C)CCN(C[C@@H]3CCOC3)C4)cs2)CC[C@H]1C(=O)O	0	0	0	0	26.9117	8.06334	20.5185
242082	242082	CHEMBL2017060	COc1cc2c(cc1OC)-c1c(-c3cnc(C(=O)N4CCCOCC4)s3)ncn1CC2	0	0	0	0	53.6196	16.0446	31.0358
242086	242086	CHEMBL2017059	COc1cc2c(cc1OC)-c1c(-c3cnc(C(=O)N4CCOCC4)s3)ncn1CC2	0	0	0	0	53.5085	16.0295	30.9565
242249	242249	CHEMBL2017637	COc1ccc(-n2c(SC(C)C(=O)Nc3ccc(C)cc3Cl)nc3ccccc32)cc1	0	0	0	0	34.3126	29.609	20.5007
242416	242416	CHEMBL1426059	CCOC(=O)Cc1csc(NC(=O)NC2(C(F)(F)F)Oc3cc(Cl)c(Cl)cc3O2)n1	0	0	0	0	34.784	32.93	21.5064
242538	242538	CHEMBL1701707	COc1ccccc1CNC(=O)C1CCCN(S(=O)(=O)c2c(C)nc(O)nc2O)C1	0	0	0	0	16.64	14.5671	15.4949
242676	242676	CHEMBL1836718	COc1ccc(-c2cc3ncnc(SCC(=O)O)c3s2)cc1	0	0	3	0	34.1578	27.6961	17.7823
242763	242763	CHEMBL1890582	COc1ccccc1-c1nnc(SCC(=O)Nc2cccnc2Cl)n1C	0	0	0	0	49.885	39.6113	26.5693
242914	242914	CHEMBL1895961	COc1ccc(-c2cn3c(n2)sc2cc(C(=O)NCCc4ccc(OC)cc4OC)ccc23)cc1	0	0	0	0	35.8729	31.3803	24.5376
243071	243071	CHEMBL1086629	CCOP(=O)(OCC)C(OC(C)=O)c1cc2ccc(OC)cc2n2nnnc12	0	0	0	0	52.9548	35.1692	38.7754
243098	243098	CHEMBL2093821	O=C(COc1ccc(Cl)cc1Cl)N(Cc1ccccn1)c1nc2ccccc2s1	0	0	0	0	33.3203	29.7621	33.7507
243273	243273	CHEMBL1625845	CN(C)CCCN(C(=O)COc1ccccc1)c1nc2ccc(Cl)cc2s1	0	0	0	0	27.97	20.2733	27.465
243287	243287	CHEMBL247319	COc1ccc(-n2c(SC(C)=O)nc3sc4c(c3c2=O)CCCC4)cc1	0	0	0	0	33.1028	26.0998	28.812
243412	243412	CHEMBL3478951	COc1cc(C)c(C2CC(=O)NCc3nc4sccn4c32)cc1C	0	0	0	0	33.274	29.6308	24.0224
243432	243432	CHEMBL1554714	COc1ccccc1-c1cc2nc(C)c(CCC(=O)NC3CCCCC3)c(C)n2n1	0	0	0	0	51.8336	23.3307	27.0054
243472	243472	CHEMBL4169000	Cc1cc(C#N)cc(C)c1Oc1nc(NC2CCC(NC(=O)c3ccc(Br)cc3)CC2)nc2ccsc12	0	0	0	0	38.3069	11.6705	19.751
243599	243599	CHEMBL1409865	CCOC(=O)CSc1nc2c(sc(=S)n2Cc2ccco2)c(=O)n1-c1ccc(F)cc1	0	0	0	0	34.1994	27.179	30.5686
243911	243911	CHEMBL238619	COc1ccc(C2SCC(=O)N2NCc2nc3ccc(Br)cc3c(=O)n2-c2nc(-c3ccc(Cl)cc3)cs2)cc1	0	0	0	0	54.1561	17.4496	22.6098
243912	243912	CHEMBL2046714	COc1cc2ncnc(Sc3nc(C)c(CC(=O)Nc4ccc(NC(C)=O)cc4)s3)c2cc1OC	0	0	0	0	35.6183	28.5314	26.2005
244278	244278	CHEMBL280365	COc1cccc(-n2c(=O)c3c(CN(C)Cc4ccccc4)c(-c4ccc(NC(=O)C(C)C)cc4)sc3n(Cc3c(F)cccc3F)c2=O)c1	0	0	0	0	38.0401	11.6058	19.9522
244346	244346	CHEMBL404537	COc1ccccc1N1CCN(c2nc3[nH]nc(NC(=O)C4CC4)c3cc2F)CC1	0	0	0	0	50.8368	22.8241	26.9686
244367	244367	CHEMBL4093692	CC(C)(C)c1cc(NC(=O)Nc2ccc(-n3nc(-c4ccc(Oc5ccccc5)cc4)c4c(N)ncnc43)cc2)no1	0	0	0	0	32.9382	14.9019	20.0072
244623	244623	CHEMBL1709581	COc1cccc(C(=O)NC2CCN(CC(=O)Nc3nccs3)CC2)c1	0	0	0	0	40.3438	12.0182	20.5143
244763	244763	CHEMBL1616033	COc1ccc2sc(N(CCN(C)C)C(=O)c3cc(Cl)sc3Cl)nc2c1	0	0	0	0	28.0501	20.315	27.5164
244994	244994	CHEMBL250185	CC(=O)Nc1nc2c(Oc3cc(-c4ccc(C(F)(F)F)cc4)nc(N4CCCCC4)n3)cccc2s1	0	0	0	0	54.1733	16.8902	26.1651
245087	245087	CHEMBL398410	CC(=O)Nc1nc2c(Oc3cc(-c4ccc(C(F)(F)F)cc4)nc(N)n3)cccc2s1	0	0	0	0	27.8622	20.8336	20.5831
245102	245102	CHEMBL1501755	COc1ccccc1-c1cc(C(F)(F)F)nc(S(=O)(=O)CCCC(=O)NCc2ccc(F)cc2)n1	0	0	0	0	26.8041	22.9585	20.6098
245306	245306	CHEMBL3198554	CCCCSc1nc(C)cc(SCC(=O)N/N=C/c2cccc(OC)c2O)n1	0	0	0	0	50.2422	39.0179	32.5214
245320	245320	CHEMBL420589	N=C(N)N1CCCC(C[C@H](NC(=O)CN2C(=O)CN(CCCc3ccc(O)cc3)C(=O)[C@H]2Cc2ccccc2)C(=O)c2nccs2)C1	1	0	0	0	32.6442	10.194	12.077
245760	245760	CHEMBL474419	COC(=O)c1ccc(COc2ccc(Nc3nccc(-c4nccs4)n3)cc2)cc1	0	0	3	0	27.8238	21.004	19.4806
245777	245777	CHEMBL2220875	COc1ccc(CN(C)C(=O)Cn2ccsc2=N)cc1OC	0	0	0	0	35.1981	33.0153	27.0945
246112	246112	CHEMBL1964269	COc1cc(N2CCC(N3CCN(S(C)(=O)=O)CC3)CC2)ccc1Nc1nc(Nc2ccsc2C(N)=O)c2cc[nH]c2n1	0	0	3	0	14.1127	11.1574	13.4239
246483	246483	CHEMBL209061	COc1ccc(-n2nc3c(NC(=O)C(c4ccccc4)c4ccccc4)nc4c(N)cccc4n3c2=O)cc1	0	0	0	0	34.018	21.2603	21.7113
246642	246642	CHEMBL3298749	COc1ccccc1N1CCN(CCn2c(=O)[nH]c3c(sc4ccc(NC(=O)CCC(=O)NCc5ccccc5)cc43)c2=O)CC1	0	0	0	0	33.7492	10.2512	18.3233
246885	246885	CHEMBL1356939	COc1ccccc1NC(=O)C1=C(C)Nc2nc3ccccc3n2C1c1cccc(Br)c1	0	0	0	0	35.1852	22.6756	22.551
246892	246892	CHEMBL1739016	NCCOc1ccccc1C(=O)Nc1ncc([N+](=O)[O-])s1	0	0	0	0	35.0817	17.4933	20.1747
246979	246979	CHEMBL274991	COc1ccc(-c2csc(NC(=O)C(=O)O)n2)c(OC)c1	0	0	0	0	34.786	33.2151	18.6221
247075	247075	CHEMBL1417240	COc1ccccc1-c1nc2ccccc2c(=O)n1NC(=O)c1cccs1	1	0	0	0	49.3877	40.5813	30.2137
247369	247369	CHEMBL214999	COc1cc2c(cc1OC)Sc1ncnc(Nc3cccc(Cl)c3F)c1NC2	0	0	3	0	26.5624	19.3393	36.1256
247687	247687	CHEMBL321587	Cc1ccc(S(=O)(=O)[O-])cc1.Cc1cccc2n1cc(-c1ccc(COc3ccc(/C=N/NC(=O)c4ccc(N)cc4)cc3)cc1)[n+]2C	0	0	0	0	24.0839	17.4645	17.4526
247734	247734	CHEMBL1762504	CCCn1c(CCc2ccc(Cl)cc2)nnc1CN1C(=O)COc2c(Cl)cc(Cl)cc21	0	0	0	0	58.7974	38.7569	46.6498
247762	247762	CHEMBL1762492	CCn1c(CN2C(=O)COc3ccc(C)cc32)nnc1SCc1ccc(Cl)cc1	0	0	0	0	60.6982	40.6038	47.9521
247915	247915	CHEMBL3305865	CC1=CC(=O)N(Nc2nc(-c3cccs3)nc3scc(-c4cccc(OCCN5CCOCC5)c4)c23)C1=O	0	0	0	0	36.987	11.2731	20.0354
248022	248022	CHEMBL3290633	CC1=CC(=O)N(Nc2nc(-c3cccs3)nc3scc(-c4cccc(OCCN(C)C)c4)c23)C1=O.Cl	0	0	3	0	33.6823	20.1327	21.599
248190	248190	CHEMBL352681	N=C(N)NCCC[C@H](NC(=O)CN1CCN(S(=O)(=O)Cc2ccccc2)[C@H](CC(=O)O)C1=O)C(=O)c1nccs1	1	0	0	0	15.4241	11.8611	6.96648
248192	248192	CHEMBL1761929	COC(=O)Nc1ccc(Nc2ncnc3cc(OC)c(OC)cc23)cc1	0	0	3	0	32.9828	22.1205	23.6035
248236	248236	CHEMBL1277253	COc1cc2ncnc(Oc3cccc(NC(=O)Nc4ccccc4)c3)c2cc1OC	0	0	3	0	36.9424	27.8581	26.3298
248729	248729	CHEMBL1762497	CCCn1c(CCc2ccc(Cl)cc2)nnc1CN1C(=O)COc2ccc(C(F)(F)F)cc21	0	0	0	0	58.9346	38.9352	46.7321
248733	248733	CHEMBL1396919	CN1CCN(C(c2ccccc2Cl)c2sc3nc(-c4ccco4)nn3c2O)CC1	0	0	0	0	40.3504	12.6041	18.5963
249297	249297	CHEMBL3904825	COc1ccccc1-c1nc2c(n1C(C)C)C(c1ccc(Cl)cc1)N(c1cccc(Cl)c1F)C(=O)N2	0	0	0	0	54.8001	21.0138	23.1913
249439	249439	CHEMBL1299291	CC(C)CSc1nc2c(c(=O)[nH]c(=O)n2C)n1CC(O)COc1cccc2ccccc12	0	2	0	0	54.4871	17.7105	26.249
249683	249683	CHEMBL1315828	COc1ccc(CNC(=O)CSc2nc(-c3ccc(OC)c(OC)c3)cc(C(F)(F)F)n2)cc1	0	0	0	0	34.6861	27.027	25.5184
250297	250297	CHEMBL3337876	COc1cccc(CNC(=O)c2nc3sc(C)c(C)c3c(=O)[nH]2)c1	1	0	0	0	33.3536	27.0922	22.8703
250386	250386	CHEMBL401768	O=C([O-])c1csc(Nc2cc(Cl)ccc2OCc2ccccc2)n1.[Na+]	0	0	0	0	29.8776	22.7617	16.5328
250644	250644	CHEMBL1534503	COc1ccccc1-c1cc(C(F)(F)F)nc(S(=O)(=O)CCCC(=O)N2CCCCC2C)n1	0	0	0	0	17.8717	15.7182	18.8399
251018	251018	CHEMBL3751951	O=C(O)c1csc(SCCN2C(=O)OC[C@@H]2/C=C/[C@@H](O)C2(CCCCF)CCC2)n1	0	0	0	0	6.17	1.76629	0.928343
251039	251039	CHEMBL534670	COc1ccc(NC(=O)CCNc2cc(C)nc(NCc3ccccc3C)n2)cc1	0	0	0	0	30.0578	20.4571	20.9661
251094	251094	CHEMBL3343935	CCOC(=O)C1=C(c2ccccc2)N=c2s/c(=C\c3ccc(-c4cccc(C(=O)O)c4)o3)c(=O)n2C1c1ccc(Cl)cc1	0	0	0	0	38.4662	35.7836	21.3954
251319	251319	CHEMBL1406382	COc1cccc(NC(=O)Cn2cnc3sc(C)c(S(=O)(=O)N4CCN(C)CC4)c3c2=O)c1	0	0	0	0	15.7881	12.44	14.2045
251331	251331	CHEMBL1724655	CCCn1c(SCC(=O)Nc2nc(-c3ccc(OC)cc3)cs2)nc2c1c(=O)n(C)c(=O)n2C	0	0	0	0	35.6679	29.2486	24.5871
251427	251427	CHEMBL227315	CC(=O)Nc1nc2c(Oc3cc(N4CCN(C(C)(C)c5ccccc5)CC4)ncn3)cccc2s1	0	0	0	0	37.2404	11.2004	20.2934
251686	251686	CHEMBL1578054	CN(C)CCCN(C(=O)COc1ccccc1)c1nc2ccc(Cl)cc2s1.Cl	0	0	0	0	27.9619	20.2631	27.4346
251797	251797	CHEMBL1394980	O=C(CSc1nc(-c2ccccc2)[nH]c1-c1ccccc1)Nc1ccc2c(c1)OCO2	0	0	0	0	34.5532	29.2749	26.0327
251849	251849	CHEMBL1345934	COc1ccc(C(=O)N/C(=C/c2cccs2)c2nc3ccccc3[nH]2)cc1OC	0	0	0	0	32.76	28.5707	25.9909
251983	251983	CHEMBL1184240	CCCCCCCCCCCCCCC1COC(COCCCCCCCC[n+]2ccsc2)C1	0	0	0	0	8.97641	0.554031	21.775
252039	252039	CHEMBL1334158	C=CCn1c(SCC(=O)Nc2nccs2)nnc1-c1ccco1	0	0	0	0	47.8159	39.878	27.8364
252272	252272	CHEMBL2107736	COc1ccc(CNc2nc([C@H]3CC[C@H](C(=O)O)CC3)nc3sc4ccccc4c23)cc1Cl	0	0	0	0	39.7651	12.7201	16.4008
252376	252376	CHEMBL1180379	CCCCCCCCCCCCCCCCC1COC(COCCCCCCC[n+]2ccsc2)C1	0	0	0	0	8.96449	0.583674	21.6491
252586	252586	CHEMBL1740627	CN(C)CCCN(C(=O)COc1ccccc1)c1nc(CC(=O)Nc2ccc(Cl)cc2)cs1	0	0	0	0	28.071	20.8574	17.0403
252623	252623	CHEMBL1604048	Cc1cn2c(=O)cc(COc3ccc(C(C)(C)C)cc3)nc2s1	0	0	0	0	57.2585	17.1603	34.0075
252751	252751	CHEMBL514180	COc1ccccc1-n1c(-c2sc(Nc3ccc(Cl)cc3)nc2C)nc2ccccc2c1=O	0	0	0	0	28.8267	22.2349	17.6074
252790	252790	CHEMBL1479512	COc1cc(C)ccc1OCCSc1nc(-c2cccc(C)c2)nc2cc(=O)[nH]n12	0	0	0	0	50.0414	38.8539	32.5356
253111	253111	CHEMBL208901	COc1cc(C)c(Sc2cnc(NC(=O)C3CC3)s2)cc1C(=O)N1CCN(C(=O)CN(C)C)CC1	0	0	3	0	36.1777	10.6516	19.1592
253394	253394	CHEMBL551183	CC(CO)Oc1cc(Oc2ccc(S(C)(=O)=O)cc2)cc(C(=O)Nc2nccs2)c1	0	0	0	0	29.2022	28.524	21.7601
253512	253512	CHEMBL377399	COc1cccc(-c2nc(SC)nc3sc(C(=O)N(C)C(C)(C)C)c(N)c23)c1	0	0	0	0	43.3832	13.4257	21.651
253565	253565	CHEMBL16230	COc1cc(-c2csc(NC(=O)C(=O)O)n2)cc(OC)c1OC.NCCO	0	0	0	0	29.5101	22.3155	15.133
253839	253839	CHEMBL34705	COc1cc2c(cc1OC)-c1cc(N(C)c3c(C)cc(C)cc3C)nc(=O)n1CC2	0	0	0	0	36.6589	26.7495	29.2541
253994	253994	CHEMBL1599538	COc1cc(NC(=O)CSc2nc(=O)n(CCCN3CCOCC3)c3c2CCC3)cc(OC)c1	0	0	0	0	36.2918	11.2978	20.2021
254119	254119	CHEMBL455482	C#CCCCC[C@@H](C)C(=O)N(C)[C@@H](C)C(=O)N(C)[C@H](C(=O)N1CCC[C@H]1C(=O)N(C)[C@H](C(=O)N(C)[C@H](C(=O)N(C)[C@@H](Cc1ccc(OC)cc1)C(=O)N1CCC[C@H]1c1nccs1)C(C)C)C(C)C)C(C)C	0	0	0	0	49.1252	14.0068	29.3569
254278	254278	CHEMBL1496236	COc1ccc(C2CC(c3ccccc3)=NN2C(=O)COC(=O)c2nc3nc(C)cc(C)n3n2)cc1	0	0	0	0	50.2944	35.5054	37.6011
254397	254397	CHEMBL1595092	O=C(COc1ccccc1)N(Cc1ccccc1)c1nc(-c2ccccc2)cs1	0	0	0	0	34.351	31.7014	30.7825
254570	254570	CHEMBL1369422	Cc1cc(OCC(=O)Nc2cc(-c3nn4c(C)nnc4s3)ccc2C)ccc1Cl	1	2	3	0	62.3286	44.4722	30.8676
254969	254969	CHEMBL2409831	COc1cc2ncnc(Nc3ccc(C(F)(F)F)cc3)c2c(OC)c1OC	0	0	0	0	33.9124	21.7534	35.9217
255026	255026	CHEMBL3806066	COCCOc1cc2ncnc(Nc3cccc(OC)c3)c2c2c1OCCO2	0	0	3	0	32.2528	20.599	34.5055
255162	255162	CHEMBL2403488	CCOc1ccc(CC(=O)Nc2nc(-c3ccccc3)cs2)cc1OCC	0	0	0	0	34.0164	31.8471	26.7519
255174	255174	CHEMBL1946746	COc1ccc(C2=NNC(=O)CC2C)c2nc(C(F)(F)F)nn12	0	0	0	0	53.0718	35.9124	30.7056
255256	255256	CHEMBL2402237	COc1ccc(-c2cc3[nH]c(=S)[nH]c(=O)n3n2)cc1	0	0	0	0	51.1536	40.4729	31.3092
255418	255418	CHEMBL3805562	O=C(COc1cccc(Oc2ccccc2)c1)Nc1ncc([N+](=O)[O-])s1	0	0	0	0	35.1094	17.2243	21.9063
255833	255833	CHEMBL1205371	COc1cc2cc3c(O)nc(C(=O)O)nc3nc2cc1OC	0	0	0	0	36.7873	27.6261	18.0094
256403	256403	CHEMBL3192738	COc1ccccc1/C=C/C=c1\sc2nc(=O)c(Cc3ccccc3)nn2c1=O	1	0	0	0	46.3839	38.0344	37.8111
256481	256481	CHEMBL41444	COc1cccc2c1CC[C@H]1CN(CCn3c(=O)[nH]c4c(sc5ccc(Cl)cc54)c3=O)C[C@@H]21	0	0	0	0	40.4925	12.7947	18.0786
256769	256769	CHEMBL1385491	COc1ccc(NC(=O)CSc2nc3[nH]c(=O)[nH]c(=O)c3s2)cc1OC	0	0	0	0	34.5295	27.9511	25.5436
256810	256810	CHEMBL4117642	CC(C)(C)[C@H](N)C(=O)Oc1ccccc1C(=O)Nc1ncc(Cl)s1	0	0	0	0	41.0624	12.5395	18.3806
256880	256880	CHEMBL3438968	COc1ccc2nnc(CCCC(=O)NCc3ccccc3)n2n1	0	0	0	0	51.6804	36.0782	30.6823
256922	256922	CHEMBL440418	Cn1c(=O)c2[nH]c(-c3ccc(OCC(=O)N4CCN(c5nc6cc(Cl)ccc6s5)CC4)cc3)cc2n(C)c1=O	0	0	0	0	51.2905	16.4309	21.878
256928	256928	CHEMBL3557239	COCC(=O)N1C[C@H]2CN(Cc3csc(C)n3)C(=O)[C@H]2C1	0	0	0	0	10.1308	1.20448	15.6304
257031	257031	CHEMBL13903	COc1ccccc1N1CCN(CCn2c(=O)[nH]c3sc(-c4ccccc4)cc3c2=O)CC1	0	0	0	0	39.8841	12.2997	20.2711
257166	257166	CHEMBL3499748	Cc1nc(CN2C[C@@H]3COC[C@]3(COCC(=O)N(C)C)C2)cs1.O=C(O)C(F)(F)F	0	0	0	0	12.8857	1.66184	16.9503
257331	257331	CHEMBL321167	N=C(N)NCCCC(NC(=O)[C@@H]1CC[C@H]2CN(C(=O)COc3ccccc3)CC(=O)N21)C(=O)c1nccs1	1	0	0	0	34.7699	10.0022	18.9947
257669	257669	CHEMBL430512	O=C(NCCCOc1ccc2[nH]c3nc(O)nc-3cc2c1)N1CCN(Cc2cccs2)CC1	0	0	0	0	34.2878	10.2514	19.4392
257951	257951	CHEMBL1564898	Cc1cn2c(=O)cc(COc3cccc(NC(=O)c4ccccc4C)c3)nc2s1	0	0	0	0	34.5179	28.4426	23.1425
258005	258005	CHEMBL47787	COc1cc(-c2nn([C@H]3CC[C@H](N4CCN(C)CC4)CC3)c3ncnc(N)c23)ccc1NC(=O)OCc1ccccc1	0	0	3	0	32.6179	13.7351	20.0444
258082	258082	CHEMBL2336762	COc1cc2nc(Nc3ccc(S(C)(=O)=O)cc3)nc(OCC3CCN(C(=O)OC(C)(C)C)CC3)c2cc1OC	0	0	0	4	15.3988	12.4009	15.7355
258089	258089	CHEMBL2336761	COc1cc2nc(OC3CCN(C(=O)OC(C)(C)C)CC3)nc(Nc3ccc(S(C)(=O)=O)cc3)c2cc1OC	0	0	0	4	15.6867	12.7825	15.7186
258652	258652	CHEMBL3343942	CCOC(=O)C1=C(c2ccccc2)N=c2s/c(=C\c3ccc(OCC(=O)O)c(OC)c3)c(=O)n2C1c1ccc(Cl)cc1	0	0	0	0	37.9706	35.3669	21.2036
259216	259216	CHEMBL563002	COc1ccc(C(=O)c2sc(Nc3ccc(Cl)cc3)nc2N)cc1	0	0	0	0	29.6632	22.5088	17.8776
259425	259425	CHEMBL3408969	CCN(CC)C(=O)Cc1c(-c2ccc(OCc3ccc(F)cc3)cc2)nn2c(C)cc(C)nc12	0	0	0	0	51.155	35.4008	38.4676
259482	259482	CHEMBL3719447	COc1cc(OCc2csc(C3(N)CCOCC3)n2)c2cc(-c3cn4nc(OC)sc4n3)oc2c1	0	0	0	0	35.3952	10.7842	18.1199
259770	259770	CHEMBL547627	COc1ccccc1-c1ccc2nnc(SCC(=O)Nc3ccc4c(c3)OCCO4)n2n1	0	0	0	0	48.8405	38.3491	31.8837
259829	259829	CHEMBL1419420	COc1ccc(CCNC(=O)CSc2nc(O)cc(O)n2)cc1OC	0	0	0	0	34.5873	26.7342	25.3202
259930	259930	CHEMBL45039	CCCOc1ccc(-c2nc(C)cs2)cc1-c1nc2c(c(C)nn2C)c(=O)[nH]1	0	0	0	0	48.3229	39.9661	29.7055
259977	259977	CHEMBL1314353	Cc1cc(C)cc(Oc2nc3ccccn3c(=O)c2/C=C(\C#N)c2nc3ccccc3s2)c1	0	0	0	0	32.7131	26.6291	28.5968
260447	260447	CHEMBL3323303	COc1ccc(C2SCC(=O)N2n2c(Cc3ccccc3Nc3c(Cl)cccc3Cl)n[nH]c2=S)cc1	0	0	0	0	39.2394	12.7333	17.4154
260524	260524	CHEMBL3580762	Cc1cn(-c2ccc3n(c2=O)CCN(CCOc2ccccc2-c2csc(C)n2)C3=O)cn1	1	0	0	0	35.4832	30.4091	31.8818
260681	260681	CHEMBL1909906	O=C(O)c1cc(-c2ccc(/C=c3\sc4nc(=O)c(-c5ccccc5)nn4c3=O)o2)ccc1Cl	0	0	0	0	46.0619	39.0736	23.8208
260684	260684	CHEMBL592456	COc1cc(/C=C2\S/C(=N\c3nc(C45CC6CC(CC(C6)C4)C5)cs3)NC2=O)ccc1O	0	0	0	0	54.0643	16.3165	27.62
260749	260749	CHEMBL1906852	COc1ccc(CN2C(=O)C(C)Nc3ncnc(N4CCc5ccccc5C4)c32)cc1	0	0	0	0	32.5795	21.8793	22.0656
261125	261125	CHEMBL3303429	CC(=O)/N=c1\sccn1CC(O)c1ccc2ccccc2c1	0	0	0	0	36.0387	34.9143	14.4759
261384	261384	CHEMBL1612018	C=CCn1c(CSc2nc3ccccc3s2)nnc1SCC(=O)NCc1ccco1	0	0	0	0	47.0033	38.766	27.3995
261483	261483	CHEMBL3554509	COCCN1C(=O)CC[C@]12CC[C@@H](NCc1nccs1)CC2	0	0	0	0	10.2234	2.58734	4.06769
261640	261640	CHEMBL4302686	C[N+](C)(C)CCNC(=O)CCc1cnc(N2CCC(c3nc(COc4ccc(-n5cnnn5)cc4)cs3)CC2)nc1	0	0	0	0	34.0132	10.2453	19.1568
261693	261693	CHEMBL1829068	N#CC1=C(NC(=O)CCl)Oc2nc(Nc3ccc(S(N)(=O)=O)cc3)sc2C1c1ccc(Cl)cc1	0	0	0	0	24.5461	19.147	15.6251
261778	261778	CHEMBL243122	COc1ccc(Br)c(C(=O)NNc2nc(-c3ccc(O)c(O)c3)cs2)c1	0	0	0	0	40.7704	36.3659	29.4883
262602	262602	CHEMBL326335	CS(=O)(=O)c1ccc(-n2cnc(Cl)c2-c2ccc3c(c2)OCO3)cc1	0	0	0	0	27.5051	24.1117	29.4774
262901	262901	CHEMBL3394136	CCOC(=O)c1sc2ccc(NCc3nc[nH]c3C)cc2c1NC(=O)c1cc(OC)c(OC)c(OC)c1	0	0	0	0	26.9896	19.9853	22.0471
263244	263244	CHEMBL1897445	COc1ccc(OC)c(NC(=O)CSc2nc(=O)n(CCN3CCOCC3)c3c2CCCC3)c1	0	0	0	0	36.8281	11.5072	20.3843
263399	263399	CHEMBL2019116	COc1cc(N2CCC(F)(F)CC2)ccc1-c1nc2snc(C3CCCCC3)c2c(=O)[nH]1	0	0	0	0	56.443	18.0506	26.3153
263636	263636	CHEMBL406940	COc1ccc(S(=O)(=O)N2CCN(CC(=O)NC(CCCN=C(N)N)C(=O)c3nccs3)C(=O)C2)cc1	1	0	0	0	15.8687	11.8256	14.6299
263692	263692	CHEMBL1257947	CCCCSc1nnc2c(n1)O[C@@H](c1cccc(C)n1)N(C(C)=O)c1ccccc1-2	0	0	0	0	51.9414	38.7255	39.6295
264000	264000	CHEMBL3403361	CCn1c(NC(C)C)nc2c(-c3ccnc(OC)c3)csc2c1=O	0	0	0	0	42.2997	13.1097	21.3504
264015	264015	CHEMBL3500021	Cc1ccc(CN2CCc3ncnc(OC(C)C)c3CC2)s1.O=C(O)C(F)(F)F	0	0	0	0	43.5393	12.8369	26.6559
264907	264907	CHEMBL1404790	COc1ccc(-c2csc(NC(=O)Nc3ccccc3)n2)cc1	0	0	0	0	34.1222	31.6676	24.9862
264952	264952	CHEMBL3990509	CC1=CC(=O)N(Nc2nc(-c3cccs3)nc3sc(-c4ccc(OCCNCCO)cc4)c(C)c23)C1=O	0	0	0	0	30.8694	18.6125	20.7165
265317	265317	CHEMBL1626342	COc1ccc(-n2c(=S)[nH]c3c(sc(=S)n3-c3ccccc3)c2=O)c(OC)c1	0	0	0	0	32.9256	26.6932	23.7739
265639	265639	CHEMBL1179035	CCCn1c(=O)c2nc(-c3ccc(OCC(=O)NCCNC(=O)C(N)CCCCNC(=O)OCc4ccccc4)cc3)[nH]c2n(CCC)c1=S	0	0	0	0	25.3272	16.3218	18.3256
265722	265722	CHEMBL2096706	N[C@@H](C(=O)N1CCC[C@H]1C(=O)c1nccs1)C1CCCCC1	0	0	0	0	9.80177	2.5494	4.01613
265751	265751	CHEMBL1178733	CC(=O)Oc1ccc2c(c1)CCc1sc(N)nc1-2	0	0	0	0	29.6562	22.2324	21.2575
265806	265806	CHEMBL1184194	CCCCCCCCCCCCCCCC1CCC(COCCCCCC[n+]2ccsc2)O1	0	0	0	0	8.70131	0.576938	21.3002
265915	265915	CHEMBL1276983	CCNC(=O)Nc1cccc(N(C)c2ncnc3cc(OC)c(OC)cc23)c1	0	0	0	0	37.5105	27.8371	26.4587
265928	265928	CHEMBL441337	COC(=O)C1=C(C)NC(C)=C(C(=O)OC)C1c1c(-c2c(OC)ccc(OC)c2[N+](=O)[O-])nc2sc(Cl)cn12	0	0	0	0	37.0334	18.3808	18.321
265982	265982	CHEMBL1488661	COc1ccc(-c2cc(C(F)(F)F)nc(S(=O)(=O)CCC(=O)N3CCOCC3)n2)cc1	0	0	0	0	17.168	15.1985	18.3545
266011	266011	CHEMBL1271857	COc1cc(-c2ncc(C(=O)c3ccc(F)cc3)n2S(=O)(=O)c2ccccc2)cc(OC)c1OC	0	0	0	0	21.8603	20.1404	21.1837
266012	266012	CHEMBL1519802	CCc1ccc2n(-c3ccc(OC)cc3)c([S-])c(C(=O)Nc3cc(C)cc(C)c3)[n+]2c1	0	0	0	0	33.8504	22.1008	22.2085
266034	266034	CHEMBL1232443	NS(=O)(=O)c1cc(C(=O)CSc2nc3cc4c(cc3[nH]2)OCCO4)ccc1Cl	0	0	0	0	27.0356	24.7021	18.0544
266192	266192	CHEMBL2281931	COc1ccc(-c2nc(Nc3ccc(S(N)(=O)=O)cc3)nc(N3N=C(C)CC3=O)c2C#N)cc1OC	0	0	0	0	24.6235	19.0646	20.0004
266289	266289	CHEMBL515417	CNC(=O)/C=C(\c1ccc(OC)cc1)c1ccc2nc(NCC(=O)NC)c(-c3ccc(F)cc3)n2n1	0	0	0	0	33.2176	20.713	21.678
266447	266447	CHEMBL1720884	CCC(C)NC(=O)CSc1nnc(-c2ccc(OC)c(OC)c2)c(-c2ccc(OC)c(OC)c2)n1	0	0	0	0	51.6193	39.294	33.3156
266507	266507	CHEMBL1897307	Clc1ccccc1-c1cnc2sc(NCc3ccc4c(c3)OCO4)nn12	0	0	0	0	34.6248	18.9478	40.4928
266603	266603	CHEMBL313440	CCc1nc(N)nc(N)c1-c1ccc(Cl)c(/N=N/N(CCOC(C)=O)Cc2ccc(OC)cc2)c1	0	0	0	0	32.7326	20.5826	17.6873
266718	266718	CHEMBL3120215	COc1cccc2cc(-c3nc([C@H]4CC[C@H](C(=O)O)CC4)n4ncnc(N)c34)[nH]c12	0	0	0	0	35.9654	15.6757	15.1654
266730	266730	CHEMBL3394681	Cc1nc(-n2cnn(Cc3ccc(F)cc3)c2=O)sc1C(=O)NCc1ncco1	0	0	0	0	46.5853	39.0604	27.3882
266752	266752	CHEMBL1873475	C=CC(=O)N1CCC[C@@H](n2nc(-c3ccc(Oc4ccccc4)cc3)c3c(N)ncnc32)C1	0	2	3	0	36.8783	15.5459	21.3896
267349	267349	CHEMBL2016705	Cc1nc(N2CCN(S(C)(=O)=O)CC2)nc2ccc(NC(=O)COc3ccc(Cl)cc3)cc12	0	0	0	4	16.5804	15.167	12.8241
267437	267437	CHEMBL1257237	CSc1nnc2c(n1)O[C@@H](c1ccc(OC(C)=O)c(Br)c1)N(C(C)=O)c1ccccc1-2	0	0	0	0	51.0033	37.9036	39.3505
267457	267457	CHEMBL1258858	CCCC(=O)N1c2ccccc2-c2nnc(SC)nc2O[C@H]1c1cccs1	0	0	0	0	49.1696	39.244	38.9011
267461	267461	CHEMBL1257364	CCSc1nnc2c(n1)O[C@@H](c1cccc(C)c1OC(C)=O)N(C(C)=O)c1ccccc1-2	0	0	0	0	51.2949	38.0944	39.3333
267717	267717	CHEMBL1720283	CC[C@H](C)[C@@H](C(=O)N1CCCC1c1nccs1)N(C)C(=O)[C@H](CC(C)C)N(C)C(=O)[C@H](Cc1ccc(OC)cc1)N(C)C(=O)/C=C(\C)OC	0	0	0	0	50.9775	14.5847	30.4966
267796	267796	CHEMBL1358685	CC(Oc1ccccc1)C(=O)Nc1ccc(OCc2cc(=O)n3ccsc3n2)cc1	0	0	0	0	34.8115	28.5746	24.326
267851	267851	CHEMBL1566915	COc1c(C(=O)Nc2nccs2)ccc2ccccc12	0	0	0	0	33.6789	32.1716	24.2404
267858	267858	CHEMBL3198927	C=CCOc1ccccc1/C=c1\sc2nc(=O)c(C)nn2c1=O	1	0	0	0	47.5321	39.123	38.2345
268064	268064	CHEMBL4203454	COc1ccc(Cc2nc(N)n(CC(=O)Nc3ccc(C)cc3)c2-c2ccccc2Br)cc1	0	0	0	0	33.8674	21.6795	22.3064
268239	268239	CHEMBL1689249	CCOC(=O)C1=C(c2ccccc2)N=c2s/c(=C\c3ccc(O)cc3)c(=O)n2C1c1ccc(OC)cc1	0	0	0	0	36.9492	34.2784	25.5729
268242	268242	CHEMBL272135	COC(=O)C[C@@H]1C(=O)N(CC(=O)N[C@@H](CCCNC(=N)N)C(=O)c2nccs2)CCN1S(=O)(=O)Cc1ccccc1	1	0	0	0	15.6562	12.2808	6.0049
268417	268417	CHEMBL3199687	Cc1ccc(Cn2ccs/c2=N\C(=O)COC(=O)c2ccc(O)cc2O)cc1	1	0	0	0	37.4771	35.3669	18.8868
268478	268478	CHEMBL2046730	COCCOc1cc2ncnc(Sc3nnc(NC(=O)Nc4cccc(Cl)c4)s3)c2cc1OCCOC	0	0	0	0	47.4786	38.7601	25.6724
268599	268599	CHEMBL2180783	CN(C(=O)COc1ccc(-c2c(-c3ccc(Cl)cc3)nc3sccn23)cc1)c1ccccn1	0	0	0	0	34.1635	29.2412	33.8073
268604	268604	CHEMBL4217166	CCCc1nn(C)c2c(=O)[nH]c(-c3cc(C(=O)c4ccc(C(=O)NO)s4)ccc3OCC)nc12	0	0	0	0	46.4661	38.421	28.7684
268738	268738	CHEMBL3753635	COc1ccc(/C=N/n2cnc3sc4c(c3c2=O)CCN(Cc2ccccc2)C4)cc1	0	0	0	0	33.6755	19.7951	26.864
269114	269114	CHEMBL1995040	COc1cc(/C=N/n2cnc3scc(-c4cccs4)c3c2=O)cc(OC)c1OC	0	0	0	0	47.9248	38.9618	36.4829
269273	269273	CHEMBL514968	COc1ccc2c(c1)ncn2-c1cc(OCc2ccccc2C(F)(F)F)c(C(N)=O)s1	0	0	3	0	33.9981	29.919	23.524
269281	269281	CHEMBL474029	COc1cc2ncn(-c3cc(OCc4ccccc4C#N)c(C(N)=O)s3)c2cc1OC	0	0	3	0	33.8018	29.4775	26.2589
269910	269910	CHEMBL2263398	COC(=O)N1CCN(c2nc3nc(OC)ccc3cc2-c2ccccc2)CC1	0	0	0	0	52.9777	18.6209	32.7112
269925	269925	CHEMBL3490526	N#CC1(C(=O)N2CCCN(Cc3cscn3)CC2)CCCCC1	0	0	0	0	11.2902	1.28781	17.3051
270105	270105	CHEMBL1773661	COc1cc(N2CCN(S(=O)(=O)c3ccc(OC(F)(F)F)cc3)C(C(=O)NCc3ccc(OC(F)(F)F)cc3)C2)nc(OC)n1	0	0	0	0	17.303	15.3825	15.8754
270139	270139	CHEMBL1766375	COc1ccc(C2C3=C(COC3=O)Nc3ccc4nc(S)[nH]c4c32)cc1O	0	0	0	0	34.2453	22.1029	24.0394
270446	270446	CHEMBL43205	CCCOc1ccc(-c2csc(-c3ccccc3)n2)cc1-c1nc2c(c(C)nn2C)c(=O)[nH]1	0	0	0	0	47.5354	39.3609	29.3764
270692	270692	CHEMBL3702265	Cc1c(C(=O)NCCO)sc2ncnc(Nc3cccnc3OCC(F)F)c12	0	0	3	0	27.4911	20.8724	19.0436
270700	270700	CHEMBL3702269	CCNC(=O)C(C)Oc1cc(F)ccc1Nc1ncnc2sc(C(N)=O)c(C)c12	0	0	3	0	27.8741	21.3343	19.3406
270708	270708	CHEMBL3702273	COC(=O)c1sc2ncnc(Nc3cccnc3OCC3(CC#N)CC3)c2c1C	0	0	3	0	41.2541	12.8073	20.4401
271071	271071	CHEMBL483065	CCn1c(=O)[nH]c2nc(-c3ccc(S(=O)(=O)N4CCN(Cc5ccc6c(c5)OCO6)CC4)cc3)[nH]c2c1=O	0	0	0	0	15.1397	11.7209	15.5598
271421	271421	CHEMBL3934846	COCCOc1ccc2[nH]nc(-c3cc(N4CCNC(=O)C4)ncn3)c2c1	0	0	3	0	50.5891	36.0627	30.9515
271574	271574	CHEMBL1320986	COc1ccc(-c2cc(C(F)(F)F)nc(SCC(=O)N3CCC(C)CC3)n2)cc1	0	0	0	0	55.1696	17.354	32.7272
271779	271779	CHEMBL3126926	COc1ccc2c(c1)NC(=O)CN2c1nc(C)nc2ccccc12	0	0	0	0	38.0953	27.4652	25.2687
271918	271918	CHEMBL365784	COc1ccc(NC(=O)Nc2ccc(-c3c(C)sc4ncnc(N)c34)cc2)cc1	0	0	3	0	27.4018	20.6397	20.0997
272050	272050	CHEMBL542391	COc1ccccc1N1CCN(c2ccc3c(=O)c(C(=O)O)cn(-c4nccs4)c3n2)CC1.Cl	0	0	0	0	54.2779	17.8152	20.1892
272086	272086	CHEMBL1800155	COCCN(C)Cc1c(-c2ccc(NC(=O)NOC)cc2)sc2c1c(=O)n(-c1ccc(OC)cc1)c(=O)n2Cc1c(F)cccc1F	0	0	0	0	26.9673	20.1969	19.3582
272319	272319	CHEMBL125171	CCCCS(=O)(=O)CCCOc1cc2ncnc(N3CCN(C(=O)Nc4ccc(OC(C)C)cc4)CC3)c2cc1OC	0	0	3	0	15.8475	14.3493	16.2647
272472	272472	CHEMBL1829059	NC(=O)C1=C(N)Oc2nc(Nc3ccc(S(N)(=O)=O)cc3)sc2C1c1ccc(Cl)cc1	0	0	0	0	24.6065	19.1328	15.8741
272605	272605	CHEMBL549511	COc1ccc(/C=N/c2nc3[nH]nc(C)n3c(=O)c2S(=O)(=O)NN2C(=O)C(CN3CCN(C)CC3)SC2c2cccs2)cc1	0	0	0	0	15.1686	11.6636	14.3965
273366	273366	CHEMBL571120	COc1ccc(C2CC(Nc3nc4ccc(Cl)cc4s3)=NN2C(C)=O)cc1	0	0	0	0	36.2896	21.8689	18.8301
273445	273445	CHEMBL3805618	CCOC(C)Oc1cc2ncnc(Nc3ccc(C)c(C#N)c3)c2c2c1OCCO2	0	0	3	0	32.6381	20.9697	34.3879
273520	273520	CHEMBL3752248	O=C(Nc1nccs1)Nc1cc(-c2cncnc2)ccc1OC(F)(F)F	0	0	3	0	33.5417	27.8862	24.0692
273527	273527	CHEMBL3665710	COc1ccc([C@H](C)NC(=O)COc2cc(C(F)(F)F)c3c(C4CC4)nn(C)c3n2)cc1	0	0	0	0	50.7603	22.6419	27.1253
273652	273652	CHEMBL1491824	CCOc1ccc(-n2c(=O)c3c4c(sc3n(CC(=O)NCC3CCCO3)c2=O)CCCC4)cc1	0	0	0	0	54.1457	17.2059	24.7759
273653	273653	CHEMBL3763789	COc1cc(/C=N/NC(=O)c2c(C)nc3sccn23)cc(OC)c1OC	0	0	0	0	47.3037	39.358	32.6636
273733	273733	CHEMBL3785299	COc1cc2c(cc1Nc1ncc(Cl)c(Nc3ccccc3S(=O)(=O)C(C)C)n1)CCC(NC(=O)CN(C)C)C2(C)C	0	0	3	0	13.7376	11.0923	11.1715
273842	273842	CHEMBL1420418	COc1ccccc1Nc1nc(Cl)c(C=O)s1	1	0	0	0	30.5303	23.2073	18.2266
274058	274058	CHEMBL3752435	CC(C)(C)CCC1([C@H](O)/C=C/[C@H]2COC(=O)N2CCSc2nc(C(=O)O)cs2)CCC1	0	0	0	0	6.28855	1.79035	0.901388
274166	274166	CHEMBL3647517	Nc1ncnc2c1c(-c1ccc(Oc3ccccc3)cc1)nn2C1CC2(C1)CN(C(=O)C1CO1)C2	0	0	3	0	33.9885	14.1963	20.47
274355	274355	CHEMBL4125987	Cc1ccc2c(c1)C=Cc1cc(C)ccc1C2c1cn(Cc2cc(C(=O)NCCOCCOCCNC(=O)CCCCCNC(=O)COc3ccc(/C=C/C4=[N+]5C(C=C4)Cc4ccc(-c6cccs6)n4[B-]5(F)F)cc3)cc(C(=O)Nc3nnn[nH]3)c2)c(=O)[nH]c1=S	0	0	0	0	27.9779	17.2853	18.5344
274655	274655	CHEMBL3501865	Cc1nc(CN2C[C@@H]3CN(C(=O)C4(C#N)CC4)C[C@@H]3C2=O)cs1.O=C(O)C(F)(F)F	0	0	0	0	12.1686	1.54727	17.4499
274659	274659	CHEMBL3771226	Cc1ccc(S(=O)(=O)Nc2cc3c(cc2Oc2ccccc2)n(C)c(=O)n3C)cc1	0	0	0	0	21.9372	20.5056	18.5639
275120	275120	CHEMBL1258058	CCSc1nnc2c(n1)O[C@@H](c1ccccc1F)N(C(C)=O)c1ccccc1-2	0	0	0	0	52.0612	38.7605	39.7825
275127	275127	CHEMBL1258060	C=CCSc1nnc2c(n1)O[C@@H](c1cc(Br)c(OC(C)=O)c(OC)c1)N(C(C)=O)c1ccccc1-2	0	0	0	0	50.9644	37.991	37.922
275193	275193	CHEMBL3718346	COc1cc(OCc2csc(C3(c4ccc(Br)cc4)CCOCC3)n2)c2cc(-c3cn4nc(OC)sc4n3)oc2c1	0	0	0	0	47.679	13.9774	30.1449
275201	275201	CHEMBL3717023	COc1cc(OCc2csc(C3(F)CCC(F)(F)CC3)n2)c2cc(-c3cn4nc(OC)sc4n3)oc2c1	0	0	0	0	48.2995	14.131	30.5756
275211	275211	CHEMBL3716787	COc1cc(OCc2nc(-c3ccnc(F)c3)sc2C)c2cc(-c3cn4nc(OC)sc4n3)oc2c1	0	0	0	0	42.298	35.1971	36.1809
275224	275224	CHEMBL3715215	CNC(=O)c1ccc(-c2nc(COc3cc(OC)cc4oc(-c5cn6nc(OC)sc6n5)cc34)c(C)s2)cc1	0	0	0	0	44.8503	37.3005	27.4362
275434	275434	CHEMBL3935735	COc1cc(-c2ccc(F)c(C)c2)c(F)cc1-n1c(=O)ccc2cc(S(=O)(=O)Nc3ncccn3)ccc21	0	0	0	0	23.2937	21.1757	18.2992
275451	275451	CHEMBL3894624	COc1cc(Br)c(F)cc1-n1c(=O)ccc2cc(S(=O)(=O)Nc3ccnc(C)n3)ccc21	0	0	0	0	23.0929	21.0336	18.1325
275452	275452	CHEMBL4094435	O=C(OCC(F)(F)F)C1=C(CN2CCOC[C@H]2C(=O)O)NC(c2nccs2)=N[C@H]1c1ccc(F)cc1Cl	0	0	0	0	41.5203	13.4123	12.765
275458	275458	CHEMBL4082523	CCOC(=O)C1=C(CN2CCOC[C@H]2C(=O)O)NC(c2nccs2)=N[C@H]1c1ccc(C)cc1Cl	0	0	0	0	41.5066	13.404	12.7602
275560	275560	CHEMBL3905414	CNC(=O)c1ccc(-n2cnc3c(NCC4CCOCC4)cc(Oc4ccc(OC)cc4SC)cc32)cc1C	0	0	3	0	37.8477	11.9213	19.5922
275565	275565	CHEMBL1242578	CC(=O)Oc1ccccc1C(=O)Nc1ncc(S(C)(=O)=O)s1	0	0	0	0	30.5066	29.6483	22.3799
275731	275731	CHEMBL1396455	COc1ccccc1-c1cc(C(F)(F)F)nc(S(=O)(=O)CCCC(=O)Nc2cc(C)ccc2O)n1	0	0	0	0	26.2679	22.6249	20.358
275893	275893	CHEMBL3917698	CN(C)C/C=C/C(=O)N1CCC(n2nc(-c3ccc(Oc4ccccc4)cc3)c3c(N)ncnc32)CC1	0	0	3	0	34.1898	14.4819	20.2717
276022	276022	CHEMBL1570493	COc1ccc(-c2nc(SCC(=O)NC3CCCC3)c(-c3ccc(OC)cc3)[nH]2)cc1	0	0	0	0	55.3503	17.9957	26.4914
276111	276111	CHEMBL1893497	COc1cccc(-c2cc3nc(NCCN4CCCC4)n(C)c(=O)c3s2)c1	0	0	0	0	39.4065	12.0666	20.1697
276295	276295	CHEMBL3557670	Cc1nc(CN2C[C@@H]3CN(C(=O)C4(C#N)CC4)C[C@@H]3C2=O)cs1	0	0	0	0	10.2486	1.20094	16.047
276525	276525	CHEMBL3828295	Cc1nc(-c2ccc(-c3ccco3)cc2)sc1-c1ccnc(N)n1	0	0	0	0	28.0094	21.2107	18.6261
276647	276647	CHEMBL3970662	CCOc1ccccc1C(C)NC(=O)c1nn2c(C)ncc2s1	0	0	3	0	47.7889	39.517	30.576
276752	276752	CHEMBL3945137	CC[C@H](C)[C@H](NC(=O)[C@@]1(C)CCCN1C)C(=O)N(C)[C@H](C[C@@H](OC(C)=O)c1nc(C(=O)NCCc2cscn2)cs1)C(C)C	0	0	0	0	11.7228	3.24444	3.40675
276771	276771	CHEMBL3823255	COc1cc(-c2nn(CCN3CCC(N(C)C)CC3)c3ncnc(N)c23)ccc1NC(=O)CC(C)(C)C	0	0	3	0	33.8336	14.2322	20.3752
276795	276795	CHEMBL4100003	CC1=C(c2nc(-c3ccc(C#N)cc3)cs2)C(c2ccc(OCc3ccccc3)cc2)NC(=O)N1	0	0	0	0	36.372	33.677	26.0798
276802	276802	CHEMBL1478012	COc1ccc(-c2cc(C(F)(F)F)nc(SCCC(=O)Nc3cccc(O)c3)n2)cc1	0	0	0	0	35.5356	27.7933	24.4506
277021	277021	CHEMBL1991491	COc1ccc(CN2C(=O)C(C)Nc3ncnc(N4CCOCC4)c32)cc1.O=C(O)C(F)(F)F	0	0	0	0	39.8238	14.0451	21.6802
277042	277042	CHEMBL3741458	COCCOc1ccc(/C=C/C(=O)Nc2nc(-c3c(C)cc(C)cc3C)cs2)cc1	0	0	0	0	35.697	33.0091	25.837
277073	277073	CHEMBL3733078	Cc1nc(NC(C)c2cccc(OCC(=O)C3CC3)c2)cc(-c2ccc3ncsc3c2)n1	0	0	0	0	38.2349	11.5147	20.4894
277096	277096	CHEMBL3597849	CSc1cccc(Nc2nc(-c3cc(OC(C)=O)c(OC(C)=O)c(OC(C)=O)c3)cs2)c1	0	0	0	0	29.0008	21.5386	22.5252
277108	277108	CHEMBL327772	CCCOc1ccc(S(=O)(=O)N2CCN(C(=O)N(C)C)CC2)cc1-c1nc2c(=O)n(C)c(=O)n(CC(C)C)c2[nH]1	0	0	0	0	16.6038	15.4816	15.6606
277137	277137	CHEMBL3732835	Cc1nc(NC(C)c2cccc(OCC(=O)N3CCCCC3)c2)cc(-c2ccc3ncsc3c2)n1	0	0	0	0	37.6005	11.3186	20.6481
277146	277146	CHEMBL3926864	COC(=O)N[C@H](C(=O)N1CCC[C@H]1c1ncc(-c2cc(F)c3c(c2)OC(c2ncc(C4CC4)s2)n2c-3cc3cc(-c4cnc([C@@H]5CCCN5C(=O)[C@@H](NC(=O)OC)C(C)C)[nH]4)ccc32)[nH]1)C(C)C	0	0	0	0	23.0103	7.60508	15.6313
277150	277150	CHEMBL3926561	COC(=O)N[C@H](C(=O)N1CCC[C@H]1c1ncc(-c2cc(F)c3c(c2)OC(c2cnc(C4CC4)s2)n2c-3cc3cc(-c4cnc([C@@H]5C[C@H]6C[C@H]6N5C(=O)[C@@H](NC(=O)OC)C(C)C)[nH]4)ccc32)[nH]1)C(C)C	0	0	0	0	23.0157	7.56382	15.8002
277192	277192	CHEMBL3941568	CN(C1COC1)C(C)(C)/C=C(\C#N)C(=O)N1CCC[C@H](n2nc(-c3ccc(Oc4ccccc4)cc3F)c3c(N)ncnc32)C1	0	0	3	0	32.0981	13.4782	19.4736
277291	277291	CHEMBL3675269	COc1cccc(-c2cc(F)ccc2[C@H]2Cc3nc(N)nc(C)c3C(NOCC(=O)N(C)C)=N2)n1	0	0	0	0	30.8644	20.807	21.612
277418	277418	CHEMBL3622659	COCCOc1cc2ncnc(Nc3ccc(F)c(Cl)c3)c2cc1NC(=O)/C=C/CN1CC[S+]([O-])CC1	0	0	3	0	36.3451	11.8308	16.5776
277719	277719	CHEMBL3740386	N=C(N)NCCC[C@H](NC(=O)c1nccs1)C(=O)N[C@@H](CCCCN)C(=O)N[C@@H](C(N)=O)c1ccc(OCc2c(Cl)cccc2Cl)cc1	0	0	0	0	25.6826	18.1318	15.8042
277925	277925	CHEMBL2431379	COc1ccc2ccccc2c1/C=N/NC(=O)CCn1c(C(F)(F)F)nc2ccccc21	0	0	0	0	49.5455	34.5371	29.6985
278355	278355	CHEMBL278944	COc1ccccc1Sc1c(C)c(=O)[nH]c(=O)n1COCCO	0	0	0	0	34.7456	26.7454	24.0604
278357	278357	CHEMBL3823161	CCc1cc(CC)n2nc(-c3ccc(OC)cc3)c(CC(=O)N(C(C)C)C(C)C)c2n1	0	0	0	0	54.2963	23.6216	35.2967
278369	278369	CHEMBL3715913	COc1cc(OCc2csc(C3(O)CC(C)OC(C)C3)n2)c2cc(-c3cn4nc([C@H](C)F)sc4n3)oc2c1	0	0	0	0	50.9349	16.1787	23.1084
278373	278373	CHEMBL3716290	COc1nn2cc(-c3cc4c(OCc5csc(-c6ccc(C(=O)N7CCCC7)cc6)n5)cc(F)cc4o3)nc2s1	0	0	0	0	46.8617	13.6816	29.6803
278467	278467	CHEMBL1410152	CCC(=O)N=C(N)Nc1nc(C)c2cc(OC)ccc2n1	0	0	0	0	32.8152	22.9741	22.5926
278522	278522	CHEMBL3939875	COc1cc2c(Oc3ccc(NC(=O)c4nn(-c5ccccc5Cl)c(=O)n4C4CC4)cc3F)ccnc2cc1OCCCN1CCC(C)CC1	0	0	0	0	28.3994	11.5338	21.4839
278566	278566	CHEMBL3793562	CCN(CC)c1cc(OCc2cc(F)c(Oc3ccc(Cl)c(C(F)(F)F)c3)c(F)c2)nc(=O)n1C	0	0	0	0	36.2557	26.6718	33.7932
278574	278574	CHEMBL3793007	Cn1c(N2CCSCC2)cc(OCc2cc(F)c(Oc3ccc(Cl)c(C(F)(F)F)c3)c(F)c2)nc1=O	0	0	0	0	52.9439	16.0171	35.4214
278667	278667	CHEMBL1470409	Cc1cc(C)c2c(CC(=O)Nc3nccs3)coc2c1	0	0	0	0	34.4172	32.9787	23.6469
278807	278807	CHEMBL4164516	COc1ccc(Cn2cnc3c(Cl)nc(Cl)nc32)cc1OC	0	0	0	0	40.2425	27.4524	36.093
278897	278897	CHEMBL3459834	COCCOCC(C)NC(=O)COc1nn(C)c2nc(C)cc(C)c12	0	0	0	0	51.9331	36.3058	31.7749
278996	278996	CHEMBL1444782	O=C(COC(=O)Cc1cn2ccsc2n1)NCc1ccc2c(c1)OCO2	0	0	0	0	34.8858	30.4984	26.5635
279050	279050	CHEMBL3946418	COC(=O)N[C@H](C(=O)N1CCC[C@H]1c1ncc(-c2ccc3c(c2)OC(c2ccc(C4CC4)s2)n2c-3cc3cc(-c4cnc([C@@H]5CCCN5C(=O)[C@@H](NC(=O)OC)C(C)C)[nH]4)ccc32)[nH]1)C(C)C	0	0	0	0	22.9684	7.53967	15.5734
279294	279294	CHEMBL1867684	COc1ccc(C(C)(NC(C)=O)c2nc(-c3cncnc3)cs2)cc1	0	0	0	0	33.063	27.3818	23.5116
279305	279305	CHEMBL3981041	CCC(=O)Nc1cc2c(Nc3ccc4c(ccn4S(=O)(=O)c4ccccc4)c3)ncnc2cc1OC	0	0	3	0	25.1561	19.3586	19.1839
279309	279309	CHEMBL3941175	CCC(=O)Nc1cc2c(Nc3ccc(NS(=O)(=O)c4ccccc4)c(F)c3)ncnc2cc1OC	0	0	3	0	25.3142	19.5713	19.3304
279538	279538	CHEMBL3961693	COC(=O)N[C@H](C(=O)N1CCC[C@H]1c1ncc(-c2cc(F)c3c(c2)OC(c2sccc2C2CC2)n2c-3cc3cc(-c4cnc([C@@H]5CCCN5C(=O)[C@@H](NC(=O)OC)C(C)C)[nH]4)ccc32)[nH]1)C(C)C	0	0	0	0	23.2364	7.6018	15.9265
279617	279617	CHEMBL3770048	Cc1ccc(F)cc1S(=O)(=O)Nc1cc2c(cc1Oc1ccccc1)n(C)c(=O)n2C	0	0	0	0	22.0141	20.5245	18.5673
279681	279681	CHEMBL3678331	O=C(O)C1(Cc2nc3cc(OCc4ccc5ccccc5n4)ccc3n2Cc2ccc(Br)cc2)CCCC1	0	0	0	0	49.697	19.3517	19.7774
279685	279685	CHEMBL3678351	O=C(O)[C@H]1CCCC[C@@H]1c1nc2cc(OCc3ccc4cccc(F)c4n3)ccc2n1Cc1ccc(Br)cc1	0	0	0	0	49.9085	19.4116	19.8097
279740	279740	CHEMBL1493613	CCOc1ccc(Cn2c(SCCCCC#N)nc3c2c(=O)n(C)c(=O)n3C)cc1OCC	0	0	0	0	34.5673	28.6813	29.107
280080	280080	CHEMBL1460429	CCn1c2ccccc2c2cc(NC(=O)CSc3nnc(-c4ccc(OC)c(OC)c4)n3N)ccc21	0	0	0	0	33.0123	19.7047	22.6229
280116	280116	CHEMBL1784058	C=C(C)CNc1ncnc2sc3c(=O)n(-c4ccc(OC)c(F)c4)cnc3c12	0	0	0	0	28.3839	21.8319	20.1392
280755	280755	CHEMBL3902362	Cc1cc(C)c(Oc2nc(NC3CCN(Cc4cccc(C(N)=O)c4)CC3)nc3ccsc23)c(C)c1	0	0	0	0	37.4876	11.4165	19.472
280764	280764	CHEMBL1349859	CCn1cnc2sc(C(=O)Nc3ccc4c(c3)OCO4)c(C)c2c1=O	0	0	0	0	33.3225	26.7285	25.517
280765	280765	CHEMBL3805373	COc1cc(-n2c(/C=C/c3cccs3)nc3ccccc3c2=O)cc(OC)c1OC	0	0	0	0	32.4233	26.4261	26.8075
280789	280789	CHEMBL1403573	Cn1c(SCC(=O)Nc2nccs2)nnc1-c1ccco1	0	0	0	0	47.8136	39.8895	27.8399
280844	280844	CHEMBL1732331	COc1ccc(CCNC(=O)CSc2nc3nc(O)cc(O)c3s2)cc1	0	2	0	0	35.4332	28.7196	24.7577
281194	281194	CHEMBL1773576	CCN(c1nccc(-c2ccc3nc(NC(C)=O)sc3c2)n1)S(=O)(=O)c1ccc(OC)cc1	0	0	3	0	27.3627	25.4404	21.332
281273	281273	CHEMBL3770332	COC(=O)Nc1ccc2c(c1)OCCc1cc(-c3nncn3-c3ccccc3Cl)sc1-2	0	0	0	0	55.196	42.4042	28.5169
281319	281319	CHEMBL2019114	COc1cc(N2CCN(S(C)(=O)=O)CC2)ccc1-c1nc2snc(C3CCCCC3)c2c(=O)[nH]1	0	0	0	0	17.3581	16.0895	15.7942
281475	281475	CHEMBL3974041	COc1cc(-n2cnc3cc(-c4ccc(Cl)cc4)sc3c2=O)ccc1OCC1(O)CCCC1	0	0	0	0	53.5798	17.3073	22.3255
281525	281525	CHEMBL3702271	CCNC(=O)C(C)Oc1cc(F)ccc1Nc1ncnc2sc(C(=O)NCCCN(C)C)c(C)c12	0	0	3	0	26.6242	19.8351	18.6124
281663	281663	CHEMBL3678328	CC(C)(Cc1nc2cc(OCc3ccc4ccccc4n3)ccc2n1Cc1ccc(Br)cc1)C(=O)O	0	0	0	0	49.8764	19.442	19.8193
281802	281802	CHEMBL1779219	O=C1COc2c(Cl)cc(Cl)cc2N1Cc1nnc(C2CC2c2ccccc2)n1CCC(F)(F)F	0	0	0	0	52.7522	23.1776	38.376
281817	281817	CHEMBL1537590	COc1cccc(CNC(=O)Cn2c(=O)n(CCC(=O)N3CCCCC3)c(=O)c3sccc32)c1	0	0	0	0	53.7938	16.9785	25.2697
281882	281882	CHEMBL3680358	CC(=O)N[C@@H](C)c1ccc(C2CN(c3ncnc(OCC4CC4(F)F)c3F)C2)cc1	0	0	0	0	51.6234	18.2577	25.8752
281919	281919	CHEMBL3823275	CCCCCN(CCCCC)C(=O)Cc1c(-c2ccc(OC)cc2)nn2c(CC)cc(CC)nc12	0	0	0	0	52.2789	35.4808	38.9804
281941	281941	CHEMBL20442	CN(CC(=O)NC(CC1CCNCC1)C(=O)c1nccs1)C(=O)[C@@H](CC1CCCCC1)NCC(=O)O	1	0	0	0	6.31688	1.43881	0.554862
281997	281997	CHEMBL1373913	COc1cc(SC)ccc1C(=O)Nc1nccs1	0	0	0	0	33.2305	31.8513	23.9566
282217	282217	CHEMBL3468026	Cc1csc(CNC(=O)NCC2(c3ccc4c(c3)OCO4)CC2)n1	0	0	0	0	55.0042	16.5428	27.3029
282292	282292	CHEMBL295741	COc1cccc2c1CC[C@H]1CN(CCn3c(=O)[nH]c4c(sc5ccc(Cl)nc54)c3=O)C[C@@H]21	0	0	0	0	39.9774	12.6984	17.793
282326	282326	CHEMBL3884855	COc1cc2c(cc1OC)CN(C(=O)CN1C(=O)S/C(=C\c3nc4ccccc4n3C)C1=O)CC2	0	0	0	0	52.1452	16.2899	30.4028
282411	282411	CHEMBL3794150	Cn1c(C2CC2)nc2ccc(-n3ccc(OCc4csc(C(F)(F)F)c4)cc3=O)cc21	0	0	0	4	54.7454	16.4729	33.4385
282608	282608	CHEMBL3970340	CC(=O)N1CCC[C@H]1C(=O)N[C@@H](CC(C)C)C(=O)N[C@@H](Cc1cncn1CCCCCO/N=C/c1ccc(-c2nc3ccccc3s2)o1)C(=O)N[C@@H](CO)C(=O)N[C@H](C(N)=O)[C@@H](C)OP(=O)(O)O	0	0	0	0	46.4918	14.6612	21.2232
282635	282635	CHEMBL1549821	O=C(COc1ccc(Cl)cc1)NCc1nnc2c3ccccc3c(-c3ccccc3)nn12	0	0	0	0	52.2437	36.7998	26.6068
282656	282656	CHEMBL3940328	COc1ccc(-c2cc3c(NN4C(=O)C=C(C)C4=O)nc(-c4cccs4)nc3s2)cc1	0	0	3	0	48.6363	39.915	30.334
282660	282660	CHEMBL3921068	CC1=CC(=O)N(Nc2nc(-c3cccs3)nc3sc(-c4ccc(OCCNCCC#N)cc4)c(C)c23)C1=O.Cl	0	0	3	0	31.3409	18.8736	20.9252
282670	282670	CHEMBL3954358	CC1=CC(=O)N(Nc2nc(-c3cccs3)nc3sc(-c4ccc(OC5CCNC5)cc4)c(C)c23)C1=O.Cl	0	0	3	0	36.6889	11.1276	19.8704
282744	282744	CHEMBL3448270	Cc1cc(C)nc(N2CC=C[C@H]2C(=O)NCc2ccc3c(c2)OCO3)n1	0	0	0	0	37.1996	27.4961	26.432
283003	283003	CHEMBL4076341	CC1=C(c2nc(-c3ccc(C#N)cc3)cs2)C(c2cccc(OC(F)(F)F)c2)NC(=O)N1	0	0	0	0	35.4762	33.1053	25.5474
283106	283106	CHEMBL3932492	COCCNS(=O)(=O)c1cc(-c2c(C)nc3c(NCCNC(C)=O)cc(Cl)nn23)ccc1OC	0	0	0	0	24.8792	19.1292	15.6135
283199	283199	CHEMBL1552629	CCOc1ccc(-n2c(=O)c3c(C)c(C)sc3n(CC(=O)N(CC)Cc3ccccc3)c2=O)cc1	0	0	0	0	34.5153	27.5204	30.0242
283218	283218	CHEMBL535265	COc1ccc2nc(NC(N)=NC(=O)Nc3ccccc3)nc(C)c2c1	0	0	0	0	31.4992	21.8439	21.9138
283948	283948	CHEMBL3805584	C#Cc1cccc(Nc2ncnc3cc(OC(C)COC)c4c(c23)OCCO4)c1	0	0	3	0	32.4263	20.7976	34.6721
284549	284549	CHEMBL3981050	Cn1c(=O)c2c(CC(=O)Nc3nc(-c4cc(F)c(CCC(F)(F)F)c(F)c4)cs3)coc2n(C)c1=O	0	0	0	0	34.3643	28.0198	22.5477
284565	284565	CHEMBL3922771	Cc1oc2c(c1CC(=O)Nc1nc(-c3ccc(OCC(F)(F)F)c(Cl)c3)cs1)c(=O)n(C)c(=O)n2C	0	0	0	0	34.8781	28.6933	21.0781
284738	284738	CHEMBL260556	COc1ccc(C)c(OC(CCN2CCC(n3c(=O)n(Cc4ncn[nH]4)c4ccccc43)CC2)C(C)C)c1	0	0	0	0	33.5325	14.111	20.1599
285040	285040	CHEMBL3815041	O=c1/c(=C/c2cccc(Oc3ccccc3)c2)sc2nc3ccccc3n12	0	0	0	0	33.5989	28.8426	29.7477
285092	285092	CHEMBL488953	COc1cc(/C=N/Nc2ncnc3sc4c(c23)CCCC4)ccc1OCC(=O)Nc1ccccc1	0	0	0	0	46.5375	37.9059	31.0821
285323	285323	CHEMBL1505034	COc1cccc(NC(=O)CSc2nc3c(sc4ccccc43)c(=O)n2CCCN2CCCC2)c1	0	0	0	0	37.9173	11.6044	19.6298
285633	285633	CHEMBL1598972	CCOc1ccc2[nH]c3nc(SCC(=O)OC(C)C)nnc3c2c1	0	0	0	0	57.3879	18.6274	27.4872
285649	285649	CHEMBL4098014	CCN(CC)CCn1cnc2ccc(-c3cnc(OC)c(NS(=O)(=O)c4ccc(F)cc4F)c3)cc2c1=O	0	0	0	0	25.3223	19.2753	18.4734
285744	285744	CHEMBL410296	COc1cc(Nc2nn3c(N[C@H](CO)C(C)C)cc(C)nc3c2C(N)=O)cc(OC)c1	0	0	3	0	36.2498	15.1388	21.1395
285817	285817	CHEMBL1172016	CCCCC(Sc1nc(OCCCCc2ccccc2)cc(OCCCCc2ccccc2)n1)C(=O)O	0	2	0	0	34.47	26.9365	17.8182
285856	285856	CHEMBL3983552	Cc1ccc(Oc2cnc(NC(=O)C(OC3CCOCC3)c3ccc(S(=O)(=O)C4CC4)cc3)s2)cc1C(=O)O	0	0	0	0	15.3374	15.8117	10.8866
285964	285964	CHEMBL3924792	[C-]#[N+]/C(=C\C1CC1)C(=O)N1CCC(n2nc(-c3ccc(Oc4ccc(Cl)c(Cl)c4)c(OC)c3)c3c(N)ncnc32)CC1	0	0	3	0	34.6237	14.893	16.8233
285992	285992	CHEMBL3962074	CCNc1ncc(-c2ccc(Oc3ncc(NC(=O)Nc4cc(C(F)(F)F)cnc4-c4ccc(C)cc4)cn3)cc2)s1	0	0	3	0	26.2525	19.1558	19.5233
285996	285996	CHEMBL3928969	Cc1ccc(-c2ncc(C(F)(F)F)cc2NC(=O)Nc2cnc(Oc3ccc(-c4cnc(N5CCCCCC5=O)s4)cc3)nc2)cc1C	0	0	3	0	50.4971	15.7255	24.5869
286004	286004	CHEMBL3921702	O=C(Nc1cnc(Oc2ccc(-c3cnc(N4CCCC4=O)s3)cc2)nc1)Nc1cc(C2CC2)nn1-c1ccccc1	0	0	3	0	50.1518	15.6725	24.714
286108	286108	CHEMBL4114718	[C-]#[N+]/C(=C\C(C)(C)N)C(=O)N1CCC[C@@H]1Cn1nc(-c2ccc(Oc3cccc(F)c3)cc2F)c2c(N)ncnc21	0	0	3	0	32.9016	13.7386	19.8464
286150	286150	CHEMBL259263	COc1ccc(C)c(OC(CCN2CCC(n3c(=O)n(Cc4cscn4)c4ccccc43)CC2)C(C)C)c1	0	0	0	0	37.6337	10.8023	23.9197
286236	286236	CHEMBL94657	C/C(=C\c1csc(C)n1)[C@@H]1C[C@@H]2O[C@]2(C)CCC[C@H](C)[C@H](O)[C@@H](C)C(=O)C(C)(C)[C@@H](O)CC(=O)O1	0	2	0	0	6.48896	1.58262	1.66786
286241	286241	CHEMBL3698938	Cc1c(C(=O)NCCCN(C)C)sc2ncnc(Nc3cccnc3OC(C)CCN)c12	0	0	3	0	26.28	19.4378	18.3592
286285	286285	CHEMBL2145095	CNC(=O)COc1ncnc2scc(-c3ccc(F)cc3)c12	0	0	0	0	32.5565	26.0687	23.7263
286301	286301	CHEMBL1597420	CCOc1ccc(-c2cn3c(n2)sc2cc(C(=O)NCCC4=CCCCC4)ccc23)cc1	0	0	0	0	54.0719	16.9711	24.7788
286307	286307	CHEMBL1355251	COc1ccc(-c2nc(SCC(=O)Nc3ccc4c(c3)OCO4)c(-c3ccccc3)[nH]2)cc1	0	0	0	0	35.2372	29.8378	26.4413
286736	286736	CHEMBL4096392	Cc1cc(C)nc(SCC(=O)Nc2cccc(COc3ccc(NS(=O)(=O)c4ccccc4)cc3)c2)n1	0	0	0	0	25.9163	22.4543	20.545
286757	286757	CHEMBL4129551	COc1ccc(-c2csc(C(Sc3nc(-c4cccc(OC)c4)c(C#N)c(=O)[nH]3)C(N)=O)n2)cc1	1	0	0	0	34.8548	28.0043	23.5898
286809	286809	CHEMBL3810159	O=C(NCc1ccc(OC(F)(F)F)cc1)c1c(-c2ccc3sc4ccccc4c3c2)nc2ccccn12	0	0	0	0	34.2044	30.2087	23.786
286891	286891	CHEMBL3740664	CCOc1ccc(/C=C/C(=O)Nc2nc(-c3c(C)cc(C)cc3C)cs2)cc1	0	0	0	0	34.5709	32.4161	25.261
286898	286898	CHEMBL4102033	Cc1ccc(OCC(=O)N(Cc2cccs2)c2ncccn2)cc1	0	0	0	0	32.817	26.5826	28.0838
287043	287043	CHEMBL3774449	COc1ccc(S(=O)(=O)c2ccc(F)cc2)c(Cc2c(C)c(CC(=O)O)c3ccncn23)c1	0	0	0	4	28.3184	25.4278	16.1493
287141	287141	CHEMBL4104248	O=C(NCc1cccc(OCCCOc2nc[nH]n2)c1)c1nc2scc(-c3cccc(F)c3)c2c(=O)[nH]1	1	0	0	0	45.9338	37.4395	28.1987
287150	287150	CHEMBL4079974	COc1ccccc1-c1csc2nc(C(=O)NCc3cccc(OCCOc4nc[nH]n4)c3)[nH]c(=O)c12	1	0	0	0	45.6587	37.3666	28.258
287326	287326	CHEMBL4171455	Cc1cc(C)nc(SCC(=O)Nc2cccc(COc3ccc(NC(=O)C4CCCN4)cc3)c2)n1	0	0	0	0	34.1788	10.6688	19.2551
287330	287330	CHEMBL4170414	CCOCC(=O)Nc1ccc(OCc2cccc(NC(=O)CSc3nc(C)cc(C)n3)c2)cc1	0	0	0	0	36.2182	28.4549	25.319
287597	287597	CHEMBL1406108	Cc1ccc(OCc2cc(=O)n3c4c(sc3n2)CCCC4)cc1C	0	0	0	0	32.8859	26.7274	28.7812
287599	287599	CHEMBL4075243	Cc1cc(/C=C/C#N)cc(C)c1Oc1nc(NC2CCN(Cc3cccc(C(N)=O)c3)CC2)nc2ccsc12	0	0	0	0	35.8804	10.8479	18.9895
287970	287970	CHEMBL3752242	O=C(COc1cc2cc(c1)Oc1cc(c([N+](=O)[O-])cc1[N+](=O)[O-])Oc1cc(OCC(=O)Nc3nc4ccc(Cl)cc4s3)cc(c1)Oc1cc(c([N+](=O)[O-])cc1[N+](=O)[O-])O2)Nc1nc2ccc(Cl)cc2s1	0	0	0	0	30.9624	15.8522	16.6096
288006	288006	CHEMBL3343941	CCOC(=O)C1=C(c2ccccc2)N=c2s/c(=C\c3ccc(OCC(=O)O)cc3)c(=O)n2C1c1ccc(Cl)cc1	0	0	0	0	38.0073	35.4435	21.2654
288419	288419	CHEMBL1459491	O=C(COc1ccccc1/C=C\c1nc(O)nc(O)c1[N+](=O)[O-])Nc1ccccc1	1	0	0	0	34.3685	16.3245	21.1109
288926	288926	CHEMBL1700925	CCCCn1c(SCC(=O)OCC)nc2c(sc(=S)n2-c2ccccc2OC)c1=O	0	0	0	0	34.1623	27.2089	28.8977
289185	289185	CHEMBL1474614	COc1ccc(Cl)cc1NC(=O)c1c(C(=O)Nc2cccc(C)c2C)sc2nc(C)cc(=O)n12	0	0	0	0	34.4131	28.8868	20.6318
289364	289364	CHEMBL4102395	COc1cccc(Cn2cnc3sc4c(c3c2=O)CCC(NCC2CCCCC2)C4)c1	0	0	0	0	39.6236	12.1368	20.4612
289421	289421	CHEMBL341083	CC(=O)N1C[C@H](O)C[C@H]1C(=O)NC(CCCN=C(N)N)C(=O)c1nccs1.O=C(O)C(F)(F)F	1	0	0	0	9.01355	3.2434	3.8264
289494	289494	CHEMBL1257204	O=C(c1cccc(OCC(O)CNC2CCN(c3ncnc4scc(-c5ccccc5)c34)CC2)c1)N1CCOCC1	0	0	0	0	35.988	11.003	18.8952
289574	289574	CHEMBL2003914	COc1ccc(C2=NNC(=O)c3ccccc3N2c2nc(-c3cccs3)nc3ccc(Br)cc23)cc1	0	0	0	0	48.9593	40.0423	29.9988
289928	289928	CHEMBL3931126	COc1cc(-c2cccc(OC(C)C)c2)ccc1-n1c(=O)ccc2cc(S(=O)(=O)Nc3ncccn3)ccc21	0	0	0	0	16.0491	14.632	14.734
289944	289944	CHEMBL3905275	COc1cc(-c2ccc(C)c(F)c2)c(F)cc1-n1c(=O)ccc2cc(S(=O)(=O)Nc3ncccn3)ccc21	0	0	0	0	23.3012	21.1707	18.307
289997	289997	CHEMBL1986316	COc1ccc(/C=N/Nc2ncnc3sc4c(c23)CCCC4)cc1OC	0	0	0	0	46.6516	37.266	49.9976
290381	290381	CHEMBL34960	COc1cc2c(cc1OC)-c1cc(N(CP(C)(C)=O)c3c(F)cccc3F)nc(=O)n1CC2	0	0	0	0	36.7094	26.9909	29.4696
290437	290437	CHEMBL1335076	Cc1ccc(OCc2cc(=O)n3c4c(sc3n2)CCCC4)c(C)c1	0	0	0	0	32.9312	26.8357	28.8356
290546	290546	CHEMBL1464422	CCOc1ccc2c(c1)sc1nc(C(=O)OC)cc(=O)n12	0	0	0	0	32.4635	26.3537	28.8514
290634	290634	CHEMBL4081156	CCOC(=O)C1=C(CN2CCOC[C@H]2C(=O)O)NC(c2nccs2)=N[C@H]1c1ccc(F)c(F)c1Cl	0	0	0	0	41.5187	13.4199	12.742
290746	290746	CHEMBL1437089	Cc1ccc(-c2nc3c(c(SCC(=O)N4CCCCC4)n2)Cc2cc(C)ccc2O3)cc1	0	0	0	0	55.7962	17.2904	33.0608
290915	290915	CHEMBL434730	Cc1nc2cc(OC[C@H](O)CN3CCN(Cc4nc(-c5ccc(C(C)(C)C)cc5)no4)CC3)ccc2s1	0	0	0	0	36.7965	10.9003	20.2721
290991	290991	CHEMBL3557137	CC(C)CN1CCC2(CCN(Cc3nccs3)CC2)C1=O	0	0	0	0	11.6094	1.37961	18.851
291014	291014	CHEMBL3343152	COc1ccc(-c2nnc(N3CCN(C(=O)CN4CCN(c5ccc(Cl)cc5)CC4)CC3)nc2-c2ccc(OC)cc2)cc1	0	0	0	0	34.3837	14.0424	27.7876
291133	291133	CHEMBL4089467	COc1ccc(Cn2cc(CNC(=O)c3csc4nc(-c5ccc(F)cc5)cn34)nn2)cc1OC	0	0	0	0	46.0554	37.8985	31.2281
291137	291137	CHEMBL124313	COc1cc2c(N3CCN(C(=O)Nc4ccc(OC(C)C)cc4)CC3)ncnc2cc1OCCN1CCS(=O)(=O)CC1	0	0	3	0	14.5716	11.2184	14.9538
291166	291166	CHEMBL3692520	Cc1ncsc1C(O)c1c(C(N)=O)nc2n1CCOc1cc(F)c(C#CC(C)(C)O)cc1-2	0	0	3	0	52.1863	16.3628	24.0274
291187	291187	CHEMBL4062324	Nc1nc(O[C@H](c2ccc(Cl)cc2-n2ccc(COS(=O)(=O)O)n2)C(F)(F)F)cc(N2CCC3(CC2)CNC(C(=O)O)C3)n1	0	0	0	0	13.4144	10.5437	10.0551
291390	291390	CHEMBL3331234	COc1ccc(-c2cc3c4c(I)cccc4n(C(C)=O)c3nn2)cc1	0	0	0	0	52.1794	34.6847	38.3019
291463	291463	CHEMBL1416394	COc1ccc(-c2csc(NC(=O)C3COc4ccccc4O3)n2)cc1OC	0	0	0	0	34.4084	31.8753	26.6885
291491	291491	CHEMBL3360330	COc1ccc(-c2cccc3nc(Nc4ccc(NC(C)=O)cc4)nn23)cc1	0	0	3	0	34.7602	21.407	22.2717
291809	291809	CHEMBL4088171	COc1cc2ncnc(Nc3ccc(F)c(Cl)c3)c2cc1NC(=O)N/N=C/c1ccc(OC)c(OC)c1OC	0	0	0	0	32.5549	20.6169	17.6975
[truncated: 12,884 more rows]

## Sheet: supp.T12 Band2-Pubchem
All data points in band 2									island1
ChEMBL ID	type	ID	posX	posY	posZ	r	Smiles		type	ID	posX	posY	posZ	posX_4dp	Matched_SMILES	Matched_ID		type	ID	posX	posY	posZ	posX_4dp	Matched_SMILES	Matched_ID
CHEMBL10	49	10	5.5262	14.4962	5.4796	16.4531	C[S+]([O-])c1ccc(-c2nc(-c3ccc(F)cc3)c(-c3ccncc3)[nH]2)cc1		1	0	13.5674	37.0842	15.1755	13.5674	CC1CCN(c2ncnc3[nH]cc(-c4cccc(C#N)c4)c23)C1	3928018		1	0	2.5797	7.8782	3.0615	2.5797	Cc1nc(C)c(-c2ccnc(N)n2)s1	47302
CHEMBL100144	64	100144	8.9331	24.3043	10.0896	27.7903	Oc1nc2c(c3nc(-c4ccccc4F)nn13)CN(Cc1cccnc1)CC2		1	0	13.574	37.2982	15.1584	13.574	N#Cc1cccc(-c2c[nH]c3ncnc(N4CCCC4)c23)c1	3393344		1	0	2.5695	7.8647	3.05	2.5695	CNc1nccc(-c2sc(C)nc2C)n1	46474
CHEMBL100148	64	100148	4.9334	13.0597	4.9495	14.8119	Cc1cc(-c2nc3c(cnc4ccccc43)[nH]2)cs1		1	0	13.5189	37.1375	15.1195	13.5189	N#Cc1cccc(-c2c[nH]c3ncnc(N4CC[C@H](F)C4)c23)c1	3969062		1	0	2.5841	7.8667	3.0748	2.5841	Cc1nc(C)c(-c2ccnc(N(C)C)n2)s1	43828
CHEMBL100168	64	100168	14.1438	43.2281	18.208	48.9923	CCCc1nc(Nc2c(C)cc(C)cc2C)n2ccnc(N(CC)CC)c12		1	0	13.517	37.08	15.0907	13.517	N#Cc1cccc(-c2c[nH]c3ncnc(N4CCCC4)c23)c1F	3975129		1	0	2.9125	7.912	2.7999	2.9125	CSc1nnc(Cn2c(=O)sc3ccccc32)n1CCc1ccccc1	1388023
CHEMBL100319	64	100319	6.771	19.3536	7.3713	21.7886	Cc1cccc2ncc(CSCc3ccccc3)n12		1	0	13.5072	37.3425	15.2912	13.5072	c1ccc(CN2CCCC23CCN(c2ncnc4[nH]ccc24)C3)cc1	3693630		1	0	2.9118	7.9215	2.795	2.9118	Cl.N=C(N)N/N=C\c1c(-c2ccc(F)c(F)c2)nc2sccn12	1910600
CHEMBL100453	64	100453	9.7107	26.87	10.372	30.3953	CCCCc1nc(-c2ncccn2)cn1Cc1ccc(-c2ccccc2-c2nn[nH]n2)cc1		1	0	13.5503	37.2116	15.0944	13.5503	c1ccc(-c2c[nH]c3ncnc(N4CCCC4)c23)cc1	3924603		1	0	2.9091	7.9095	2.8076	2.9091	Cc1cn2c(/C=N\NC(=N)N)c(-c3ccc(F)cc3)nc2s1.Cl	1910605
CHEMBL10087	64	10087	5.628	14.0863	6.3635	16.4497	CCOCCn1c([S+]([O-])Cc2nccc(SCC)c2C)nc2ccccc21		1	0	13.4742	37.0145	15.0975	13.4742	N#Cc1cccc(-c2c[nH]c3ncnc(N4CCC(F)(F)C4)c23)c1	3915904		1	0	2.8982	7.8956	2.7823	2.8982	Cl.N=C(N)N/N=C\c1c(-c2c(F)cccc2F)nc2sccn12	1910599
CHEMBL100943	64	100943	14.1438	43.2281	18.208	48.9923	CCc1nc(Nc2c(C)cc(C)cc2C)n2ccnc(N(CC)CC)c12		1	0	13.4973	37.155	15.3583	13.4973	Cc1c[nH]c2ncnc(N3CC[C@@H](NCc4ccccc4)C3)c12	1173306		1	0	2.9093	7.8891	2.7886	2.9093	Cl.N=C(N)N/N=C\c1c(-c2cccc(C(F)(F)F)c2)nc2sccn12	1910604
CHEMBL100979	1	100979	10.66	32.5727	13.7654	36.9338	Cc1nc2ccccn2c1-c1ccnc(N)n1		1	0	13.5811	37.2184	15.5418	13.5811	CN(c1ncnc2[nH]ccc12)[C@H]1CN(Cc2ccccc2)CC12CC2	4279618		1	0	2.9084	7.91	2.7958	2.9084	Cl.N=C(N)N/N=C\c1c(-c2ccc(F)cc2)nc2sccn12	1910597
CHEMBL101348	64	101348	2.5256	5.2239	1.5546	6.00704	S=C(NCCc1ccccc1)Nc1ncc(Cl)s1		1	0	13.5997	37.9513	15.1184	13.5997	N#Cc1c[nH]c2nc(N)nc(NCc3ccccc3)c12	4072693		1	0	2.9084	7.91	2.7958	2.9084	Cl.N=C(N)N/N=C\c1c(-c2ccc(F)cc2)nc2sccn12	1910597
CHEMBL101363	64	101363	5.8276	15.8404	6.2652	18.0037	C[n+]1c(/C=C/c2ccc(/C=N/NC(=N)N3CCCC3)cc2)cn2ccccc21.Cc1ccc(S(=O)(=O)O)cc1.Cc1ccc(S(=O)(=O)[O-])cc1		1	0	13.5952	37.5385	15.1772	13.5952	N#C/C(=C\c1cccnc1)c1c[nH]c2ncccc12	3753668		1	0	2.6488	8.0119	3.1526	2.6488	Cc1nc(C)c(-c2ccnc(Nc3cccc(N)c3)n2)s1	47636
CHEMBL101385	64	101385	9.7143	26.8056	10.3237	30.323	CCCCc1nc(-c2ccc(C)n[n+]2[O-])cn1Cc1ccc(-c2ccccc2-c2nn[nH]n2)cc1		1	0	13.7762	37.7845	15.3209	13.7762	N#Cc1cccc(-c2c[nH]c3ncnc(N4CCC4)c23)c1	3393345		1	0	2.6439	7.9461	3.127	2.6439	CCCNc1ncc(-c2ccnc(C3CC3)n2)s1	1255811
CHEMBL101399	64	101399	14.3063	41.0307	17.5893	46.8783	Nc1nc(N(Cc2ccccc2)Cc2ccccc2)c2nc(-c3ccccc3)cnc2n1		1	0	13.7544	38.3477	15.1586	13.7544	CN(C)c1ncnc2[nH]cc(-c3ccccc3)c12	3919118		1	0	2.6564	8.0245	3.1633	2.6564	Cc1nc(C)c(-c2ccnc(Nc3ccc(N)cc3)n2)s1	1084454
CHEMBL101513	64	101513	13.8846	40.261	17.1596	45.9149	Cc1ccc(-c2cnc3nc(N)nc(N(C)C)c3n2)cc1		1	0	13.8111	38.256	15.2788	13.8111	CN(C)c1ncnc2[nH]cc(-c3cccc(C#N)c3F)c12	3891060		1	0	2.6739	8.0299	3.1901	2.6739	CNc1ccc(Nc2nccc(-c3sc(C)nc3C)n2)cc1	1083150
CHEMBL101574	64	101574	14.1178	43.1021	18.199	48.8703	CCCN(CCC)c1nccn2c(Nc3c(C)cc(C)cc3C)nc(CC)c12		1	0	13.7393	38.0916	15.229	13.7393	CN(C)c1ncnc2[nH]cc(-c3cc(F)cc(C#N)c3)c12	3968012		1	0	2.7587	8.0183	3.33	2.7587	CNc1nc(C)c(-c2ccnc(Nc3cccc(N4CCCNCC4)c3)n2)s1	2348652
CHEMBL101589	64	101589	10.0808	27.9222	11.1107	31.6973	Br.C=CCNC(=N)N/N=C/c1ccc(-c2cn3ccccc3[n+]2C)cc1.[Br-]		1	0	13.8232	38.3644	15.2854	13.8232	CN(C)c1ncnc2[nH]cc(-c3cccc(C#N)c3)c12	3393346		1	0	2.7683	8.0238	3.336	2.7683	CNc1nc(C)c(-c2nc(Nc3cccc(N4CCCNCC4)c3)ncc2F)s1	2348650
CHEMBL101590	64	101590	9.9127	27.6861	11.0115	31.4012	Br.CC/N=C(\NCC)N/N=C/c1ccc(/C=C/c2cn3c(C)cccc3[n+]2C)cc1.[Br-]		1	0	13.8012	38.3984	15.2602	13.8012	CNc1ncnc2[nH]cc(-c3cccc(C#N)c3)c12	3904634		1	0	2.8533	8.0172	3.3461	2.8533	CNc1nc(C)c(-c2nc(Nc3cccc(N4CCCNCC4)c3)ncc2C#N)s1	2312185
CHEMBL101597	64	101597	9.6791	27.0404	10.2764	30.5036	CCCCc1nc(-c2cncc[n+]2[O-])cn1Cc1ccc(-c2ccccc2-c2nn[nH]n2)cc1		1	0	13.8404	38.8336	15.287	13.8404	Cc1ccc(-c2ccnc3[nH]cc(C#N)c23)cc1	4075407		1	0	3.3088	8.5095	2.7639	3.3088	Nc1nc2c(s1)-c1nc(Nc3cccc([N+](=O)[O-])c3)ncc1CC2	598992
CHEMBL101746	64	101746	5.9166	15.9133	6.135	18.0521	Cc1nc2cnccc2n1Cc1ccc(S(=O)(=O)N(C)c2cccc(N)c2)cc1		1	0	13.8511	38.8613	15.3111	13.8511	Cc1ccccc1-c1ccnc2[nH]cc(C#N)c12	4076248		1	0	3.2798	8.4712	2.7552	3.2798	CNc1nc(-c2ccccc2)c(-c2ccnc(Nc3cccc([N+](=O)[O-])c3)n2)s1	2312193
CHEMBL101817	64	101817	9.4037	25.0856	10.164	28.6535	Oc1nc2c(c3nc(-c4ccc[nH]4)nn13)CN(Cc1ccccc1)CC2		1	0	13.9425	37.9914	15.5801	13.9425	CC(C)(CN)CNc1cc(-c2c[nH]c3ncccc23)cc(F)n1	1987261		1	0	2.5461	8.0692	2.888	2.5461	Cc1nc(N)sc1-c1ccnc(Nc2cccc([N+](=O)[O-])c2)n1	298445
CHEMBL1019	64	1019	8.9862	28.2263	11.8032	31.8872	Brc1c(Nc2ncc[nH]2)ccc2nccnc12		1	0	13.9298	38.3884	15.4062	13.9298	CCN(CC)c1ncnc2[nH]cc(-c3cccc(C#N)c3)c12	3393347		1	0	2.6573	8.6838	2.895	2.6573	NS(=O)(=O)c1ccc(Nc2nc3ncnc(Nc4cccc(Br)c4)c3s2)cc1	469354
CHEMBL101924	1	101924	3.4579	8.3736	2.8385	9.49375	c1ccc(-c2cnc(Nc3ncccn3)s2)cc1		1	0	13.9528	39.0546	15.4417	13.9528	Cc1cccc(-c2cc(N)nc3[nH]cc(C#N)c23)c1	3961632		1	0	2.5478	8.0864	2.8888	2.5478	C=CCNc1nc(C)c(-c2ccnc(Nc3cccc([N+](=O)[O-])c3)n2)s1	47249
CHEMBL102162	64	102162	3.8258	12.0032	3.6151	13.1066	Cc1sc(C)c2c1CCCc1ncn(C)c1-2		1	0	13.9269	39.1252	15.435	13.9269	N#Cc1c[nH]c2nc(N)cc(-c3ccccc3)c12	3896115		1	0	2.544	8.0742	2.8952	2.544	Cc1nc(N(C)C)sc1-c1ccnc(Nc2cccc([N+](=O)[O-])c2)n1	46401
CHEMBL102395	64	102395	5.7998	15.7694	6.2187	17.916	C[n+]1c(-c2ccc(/C=C/C=N/NC(=N)N)cc2)cn2ccccc21.Cc1ccc(S(=O)(=O)O)cc1.Cc1ccc(S(=O)(=O)[O-])cc1		1	0	14.0672	39.0484	15.5927	14.0672	Cc1cc(-c2ccnc3[nH]cc(C#N)c23)ccc1CN(C)C	3949880		1	0	2.6313	8.0798	2.8427	2.6313	CNc1nc(C)c(-c2nc(Nc3cccc([N+](=O)[O-])c3)ncc2C#N)s1	2312182
CHEMBL102419	64	102419	5.7826	15.7978	6.2407	17.9431	Cc1ccc(S(=O)(=O)O)cc1.Cc1ccc(S(=O)(=O)[O-])cc1.Cc1cccc2n1cc(/C=C/c1ccc(/C=N/NC(=N)N)cc1)[n+]2C		1	0	14.1294	39.3003	15.454	14.1294	NCc1ccc(-c2c[nH]c3ncc(-c4ccccc4)cc23)cc1	554730		1	0	2.5003	8.0328	2.856	2.5003	Cc1nc(C)c(-c2ccnc(Nc3ccc(N(C)C)c([N+](=O)[O-])c3)n2)s1	295484
CHEMBL102424	64	102424	9.8864	27.7268	10.934	31.4017	Br.Cc1ccc2n(c1)cc(/C=C/c1ccc(/C=N/NC(=N)N)cc1)[n+]2C.[Br-]		1	0	14.3932	39.1792	16.1937	14.3932	c1cnc2[nH]cc(-c3ccnc(NC4CCCC4)n3)c2c1	1808237		1	0	2.5462	8.0739	2.8958	2.5462	Cc1nc(C)c(-c2ccnc(N(C)c3cccc([N+](=O)[O-])c3)n2)s1	297614
CHEMBL102449	64	102449	10.0808	27.9222	11.1107	31.6973	Br.CCNC(=N)N/N=C/c1ccc(-c2cn3ccc(C)cc3[n+]2C)cc1.[Br-]		1	0	14.421	39.1664	16.0807	14.421	c1cnc2[nH]cc(-c3ccnc(N[C@@H]4C[C@@H]5CC[C@@H]4C5)n3)c2c1	1807517		1	0	2.5559	8.0542	2.8657	2.5559	CNc1nc(CC(F)(F)F)c(-c2ccnc(Nc3cccc([N+](=O)[O-])c3)n2)s1	2348653
CHEMBL102458	64	102458	9.9683	27.7283	11.1149	31.4923	Br.C[n+]1c(-c2ccc(/C=N/NC3=NCCN3)cc2)cn2ccccc21.[Br-]		1	0	14.3122	39.1443	16.1742	14.3122	CN(c1ccc(C#N)cc1)[C@@H]1CCN(c2ncnc3[nH]ccc23)C1	3899672		1	0	2.5516	8.0833	2.9044	2.5516	Cc1nc(C)c(-c2ccnc(Nc3cccc([N+](=O)[O-])c3)n2)s1	45408
CHEMBL102480	64	102480	9.9607	27.6196	11.1539	31.4081	Br.Cc1ccc2n(c1)cc(/C=C/c1ccc(/C=N/NC3=NCCCN3)cc1)[n+]2C.[Br-]		1	0	14.4759	39.7079	15.9788	14.4759	FC(F)(F)c1ccc(CNc2ccc(Cc3c[nH]c4ncccc34)cn2)cc1	4224714		1	0	2.5899	8.6645	2.7922	2.5899	NS(=O)(=O)c1ccc(Nc2nc3ncnc(Nc4ccccc4)c3s2)cc1	511839
CHEMBL102512	64	102512	9.9021	27.6859	10.9078	31.3615	C/N=C(\NC)N/N=C/c1ccc(-c2cn3ccccc3[n+]2C)cc1.I.[I-]		1	0	14.3872	39.7778	15.9954	14.3872	N#Cc1c[nH]c2nc(Nc3ccccn3)cc(-c3ccccc3)c12	3925092		1	0	2.5342	8.0526	2.8964	2.5342	Cc1nc(C)c(-c2ccnc(Nc3ccc([N+](=O)[O-])cc3)n2)s1	47690
CHEMBL102805	64	102805	10.0108	27.8123	11.0184	31.5459	Br.CC/N=C(\NCC)N/N=C/c1ccc(-c2cn3ccccc3[n+]2C)cc1.[Br-]		1	0	14.4667	39.7642	15.9871	14.4667	c1ccc(-c2ccnc3[nH]ccc23)nc1	4214498		1	0	2.5506	8.0836	2.8903	2.5506	CNc1nc(C)c(-c2ccnc(Nc3cccc([N+](=O)[O-])c3)n2)s1	46429
CHEMBL102816	64	102816	5.8473	15.8694	6.3428	18.0627	C[n+]1c(-c2ccc(/C=N/Nc3ccccn3)cc2)cn2ccccc21.Cc1ccc(S(=O)(=O)[O-])cc1		1	0	14.3411	39.2601	16.2497	14.3411	CN(c1c(F)cc(C#N)cc1F)[C@@H]1CCN(c2ncnc3[nH]ccc23)C1	3913608		1	0	2.9196	8.2652	2.8134	2.9196	Cl.N=C(N)N/N=C/c1c(-c2ccc([N+](=O)[O-])cc2)nc2sc(Cl)cn12	1910625
CHEMBL10283	64	10283	5.2661	14.3625	5.4959	16.2548	CCSc1ccnc(C[S+]([O-])c2nc3ccccc3n2COC)c1C		1	0	14.3838	39.3307	16.2727	14.3838	CN(c1ccc(C#N)cc1F)[C@@H]1CCN(c2ncnc3[nH]ccc23)C1	3915857		1	0	2.9542	8.2473	3.0218	2.9542	C(=C/c1c(-c2ccccc2)nc2sccn12)\c1ccncn1	505610
CHEMBL102875	64	102875	9.955	27.707	11.2058	31.5016	Br.Cc1cccc2n1cc(/C=C/c1ccc(/C=N/NC(=N)N3CCCC3)cc1)[n+]2C.[Br-]		1	0	14.3838	39.3307	16.2727	14.3838	CN(c1ccc(C#N)cc1F)[C@@H]1CCN(c2ncnc3[nH]ccc23)C1	3915857		1	0	2.9222	8.2737	2.8153	2.9222	Cl.N=C(N)N/N=C/c1c(-c2ccc(F)c([N+](=O)[O-])c2)nc2sc(Cl)cn12	1910374
CHEMBL102886	64	102886	9.9607	27.6196	11.1539	31.4081	Br.Cc1cccc2n1cc(/C=C/c1ccc(/C=N/NC3=NCCCN3)cc1)[n+]2C.[Br-]		1	0	14.4563	39.9144	16.203	14.4563	Cc1nccc(-c2c[nH]c3ncccc23)n1	3814215		1	0	2.9575	8.283	2.8152	2.9575	Cl.N=C(N)N/N=C/c1c(-c2ccc([N+](=O)[O-])cc2)nc2sccn12	1910633
CHEMBL102889	64	102889	10.0306	27.766	11.1876	31.571	Br.C[n+]1c(-c2ccc(/C=N/NC(=N)N3CCCC3)cc2)cn2ccccc21.[Br-]		1	0	14.3411	39.2601	16.2497	14.3411	CN(c1c(F)cc(C#N)cc1F)[C@@H]1CCN(c2ncnc3[nH]ccc23)C1	3913608		1	0	2.9613	8.2819	2.7964	2.9613	Cl.N=C(N)N/N=C\c1c(-c2ccc(F)c([N+](=O)[O-])c2)nc2sccn12	1910602
CHEMBL102934	64	102934	10.0808	27.9222	11.1107	31.6973	Br.CCNC(=N)N/N=C/c1ccc(-c2cn3cc(C)ccc3[n+]2C)cc1.[Br-]		1	0	14.3972	39.3427	16.2787	14.3972	CN(c1cccc(C#N)c1)[C@@H]1CCN(c2ncnc3[nH]ccc23)C1	3975138		1	0	2.9466	8.2606	2.8049	2.9466	Cc1cn2c(/C=N\NC(=N)N)c(-c3ccc(F)c([N+](=O)[O-])c3)nc2s1.Cl	1910606
CHEMBL103070	64	103070	10.025	27.8517	11.0406	31.5929	Br.CNC(=N)N/N=C/c1ccc(-c2cn3ccccc3[n+]2C)cc1.[Br-]		1	0	14.5048	39.488	16.3618	14.5048	C#CCN(c1ccc(C#N)cc1)[C@@H]1CCN(c2ncnc3[nH]ccc23)C1	3905748		1	0	2.9613	8.2848	2.8275	2.9613	Cl.N=C(N)N/N=C\c1c(-c2ccc(F)c([N+](=O)[O-])c2)nc2sccn12	1910602
CHEMBL103186	64	103186	9.8478	27.2304	10.815	30.9102	Cc1ccc2n(c1)cc(-c1ccc(/C=N/Nc3nc(N)nc(N)n3)cc1)[n+]2C.[I-]		1	0	14.5659	39.7719	16.1648	14.5659	c1cnc2[nH]cc(-c3ccnc(N4CCCC4)n3)c2c1	4068940		1	0	2.9574	8.2858	2.8046	2.9574	Cl.N=C(N)N/N=C\c1c(-c2ccc(Br)c([N+](=O)[O-])c2)nc2sccn12	1909651
CHEMBL103210	64	103210	6.3138	15.8104	7.0255	18.4171	CCOC[C@H](CC(C)C)N(Cc1ccc(N)cc1)S(=O)(=O)c1ccc(Cn2c(C)nc3cnccc32)cc1		1	0	14.5869	40.0854	16.292	14.5869	CCc1cc(-c2c[nH]c3ncccc23)ncn1	3813792		1	0	2.9474	8.2772	2.8076	2.9474	Cl.N=C(N)N/N=C\c1c(-c2ccc([N+](=O)[O-])cc2)nc2sc(F)cn12	1910607
CHEMBL103374	64	103374	9.9127	27.6861	11.0115	31.4012	Br.CC/N=C(\NCC)N/N=C/c1ccc(/C=C/c2cn3ccccc3[n+]2C)cc1.[Br-]		1	0	14.572	39.7075	16.4794	14.572	C#CCN(c1c(F)cc(C#N)cc1F)[C@@H]1CCN(c2ncnc3[nH]ccc23)C1	3930290		1	0	2.9613	8.2848	2.8275	2.9613	Cl.N=C(N)N/N=C\c1c(-c2ccc(F)c([N+](=O)[O-])c2)nc2sccn12	1910602
CHEMBL103616	64	103616	10.0258	27.6764	11.1201	31.4668	Br.C[n+]1c(-c2ccc(/C=N/NC3=NCCCN3)cc2)cn2ccccc21.[Br-]		1	0	14.6821	40.0886	16.5081	14.6821	CCCCNc1cc(-c2c[nH]c3ncccc23)ncn1	1968459		1	0	2.9347	8.2419	3.0137	2.9347	Clc1nccc(/C=C/c2c(-c3ccccc3)nc3sccn23)n1	501444
CHEMBL103679	64	103679	10.0118	27.3548	11.2641	31.2314	Br.C[n+]1c(-c2ccc(/C=N/NC(=N)N3CCCCC3)cc2)cn2ccccc21.[Br-]		1	0	14.6258	39.8083	16.5162	14.6258	C#CCN(c1ccc(C#N)cc1F)[C@@H]1CCN(c2ncnc3[nH]ccc23)C1	3964413		1	0	2.9536	8.2855	2.8109	2.9536	Cc1cn2c(/C=N/NC(=N)N)c(-c3ccc([N+](=O)[O-])cc3)nc2s1.Cl	1910626
CHEMBL103730	64	103730	10.0808	27.9222	11.1107	31.6973	Br.CCCNC(=N)N/N=C/c1ccc(-c2cn3ccccc3[n+]2C)cc1.[Br-]		1	0	14.5205	40.0952	16.3336	14.5205	Nc1nccc(-c2c[nH]c3ncccc23)n1	405665		1	0	2.9528	8.2595	2.8025	2.9528	Cc1cn2c(/C=N/NC(=N)N)c(-c3cccc([N+](=O)[O-])c3)nc2s1.Cl	1910750
CHEMBL103871	64	103871	15.7819	46.1539	19.412	52.4983	c1ccc(-c2nc(CN3CCN(c4ccccc4)CC3)c[nH]2)cc1		1	0	14.6283	40.1704	16.3918	14.6283	CCCc1cc(-c2c[nH]c3ncccc23)nc(N)n1	3814350		1	0	2.9438	8.0935	3.0383	2.9438	Nc1ccnc(/C=C/c2c(-c3ccccc3)nc3sccn23)n1	527110
CHEMBL103963	64	103963	9.9635	27.8052	11.0767	31.5451	Br.CCNC(=N)N/N=C/c1ccc(/C=C/c2cn3ccccc3[n+]2C)cc1.[Br-]		1	0	14.6283	40.1704	16.3918	14.6283	CCCc1cc(-c2c[nH]c3ncccc23)nc(N)n1	3814350		1	0	2.9136	8.2491	2.8193	2.9136	Cl.N=C(N)N/N=C/c1c(-c2cccc([N+](=O)[O-])c2)nc2sc(Cl)cn12	1910637
CHEMBL10398	64	10398	5.5776	13.9613	6.3194	16.3084	CCSc1ccnc(CSc2nc3ccccc3n2CC2CO2)c1C		1	0	14.8249	40.8889	16.368	14.8249	CCC1Nc2ccccc2-c2ccnc3[nH]cc1c23	592520		1	0	2.9562	8.2591	2.81	2.9562	Cl.N=C(N)N/N=C/c1c(-c2cccc([N+](=O)[O-])c2)nc2sccn12	1910752
CHEMBL104133	64	104133	10.0938	27.9046	11.1421	31.697	Br.CCCCNC(=N)N/N=C/c1ccc(-c2cn3ccc(C)cc3[n+]2C)cc1.[Br-]		1	0	14.595	40.4773	16.1701	14.595	N#Cc1c[nH]c2nc(N)nc(-c3ccccc3F)c12	4066605		1	0	2.9513	8.2509	2.8093	2.9513	CCCc1cn2c(/C=N/NC(=N)N)c(-c3cccc([N+](=O)[O-])c3)nc2s1.Cl	1910747
CHEMBL104149	64	104149	5.488	14.9065	5.8876	16.9407	CCCCSc1ccc2n(c1)cc(-c1ccc(/C=N/NC(=N)N3CCCC3)cc1)[n+]2C.Cc1ccc(S(=O)(=O)O)cc1.Cc1ccc(S(=O)(=O)[O-])cc1		1	0	14.7048	40.6559	16.2416	14.7048	[C-]#[N+]c1ccc(F)c(-c2c[nH]c3ncnc(N(C)C)c23)c1	3903551		1	0	2.9522	8.2739	2.8185	2.9522	CCCc1cn2c(/C=N/NC(=N)N)c(-c3ccc([N+](=O)[O-])cc3)nc2s1.Cl	1910754
CHEMBL104365	64	104365	6.7662	18.4865	6.6173	20.7683	O=S(=O)(NCCCCc1c[nH]cn1)NCc1ccccc1		1	0	14.595	40.4773	16.1701	14.595	N#Cc1c[nH]c2nc(N)nc(-c3ccccc3F)c12	4066605		1	0	2.6429	8.0328	3.1348	2.6429	N=c1sccn1CC(=O)NC(c1ccccc1)c1ccccc1	1617391
CHEMBL104366	64	104366	6.7702	18.4816	6.6113	20.7633	O=S(=O)(NCCCCc1c[nH]cn1)NCc1ccc(I)cc1		1	0	14.603	40.533	16.1414	14.603	N#Cc1c[nH]c2nc(N)nc(-c3ccccc3)c12	4104076		1	0	2.6342	8.0507	3.14	2.6342	Fc1ccc(Nc2nccc(-c3nccs3)n2)cc1	475195
CHEMBL104393	64	104393	5.2167	14.3049	5.5174	16.1952	Br.CC[S+]([O-])c1ccc2n(c1)cc(-c1ccc(/C=N/NC(=N)N)cc1)[n+]2C.[Br-]		1	0	14.595	40.4773	16.1701	14.595	N#Cc1c[nH]c2nc(N)nc(-c3ccccc3F)c12	4066605		1	0	2.6381	8.035	3.1258	2.6381	CCCCn1c(Sc2nc3cccc(F)c3s2)nc2c(N)ncnc21	213801
CHEMBL104433	64	104433	5.8107	15.7928	6.0838	17.8938	C[n+]1c(-c2ccc(C(N)=S)cc2)cn2ccccc21.Cc1ccc(S(=O)(=O)[O-])cc1		1	0	14.36	40.8279	16.4314	14.36	Nc1c[nH]c2ncc(-c3ccccc3)cc12	40493		1	0	2.6429	8.0328	3.1348	2.6429	N=c1sccn1CC(=O)NC(c1ccccc1)c1ccccc1	1617391
CHEMBL104469	64	104469	9.8853	27.7719	10.9862	31.4594	Br.C[n+]1c(/C=C/c2ccc(/C=N/NC(=N)NO)cc2)cn2ccccc21.[Br-]		1	0	14.7346	40.2051	16.5079	14.7346	CCCCc1cc(-c2c[nH]c3ncccc23)nc(N)n1	3814340		1	0	2.6429	8.0328	3.1348	2.6429	N=c1sccn1CC(=O)NC(c1ccccc1)c1ccccc1	1617391
CHEMBL104503	64	104503	5.8849	15.9924	6.2787	18.1607	C[n+]1c(-c2ccc(/C=N/NC(N)=S)cc2)cn2ccccc21.Cc1ccc(S(=O)(=O)[O-])cc1		1	0	14.7333	40.39	16.4811	14.7333	CCc1cc(-c2c(C)[nH]c3ncccc23)nc(N)n1	3814415		1	0	2.784	8.4422	3.2569	2.784	CNc1ncc(-c2ccnc(Nc3cccc(S(N)(=O)=O)c3)n2)s1	2348845
CHEMBL104516	64	104516	5.5009	13.6928	6.2503	16.0256	Cc1cccc(Sc2nc(N)nc3c2ncn3CCOCP(=O)(OCC(F)(F)F)OCC(F)(F)F)c1		1	0	14.7719	40.2735	16.6066	14.7719	NCCCCc1cc(-c2c[nH]c3ncccc23)nc(N)n1	3813908		1	0	2.7058	8.0473	3.2338	2.7058	Cc1nc(C)c(-c2ccnc(Nc3ccc(N(C)C)cc3)n2)s1	46817
CHEMBL104588	64	104588	9.9757	27.8202	10.9971	31.5343	Br.Cc1ccn2cc(-c3ccc(/C=N/NC(=N)NO)cc3)[n+](C)c2c1.[Br-]		1	0	14.7273	40.2793	16.5611	14.7273	NCCCc1cc(-c2c[nH]c3ncccc23)nc(N)n1	3814554		1	0	2.9018	8.342	3.3414	2.9018	CNc1nc(C)c(-c2nc(Nc3cccc(S(C)(=O)=O)c3)ncc2C#N)s1	3087444
CHEMBL104597	64	104597	10.3385	28.6588	11.2763	32.4864	Br.C[n+]1c(-c2ccc(/C=N/NC(=N)N)cc2)c(Br)n2ccccc21.[Br-]		1	0	14.7346	40.2051	16.5079	14.7346	CCCCc1cc(-c2c[nH]c3ncccc23)nc(N)n1	3814340		1	0	2.7808	8.0667	3.3741	2.7808	Cc1nc(C)c(-c2ccnc(Nc3ccc(N4CCN(C)CC4)cc3)n2)s1	3764046
CHEMBL104619	64	104619	2.9564	7.8317	2.8674	8.8486	Br.C[n+]1c(-c2ccc(/C=N/NC3=NCCCN3)cc2)cn2ccsc21.[Br-]		1	0	14.5977	40.9188	16.7106	14.5977	c1ccc(-c2cnc3[nH]cc(CNc4cccnc4)c3c2)cc1	4066045		1	0	2.8509	8.5351	3.3532	2.8509	CNc1nc(C(F)(F)F)c(-c2ccnc(Nc3ccc(S(N)(=O)=O)cc3)n2)s1	2348843
CHEMBL104672	64	104672	2.8956	7.7866	2.8199	8.77311	Br.C[n+]1c(-c2ccc(/C=N/NC3=NCCN3)cc2)cn2ccsc21.[Br-]		1	0	14.8762	40.76	16.4453	14.8762	N#Cc1cccc(Cc2nc(-c3ccc(F)cc3)c(-c3ccnc(NC4CC4)n3)[nH]2)c1	520437		1	0	2.8153	8.4952	3.2963	2.8153	Cn1cnc2c(sc3nc4ccccc4n32)c1=N	1973439
CHEMBL104755	64	104755	5.3087	14.6522	5.6825	16.5879	Br.CCS(=O)(=O)c1ccc2n(c1)cc(-c1ccc(/C=N/NC(=N)N)cc1)[n+]2C.[Br-]		1	0	14.8762	40.76	16.4453	14.8762	N#Cc1cccc(Cc2nc(-c3ccc(F)cc3)c(-c3ccnc(NC4CC4)n3)[nH]2)c1	520437		1	0	2.8104	8.4596	3.303	2.8104	CNc1nc(C)c(-c2nc(Nc3cccc(S(N)(=O)=O)c3)ncc2F)s1	2347597
CHEMBL104827	64	104827	6.6761	18.5193	6.5253	20.7392	O=S(=O)(NCCCCc1c[nH]cn1)NCc1ccc(Br)cc1		1	0	15.0285	40.6506	16.6834	15.0285	c1cc2c3c(cnc2[nH]1)CCCN3C1CCCCC1	2322140		1	0	2.7852	8.0485	3.3773	2.7852	CNc1nc(C)c(-c2nc(Nc3cccc(N4CCNCC4)c3)ncc2F)s1	2348647
CHEMBL104847	64	104847	10.324	28.4616	11.4436	32.3667	Br.C[n+]1c(-c2ccc(/C=N/NC3=NCCN3)cc2)c(Br)n2ccccc21.[Br-]		1	0	14.8929	40.6932	16.4271	14.8929	CC(C)(C)C1Nc2ccccc2-c2ccnc3[nH]cc1c23	595396		1	0	2.6755	8.0315	3.1892	2.6755	Cc1nc(N)sc1-c1ccnc(Nc2ccc(N(C)C)cc2)n1	295398
CHEMBL104855	64	104855	2.9359	7.9029	2.8269	8.89195	Br.C[n+]1c(-c2ccc(/C=N/NC(=N)N3CCCC3)cc2)cn2ccsc21.[Br-]		1	0	14.7174	41.1225	16.2508	14.7174	Cc1[nH]c(C#N)c(C)c1-c1ccnc(Nc2ccc(F)cc2)n1	185323		1	0	2.8619	8.0875	3.3462	2.8619	CNc1nc(C)c(-c2nc(Nc3cccc(N4CCNCC4)c3)ncc2C#N)s1	2348642
CHEMBL104890	64	104890	10.0118	27.3548	11.2641	31.2314	Br.CN1CCN(C(=N)N/N=C/c2ccc(-c3cn4ccccc4[n+]3C)cc2)CC1.[Br-]		1	0	14.7646	41.1442	16.2852	14.7646	c1ccc(-c2ncnc3[nH]ccc23)cc1	578974		1	0	2.7874	8.0645	3.383	2.7874	CCNc1nc(C)c(-c2ccnc(Nc3ccc(N4CCNCC4)cc3)n2)s1	1242995
CHEMBL104975	64	104975	12.5438	39.0705	16.2524	44.1361	C[n+]1c(-c2ccc(C(=N)N)cc2)cn2ccccc21.Cl.[Cl-]		1	0	14.8667	41.1259	16.3514	14.8667	c1ccc2c(c1)NCc1c[nH]c3nccc-2c13	595305		1	0	2.8556	8.0808	3.3327	2.8556	CNc1nc(C)c(-c2nc(Nc3cccc(N4CCCCC4)c3)ncc2C#N)s1	2348645
CHEMBL104990	64	104990	7.1071	19.7104	7.7613	22.3439	Br.C/N=C(/N/N=C/c1ccc(-c2cn3ccccc3[n+]2C)cc1)SC.[Br-]		1	0	14.8831	41.3992	16.4709	14.8831	Cc1cc(Nc2nccc(-c3c(C)[nH]c(C#N)c3C)n2)ccc1F	185310		1	0	2.8182	8.4739	3.3173	2.8182	CNc1nc(C(F)(F)F)c(-c2ccnc(Nc3cccc(S(N)(=O)=O)c3)n2)s1	2348842
CHEMBL105003	64	105003	2.9168	7.8616	2.7955	8.83896	CN(C)C(=N)N/N=C/c1ccc(-c2cn3ccsc3[n+]2C)cc1.I.[I-]		1	0	15.0738	41.3623	16.58	15.0738	Nc1ccc2c(-c3ccncc3)c(-c3ccc(F)cc3)[nH]c2n1	112273		1	0	2.9212	8.4862	3.342	2.9212	c1ccc(-c2ccc(-c3cn4c5c(sc4n3)CCCC5)cc2)cc1	196846
CHEMBL105034	64	105034	5.7998	15.7694	6.2187	17.916	Cc1ccc(S(=O)(=O)O)cc1.Cc1ccc(S(=O)(=O)[O-])cc1.Cc1ccn2cc(-c3ccc(/C=N/NC(=N)N)cc3)[n+](C)c2c1		1	0	15.0237	41.1559	16.632	15.0237	N#Cc1cc(-c2c[nH]c3ncccc23)cc(NCc2ccccc2)n1	2322674		1	0	2.7787	8.0507	3.3746	2.7787	Cc1cncn1CCCNC(=S)Nc1ccc2scnc2c1	2392787
CHEMBL105161	64	105161	6.7956	18.4222	6.7053	20.7489	O=S(=O)(NCCCCc1c[nH]cn1)NCc1ccc(-c2ccccc2)cc1		1	0	15.0603	41.3506	16.5812	15.0603	Nc1ccc2c(-c3ccncc3)c(-c3ccc(F)c(F)c3)[nH]c2n1	112274		1	0	2.9331	8.502	3.3595	2.9331	CNc1nc(C)c(-c2nc(Nc3ccc(S(N)(=O)=O)cc3)ncc2C#N)s1	2312187
CHEMBL105170	64	105170	10.0258	27.6764	11.1201	31.4668	Br.Cc1ccn2cc(-c3ccc(/C=N/NC4=NCCCN4)cc3)[n+](C)c2c1.[Br-]		1	0	15.1315	41.3087	16.6827	15.1315	Cc1cc(-c2c[nH]c3ncccc23)cc(NCc2ccccc2)n1	2322680		1	0	2.9297	8.4738	3.3467	2.9297	CNc1nc(C)c(-c2nc(Nc3cccc(S(N)(=O)=O)c3)ncc2C#N)s1	2312183
CHEMBL105202	64	105202	5.792	15.7407	6.225	17.8904	Cc1ccc(S(=O)(=O)O)cc1.Cc1ccc(S(=O)(=O)[O-])cc1.Cc1ccc2n(c1)cc(-c1ccc(/C=C/C=N/NC(=N)N)cc1)[n+]2C		1	0	15.0367	41.0902	16.5855	15.0367	Fc1cccc(-c2ccnc3[nH]c(C4=CCNCC4)cc23)n1	3673495		1	0	2.793	8.448	3.2868	2.793	Cc1nc(N)sc1-c1nc(Nc2cccc(S(N)(=O)=O)c2)ncc1F	3087448
CHEMBL105361	64	105361	10.043	27.7527	11.2156	31.5732	Br.Cc1ccn2cc(-c3ccc(/C=N/NC(=N)N4CCCC4)cc3)[n+](C)c2c1.[Br-]		1	0	15.2953	41.7579	16.9308	15.2953	CCc1ccccc1-c1cnc2[nH]cc(-c3ccnc(N)n3)c2c1	4085794		1	0	2.7852	8.0485	3.3773	2.7852	CNc1nc(C)c(-c2nc(Nc3cccc(N4CCNCC4)c3)ncc2F)s1	2348647
CHEMBL105387	64	105387	5.1754	14.1648	5.4912	16.0493	Br.CCCCSc1ccc2n(c1)cc(-c1ccc(/C=N/NC(=N)NO)cc1)[n+]2C.[Br-]		1	0	15.2602	41.7614	16.9967	15.2602	c1ccc(CCNc2nccc(-c3c[nH]c4ncccc34)n2)cc1	4098661		1	0	2.8448	8.5041	3.3266	2.8448	CNc1nc(CC(F)(F)F)c(-c2ccnc(Nc3cccc(S(N)(=O)=O)c3)n2)s1	2348841
CHEMBL105394	64	105394	9.905	27.6086	10.8417	31.2712	Br.CCN(CC)C(=N)N/N=C/c1ccc(-c2cn3ccccc3[n+]2C)cc1.[Br-]		1	0	15.2126	41.7293	16.8727	15.2126	Nc1nccc(-c2c[nH]c3ncc(-c4ccc(C(F)(F)F)cc4)cc23)n1	4067806		1	0	2.8683	8.0998	3.3438	2.8683	CNc1nc(C)c(-c2nc(Nc3ccc(N4CCNCC4)cc3)ncc2C#N)s1	2348644
CHEMBL105463	64	105463	5.5433	15.0206	5.9603	17.0843	Cc1ccc(S(=O)(=O)O)cc1.Cc1ccc(S(=O)(=O)[O-])cc1.Cc1ccc2n(c1)cc(-c1ccc(/C=N/NC(=N)N3CCSC3)cc1)[n+]2C		1	0	15.1557	41.5504	16.8411	15.1557	FC(F)(F)c1ccccc1CNc1nccc(-c2c[nH]c3ncccc23)n1	1999153		1	0	2.8169	8.4637	3.3227	2.8169	CNc1nc(C)c(-c2ccnc(Nc3cccc(S(N)(=O)=O)c3)n2)s1	2347595
CHEMBL105472	64	105472	5.4544	14.8926	5.9166	16.9277	CCSc1ccc2n(c1)cc(-c1ccc(/C=N/Nc3nc(N)nc(N)n3)cc1)[n+]2C.Cc1ccc(S(=O)(=O)[O-])cc1		1	0	15.3676	41.5877	16.996	15.3676	CN1Cc2c(C3=CCNCC3)[nH]c3nccc(c23)-c2cccnc21	3970239		1	0	3.0058	8.2889	3.0728	3.0058	Nc1nccc(/C=C/c2c(-c3ccccc3)nc3sccn23)n1	497114
CHEMBL105476	64	105476	9.8808	27.6655	10.7651	31.2873	Br.C[n+]1c(-c2ccc(/C=N/NC3=NCCN3)cc2)cn2c1CCCC2.[Br-]		1	0	15.2963	41.5679	17.0411	15.2963	c1ccc2c(c1)NC(c1ccncc1)c1c[nH]c3nccc-2c13	602788		1	0	3.0259	8.3029	3.0917	3.0259	Nc1nccc(/C=C/c2c(-c3ccc(F)cc3)nc3sccn23)n1	524799
CHEMBL105502	64	105502	5.4418	14.8692	5.8416	16.8769	CCSc1ccc2n(c1)cc(-c1ccc(/C=N/NC(=N)N)cc1)[n+]2C.Cc1ccc(S(=O)(=O)O)cc1.Cc1ccc(S(=O)(=O)[O-])cc1		1	0	15.1826	41.7831	16.9243	15.1826	c1ccc(CNc2cc(-c3c[nH]c4ncccc34)ncn2)cc1	2002346		1	0	2.9837	8.4537	2.8634	2.9837	O=[N+]([O-])c1cccc(-c2nc3sccn3c2-c2ccnc(Nc3ccccc3)n2)c1	1093235
CHEMBL105512	64	105512	1.1945	5.9018	2.2028	6.41174	CCCN(CCC)C1CCc2nc(N)sc2C1		1	0	15.3469	41.7699	17.0056	15.3469	N#Cc1ccc2c(c1)CCN2[C@@H]1CCN(c2ncnc3[nH]ccc23)C1	3932349		1	0	3.0053	8.2901	2.9845	3.0053	Fc1ccc(-c2nc3sccn3c2-c2ccncc2)cc1	2000508
CHEMBL105575	64	105575	10.0118	27.3548	11.2641	31.2314	Br.Cc1ccn2cc(-c3ccc(/C=N/NC(=N)N4CCN(C)CC4)cc3)[n+](C)c2c1.[Br-]		1	0	15.4145	42.0105	17.0375	15.4145	Cc1cccc(CNc2cc(-c3c[nH]c4ncccc34)ncn2)c1	1995932		1	0	3.0149	8.2893	3.0729	3.0149	CNc1nccc(/C=C/c2c(-c3ccccc3)nc3sccn23)n1	497290
CHEMBL105586	64	105586	5.2049	14.1179	5.5635	16.0424	Br.CCCSc1ccc2n(c1)cc(-c1ccc(/C=N/NC(=N)N3CCCC3)cc1)[n+]2C.[Br-]		1	0	15.3463	42.0345	16.9416	15.3463	Cc1cccc(-c2cnc3[nH]cc(-c4ccnc(N)n4)c3c2)c1	4098589		1	0	3.0995	8.369	2.9679	3.0995	Cl.N=C(N)N/N=C/c1c(-c2ccc(N)cc2)nc2sccn12	1910628
CHEMBL105709	64	105709	9.8853	27.7719	10.9862	31.4594	Br.Cc1ccc2n(c1)cc(/C=C/c1ccc(/C=N/NC(=N)NO)cc1)[n+]2C.[Br-]		1	0	15.2765	41.8364	16.889	15.2765	Nc1nccc(-c2c[nH]c3ncc(-c4cccc(C(F)(F)F)c4)cc23)n1	4077931		1	0	3.466	8.5263	3.0151	3.466	Cc1cc(C)cc(Nc2nccc(-c3nccs3)n2)c1	509161
CHEMBL105734	64	105734	6.7915	18.438	6.6986	20.7595	O=S(=O)(Cc1ccc(F)cc1)NCCCCc1c[nH]cn1		1	0	15.2279	41.8442	16.9187	15.2279	Nc1nccc(-c2c[nH]c3ncc(-c4cccc(F)c4)cc23)n1	4071557		1	0	3.5069	8.489	3.0193	3.5069	Cc1nc(C)c(-c2ccnc(Nc3cccc(C#N)c3)n2)s1	47132
CHEMBL105744	64	105744	6.7774	18.4729	6.6333	20.7649	O=S(=O)(NCCCCc1c[nH]cn1)NCc1ccc(C(F)(F)F)cc1		1	0	15.3198	41.8546	16.945	15.3198	FC(F)(F)c1cccc(CNc2cc(-c3c[nH]c4ncccc34)ncn2)c1	1966040		1	0	3.5097	8.4891	3.0242	3.5097	CCCNc1ncc(-c2cc(-c3ccccc3F)nc(C)n2)s1	1257953
CHEMBL105751	64	105751	10.0283	27.7805	11.0622	31.5388	Br.CCCC/N=C(/NCCCC)N/N=C/c1ccc(-c2cn3ccc(C)cc3[n+]2C)cc1.[Br-]		1	0	15.3338	41.8942	17.0112	15.3338	CCc1cc(-c2c[nH]c3ncc(-c4ccccc4)cc23)nc(N)n1	3813962		1	0	3.5007	8.5217	2.9772	3.5007	Cc1nc(C)c(-c2ccnc(Nc3ccc(C(F)(F)F)cc3)n2)s1	48109
CHEMBL105766	64	105766	5.5054	15.8095	5.9689	17.7729	Cc1cncc(-c2nc(C(F)(F)F)cn2-c2ccc(S(N)(=O)=O)cc2)c1		1	0	15.2279	41.8442	16.9187	15.2279	Nc1nccc(-c2c[nH]c3ncc(-c4cccc(F)c4)cc23)n1	4071557		1	0	3.4564	8.4924	3.0186	3.4564	Nc1nc2c(s1)-c1nc(Nc3ccccc3)ncc1CC2	599804
CHEMBL105973	64	105973	5.498	13.6899	6.2482	16.0213	Cc1ccccc1Sc1nc(N)nc2c1ncn2CCOCP(=O)(OCC(F)(F)F)OCC(F)(F)F		1	0	15.359	41.9896	17.1005	15.359	CC(C)(Nc1nccc(-c2c[nH]c3ncccc23)n1)c1ccccc1	1999279		1	0	3.5034	8.5591	3.0255	3.5034	Cc1cc(Nc2nccc(-c3nccs3)n2)cc(C(F)(F)F)c1	471776
CHEMBL106018	64	106018	10.043	27.7527	11.2156	31.5732	Br.Cc1c(-c2ccc(/C=N/NC(=N)N3CCCC3)cc2)[n+](C)c2ccccn12.[Br-]		1	0	15.5252	41.7995	17.1381	15.5252	Cc1c[nH]c2ncnc(N3CC4(CCNCC4)c4ccccc43)c12	259163		1	0	3.4959	8.4577	3.0464	3.4959	CCCNc1ncc(-c2cc(-c3ccccc3F)nc(C3CC3)n2)s1	1257954
CHEMBL106023	64	106023	5.3559	15.8189	5.7066	17.649	NS(=O)(=O)c1ccc(-n2cc(C(F)(F)F)nc2-c2cncc(Br)c2)cc1		1	0	15.7095	42.3172	17.3446	15.7095	c1ccc2c(c1)N(c1ncnc3[nH]ccc13)CC21CCNCC1	259265		1	0	3.4642	8.4709	3.0276	3.4642	Cc1cc(C)cc(Nc2nccc(-c3nc(C)cs3)n2)c1	453217
CHEMBL106028	64	106028	0.8202	5.5764	2.1394	6.02876	CCN1CCC=C(c2csc(N)n2)C1		1	0	15.5744	42.587	17.1947	15.5744	CN1Cc2c(C3=CCCNCC3)[nH]c3nccc(c23)-c2cc(F)ccc21	3942621		1	0	3.448	8.5009	3.0205	3.448	Cc1ccc(C)c(Nc2nccc(-c3nccs3)n2)c1	475570
CHEMBL106152	64	106152	5.5169	13.7247	6.2476	16.0573	Nc1nc(Sc2ccc3ccccc3c2)c2ncn(CCOCP(=O)(OCC(F)(F)F)OCC(F)(F)F)c2n1		49	0	13.9592	38.7144	15.4555	13.9592	CC(C)(C)Nc1ncnc2[nH]cc(-c3ccccc3)c12	1995211		1	0	3.4774	8.5277	2.9936	3.4774	NC(Cc1ccc(F)cc1)c1csc(Nc2nccc(C(F)(F)F)n2)n1	1878414
CHEMBL106192	64	106192	5.3925	14.8068	5.5102	16.6938	CS(=O)(=O)c1ccc(-n2cc(C(F)(F)F)nc2-c2nccc3ccccc23)cc1		49	0	14.0434	38.5634	15.7052	14.0434	c1cnc2[nH]cc(Cc3c[nH]c4ncccc34)c2c1	4105236		1	0	3.4748	8.5104	3.0341	3.4748	Cc1cc(C)cc(Nc2nccc(-c3ncc(C)s3)n2)c1	470780
CHEMBL106257	64	106257	0.8264	5.5476	2.1572	6.00935	C=CCN1CCC=C(c2csc(N)n2)C1		49	0	14.3118	38.5196	15.8736	14.3118	c1ccc(-c2c[nH]c3ncnc(N4CCCCC4)c23)cc1	1998953		1	0	3.4826	8.5159	3.028	3.4826	Cc1nc2c(s1)-c1nc(Nc3ccccc3)ncc1CC2	601705
CHEMBL106304	1	106304	14.7061	44.8112	19.0883	50.879	Cc1cccc(C)c1Nc1nc2cccc(N)c2n2cncc12		49	0	14.8326	41.2086	16.3397	14.8326	Cc1cc(-c2ncnc3[nH]ccc23)ccc1F	1997041		1	0	3.479	8.4349	3.108	3.479	CN(C)c1ccc(Nc2ncc3c(n2)-c2sc(N)nc2CC3)cc1	598166
CHEMBL106305	64	106305	0.8439	5.5579	2.1722	6.02668	CCCCCCCN1CCC=C(c2csc(N)n2)C1		63	0	14.1131	39.2431	15.6149	14.1131	CCCNCc1ccc(-c2cc(N)nc3[nH]ccc23)cc1	3484721		1	0	3.4213	8.5182	3.0237	3.4213	c1ccc2cc(Nc3nccc(-c4nccs4)n3)ccc2c1	470716
CHEMBL106367	64	106367	5.5251	13.717	6.2279	16.0459	Cc1ccc(Sc2nc(N)nc3c2ncn3CCOCP(=O)(OCC(F)(F)F)OCC(F)(F)F)cc1		63	0	14.1387	39.4259	15.5859	14.1387	CNc1cc(-c2cccc(CN)c2)c2cc[nH]c2n1	3484281		1	0	3.5019	8.5111	3.0613	3.5019	OCCCn1c(C2CCCN2c2nc(-c3ccc(F)cc3)cs2)nc2cc(C(F)(F)F)ccc21	1307936
CHEMBL106477	64	106477	4.7642	13.1587	6.3015	15.3479	Nc1nc(Sc2ccccc2)c2ncn(CCOCP(=O)(OCC(F)(F)F)OCC(F)(F)F)c2n1											1	0	3.5067	8.5632	3.0001	3.5067	Cc1nc(NC2CCCC2)sc1-c1ccnc(Nc2ccc(N3CCC(N)CC3)cn2)n1	4061223
CHEMBL106658	64	106658	0.834	5.5696	2.1717	6.03592	CCCCN1CCC=C(c2csc(N)n2)C1											1	0	3.4916	8.5096	2.9738	3.4916	Cc1nc(C)c(-c2ccnc(Nc3cccc(C(F)(F)F)c3)n2)s1	47276
CHEMBL106753	64	106753	5.1602	14.0703	5.5183	15.9704	Br.CCSc1ccc2n(c1)cc(-c1ccc(/C=N/NC3=NCCN3)cc1)[n+]2C.[Br-]											1	0	3.5057	8.5	2.9912	3.5057	CCCNc1ncc(-c2cc(-c3ccccc3F)nc(N)n2)s1	1257952
CHEMBL107037	64	107037	0.8264	5.5244	2.1897	5.99973	CC(C)CCN1CCC=C(c2csc(N)n2)C1											1	0	3.1113	8.3308	3.1782	3.1113	CC(Nc1nccc(/C=C/c2c(-c3ccccc3)nc3sccn23)n1)c1ccccc1	502803
CHEMBL107117	64	107117	6.7743	18.412	6.7142	20.7358	O=S(=O)(Cc1ccc(C(F)(F)F)cc1)NCCCCc1c[nH]cn1											1	0	3.1485	8.41	3.2087	3.1485	C(=C/c1c(-c2ccccc2)nc2sccn12)\c1ccnc(Nc2ccccc2)n1	526932
CHEMBL107123	64	107123	6.8542	18.4183	6.7805	20.7892	O=S(=O)(Cc1ccc(-c2ccccc2)cc1)NCCCCc1c[nH]cn1											1	0	3.512	8.4685	3.1275	3.512	CCC(C)Nc1cc(-c2ccc3ncsc3c2)nc(C)n1	3728375
CHEMBL107249	64	107249	5.5176	13.7058	6.2247	16.0325	CCc1ccc(Sc2nc(N)nc3c2ncn3CCOCP(=O)(OCC(F)(F)F)OCC(F)(F)F)cc1											1	0	3.2871	8.5507	3.194	3.2871	Nc1nc2ccc(-c3c(-c4ccc(F)cc4)nc4sccn34)cc2n1CC1CC1	1982874
CHEMBL1075854	64	1075854	10.6867	32.6318	13.818	37.0132	Nc1nccc(-c2c(C(F)(F)F)nc3ccccn23)n1											1	0	3.5505	8.4787	3.1883	3.5505	CNc1nc(C)c(-c2ccnc(Nc3ccc(N4CCN(Cc5ccccc5)CC4)cc3)n2)s1	550950
CHEMBL107600	64	107600	4.3412	14.0691	5.5605	15.7386	CS(=O)(=O)c1ccc(-n2cc(C(F)(F)F)nc2-c2ccccn2)cc1											1	0	3.3838	8.8782	3.2954	3.3838	Cc1ccc(-c2nnc(-c3cccnc3)n2Nc2nc3ccc(Br)cc3s2)cc1	1243070
CHEMBL1076330	1	1076330	3.3123	10.4001	3.2116	11.3775	Cn1cnc(-c2ccccc2)c1-c1nc2c(N)ncnc2s1											1	0	3.5496	8.401	3.2176	3.5496	CNc1nc(C2CC2)c(-c2ccnc(Nc3cccc(N4CCCNCC4)c3)n2)s1	2348848
CHEMBL1077023	64	1077023	4.7527	12.7976	5.784	14.8264	CS(=O)(=O)N1CCN(Cc2cc3nc(-c4ccncc4)nc(N4CCOCC4)c3s2)CC1											1	0	3.2912	8.5753	3.1827	3.2912	CC(C)Cn1c(N)nc2c(F)cc(-c3c(-c4ccc(F)cc4)nc4sccn34)cc21	2004419
CHEMBL107726	64	107726	5.762	15.0624	5.5835	17.0661	CCS(=O)(=O)Nc1cccc2c1SCCC2c1c[nH]cn1											1	0	3.2894	8.5672	3.1853	3.2894	CC(C)Cn1c(N)nc2ccc(-c3c(-c4ccc(F)cc4)nc4sccn34)cc21	1965423
CHEMBL1077374	64	1077374	9.3837	26.602	10.0097	29.9318	Fc1ccc2c(c1)-c1ncnn1Cc1cncn1-2											1	0	3.5159	8.4935	3.1231	3.5159	Cc1cc(Nc2nccc(C3CC3)n2)cc(-c2cnc(C3(N)CCC3)s2)c1	3685824
CHEMBL1077387	64	1077387	7.8619	23.8059	9.1104	26.6745	c1cncc(-c2n[nH]c(-c3ccncc3)n2)c1											1	0	3.4909	8.4035	3.1845	3.4909	Cc1csc(Nc2nccc(-c3ccc(N4CCCC4)c(C#N)c3)n2)n1	3650715
CHEMBL1077580	49	1077580	10.8243	32.3749	13.2113	36.6038	N#C/N=C(/NCCCCc1c[nH]cn1)NCCCc1ccccn1											1	0	3.526	8.4687	3.1981	3.526	Cc1cnc(Nc2nccc(-c3ccc(N4CCCC4)c(C#N)c3)n2)s1	3650713
CHEMBL1077596	64	1077596	6.2849	16.7752	6.0563	18.9099	Cc1ccc(S(=O)(=O)NC(=N)NCCCc2c[nH]cn2)cc1											1	0	3.0934	9.005	2.9878	3.0934	O=S(=O)(Nc1ccc(-c2ccnc(Nc3ccc4ncsc4c3)n2)cc1)c1ccc2nonc2c1	402041
CHEMBL1077729	1	1077729	4.34	13.1533	3.9213	14.3952	FC(F)(F)c1ccc2[nH]c(Nc3ccc(CCNc4ncnc5ccsc45)cc3)nc2c1											1	0	3.2655	9.4818	2.9383	3.2655	Cc1csc(-c2nc[nH]c2-c2ccc3ncsc3c2)n1	2207988
CHEMBL1077761	64	1077761	3.7565	13.1507	5.2295	14.6424	N#C/N=C(\NCCCCCc1c[nH]cn1)NCCSc1ccccc1											1	0	3.2804	9.6134	2.9484	3.2804	Cc1csc(-c2nc(C(F)(F)F)[nH]c2-c2ccc3ncsc3c2)n1	2207996
CHEMBL1077859	49	1077859	13.264	38.5274	15.6372	43.6442	N#C/N=C(/NCCCCc1c[nH]cn1)NCCCc1ccncc1											1	0	3.3014	9.609	2.9552	3.3014	Cc1csc(-c2nc(C)[nH]c2-c2ccc3ncsc3c2)n1	2207989
CHEMBL1077955	1	1077955	4.9168	13.0637	5.3795	14.9591	c1cnc2[nH]c(Nc3ccc(CCNc4ncnc5ccsc45)cc3)nc2c1											1	0	3.3014	9.609	2.9552	3.3014	Cc1csc(-c2nc(C)[nH]c2-c2ccc3ncsc3c2)n1	2207989
CHEMBL1078061	1	1078061	4.3734	13.2089	3.9409	14.4614	Fc1cc(CCNc2ncnc3ccsc23)ccc1Nc1nc2cc(C(F)(F)F)ccc2[nH]1											1	0	3.1045	9.9905	3.469	3.1045	Cc1nc(-c2ccccn2)sc1-c1ccnc(Nc2cccc([N+](=O)[O-])c2)n1	409506
CHEMBL1078105	64	1078105	19.0123	56.5566	22.8676	63.8987	N#C/N=C(\NCCc1c[nH]cn1)NCCc1c[nH]c2ccccc12											1	0	3.6117	8.5366	3.432	3.6117	Cc1nc2c(s1)-c1nc(Nc3ccc(N4CCOCC4)cc3)ncc1CC2	598993
CHEMBL1078308	64	1078308	4.8931	13.9458	5.5427	15.7845	CSc1cc(-c2nc(-c3ccnc(C#N)c3)n[nH]2)ccn1											1	0	3.6491	8.5175	3.4141	3.6491	C#Cc1cccc(Nc2ncnc3nc(Nc4ccc(CN5CCOCC5)cc4)sc23)c1	470391
CHEMBL1078310	64	1078310	4.9272	13.9577	5.5785	15.8182	CC(C)CSc1cc(-c2nc(-c3ccnc(C#N)c3)n[nH]2)ccn1											1	0	3.7555	8.9486	3.2638	3.7555	CC(C)c1nc(-c2ccc(F)c(NS(=O)(=O)c3c(F)cccc3F)c2)c(-c2ccnc(NCCS(C)(=O)=O)n2)s1	2331621
CHEMBL1078311	64	1078311	8.9619	24.7058	9.2272	27.8538	N#Cc1cc(-c2n[nH]c(-c3ccnc(-c4ccccc4)c3)n2)ccn1											1	0	3.8053	8.9796	3.3289	3.8053	CC(C)c1nc(-c2cccc(NS(=O)(=O)c3cccc(F)c3)c2)c(-c2ccnc(NCCCN(C)C)n2)s1	2337914
CHEMBL1078327	1	1078327	4.3054	13.097	3.9368	14.3376	c1ccc2[nH]c(Nc3ccc(CNc4ncnc5ccsc45)cc3)nc2c1											1	0	3.7395	8.9392	3.2469	3.7395	CC(C)c1nc(-c2cccc(NS(=O)(=O)c3c(F)cccc3F)c2)c(-c2ccnc(N)n2)s1	2337909
CHEMBL107842	64	107842	5.5054	13.6844	6.2274	16.011	CC(C)c1ccc(Sc2nc(N)nc3c2ncn3CCOCP(=O)(OCC(F)(F)F)OCC(F)(F)F)cc1											1	0	3.7794	8.9811	3.3196	3.7794	CCc1nc2ccccc2n1-c1nc(N2CCOCC2)c2nc(CN3CCC(C(C)(C)O)CC3)sc2n1	2171946
CHEMBL1078472	64	1078472	4.1684	12.6803	3.9323	13.915	Brc1ccc2c(c1)-c1ncnn1Cc1c(-c3cccs3)ncn1-2											1	0	3.7558	8.9649	3.3402	3.7558	CC(C)c1nc(-c2cccc(NS(=O)(=O)c3ccccc3)c2)c(-c2ccnc(Nc3ccc4c(c3)CN(C)CC4)n2)s1	1807710
CHEMBL1078473	64	1078473	10.5919	28.9775	11.3413	32.8711	Cn1nccc1-c1ncn2c1Cn1ncnc1-c1cc(Br)ccc1-2											1	0	3.7735	9.0001	3.2837	3.7735	CC(C)(C)c1nc(-c2cccc(NS(=O)(=O)c3cc(F)ccc3F)c2)c(-c2ccnc(N)n2)s1	2337910
CHEMBL1078529	49	1078529	3.7526	13.1198	5.2078	14.6059	N#C/N=C(/NCCCc1c[nH]cn1)NCCSc1ccccc1											1	0	3.7555	8.9486	3.2638	3.7555	CC(C)c1nc(-c2ccc(F)c(NS(=O)(=O)c3c(F)cccc3F)c2)c(-c2ccnc(NCCS(C)(=O)=O)n2)s1	2331621
CHEMBL1078560	64	1078560	8.3412	24.3464	9.5497	27.4503	N#Cc1cc(-c2n[nH]c(-c3ccnc(C#N)c3)n2)ccn1											1	0	3.7475	8.9367	3.2597	3.7475	CC(C)(C)c1nc(-c2cccc(NS(=O)(=O)c3c(F)cccc3F)c2F)c(-c2ccnc(N)n2)s1	2028663
CHEMBL1078642	49	1078642	3.7494	13.1005	5.2022	14.5857	N#C/N=C(/NCCCCc1c[nH]cn1)NCCSc1ccccc1											1	0	3.7555	8.9486	3.2638	3.7555	CC(C)c1nc(-c2ccc(F)c(NS(=O)(=O)c3c(F)cccc3F)c2)c(-c2ccnc(NCCS(C)(=O)=O)n2)s1	2331621
CHEMBL1078685	64	1078685	8.3244	24.4109	9.4764	27.4771	N#Cc1cc(-c2n[nH]c(-c3ccncc3)n2)ccn1											1	0	3.7651	9.0022	3.2715	3.7651	CC(C)c1nc(-c2ccc(F)c(NS(=O)(=O)c3cccc(F)c3)c2)c(-c2ccnc(N)n2)s1	2337911
CHEMBL1078747	64	1078747	6.7845	18.3976	6.6861	20.7173	N=C(NCCCc1c[nH]cn1)NS(=O)(=O)CCc1ccccc1											1	0	3.7487	8.9488	3.2549	3.7487	CC(C)(C)c1nc(-c2ccc(F)c(NS(=O)(=O)c3c(F)cccc3F)c2)c(-c2ccnc(NCCS(C)(=O)=O)n2)s1	2337917
CHEMBL1078761	64	1078761	9.7108	28.4477	11.0352	32.021	Brc1cc(-c2n[nH]c(-c3ccncc3)n2)ccn1											1	0	3.7321	8.9001	3.2254	3.7321	Cc1cc(Nc2nccc(C(F)(F)F)n2)cc(-c2cnc(CNCCS(N)(=O)=O)s2)c1	3685813
CHEMBL1078762	64	1078762	7.8391	23.8185	9.0807	26.6689	Fc1cc(-c2n[nH]c(-c3ccncc3)n2)ccn1											1	0	3.7562	8.9504	3.2483	3.7562	CNc1nc(C2CC2)c(-c2ccnc(Nc3ccc(S(N)(=O)=O)cc3)n2)s1	2348847
CHEMBL1078763	64	1078763	8.9111	24.6534	9.1821	27.776	c1ccc(-c2cc(-c3n[nH]c(-c4ccncc4)n3)ccn2)cc1											1	0	3.8283	9.1974	3.3556	3.8283	O=S(=O)(c1ccccc1)c1ccc(-c2ccnc(Nc3ccc4ncsc4c3)n2)cc1	256148
CHEMBL1078827	1	1078827	3.2644	9.8345	4.2363	11.1946	c1ccc2[nH]c(Nc3ncc(CCNc4ncnc5ccsc45)s3)nc2c1											1	0	3.8597	9.2503	3.4106	3.8597	Cc1ccc(S(=O)(=O)Nc2ccc(-c3ccnc(Nc4ccc5ncsc5c4)n3)cc2)cc1	256940
CHEMBL1078828	1	1078828	4.0887	10.4032	4.1398	11.9198	FC(F)(F)c1ccc2nc(Nc3ncc(CCNc4ncnc5ccsc45)s3)[nH]c2c1											1	0	3.9431	9.2754	3.46	3.9431	O=S(=O)(c1ccc(-c2ccnc(Nc3ccc4ncsc4c3)n2)cc1)N1CCSCC1	257402
CHEMBL1078906	1	1078906	4.3122	13.1066	3.9098	14.341	c1ccc2[nH]c(Nc3ccc(CCNc4ncnc5ccsc45)cc3)nc2c1											1	0	2.9174	8.125	3.603	2.9174	CNc1nc(C)c(-c2ccnc(Nc3ccc(N4CCOCC4)cc3)n2)s1	1084629
CHEMBL1078926	1	1078926	4.3049	13.1124	3.943	14.3532	c1cc(CNc2ncnc3ccsc23)cc(Nc2nc3ccccc3[nH]2)c1											1	0	2.9174	8.125	3.603	2.9174	CNc1nc(C)c(-c2ccnc(Nc3ccc(N4CCOCC4)cc3)n2)s1	1084629
CHEMBL1078978	64	1078978	7.8051	23.7233	9.055	26.5652	c1cc(-c2n[nH]c(-c3ccncc3)n2)ccn1											1	0	2.9154	8.1276	3.5966	2.9154	Cc1nc(C)c(-c2ccnc(Nc3ccc(N4CCOCC4)cc3)n2)s1	1085626
CHEMBL1078979	64	1078979	8.2908	24.5063	9.6132	27.5991	c1ccc(-c2n[nH]c(-c3ccncc3)n2)nc1											1	0	2.9145	8.125	3.5989	2.9145	Cc1nc(N)sc1-c1ccnc(Nc2ccc(N3CCOCC3)cc2)n1	482967
CHEMBL1078980	64	1078980	8.2641	24.312	9.4982	27.3785	Cc1cc(-c2nc(-c3ccncc3)n[nH]2)ccn1											1	0	2.9211	8.1354	3.5967	2.9211	CNc1nc(C)c(-c2nc(Nc3cccc(N4CCOCC4)c3)ncc2F)s1	2348648
CHEMBL1079001	64	1079001	8.2845	24.2976	9.5432	27.3876	Cc1cc(-c2n[nH]c(-c3ccnc(C)c3)n2)ccn1											1	0	2.8907	8.299	3.4871	2.8907	Cc1nc(C)c(-c2ccnc(Nc3ccc(N4CCN(S(C)(=O)=O)CC4)cc3)n2)s1	1083484
CHEMBL1079051	1	1079051	4.9202	12.9958	5.3449	14.8885	c1cc2nc(Nc3ccc(CCNc4ncnc5ccsc45)cc3)[nH]c2cn1											1	0	2.927	9.2505	3.7344	2.927	Nc1n[nH]c(NCc2ncc[nH]2)c1-c1nc2ccccc2s1	3685698
CHEMBL1079084	64	1079084	8.3098	24.3591	9.5123	27.4391	N#Cc1ccc(-c2n[nH]c(-c3ccncc3)n2)cn1											1	0	2.9267	9.2681	3.7546	2.9267	c1ccc2sc(-c3cn[nH]c3NCCc3cnc[nH]3)nc2c1	3680986
CHEMBL1079185	49	1079185	6.3256	16.4641	6.1213	18.6695	CCCCc1ccc(S(=O)(=O)Nc2ccc3c(c2)CCN(Cc2cnc[nH]2)CC3)cc1											1	0	2.9386	9.199	3.7775	2.9386	Nc1n[nH]c(NCCCn2ccnc2)c1-c1nc2ccccc2s1	3685705
CHEMBL1079187	49	1079187	6.3127	16.4014	6.1441	18.6174	CCCCc1ccc(S(=O)(=O)Nc2ccc3c(c2)CCN(Cc2cnc(C)[nH]2)CC3)cc1											1	0	2.927	9.2505	3.7344	2.927	Nc1n[nH]c(NCc2ncc[nH]2)c1-c1nc2ccccc2s1	3685698
CHEMBL1079428	1	1079428	3.9082	12.2246	3.7859	13.3809	Cn1cnc(-c2ccccc2)c1-c1cc2c(N)ncnc2s1											1	0	3.0904	8.4379	3.7089	3.0904	CNc1nc(C)c(-c2nc(Nc3cccc(S(=O)(=O)N4CCOCC4)c3)ncc2C#N)s1	3087441
CHEMBL1079429	1	1079429	3.945	12.3665	3.7296	13.5057	Cc1ccc(Sc2cccc(-c3ncn(C)c3-c3cc4c(N)ncnc4s3)c2)cc1											1	0	3.0766	8.6145	3.5021	3.0766	CS(=O)(=O)c1ccc2nc(NC(=O)NCc3nc4ccccc4[nH]3)sc2c1	237837
CHEMBL1079475	64	1079475	7.3033	20.6145	8.3524	23.4106	Cn1c(SCCCN2C[C@@H]3C[C@]3(c3ccc(C(F)(F)F)cc3)C2)nnc1-c1cncnc1											1	0	3.0821	8.5052	3.7691	3.0821	NS(=O)(=O)c1ccc(Nc2nc3ncnc(Nc4ccc(N5CCOCC5)cc4)c3s2)cc1	511449
CHEMBL1079480	64	1079480	7.5228	20.8307	8.2733	23.6423	Cc1cnc(-c2nnc(SCCCN3C[C@@H]4C[C@]4(c4ccc(C(F)(F)F)cc4)C3)n2C)cn1											1	0	3.0836	8.3236	3.7749	3.0836	CNc1nc(C)c(-c2nc(Nc3cccc(S(=O)(=O)NCCOC)c3)ncc2C#N)s1	3087443
CHEMBL1079538	1	1079538	4.9331	13.1031	5.4039	15.0076	FC(F)(F)c1cnc2[nH]c(Nc3ccc(CCNc4ncnc5ccsc45)cc3)nc2c1											1	0	3.1141	8.49	3.7373	3.1141	CNc1nc(C)c(-c2nc(Nc3ccc(S(=O)(=O)N4CCOCC4)cc3)ncc2C#N)s1	2312186
CHEMBL1079585	64	1079585	5.5517	13.1656	5.6427	15.3621	Nc1nc(OCC2CCN(c3cc(-c4cc5ccccc5s4)ncn3)CC2)ncc1F											1	0	3.0851	8.4325	3.8453	3.0851	CNc1nc(C)c(-c2nc(Nc3cccc(S(=O)(=O)NCCOC)c3)ncc2F)s1	3087442
CHEMBL1079588	1	1079588	3.3103	10.4484	3.1805	11.4124	CCn1cnc(-c2ccccc2)c1-c1nc2c(N)ncnc2s1											1	0	3.1015	9.0859	3.6168	3.1015	CNc1nccc(C(C#N)c2nc3ccccc3s2)n1	399168
CHEMBL1079589	1	1079589	3.2464	10.3434	3.0478	11.2612	Nc1ncnc2sc(-c3c(-c4ccccc4)ncn3CC3CCCCC3)nc12											1	0	3.0816	9.093	3.548	3.0816	N#CC(c1nc2ccccc2s1)c1nc(Cl)ncc1Br	1983954
CHEMBL1079590	1	1079590	3.2878	10.4094	3.1238	11.3544	CC(C)Cn1cnc(-c2ccccc2)c1-c1nc2c(N)ncnc2s1											1	0	3.1238	9.1298	3.6141	3.1238	COc1nccc(C(C#N)c2nc3ccccc3s2)n1	3947134
CHEMBL1079640	64	1079640	7.4672	20.9918	8.3479	23.7929	Cc1ccc(-c2nnc(SCCCN3C[C@@H]4C[C@]4(c4ccc(C(F)(F)F)cc4)C3)n2C)cn1											1	0	3.0553	9.0816	3.7209	3.0553	N#CC(c1ccnc(NCCc2c[nH]cn2)n1)c1nc2ccccc2s1	254651
CHEMBL1079773	1	1079773	4.0695	10.3468	4.4645	11.9812	Nc1ncnc2sc(-c3c(-c4ccccc4)ncn3Cc3ccccc3N3CCOCC3)nc12											1	0	3.0784	9.0676	3.5777	3.0784	CSc1nccc(C(C#N)c2nc3ccccc3s2)n1	3911431
CHEMBL1079858	64	1079858	13.7959	41.0535	17.3794	46.6665	FC(F)(F)c1ccc(Nc2nccc(-c3c(C(F)(F)F)nc4ccccn34)n2)cc1											1	0	3.133	9.1627	3.7655	3.133	c1ccc(-c2ccnc(Nc3ccc4ncsc4c3)n2)nc1	3643773
CHEMBL1079868	49	1079868	6.1253	16.2779	5.9933	18.3959	CCCCc1ccc(S(=O)(=O)Nc2ccc3c(c2)CCN(Cc2cncn2C)CC3)cc1											1	0	3.1654	9.2132	3.8097	3.1654	CSc1ccc(CNC(c2ccc(F)cc2)c2nccn2C)cc1	3488767
CHEMBL1080056	64	1080056	4.8603	13.9339	5.5073	15.7514	CSc1cc(-c2nc(-c3ccnc(C)c3)n[nH]2)ccn1											1	0	3.53	9.4988	3.667	3.53	c1cn(-c2ccc(-c3ccnc(Nc4ccc5ncsc5c4)n3)cc2)cn1	428424
CHEMBL1080057	64	1080057	8.904	24.6466	9.1877	27.7696	Cc1cc(-c2n[nH]c(-c3ccnc(-c4ccccc4)c3)n2)ccn1											1	0	3.4077	9.5063	3.7821	3.4077	CC(C)Nc1cc(Nc2ccc3ncsc3c2)ncc1-c1nnc[nH]1	3898966
CHEMBL1080059	64	1080059	4.8941	13.9451	5.5441	15.7846	Cc1cc(-c2n[nH]c(-c3ccnc(SCC(C)C)c3)n2)ccn1											1	0	3.113	9.103	3.8294	3.113	N#CC(c1ccnc(NC2Cc3c[nH]c2n3)n1)c1nc2ccccc2s1	3909478
CHEMBL1080344	64	1080344	13.8084	41.0408	17.3581	46.6511	Cc1ccc(Nc2nccc(-c3c(C(F)(F)F)nc4ccccn34)n2)cc1											1	0	3.2034	9.4738	3.8675	3.2034	Cc1[nH]nc(N)c1-c1nc2ccc(S(=O)(=O)NCCc3cnc[nH]3)cc2s1	3681025
CHEMBL1080551	64	1080551	13.9017	42.4324	17.7441	48.0481	Cc1cccc(C)c1CNc1cccn2c(C)ncc12											1	0	3.3488	9.4865	3.9375	3.3488	Cc1nc2ccc(Nc3c(C)c(N[C@H]4CCCNC4)nc4ccnn34)cc2s1	2163608
CHEMBL1080718	64	1080718	9.1566	25.1491	9.634	28.4453	Cc1cccc(C)c1CNc1cccn2c(C)nnc12											1	0	3.4962	9.4614	4.1625	3.4962	Cc1nc(N)nc(-c2cc(CN3CCOCC3)cnc2Nc2ccc3scnc3c2)n1	3646469
CHEMBL1080719	64	1080719	9.509	25.7869	10.139	29.2948	Cc1cccc(C)c1CNc1ccnn2c(C)c(C)nc12											1	0	3.4929	9.5654	4.0633	3.4929	Cc1nc(N)nc(-c2cc(C(C)N3CCN(S(C)(=O)=O)CC3)cnc2Nc2ccc3scnc3c2)n1	3646582
CHEMBL1080767	64	1080767	8.3488	24.3955	9.5322	27.4901	Cc1cc(-c2n[nH]c(-c3ccnc(C#N)c3)n2)ccn1											1	0	3.5258	9.6717	4.1013	3.5258	Cc1nc(N)nc(-c2cc(CN3CCN(S(C)(=O)=O)CC3)cnc2Nc2ccc3ncsc3c2)n1	3646547
CHEMBL1080773	64	1080773	3.7239	13.0663	5.1906	14.5443	N#C/N=C(\NCCSc1ccccc1)NCCc1c[nH]cn1											1	0	3.4995	9.4538	4.1466	3.4995	Cc1nc(N)nc(-c2cc(C(C)N3CCOCC3)cnc2Nc2ccc3scnc3c2)n1	3646580
CHEMBL1080872	1	1080872	5.715	15.5704	6.2097	17.7104	O=S(=O)(Nc1cccc(-c2cn3ccnc3c(NCc3ccncc3)n2)c1)c1cccc(C(F)(F)F)c1											1	0	3.4771	9.5695	4.0688	3.4771	Cc1nc(N)nc(-c2cc(CN3CCN(S(C)(=O)=O)CC3)cnc2Nc2ccc3scnc3c2)n1	3646546
CHEMBL1080980	1	1080980	5.3094	13.2687	5.0833	15.1687	c1ccc(-c2c[nH]c(Nc3ccc(CCNc4ncnc5ccsc45)cc3)n2)cc1											1	0	3.4929	9.5654	4.0633	3.4929	Cc1nc(N)nc(-c2cc(C(C)N3CCN(S(C)(=O)=O)CC3)cnc2Nc2ccc3scnc3c2)n1	3646582
CHEMBL1080981	1	1080981	4.34	13.1533	3.9213	14.3952	FC(F)(F)c1cccc(Nc2nc3ccc(CCNc4ncnc5ccsc45)cc3[nH]2)c1											1	0	3.3779	9.3515	4.2428	3.3779	Fc1cccc(-n2cnc3c(NCc4nc5ccccc5s4)nc(N4CCOCC4)nc32)c1	4211301
CHEMBL1081296	1	1081296	4.0645	10.0268	3.7349	11.4458	N[C@H](CNc1ncc(-c2ccc3cncnc3c2)s1)Cc1ccc(C(F)(F)F)cc1											1	0	3.2071	10.0914	3.7192	3.2071	Fc1cc(Br)ccc1Nc1ncnc2c1sc1nccnc12	2153549
CHEMBL1081312	49	1081312	9.3335	24.4409	9.934	27.9849	Nc1ncnc2c1c(-c1cnc3[nH]ccc3c1)nn2C1CCCC1											1	0	3.1387	9.8178	3.9263	3.1387	Cc1cnc2c(NCCN)nc3cc(C4=NCN=C4)sc3n12	398512
CHEMBL1081561	64	1081561	5.5477	13.1497	5.6324	15.3433	Nc1nc(OC2CCN(c3cc(-c4cc5ccccc5s4)ncn3)CC2)ncc1F											1	0	3.1811	9.8725	4.0399	3.1811	Cc1cnc2c(NCCN)nc3cc(-c4nccs4)sc3n12	398511
CHEMBL1081684	64	1081684	13.8479	41.5386	17.4524	47.136	Cc1cccc(C)c1CNc1ccnc2c1nc(C)n2C											1	0	3.1855	9.8155	4.0321	3.1855	Cc1cnc2c(NCCN)nc3cc(-c4ncc[nH]4)sc3n12	2375675
CHEMBL1081687	64	1081687	7.4672	20.9918	8.3479	23.7929	Cc1ncccc1-c1nnc(SCCCN2C[C@@H]3C[C@]3(c3ccc(C(F)(F)F)cc3)C2)n1C											1	0	3.1986	9.942	3.9825	3.1986	CNc1nc2cc(C)sc2n2c(C)cnc12	249073
CHEMBL1081867	64	1081867	7.3458	20.8913	8.3244	23.658	Cn1c(SCCCN2C[C@@H]3C[C@]3(c3ccc(C(F)(F)F)cc3)C2)nnc1-c1ccnnc1											1	0	3.2262	9.8109	4.1259	3.2262	Cc1cnc2c(NCCN)nc3cc(-c4ccc[nH]4)sc3n12	250105
CHEMBL1081870	64	1081870	14.1197	42.7377	17.9046	48.4402	Cc1cccc(C)c1CNc1nccc2c1nc(C)n2C											1	0	3.5466	10.0436	3.9619	3.5466	Nc1cnc2ccn(S(=O)(=O)c3c(Cl)nc4sccn34)c2c1	558306
CHEMBL1081880	1	1081880	5.0447	13.1318	5.3691	15.0572	FC(F)(F)c1ccc2[nH]c(Nc3ccc(CCNc4ncnc5ccsc45)nc3)nc2c1											1	0	3.5151	10.0132	3.9135	3.5151	O=S(=O)(c1c(Cl)nc2sccn12)n1ccc2ncccc21	559926
CHEMBL1081881	1	1081881	5.0447	13.1318	5.3691	15.0572	FC(F)(F)c1ccc2[nH]c(Nc3ccc(CCNc4ncnc5ccsc45)cn3)nc2c1											1	0	3.4097	10.7593	4.0339	3.4097	Brc1cccc(Sc2ccc3nnc(-c4cncs4)n3n2)c1	2348962
CHEMBL1081946	64	1081946	13.8238	41.0632	17.4137	46.696	Cc1ccc(Nc2nccc(-c3c(C)nc4ccccn34)n2)cc1											1	0	3.2644	9.8345	4.2363	3.2644	c1ccc2[nH]c(Nc3ncc(CCNc4ncnc5ccsc45)s3)nc2c1	1078827
CHEMBL1081947	64	1081947	13.8084	41.0408	17.3581	46.6511	Cc1nc2ccccn2c1-c1ccnc(Nc2ccc(C(F)(F)F)cc2)n1											1	0	3.3357	10.0411	4.1814	3.3357	CNc1nc2cc(-c3nccs3)sc2c2c1ncn2C	2375678
CHEMBL1082016	1	1082016	3.5626	8.383	3.9862	9.94267	Cn1c(=O)[nH]c2ccc(-c3cnc(NC[C@@H](N)Cc4ccc(C(F)(F)F)cc4)s3)cc21											1	0	3.3048	9.8698	4.2021	3.3048	Cc1cnc2c(NCCN)nc3cc(-c4ccccn4)sc3n12	398513
CHEMBL1082471	64	1082471	5.2438	13.7657	5.15	15.6049	CCC(C)(C)Cc1c[nH]c(CCc2ccc(-c3cnsc3)cc2)n1											1	0	3.5067	10.0281	4.3593	3.5067	Cc1nc(NC2CCCC2)sc1-c1ccnc(Nc2ccc(N3CCC(N)CC3)cn2)n1	4061223
CHEMBL1082492	1	1082492	4.0641	10.2906	4.4252	11.9162	Brc1cnc2[nH]c(-c3ccc(CN4CCOCC4)cc3)nc2c1N1CCN(Cc2cscn2)CC1											1	0	3.4861	10.0013	4.3639	3.4861	Cc1nc(NC(C)C)sc1-c1ccnc(Nc2ccc(N3CCN(C)CC3)cn2)n1	4088160
CHEMBL1082703	64	1082703	7.9236	21.7054	8.2454	24.5335	c1ccc2c(Cc3nnc4sc(-c5nccc6ccccc56)nn34)cccc2c1											1	0	3.4672	9.9326	4.2848	3.4672	Cc1nc(N(C)c2ccccc2)sc1-c1ccnc(Nc2ccc(N3CCN(C)CC3)cn2)n1	4077857
CHEMBL1082761	64	1082761	5.2203	14.5251	5.7778	16.4807	CNc1nn2cc3c(nc2c1S(=O)(=O)c1ccccc1)CCCC3											1	0	3.5261	10.0647	4.378	3.5261	Cc1nc(NC2CCCC2)sc1-c1nc(Nc2ccc(N3CCN(C)CC3)cn2)ncc1F	4072255
CHEMBL1082763	64	1082763	5.1979	14.5161	5.7761	16.4651	CNc1nn2c3c(cnc2c1S(=O)(=O)c1ccccc1)CCCC3											1	0	3.4437	9.7942	4.2324	3.4437	Cc1ccc2c(c1)sc1nc(-c3ccc(I)cc3)cn12	1771172
CHEMBL1083077	64	1083077	5.0827	14.4002	5.7783	16.3275	CN(C)c1nn2c3c(cnc2c1S(=O)(=O)c1ccccc1)CCC3											1	0	3.5159	10.0465	4.3795	3.5159	Cc1cc(Nc2nccc(C3CC3)n2)cc(-c2cnc(C3(N)CCC3)s2)c1	3685824
CHEMBL1083150	1	1083150	2.6739	8.0299	3.1901	9.04465	CNc1ccc(Nc2nccc(-c3sc(C)nc3C)n2)cc1											1	0	3.5261	10.0647	4.378	3.5261	Cc1nc(NC2CCCC2)sc1-c1nc(Nc2ccc(N3CCN(C)CC3)cn2)ncc1F	4072255
CHEMBL1083192	1	1083192	4.6885	12.7553	5.7759	14.7662	CS(=O)(=O)N1CCN(Cc2cc3nc(-c4cnc(N)nc4)nc(N4CCOCC4)c3s2)CC1											1	0	3.4349	10.1449	4.2174	3.4349	c1ccc(Nc2ncnc3c2sc2nccnc23)cc1	2153542
CHEMBL1083484	1	1083484	2.8907	8.299	3.4871	9.4546	Cc1nc(C)c(-c2ccnc(Nc3ccc(N4CCN(S(C)(=O)=O)CC4)cc3)n2)s1											1	0	3.5345	10.0886	4.398	3.5345	Cc1nc(NC2CCCC2)sc1-c1ccnc(Nc2ccc(N3CCCCC3)cn2)n1	4089373
CHEMBL1083654	64	1083654	5.0928	14.3748	5.7725	16.3062	CNc1nn2c3c(cnc2c1S(=O)(=O)c1ccccc1)CCC3											1	0	3.4519	10.0933	4.2452	3.4519	Clc1nc(-c2nccs2)c2sccc2n1	260773
CHEMBL1083810	64	1083810	4.7574	12.8174	5.7991	14.8509	CS(=O)(=O)N1CCN(Cc2cc3nc(-c4ccc(N)nc4)nc(N4CCOCC4)c3s2)CC1											1	0	3.52	10.3698	4.3085	3.52	Nc1ncnc2c1sc1nccnc12	2153541
CHEMBL1084244	64	1084244	5.2661	14.4091	6.0225	16.481	O=S(=O)(c1ccccc1)c1cnn2c(N3CCNCC3)c3c(nc12)CCC3											1	0	3.4974	10.0112	4.3609	3.4974	CCN1CCN(c2ccc(Nc3nccc(-c4sc(NC5CCCC5)nc4C)n3)nc2)CC1	4070914
CHEMBL1084384	49	1084384	7.2647	19.7607	7.719	22.4242	C[C@@H]1CCCN1CCc1ccc2nc(-c3cn4c(n3)SCC4)ccc2c1											1	0	3.5451	10.0792	4.3482	3.5451	Cc1cnc(Nc2cc(N3CCN(C)CC3)nc(N[C@@H](C)c3ccc(F)cn3)n2)s1	1087268
CHEMBL1084454	1	1084454	2.6564	8.0245	3.1633	9.02527	Cc1nc(C)c(-c2ccnc(Nc3ccc(N)cc3)n2)s1											1	0	3.5152	10.2868	4.2424	3.5152	CCCNc1ncc(-c2ccnc(-c3ccccn3)n2)s1	1258065
CHEMBL108452	64	108452	5.5011	15.8221	5.9445	17.7746	NS(=O)(=O)c1ccc(-n2cc(C(F)(F)F)nc2-c2cccnc2)cc1											1	0	3.4902	10.0124	4.3491	3.4902	Cc1nc(N(C)C2CCCC2)sc1-c1ccnc(Nc2ccc(N3CCN(C)CC3)cn2)n1	4084985
CHEMBL1084629	1	1084629	2.9174	8.125	3.603	9.3546	CNc1nc(C)c(-c2ccnc(Nc3ccc(N4CCOCC4)cc3)n2)s1											1	0	3.4635	9.922	4.2857	3.4635	Cc1nc(Nc2ccccc2)sc1-c1ccnc(Nc2ccc(N3CCN(C)CC3)cn2)n1	4103642
CHEMBL1084630	1	1084630	2.9174	8.125	3.603	9.3546	CCNc1nc(C)c(-c2ccnc(Nc3ccc(N4CCOCC4)cc3)n2)s1											1	0	3.5067	10.0281	4.3593	3.5067	Cc1nc(NC2CCCC2)sc1-c1ccnc(Nc2ccc(N3CCC(N)CC3)cn2)n1	4061223
CHEMBL108476	64	108476	0.8476	5.5766	2.1707	6.04391	CCCCCN1CCC=C(c2csc(N)n2)C1											1	0	3.5261	10.0647	4.378	3.5261	Cc1nc(NC2CCCC2)sc1-c1nc(Nc2ccc(N3CCN(C)CC3)cn2)ncc1F	4072255
CHEMBL1084786	64	1084786	8.1959	22.735	9.7367	26.0549	c1ccc(-c2ncc(NCN3CCCCC3)nn2)cc1											1	0	3.4873	10.123	4.2617	3.4873	FC(F)(F)c1cc(NCc2cccs2)n2ncnc2n1	1718384
CHEMBL1085134	1	1085134	5.4554	15.7213	5.4616	17.5143	CN(C)c1ccc(-c2nc3c(N4CCN(S(=O)(=O)c5ccccc5)CC4)c(Br)cnc3[nH]2)cc1											1	0	3.5067	10.0281	4.3593	3.5067	Cc1nc(NC2CCCC2)sc1-c1ccnc(Nc2ccc(N3CCC(N)CC3)cn2)n1	4061223
CHEMBL1085142	49	1085142	3.4552	10.2768	2.8757	11.217	Cc1c(-c2ccc3cc(CCN4CCC[C@H]4C)ccc3n2)sc2nc3ccccc3n12											1	0	3.5161	10.0487	4.3623	3.5161	Cc1nc(N(C)C2CCCC2)sc1-c1ccnc(Nc2ccc(N3CCNCC3)cn2)n1	4102935
CHEMBL1085177	1	1085177	4.703	12.7617	5.7777	14.777	Cc1nc(N)ncc1-c1nc(N2CCOCC2)c2sc(CN3CCN(S(C)(=O)=O)CC3)cc2n1											1	0	3.5315	10.0567	4.3743	3.5315	FC(F)(F)c1nc(NC2CCCC2)sc1-c1ccnc(Nc2ccc(N3CCNCC3)cn2)n1	4102076
CHEMBL1085626	1	1085626	2.9154	8.1276	3.5966	9.35377	Cc1nc(C)c(-c2ccnc(Nc3ccc(N4CCOCC4)cc3)n2)s1											1	0	3.47	9.8365	4.2481	3.47	Nc1ncnc2nc(-c3nccs3)c(Cc3cccc(Br)c3)cc12	364732
CHEMBL1085710	1	1085710	4.4595	12.8831	5.1541	14.5748	CN(C)CCCNS(=O)(=O)c1ccc(Nc2nccc(-c3ccsc3)n2)cc1											1	0	3.5105	10.1632	4.2876	3.5105	Cc1nc(NC2CCCC2)sc1-c1nc(Nc2ccc(N3CCCNCC3)cn2)ncc1F	4067844
CHEMBL1085823	64	1085823	7.8103	21.5654	8.2065	24.3601	c1ccc(-c2nnc3sc(-c4nccc5ccccc45)nn23)cc1											1	0	3.4861	10.0013	4.3639	3.4861	Cc1nc(NC(C)C)sc1-c1ccnc(Nc2ccc(N3CCN(C)CC3)cn2)n1	4088160
CHEMBL1085880	1	1085880	4.4911	12.9011	5.1934	14.6144	CN(C)CCNS(=O)(=O)c1ccc(Nc2nccc(-c3ccsc3)n2)cc1											1	0	3.5295	10.0578	4.3706	3.5295	CN1CCN(c2ccc(Nc3nccc(-c4sc(NC5CCCC5)nc4C(F)(F)F)n3)nc2)CC1	4066828
CHEMBL1085936	64	1085936	5.1234	14.6882	4.9029	16.3105	O=[N+]([O-])c1ccc(Cn2ccnc2)c(Sc2ccccc2)c1											1	0	3.5357	10.0935	4.3974	3.5357	Cc1nc(N(C2CCCC2)C2CCCC2)sc1-c1ccnc(Nc2ccc(N3CCNCC3)cn2)n1	4065844
CHEMBL1086112	64	1086112	10.5887	32.6642	13.9099	37.048	CCCc1nc(C)c2c(C)nc3cccnc3n12											1	0	3.4763	9.9347	4.2981	3.4763	Cc1nc(Nc2ccccc2)sc1-c1ccnc(Nc2ccc(N3CCNCC3)cn2)n1	4085708
CHEMBL108682	64	108682	0.8471	5.5392	2.2698	6.04585	CCCN1CCC=C(c2csc(NC)n2)C1											1	0	3.4547	10.7509	4.1771	3.4547	c1ccc(Sc2ccc3nnc(-c4cncs4)n3n2)cc1	2348970
CHEMBL1086894	64	1086894	10.2725	31.9807	12.9629	36.0045	N/C(=N/CCc1c[nH]cn1)c1ccccn1											1	0	3.4648	10.7976	4.2056	3.4648	Cc1ccc(-c2csc(N(CCO)CCCn3c(C(F)(F)F)nc4cc(C(F)(F)F)ccc43)n2)cc1	1554760
CHEMBL1086924	64	1086924	4.7512	12.7971	5.784	14.8255	CS(=O)(=O)N1CCN(Cc2cc3nc(-c4cccnc4)nc(N4CCOCC4)c3s2)CC1											1	0	3.7822	8.8857	3.6253	3.7822	CNc1nc(C)c(-c2nc(Nc3ccc(C)c(S(=O)(=O)N4CCOCC4)c3)ncc2C#N)s1	2312189
CHEMBL1087023	64	1087023	10.2191	32.4922	13.419	36.6093	N/C(=N/CCCn1ccnc1)c1ccccn1											1	0	3.8535	9.0875	3.6813	3.8535	O=S(=O)(c1ccc(-c2ccnc(Nc3ccc4ncsc4c3)n2)cc1)N1CCOCC1	257189
CHEMBL1087268	1	1087268	3.5451	10.0792	4.3482	11.5354	Cc1cnc(Nc2cc(N3CCN(C)CC3)nc(N[C@@H](C)c3ccc(F)cn3)n2)s1											1	0	3.7847	8.9032	3.6318	3.7847	CNc1nc(C)c(-c2ccnc(Nc3ccc(C)c(S(=O)(=O)N4CCOCC4)c3)n2)s1	3087431
CHEMBL1087269	1	1087269	3.7023	10.157	4.5923	11.7457	Cc1cnc(Nc2cc(N3CCOCC3)nc(N[C@@H](C)c3ccc(F)cn3)n2)s1											1	0	3.7898	8.9184	3.6408	3.7898	CNc1nc(C)c(-c2nc(Nc3ccc(C)c(S(=O)(=O)N4CCOCC4)c3)ncc2F)s1	3087440
CHEMBL1087274	64	1087274	10.715	33.9008	13.7812	38.1313	N/C(=N/CCCn1ccnc1)c1ccncc1											1	0	3.7781	8.9258	3.6093	3.7781	CS(=O)(=O)c1cccc(Nc2nccc(-c3sc(N4CCOCC4)nc3-c3cccc(NS(=O)(=O)c4c(F)cccc4F)c3)n2)c1	3628627
CHEMBL1087398	1	1087398	3.6336	10.0389	4.534	11.5991	C[C@H](Nc1nc(Nc2ncc(C#N)s2)cc(N2CCOCC2)n1)c1ccc(F)cn1											1	0	3.7796	8.9047	3.6313	3.7796	CNc1nc(-c2ccccc2)c(-c2ccnc(Nc3ccc(C)c(S(=O)(=O)N4CCOCC4)c3)n2)s1	2312192
CHEMBL1087905	64	1087905	11.8543	35.2194	13.9466	39.6918	N/C(=N/CCc1c[nH]cn1)c1ccncc1											1	0	3.5907	9.6249	3.7961	3.5907	Cn1cc(-c2cc(F)c3nnc(Cc4ccc5nc(N)sc5c4)n3c2)cn1	3414912
CHEMBL1088410	64	1088410	10.2971	27.3235	10.8998	31.1674	CCC(C)(C)Cc1c[nH]c(CCc2ccc(N3CCCC[C@@H]3c3nnn[nH]3)cc2)n1											1	0	3.6021	9.6058	3.7208	3.6021	Cc1cc(Nc2ccnc(Nc3ccc(-c4nc5ccccc5s4)cc3)n2)n[nH]1	461109
CHEMBL1088411	64	1088411	10.3391	27.3989	10.9962	31.2812	CCC(C)(C)Cc1c[nH]c(CCc2ccc(N3CCCC[C@@H]3c3ncn[nH]3)cc2)n1											1	0	3.8231	9.2379	3.4756	3.8231	CC(C)(C)c1nc2c(s1)c1nc(N)ncc1c1ccc(NS(=O)(=O)c3c(F)cccc3F)c(F)c12	3968190
CHEMBL1088458	64	1088458	0.2476	2.3338	1.7727	2.94116	C/C(=C\C=C\C[C@H](C)C(Cl)(Cl)Cl)C(=O)N[C@H](c1nccs1)C(C)C											1	0	3.5802	9.5794	3.7179	3.5802	Cc1cc(Nc2ccnc(Nc3cccc(-c4nc5ccccc5s4)c3)n2)n[nH]1	491686
CHEMBL1088553	64	1088553	10.2306	27.0594	10.8102	30.8826	CCC(C)(C)Cc1c[nH]c(CCc2ccc(N3CCCc4cn[nH]c43)cc2)n1											1	0	3.5998	9.6205	3.72	3.5998	NCCNc1ccn2ncc(-c3ccc4scnc4c3)c2n1	2442303
CHEMBL1089199	64	1089199	14.5075	42.9653	18.5653	49.0016	Cc1ccc(C(C)(C)C)cc1Nc1nc(NCCc2ccncc2)nc2ncn(C)c12											1	0	3.8527	9.5898	3.4747	3.8527	Cc1nc2ccc3cnc(Nc4ccccc4)nc3c2s1	591228
CHEMBL108936	64	108936	5.5054	15.8095	5.9689	17.7729	Cc1ccc(-c2nc(C(F)(F)F)cn2-c2ccc(S(N)(=O)=O)cc2)cn1											1	0	4.0106	9.5496	3.6458	4.0106	Brc1ccc(CN2CCc3nc(N4CCCC4)ncc3C2)s1	3235860
CHEMBL1089511	64	1089511	5.2955	13.796	5.2149	15.6706	CCC(C)(C)Cc1c[nH]c(CCc2ccc(-c3csnn3)cc2)n1											1	0	3.9402	9.7561	3.6163	3.9402	c1ccc2sc(-c3ccc(Nc4ncnc5[nH]ccc45)cc3)nc2c1	518803
CHEMBL1089512	64	1089512	15.2343	45.2783	18.5988	51.2652	CCC(C)(C)Cc1c[nH]c(CCc2ccc(-c3cnccn3)cc2)n1											1	0	3.9524	9.2838	3.4732	3.9524	O=S(=O)(c1ccc(-c2ccnc(Nc3ccc4ncsc4c3)n2)cc1)N1CCCCC1	401919
CHEMBL1089523	64	1089523	9.8546	26.9963	10.444	30.5776	CCC(C)(C)Cc1c[nH]c(CCc2ccc(-n3ccnn3)cc2)n1											1	0	3.9652	9.347	3.5542	3.9652	O=S(=O)(c1ccc(-c2ccnc(Nc3ccc(-c4ccc5ncsc5c4)cc3)n2)cc1)N1CCNCC1	129981
CHEMBL108961	64	108961	5.5512	15.8326	5.9427	17.799	Cc1ccnc(-c2nc(C(F)(F)F)cn2-c2ccc(S(N)(=O)=O)cc2)c1											1	0	3.8801	9.625	3.5153	3.8801	Cc1nc2ccc3cnc(NCc4ccccc4)nc3c2s1	596953
CHEMBL1089687	64	1089687	9.816	25.7115	10.4103	29.4246	O=[N+]([O-])c1cccc(-c2nnc(NCCCN3CCN(c4ncccn4)CC3)c3cc4ccccn4c23)c1											1	0	3.9314	9.3201	3.488	3.9314	O=S(=O)(c1ccc(-c2ccnc(Nc3ccc4ncsc4c3)n2)cc1)N1CCCC1	256523
CHEMBL108978	64	108978	5.3925	14.8068	5.5102	16.6938	CS(=O)(=O)c1ccc(-n2cc(C(F)(F)F)nc2-c2cc3ccccc3cn2)cc1											1	0	3.9549	9.2879	3.4912	3.9549	Cn1nnnc1Sc1ncnc2scc(-c3cccc([N+](=O)[O-])c3)c12	1324313
CHEMBL1089902	64	1089902	10.3666	28.6893	11.3719	32.5555	Nc1nc2nn(CCc3ccccc3)cc2c2nc(-c3ccc(Br)cc3)nn12											1	0	3.9949	9.7516	3.5178	3.9949	CNc1nccc(Nc2ccc(-c3nc4ccccc4s3)cc2)n1	512933
CHEMBL1089985	1	1089985	8.1125	23.7571	9.6195	26.884	c1cc(-c2cn[nH]c2)c2cc[nH]c2n1											1	0	4.1365	9.754	3.7236	4.1365	CN1CCN(c2ccnc(Nc3ccc(-c4nc5ccccc5s4)cc3)n2)CC1	459886
CHEMBL1089986	1	1089986	8.0874	23.6935	9.6228	26.8214	Cn1cc(-c2ccnc3[nH]ccc23)cn1											1	0	4.0206	9.7097	3.5883	4.0206	CN(C)c1ccnc(Nc2ccc(-c3nc4ccccc4s3)cc2)n1	462161
CHEMBL109017	64	109017	2.5839	8.3205	3.2202	9.28854	Cc1csc(-c2nc(C(F)(F)F)cn2-c2ccc(S(N)(=O)=O)cc2)n1											1	0	3.978	9.6888	3.5182	3.978	CNc1ccnc(Nc2ccc(-c3nc4ccccc4s3)cc2)n1	462160
CHEMBL1090250	64	1090250	5.0702	12.3916	4.7384	14.2025	C(=N/Nc1ncnc2sc3c(c12)CCCC3)\c1ccccn1											1	0	3.792	9.6862	4.1542	3.792	c1ccc(-c2cc3c(cn2)ncc2ncn(-c4ccc5nc(NCCN6CCOCC6)sc5c4)c23)cc1	3899461
CHEMBL109028	1	109028	7.223	19.3926	7.685	22.075	CSc1nc(-c2ccc(F)cc2)c(-c2ccnc(NCc3ccccc3)c2)[nH]1											1	0	3.7269	9.6823	3.9124	3.7269	CN1CCN(c2ccc3nc(-c4ccc5ncsc5c4)c(-c4ccncc4)n3n2)CC1	3734983
CHEMBL1090489	64	1090489	8.1782	23.0659	9.0645	26.0976	Cn1cc2c(nc(N)n3nc(-c4ccc(F)cc4)nc23)n1											1	0	3.6953	9.6356	3.8531	3.6953	C[C@H]1CCCN1c1cccc(Nc2cc(-c3ccc4ncsc4c3)nn3ccnc23)n1	3900807
CHEMBL1090598	1	1090598	4.7085	12.7279	5.8215	14.7668	CN(Cc1cc2nc(-c3cnc(N)nc3)nc(N3CCOCC3)c2s1)S(C)(=O)=O											1	0	3.565	9.5244	3.8883	3.565	Cc1nc2ccc(-n3cnc4cnc5cnc(-c6ccccc6)cc5c43)cc2s1	3936462
CHEMBL1090600	1	1090600	5.5769	13.1895	5.617	15.3823	CC(C)(N)c1cc2nc(-c3cnc(N)nc3)nc(N3CCOCC3)c2s1											1	0	3.7954	9.6875	4.1494	3.7954	CC(CN1CCOCC1)Nc1nc2ccc(-n3cnc4cnc5cnc(-c6ccccc6)cc5c43)cc2s1	3927501
CHEMBL1090601	1	1090601	5.6406	13.3238	5.6332	15.5265	CS(=O)(=O)c1cccc(-c2cc3nc(-c4cnc(N)nc4)nc(N4CCOCC4)c3s2)c1											1	0	3.839	9.7496	4.1627	3.839	CC(CN1CCOCC1)Nc1nc2ccc(-n3cnc4cnc5cnc(-c6ccncc6)cc5c43)cc2s1	3890505
CHEMBL1090811	64	1090811	10.1497	28.5842	11.2651	32.357	Cn1cc2c(nc(N)n3nc(-c4ccc(Br)cc4)nc23)n1											1	0	3.6906	9.651	3.8598	3.6906	Cc1nc2cc(Nc3cc(C4CCCNC4)nc4c(-c5cnn(C)c5)cnn34)ccc2s1	1643459
CHEMBL1091175	64	1091175	15.6918	46.3485	19.9705	52.8511	c1ccc(CNCc2ccc(CN(Cc3ncc[nH]3)C3CCCc4cccnc43)cc2)nc1											1	0	3.8511	9.748	4.1934	3.8511	CC(CN1CCOCC1)Nc1nc2ccc(-n3cnc4cnc5cnc(-c6cccs6)cc5c43)cc2s1	3918552
CHEMBL1091206	64	1091206	5.0883	14.425	5.744	16.3391	CSc1nn2c3c(cnc2c1S(=O)(=O)c1ccccc1)CCC3											1	0	3.9456	9.7739	3.627	3.9456	c1cc(Nc2ncnc3[nH]ccc23)cc(-c2nc3ccccc3s2)c1	490555
CHEMBL1091207	64	1091207	5.2078	14.5655	5.8009	16.5205	CSc1nn2c3c(cnc2c1S(=O)(=O)c1ccccc1)CCCC3											1	0	3.9954	9.7918	3.6697	3.9954	Cc1[nH]cnc1Cc1nc(-c2cccc3cccnc23)cs1	421747
CHEMBL1091208	64	1091208	5.2291	14.5756	5.8016	16.5363	CSc1nn2cc3c(nc2c1S(=O)(=O)c1ccccc1)CCCC3											1	0	4.0645	10.0268	3.7349	4.0645	N[C@H](CNc1ncc(-c2ccc3cncnc3c2)s1)Cc1ccc(C(F)(F)F)cc1	1081296
CHEMBL1091317	1	1091317	4.9068	11.3924	4.7678	13.2889	Nc1ncnc2c1sc1nc(N3CCOCC3)c3c(c12)CCCC3											1	0	3.7432	10.2403	3.9149	3.7432	Cc1cnc2c(N)nc3cc(-c4ccccc4)sc3n12	399383
CHEMBL109143	64	109143	2.5738	8.3747	3.2384	9.34063	Cc1nc(-c2nc(C(F)(F)F)cn2-c2ccc(S(N)(=O)=O)cc2)cs1											1	0	3.7948	10.2319	3.9855	3.7948	CNc1nc2cc(-c3cccc(CN)c3)sc2n2c(C)cnc12	400077
CHEMBL1091598	64	1091598	15.6445	46.5328	19.2329	52.7253	c1ccc(-c2ccc(CCc3nc(CC4CCCC4)c[nH]3)cc2)nc1											1	0	3.77	10.1799	4.0242	3.77	CNc1nc2cc(-c3cccc(CNS(N)(=O)=O)c3)sc2n2c(C)cnc12	249280
CHEMBL1091599	64	1091599	15.443	45.8341	18.8131	51.8959	CCC(C)(C)Cc1c[nH]c(CCc2ccc(-c3cccnc3)cc2)n1											1	0	3.7156	10.4279	4.0295	3.7156	CC(C)Nc1ncc(-c2cc(-c3ccccc3Cl)nc(N(C)C)n2)s1	1258863
CHEMBL1091720	18	1091720	15.3887	45.6297	18.7202	51.6655	CCC(C)(C)Cc1c[nH]c(CCc2ccc(-c3ccccn3)cc2)n1											1	0	3.7851	10.1547	4.0265	3.7851	CNc1nc2cc(-c3cccc(CCNS(N)(=O)=O)c3)sc2n2c(C)cnc12	249482
CHEMBL1091902	64	1091902	3.1342	9.5842	2.5533	10.4019	CCc1nc(CN2CCN(c3cccc4sc(-c5ccc(C(C)(C)C)cc5)nc34)CC2)c(C)[nH]1											1	0	3.637	9.9743	3.8213	3.637	Nc1cc(/C=C/c2c(-c3ccccc3)nc3sccn23)ncn1	502543
CHEMBL1091977	1	1091977	5.5942	13.207	5.569	15.3862	Cc1c(-c2cccc(S(C)(=O)=O)c2)sc2c(N3CCOCC3)nc(-c3cnc(N)nc3)nc12											1	0	3.8293	10.0558	4.163	3.8293	C[C@H](CO)Nc1nc(SCc2ccccc2Cl)nc2nc(N)sc12	233259
CHEMBL1091978	1	1091978	4.6865	12.6226	5.6831	14.6148	Cc1c(CN2CCN(S(C)(=O)=O)CC2)sc2c(N3CCOCC3)nc(-c3cnc(N)nc3)nc12											1	0	3.6551	10.0424	4.1421	3.6551	O=S(=O)(c1c(Cl)nc2sccn12)n1ccc2ncc(N3CCNCC3)cc21	560575
CHEMBL1091984	64	1091984	15.4451	45.8628	18.8769	51.945	CCC(C)(C)Cc1c[nH]c(CCc2ccc(-c3ccncc3)cc2)n1											1	0	3.7237	10.3604	3.8712	3.7237	c1ccc(-c2ccn3c(-c4nccs4)cnc3c2)cc1	354895
CHEMBL1091985	64	1091985	15.3887	45.6297	18.7202	51.6655	CCC(C)(C)Cc1c[nH]c(CCc2ccc(-c3cccc(C)n3)cc2)n1											1	0	3.849	10.5621	4.0279	3.849	Cc1sc2nc(-c3cccnc3)c(/C=N/NC(=N)N)n2c1C.Cl	1910761
CHEMBL109202	64	109202	0.8202	5.5764	2.1394	6.02876	CN1CCC=C(c2csc(N)n2)C1											1	0	3.7239	10.3199	3.8758	3.7239	N#C/N=C(\NCCSc1ccccc1)NCCc1c[nH]cn1	1080773
CHEMBL1092240	49	1092240	4.1088	13.8136	4.765	15.179	O=[N+]([O-])c1c(Nc2ccc(-n3cncn3)cc2)ncnc1N1CCC(Sc2ccccn2)CC1											1	0	3.8069	10.2621	3.9768	3.8069	Cc1cnc2c(NCCN)nc3cc(-c4ccccc4)sc3n12	249901
CHEMBL1092261	64	1092261	4.8988	12.217	4.6717	13.967	C(=N/Nc1ncnc2sc3c(c12)CCCC3)\c1ccc[nH]1											1	0	3.8566	10.1248	4.1575	3.8566	O=S(=O)(Nc1ccc(F)c(Nc2ncccc2-c2ncnc3[nH]cnc23)c1F)c1nccs1	3800081
CHEMBL1092262	64	1092262	5.1011	12.3151	4.6682	14.1236	C(=N/Nc1ncnc2sc3c(c12)CCCC3)\c1ccncc1											1	0	3.8064	10.2771	3.9655	3.8064	CCNc1nc2cc(-c3ccccc3)sc2n2c(C)cnc12	249720
CHEMBL1092381	64	1092381	15.0344	44.4883	18.274	50.3903	CCC(C)(C)Cc1c[nH]c(CCc2ccc(-c3cccc(N)n3)cc2)n1											1	0	3.811	10.6073	4.0098	3.811	Cc1csc2nc(-c3cccnc3)c(/C=N/NC(=N)N)n12.Cl	1910762
CHEMBL1092720	64	1092720	0.0849	2.6539	1.4928	3.04612	C#CCCC(=O)O/N=C(\C)c1nccs1											1	0	3.7875	10.2856	3.9529	3.7875	CNc1nc2cc(-c3ccccc3)sc2n2c(C)cnc12	249719
CHEMBL1092791	64	1092791	0.1849	1.7614	1.4274	2.27468	C/C(=N\OC(=O)C1CCCCC1)c1nccs1											1	0	3.8185	10.2264	3.9975	3.8185	Cc1cccc(-c2cc3nc(NCCN)c4ncc(C)n4c3s2)c1	1650981
CHEMBL1092792	64	1092792	0.0868	2.9144	1.5307	3.29307	CC(=O)O/N=C(\C)c1nccs1											1	0	3.7923	10.0064	4.1308	3.7923	Cc1nc2ccc(S(=O)(=O)Nc3ccc(F)c(Nc4ncccc4-c4ncnc5[nH]cnc45)c3F)cc2s1	3893840
CHEMBL1092793	64	1092793	0.2077	2.6287	1.6232	3.09645	C/C(=N\OC(=O)N1CCCCC1)c1nccs1											1	0	3.8197	10.2597	3.9957	3.8197	Cc1cnc2c(NCCN(C)C)nc3cc(-c4ccccc4)sc3n12	249721
CHEMBL109303	64	109303	5.6986	14.9941	5.6781	17.0158	Cc1cc(NCc2cncn2Cc2ccc(C#N)cc2)ccc1S(=O)(=O)c1ccccc1											1	0	3.8336	10.1426	4.1697	3.8336	O=S(=O)(c1ccc(F)cc1)N1CCCC(Nc2nccc(-c3c(-c4ccc(F)cc4)nc4sccn34)n2)C1	4291732
CHEMBL1093183	64	1093183	15.2611	45.1523	18.6584	51.1837	CCC(C)(C)Cc1c[nH]c(CCc2ccc(-c3cccc(C#N)n3)cc2)n1											1	0	4.0941	9.8445	3.8523	4.0941	CNc1cc(-c2cccnc2Nc2c(C)ccc3c(Nc4ccc5sc(C)nc5c4)nccc23)ncn1	570573
CHEMBL1093184	64	1093184	15.4377	45.8041	18.813	51.8678	CCC(C)(C)Cc1c[nH]c(CCc2ccc(-c3ccc(F)cn3)cc2)n1											1	0	4.0887	10.4032	4.1398	4.0887	FC(F)(F)c1ccc2nc(Nc3ncc(CCNc4ncnc5ccsc45)s3)[nH]c2c1	1078828
CHEMBL1093235	1	1093235	2.9837	8.4537	2.8634	9.41098	O=[N+]([O-])c1cccc(-c2nc3sccn3c2-c2ccnc(Nc3ccccc3)n2)c1											1	0	3.9272	10.4762	4.1623	3.9272	Cn1cc(-c2csc(-c3c[nH]c4ccccc34)n2)c2cccnc21	2435287
CHEMBL109331	1	109331	7.2328	19.3792	7.6912	22.0686	CSc1nc(-c2ccc(F)cc2)c(-c2ccnc(N[C@H](C)c3ccccc3)c2)[nH]1											1	0	4.1836	9.8481	4.0262	4.1836	c1ccc2sc(CC3CCCN(c4ncnc5cc(N6CCOCC6)ccc45)C3)nc2c1	3906600
CHEMBL1093459	64	1093459	5.2765	13.8242	5.1687	15.6737	CCC(C)(C)Cc1c[nH]c(CCc2ccc(-c3ccns3)cc2)n1											1	0	4.1836	9.8481	4.0262	4.1836	c1ccc2sc(CC3CCCN(c4ncnc5cc(N6CCOCC6)ccc45)C3)nc2c1	3906600
CHEMBL1093464	64	1093464	14.3987	43.0218	18.6106	49.0362	Cc1ccc(C(C)(C)C)cc1Nc1nc(-c2ccc(Cc3ccncc3)cc2)nc2ncn(C)c12											1	0	4.4067	10.6783	4.0075	4.4067	Cc1csc(-c2nc(Nc3ccncc3)c3ccccc3n2)n1	541777
CHEMBL109352	1	109352	6.944	19.584	7.3726	22.0478	CSc1nc(-c2ccc(F)cc2)c(-c2ccncc2)n1C											1	0	4.2005	10.8424	4.1367	4.2005	Cn1cc(-c2ccc3c(c2)ncn3-c2cc(Nc3nccs3)cc(-c3ccc(F)cc3F)c2)cn1	3899205
CHEMBL1093607	64	1093607	3.0443	11.4601	5.0784	12.8993	CC(c1c(CCN(C)C)sc2ccccc12)n1ccnc1											1	0	4.229	10.9559	4.1679	4.229	Cc1cn(-c2nc(-c3c[nH]c4ccc(-c5nnc(N)s5)cc34)cs2)cn1	3911843
CHEMBL109418	64	109418	5.6447	14.9022	5.6455	16.9059	Cc1ncc(CNc2ccc(S(=O)(=O)c3ccccc3)cc2)n1Cc1ccc(C#N)cc1											1	0	4.4214	10.6632	4.0975	4.4214	[C-]#[N+]c1cc(C#N)cc([N+]#[C-])c1-c1nc2ccnc(Nc3cc(C)nc(C)n3)c2s1	3675699
CHEMBL1094512	64	1094512	2.2924	8.7301	2.6151	9.39726	Cc1csc(Cn2c(C3CCCN(C)C3)nc3ccccc32)n1											1	0	4.523	10.8989	4.1024	4.523	CCCNc1ncc(-c2cc(-c3ccc(F)cc3)nc(-c3ccccn3)n2)s1	1258066
CHEMBL109570	1	109570	5.5702	14.4291	5.6108	16.4532	C[S+]([O-])c1ccc(CSc2nc(-c3ccc(F)cc3)c(-c3ccnc(NCc4ccccc4)c3)[nH]2)cc1											1	0	4.523	10.8989	4.1024	4.523	CCCNc1ncc(-c2cc(-c3ccc(F)cc3)nc(-c3ccccn3)n2)s1	1258066
CHEMBL109580	1	109580	7.223	19.3926	7.685	22.075	CSc1nc(-c2ccc(F)cc2)c(-c2ccnc(NCCc3ccccc3)c2)[nH]1											1	0	3.7443	10.3436	4.2037	3.7443	Cc1ccnc(Nc2nc(-c3c(C)nc4cc(C)ccn34)cs2)c1	4104855
CHEMBL1095818	64	1095818	2.6959	7.8794	3.6481	9.09183	Cc1csc(Cn2c(C3CCCN(C4CCOCC4)C3)nc3ccccc32)n1											1	0	3.8589	10.2814	4.1764	3.8589	N#Cc1cccc(-c2nc(Nc3cnccn3)sc2-n2ccnc2)c1	2113095
CHEMBL1096117	64	1096117	3.2992	10.4362	4.2479	11.7407	CC(C)c1csc(-c2nnc(S)n2/N=C/c2ccc[nH]2)n1											1	0	3.8434	10.2332	4.2005	3.8434	CC(C)n1cnc2c(NCc3cnc(-c4ccccc4)s3)nc(N[C@H]3CC[C@H](N)CC3)nc21.Cl	567624
CHEMBL1096514	49	1096514	9.282	30.8576	12.395	34.5251	c1ccc(NCCc2c[nH]cn2)cc1											1	0	3.5941	10.341	4.34	3.5941	Cc1nc(NC2CCCC2)sc1-c1ccnc(Nc2ccccn2)n1	4097082
CHEMBL1097041	64	1097041	3.8104	9.1218	4.3941	10.8182	Cn1c(=O)sc2cc(C(c3ccccc3)n3ccnc3)ccc21											1	0	3.5755	10.0014	4.2674	3.5755	CS(=O)(=O)N1CCN(c2ccnc(Nc3ncc(-c4cncnc4)s3)c2)CC1	2011336
CHEMBL109732	1	109732	5.5891	14.4362	5.6338	16.4737	CC(Nc1cc(-c2[nH]c(SCc3ccc([S+](C)[O-])cc3)nc2-c2ccc(F)cc2)ccn1)c1ccccc1											1	0	3.6851	10.2004	4.3811	3.6851	CCN1CCN(Cc2ccc(Nc3nccc(-c4sc(NC5CCCC5)nc4C)n3)nc2)CC1	4103372
CHEMBL109761	64	109761	5.3926	14.3087	5.1705	16.1417	FC(F)(F)c1cccc(SCCc2c[nH]cn2)c1											1	0	3.6858	10.3148	4.3908	3.6858	c1cc(Nc2ncc(-c3cncnc3)s2)nc(N2CCNCC2)c1	2013063
CHEMBL1097929	64	1097929	6.906	19.7518	7.9393	22.3799	NC(=S)N/N=C/c1ccc2cccnc2n1											1	0	3.8536	10.4327	4.3977	3.8536	Nc1nc(-c2ccccn2)c(-c2ccnc3ncccc23)s1	181958
CHEMBL1097930	64	1097930	6.9496	19.7912	8.0023	22.4505	CN(C)C(=S)N/N=C/c1ccc2cccnc2n1											1	0	3.7049	10.2328	4.3988	3.7049	CCN1CCN(Cc2ccc(Nc3ncc(F)c(-c4sc(NC5CCCC5)nc4C)n3)nc2)CC1	4067549
CHEMBL1098002	49	1098002	5.4075	14.3466	5.168	16.1794	FC(F)(F)c1ccc(SCCc2c[nH]cn2)cc1											1	0	3.6671	10.276	4.3952	3.6671	c1ncc(-c2cnc(Nc3cc(N4CCNCC4)ccn3)s2)cn1	2013062
CHEMBL1098188	64	1098188	8.6256	23.8877	10.2786	27.3984	Nc1n[nH]c2nc(N3CCCCC3)c3c(c12)CCN(Cc1ccccn1)C3											1	0	3.6776	10.4743	4.3041	3.6776	Cc1ncc(-c2cnc(Nc3cccc(NCCCN)n3)s2)cn1	2011340
CHEMBL1098230	49	1098230	5.4032	14.2949	5.1821	16.1367	CC(C)(C)c1ccc(SCCc2c[nH]cn2)cc1											1	0	3.6678	10.008	4.2564	3.6678	O=S(=O)(Nc1ncccn1)c1ccc(NC(=S)N2CCN(c3ncnc4c3sc3ncccc34)CC2)cc1	3924103
CHEMBL109927	64	109927	4.6406	12.8769	4.8457	14.52	Cc1ccsc1-c1nc(C#N)c[nH]1											1	0	3.6669	10.2691	4.3819	3.6669	Cc1ncc(-c2cnc(Nc3cc(N4CCNCC4)ccn3)s2)cn1	2011337
CHEMBL110145	64	110145	5.5431	15.828	5.976	17.8035	Cc1ncccc1-c1nc(C(F)(F)F)cn1-c1ccc(S(N)(=O)=O)cc1											1	0	3.6862	10.3101	4.3768	3.6862	Cc1ncc(-c2cnc(Nc3cccc(N4CCNCC4)n3)s2)cn1	2011339
CHEMBL110254	64	110254	12.8688	34.9129	14.3324	39.874	CCCNc1ccnc2nc(N3CCCC3)c(F)cc12											1	0	3.8855	10.3109	4.197	3.8855	Cc1cnc2c(NCCN)nc3cc(-c4cccnc4)sc3n12	250107
CHEMBL110262	1	110262	7.2972	19.8332	7.637	22.4706	Fc1ccc(-c2nc(SCc3ccccc3)[nH]c2-c2ccnc(F)c2)cc1											1	0	3.9271	10.5007	4.2004	3.9271	Cn1cc(-c2nc(-c3c[nH]c4ncccc34)cs2)c2cc(F)ccc21	2435286
CHEMBL110263	1	110263	7.2117	19.359	7.6784	22.0394	CSc1nc(-c2ccc(F)cc2)c(-c2ccnc(NCc3ccc(C)cc3)c2)[nH]1											1	0	3.9941	10.2574	4.1911	3.9941	c1ncc(-c2cc3c(cn2)[nH]c2ncc(-c4ccc(CN5CCCCC5)cc4)cc23)s1	3582224
CHEMBL110272	64	110272	0.8471	5.5392	2.2698	6.04585	CCCCN1CCC=C(c2csc(NC)n2)C1											1	0	3.8791	10.142	4.4184	3.8791	CC(C)c1nc(-c2cccc(NS(=O)(=O)c3c(F)cccc3F)c2)c(-c2ccnc(Nc3ccc(N4CCOCC4)nc3)n2)s1	1808261
CHEMBL110331	64	110331	4.6527	15.2188	6.0258	17.0167	Cc1cccc(-c2nc(C(F)(F)F)cn2-c2ccc(S(N)(=O)=O)cc2)n1											1	0	3.8791	10.142	4.4184	3.8791	CC(C)c1nc(-c2cccc(NS(=O)(=O)c3c(F)cccc3F)c2)c(-c2ccnc(Nc3ccc(N4CCOCC4)nc3)n2)s1	1808261
CHEMBL110382	64	110382	3.767	12.5642	4.798	13.9668	CS(=O)(=O)c1ccc(-n2cc(C(F)(F)F)nc2-c2cc(Br)cs2)cc1											1	0	4.0641	10.2906	4.4252	4.0641	Brc1cnc2[nH]c(-c3ccc(CN4CCOCC4)cc3)nc2c1N1CCN(Cc2cscn2)CC1	1082492
CHEMBL110446	64	110446	5.4743	14.8317	5.5306	16.7492	CS(=O)(=O)c1ccc(-n2cc(C(F)(F)F)nc2-c2cnc3ccccc3c2)cc1											1	0	4.0695	10.3468	4.4645	4.0695	Nc1ncnc2sc(-c3c(-c4ccccc4)ncn3Cc3ccccc3N3CCOCC3)nc12	1079773
CHEMBL110448	64	110448	5.0675	14.5471	5.4927	16.3544	Cc1cn(-c2ccc(S(C)(=O)=O)cc2)c(-c2cccnc2)n1											1	0	3.9127	10.2553	4.2341	3.9127	Cc1cnc2c(NCCN3CCNCC3)nc3cc(-c4ccccc4)sc3n12	2375541
CHEMBL110512	64	110512	0.884	5.2463	2.4212	5.84528	CCCN1CCCC(c2csc(N)n2)C1											1	0	3.9008	10.3229	4.3255	3.9008	c1cc2c3cnc(Nc4nc(CN5CCNCC5)cs4)nc3n(C3CCCC3)c2cn1	3702071
CHEMBL110574	64	110574	5.1079	14.5793	5.5097	16.4013	Cc1ncccc1-c1nc(C(F)(F)F)cn1-c1ccc(S(C)(=O)=O)cc1											1	0	3.868	10.6082	4.2117	3.868	Cn1cc(-c2nc(-c3cn(C)c4ncccc34)cs2)c2cc(F)ccc21	2435289
CHEMBL110860	64	110860	3.9786	13.8925	5.4509	15.4448	CCS(=O)(=O)Nc1cccc(S(=O)(=O)c2c[nH]cn2)c1											1	0	3.8791	10.142	4.4184	3.8791	CC(C)c1nc(-c2cccc(NS(=O)(=O)c3c(F)cccc3F)c2)c(-c2ccnc(Nc3ccc(N4CCOCC4)nc3)n2)s1	1808261
CHEMBL110876	64	110876	4.6648	13.1608	4.9041	14.7992	Cc1ccsc1-c1nc(C(F)(F)F)cn1-c1ccc(S(C)(=O)=O)cc1											1	0	3.9521	10.3573	4.271	3.9521	Cc1cn2cc(CNc3ncnc4ccc(N5CCC[C@@H]5c5cc(F)ccc5F)nc34)nc2s1	3298265
CHEMBL111053	1	111053	7.0376	19.4183	7.6618	22.0296	CCNc1cc(-c2c(-c3ccc(F)cc3)nc(SC)n2C)ccn1											1	0	3.9455	10.422	4.3402	3.9455	Cc1ncc(-c2c(N)ncnc2N2CCC(c3nc(-c4ccc(F)c(C(F)(F)F)c4)cn3C)CC2)s1	3922417
CHEMBL111279	1	111279	7.1041	19.4437	7.7309	22.0973	CSc1nc(-c2ccnc(NC(C)c3ccccc3)c2)c(-c2ccc(F)cc2)n1C											1	0	3.9585	10.2312	4.5079	3.9585	Cc1nc2sccn2c1-c1c[nH]c2ncnc(N3CCOCC3)c12	3976897
CHEMBL111364	1	111364	7.2328	19.3792	7.6912	22.0686	CSc1nc(-c2ccc(F)cc2)c(-c2ccnc(NC(C)c3ccccc3)c2)[nH]1											1	0	3.9378	10.3095	4.2908	3.9378	C=CCn1cc[n+](-c2nc3ccccc3nc2[N-]S(=O)(=O)c2cccs2)c1	1468359
CHEMBL111403	1	111403	7.1318	19.4792	7.4172	22.0299	CSc1nc(-c2ccc(F)cc2)c(-c2ccnc(F)c2)[nH]1											1	0	3.9885	10.3124	4.2336	3.9885	N#Cc1cc2c(cn1)[nH]c1ncc(-c3nc(CN4CCCCC4)cs3)cc12	3582214
CHEMBL111456	1	111456	5.546	14.4337	5.4811	16.4053	C[S+]([O-])c1ccc(CSc2nc(-c3ccc(F)cc3)c(-c3ccncc3)[nH]2)cc1											1	0	4.1074	10.3804	4.4859	4.1074	Fc1cccc(-n2cnc3c(NCc4nc(-c5ccccc5)cs4)nc(N4CCOCC4)nc32)c1	4206610
CHEMBL111536	64	111536	6.7326	18.2544	6.6031	20.5463	Cn1cncc1C1CCCc2c(NS(C)(=O)=O)cccc21											1	0	3.9209	10.2506	4.2548	3.9209	Cc1cnc2c(NCCN3CCCCC3)nc3cc(-c4ccccc4)sc3n12	250336
CHEMBL111566	1	111566	5.5455	14.4423	5.4868	16.4146	C[S+]([O-])c1ccc(CSc2nc(-c3ccc(F)cc3)c(-c3ccnc(F)c3)[nH]2)cc1											1	0	3.9792	10.438	4.2638	3.9792	Cc1nc(C)c(S(=O)(=O)NC2CCN(Cc3ccc(-c4nnc5n4-c4cccnc4Nc4ccccc4-5)cc3)CC2)s1	3684462
CHEMBL111584	64	111584	6.7326	18.2544	6.6031	20.5463	Cn1cnc(C2CCCc3c(NS(C)(=O)=O)cccc32)c1											1	0	3.6824	10.5416	4.609	3.6824	C[C@@H]1C[C@H](N)CN(c2ccncc2Nc2ncc3ccc(-c4nccs4)nn23)C1	4109688
CHEMBL111644	1	111644	7.3324	19.6756	7.8554	22.4188	Fc1ccc(-c2[nH]c(SCc3ccccc3)nc2-c2ccnc(NCc3ccccc3)c2)cc1											1	0	3.6336	10.0389	4.534	3.6336	C[C@H](Nc1nc(Nc2ncc(C#N)s2)cc(N2CCOCC2)n1)c1ccc(F)cn1	1087398
CHEMBL111646	63	111646	2.2499	3.6465	2.0153	4.73502	N=C(N)NCCCC(NC(=O)[C@@H]1CC[C@H]2CN(C(=O)CCc3ccc(Cl)c(Cl)c3)CC(=O)N21)C(=O)c1nccs1											1	0	3.6536	10.1429	4.5833	3.6536	Cc1nc(N[C@@H](C)c2cccc(-c3ccnn3C)c2)cc(-c2ccc3ncsc3c2)n1	3731685
CHEMBL111682	64	111682	6.814	18.3321	6.6349	20.6523	CC(c1cccc(NS(C)(=O)=O)c1)c1c[nH]cn1											1	0	3.6419	10.1054	4.5767	3.6419	Cc1nc(NC2CCCC2)sc1-c1ccnc(Nc2ccc(N3CCOCC3)cn2)n1	4081497
CHEMBL111685	64	111685	6.8922	18.2419	6.877	20.6776	CCS(=O)(=O)Nc1cc(C2CCCCC2)cc2c1CCCC2c1c[nH]cn1											1	0	3.7023	10.157	4.5923	3.7023	Cc1cnc(Nc2cc(N3CCOCC3)nc(N[C@@H](C)c3ccc(F)cn3)n2)s1	1087269
CHEMBL112075	64	112075	6.844	18.9594	7.2223	21.4117	S=C(Nc1cccc(Cn2ccnc2)c1)c1ccccn1											1	0	3.7981	10.2753	4.633	3.7981	Cc1ncc(-c2cnc(Nc3cc(N4CCOCC4)ccn3)s2)cn1	2011338
CHEMBL112178	64	112178	7.7856	25.4561	10.319	28.5501	c1ccc(-n2nnnc2NCCc2c[nH]cn2)cc1											1	0	3.6035	10.468	4.5883	3.6035	N[C@H]1CCCN(c2ccncc2Nc2ncc3ccc(-c4nccs4)nn23)C1	3910008
CHEMBL112273	1	112273	15.0738	41.3623	16.58	47.0421	Nc1ccc2c(-c3ccncc3)c(-c3ccc(F)cc3)[nH]c2n1											1	0	3.6183	10.4949	4.6038	3.6183	c1cc(N2CCNCC2)c(Nc2ncc3ccc(-c4nccs4)nn23)cn1	3960752
CHEMBL112274	1	112274	15.0603	41.3506	16.5812	47.0279	Nc1ccc2c(-c3ccncc3)c(-c3ccc(F)c(F)c3)[nH]c2n1											1	0	3.658	10.1218	4.5809	3.658	FC(F)(F)c1nc(NC2CCCC2)sc1-c1ccnc(Nc2ccc(N3CCOCC3)cn2)n1	4104477
CHEMBL112313	64	112313	13.1359	35.1049	14.3979	40.1523	CN(C)CCN(C)c1ccnc2nc(N3CCCC3)c(F)cc12											1	0	3.6285	10.0988	4.5805	3.6285	Cc1nc(NC(C)C)sc1-c1ccnc(Nc2ccc(N3CCOCC3)cn2)n1	4100252
CHEMBL112324	64	112324	5.5584	14.8602	5.6364	16.8372	Cc1cc(N(Cc2cnc(C)n2Cc2ccc(C#N)cc2)CC2CC2)ccc1S(=O)(=O)c1ccccc1											1	0	3.9741	10.2741	4.5451	3.9741	c1nc(N2CCOCC2)c2c(-c3cnc4sccn34)c[nH]c2n1	3946246
CHEMBL112390	64	112390	2.7514	8.8406	3.4794	9.89104	c1ccc2sc(NCCc3c[nH]cn3)nc2c1											1	0	3.9798	10.3491	4.5791	3.9798	N#Cc1cccc(-c2c[nH]c3ncnc(N4CCOC(c5nccs5)C4)c23)c1	3975717
CHEMBL112504	64	112504	3.8373	13.4617	4.7687	14.7879	O=[N+]([O-])c1ccc(SCCc2c[nH]cn2)nc1											1	0	3.8391	10.9617	4.3596	3.8391	CC(C)(C)c1cc2c(N/N=C/c3nccs3)ncnc2s1	3604470
CHEMBL112564	1	112564	9.2461	26.9028	10.5866	30.3534	CN(C)Cc1c(-c2n[nH]c(-c3ccncc3)n2)nnn1-c1nonc1N											1	0	4.0587	10.9917	4.2059	4.0587	Cc1ncn(-c2ccc(Nc3ncc4cccc(-c5nccs5)c4n3)cc2)n1	1761569
CHEMBL112576	64	112576	3.845	13.4667	4.7722	14.7956	O=[N+]([O-])c1ccc(SCc2c[nH]cn2)nc1											1	0	4.0594	10.9298	4.3519	4.0594	Cc1ncc(-c2cc(F)c3nnc(C(F)(F)c4ccc5ncccc5c4)n3c2)s1	3414737
CHEMBL112577	64	112577	4.0636	13.2548	5.3102	14.8459	c1ccc(SCCc2c[nH]cn2)nc1											1	0	4.0335	10.8096	4.4021	4.0335	Cc1cnc2c(NCCN)nc3cc(-c4cn[nH]c4)sc3n12	250106
CHEMBL112814	64	112814	6.2008	16.1728	6.0148	18.3354	O=S(=O)(Nc1cccc2c1CCCC2c1c[nH]cn1)c1ccc2ccccc2c1											1	0	4.0686	10.9465	4.359	4.0686	Fc1cc(-c2cscn2)cn2c(C(F)(F)c3ccc4ncccc4c3)nnc12	3414738
CHEMBL112940	64	112940	5.6362	14.9427	5.5877	16.9196	N#Cc1ccc(Cn2cncc2CNc2ccc(S(=O)(=O)c3ccccc3)cc2)cc1											1	0	4.0339	11.0115	4.4897	4.0339	Brc1cnc(NCc2csc(-c3cccs3)n2)nc1Nc1cc(C2CC2)[nH]n1	3894208
CHEMBL113007	64	113007	3.62	12.1775	4.6501	13.5285	N#Cc1c[nH]c(-c2ccc(Br)s2)n1											1	0	4.1406	10.9769	4.2608	4.1406	Cc1cc(Nc2nccc(C(F)(F)F)n2)cc(-c2cnc(-c3cc[nH]n3)s2)c1	3685802
CHEMBL113210	64	113210	11.0912	34.2896	14.0262	38.672	Cn1cnc(CCNc2ccc(C(F)(F)F)cn2)c1											1	0	4.1336	10.6433	4.3096	4.1336	O=S(=O)(c1c(Cl)nc2sccn12)n1ccc2ncc(-c3cnn(C4CCNCC4)c3)cc21	564371
CHEMBL113236	49	113236	13.431	40.0897	17.5586	45.7808	Cc1cccn2cc(-c3ccc(NCCCN4CCCCC4)cc3)nc12											1	0	4.0015	11.2263	4.3906	4.0015	C(=N/Nc1ncnc2c1cnn2-c1nccs1)\c1ccncc1	68397
CHEMBL113329	1	113329	7.0002	19.4006	7.5912	21.9775	CCCn1c(SC)nc(-c2ccc(F)cc2)c1-c1ccnc(N)c1											1	0	3.9301	11.1637	4.2627	3.9301	FC(F)(F)c1cccc(Sc2ccc3nnc(-c4cncs4)n3n2)c1	2348945
CHEMBL113419	1	113419	7.1393	19.4904	7.4246	22.0447	CSc1nc(-c2ccc(F)cc2)c(-c2ccncc2)[nH]1											1	0	4.0426	11.2429	4.3381	4.0426	CC(C)(C)c1cccc(Sc2ccc3nnc(-c4cncs4)n3n2)c1	2348966
CHEMBL114086	64	114086	5.6903	14.9501	5.6897	16.9782	Cc1cc(NCc2cnc(C)n2Cc2ccc(C#N)cc2)ccc1S(=O)(=O)c1ccccc1											1	0	4.0854	11.0296	4.3176	4.0854	FC(F)(F)c1ccc(-c2ncc(CNc3ncc(Br)c(Nc4cc(C5CC5)[nH]n4)n3)s2)cc1	3929415
CHEMBL114162	64	114162	5.5152	14.9187	5.4631	16.8176	CS(=O)(=O)c1ccc(-c2cncn2-c2ccc(F)cc2)cc1											1	0	3.9044	11.0477	4.2259	3.9044	FC(F)(F)c1cccc(Sc2ccc3nnc(-c4nccs4)n3n2)c1	2348946
CHEMBL114783	64	114783	5.4514	14.8343	5.4571	16.7199	CS(=O)(=O)c1ccc(-c2cnc(Cl)n2-c2ccc(F)cc2)cc1											1	0	4.3732	10.5412	4.2093	4.3732	N[C@H]1CCCN(c2ccncc2Nc2cccc3cnc(-c4cccc(-c5nccs5)c4)nc23)C1	3685751
CHEMBL115016	64	115016	6.8729	18.988	7.2439	21.4536	Fc1ccc(NC(=S)c2ccccn2)cc1Cn1ccnc1											1	0	4.2441	10.9689	4.1837	4.2441	CNc1nnc(-c2ccc3[nH]cc(-c4csc(-n5cnc(C)c5)n4)c3c2)s1	3921086
CHEMBL115212	64	115212	12.0996	35.5684	14.5037	40.2724	FC(F)(F)c1ccc(N2CCC(c3c[nH]cn3)CC2)nc1											1	0	4.1709	11.0074	4.4826	4.1709	Cc1cccc(CNc2nc(-c3cccc(C)n3)c(-c3ccc4ncnn4c3)s2)c1	2087968
CHEMBL115262	64	115262	6.3642	16.0477	6.424	18.4201	O=S(=O)(c1ccc2cc[nH]c2c1)N1CCC[C@@H]1CCN1CCC(n2c(O)nc3ccccc32)CC1											1	0	4.3265	11.0221	4.5152	4.3265	Nc1nc2c(s1)CC(n1nc(-c3cc(F)c4[nH]ccc4c3)c3c(N)ncnc31)CC2	4216036
CHEMBL115420	64	115420	17.0786	53.0743	21.4855	59.751	FC(F)(F)c1ccc2c(Cn3ccnc3)c[nH]c2c1											1	0	4.3244	10.8722	4.4207	4.3244	c1csc(CNc2ccc3[nH]nc(-c4nc5cc(N6CCC(N7CCCCC7)CC6)ccc5[nH]4)c3c2)n1	376945
CHEMBL115509	1	115509	13.4413	40.1008	16.7808	45.501	COc1nccc(-c2c(-c3ccccc3)nc3nc(N)ccn23)n1											1	0	4.1943	10.8262	4.4399	4.1943	Cc1cccc(-c2sc(NCc3ccccc3)nc2-c2ccc3ncnn3c2)n1	2088221
CHEMBL1161138	64	1161138	10.0155	27.8656	11.078	31.6152	N=C(NN=Cc1ccc(-c2cn3cc(C=NNC(=N)N4CCCC4)ccc3n2)cc1)N1CCCC1											1	0	4.1772	10.7617	4.4535	4.1772	c1cc[n+]2cc(CN3CCC(c4nnn5cnc6[nH]ccc6c45)CC3)sc2c1	4115251
CHEMBL1161139	64	1161139	11.8779	37.0239	15.8287	41.981	N=C(c1ccc(-c2cn3ccccc3n2)cc1)N1CCCC1											1	0	4.1692	10.965	4.5039	4.1692	Cc1cccc(-c2nc(NCc3cccc(C#N)c3)sc2-c2ccc3ncnn3c2)n1	2087971
CHEMBL1161140	64	1161140	9.9932	27.6626	10.9304	31.3777	C(=NNC1=NCCCN1)c1ccc(-c2cn3cc(C=NNC4=NCCCN4)ccc3n2)cc1											1	0	4.2076	10.8328	4.4483	4.2076	c1cc2c(ncn3nnc(C4CCN(Cc5cncs5)CC4)c23)[nH]1	3983078
CHEMBL1161143	64	1161143	10.0259	26.8497	11.3413	30.8229	C(=NNc1ccccn1)c1ccc(-c2cn3cc(C=NNc4ccccn4)ccc3n2)cc1											1	0	4.1738	11.0275	4.4977	4.1738	Cc1cccc(-c2nc(NCc3ccccc3)sc2-c2ccc3ncnn3c2)n1	2087965
CHEMBL1161144	64	1161144	10.0417	27.7625	11.0393	31.5192	CC(C)NC(=N)NN=Cc1ccc(-c2cn3cc(C=NNC(=N)NC(C)C)ccc3n2)cc1											1	0	4.4201	10.876	4.231	4.4201	CS(=O)(=O)CCNc1nc(-c2ccc3ncnc(Nc4ccc5c(cnn5Cc5ccccc5)c4)c3c2)cs1	160303
CHEMBL1161145	64	1161145	13.118	39.0963	16.4552	44.4002	CC(C)NC(=N)c1ccc(/C=C/c2cn3cc(C(=N)NC(C)C)ccc3n2)cc1											1	0	4.1875	11.0177	4.4849	4.1875	Cc1cccc(-c2nc(NCc3cccc(C)c3C)sc2-c2ccc3ncnn3c2)n1	2088214
CHEMBL1161146	64	1161146	11.9495	37.3301	15.8376	42.2748	N=C(c1ccc(-c2cn3cc(C(=N)N4CCCC4)ccc3n2)cc1)N1CCCC1											1	0	4.2123	10.79	4.2536	4.2123	c1cn2c(NC3CCCCC3)c(-c3ccc4[nH]ncc4c3)nc2s1	1682556
CHEMBL1161147	64	1161147	7.1448	19.7719	7.9443	22.4742	C(=NNC1=NCCS1)c1ccc(-c2cn3cc(C=NNC4=NCCS4)ccc3n2)cc1											1	0	4.1684	10.9686	4.5061	4.1684	Brc1ccc2c(c1)-c1ncnn1Cc1c(-c3cccs3)ncn1-2	1078472
CHEMBL1161148	64	1161148	9.8916	27.4078	10.795	31.0735	C(=NNC1=NCCC1)c1ccc(-c2cn3cc(C=NNC4=NCCC4)ccc3n2)cc1											1	0	4.1742	10.9864	4.493	4.1742	O=S(=O)(Nc1ccc(-c2ccc3nncn3n2)cc1)c1cccs1	1888074
CHEMBL1161149	64	1161149	12.6858	38.9549	16.4046	44.1308	c1cc(-c2cn3cc(C4=NCCN4)ccc3n2)ccc1C1=NCCN1											1	0	4.2235	10.8364	4.4721	4.2235	c1cc2c(ncn3nnc(C4CCN(Cc5cscn5)CC4)c23)[nH]1	3979388
CHEMBL1161150	64	1161150	6.8473	19.3272	7.5158	21.8383	C(=Cc1ccc(-c2cn3ccccc3n2)cc1)C1=NCCS1											1	0	4.4545	10.8777	4.2566	4.4545	CS(=O)(=O)CCNCc1nc(-c2ccc3ncnc(Nc4ccc5c(cnn5Cc5ccccc5)c4)c3c2)cs1	472581
CHEMBL1161151	64	1161151	12.4191	38.4548	16.2978	43.5732	C(=Cc1ccc(-c2cn3ccccc3n2)cc1)C1=NCCN1											1	0	4.1764	11.0222	4.4859	4.1764	Cc1ccc(CNc2nc(-c3cccc(C)n3)c(-c3ccc4ncnn4c3)s2)cc1	2087974
CHEMBL1161152	64	1161152	13.3116	39.9433	16.8243	45.3401	c1ccn2cc(-c3ccc(C4=NCCCN4)cc3)nc2c1											1	0	4.2316	10.8494	4.4713	4.2316	Brc1ncc(CN2CCC(c3nnn4cnc5[nH]ccc5c34)CC2)s1	3931093
CHEMBL1161153	64	1161153	9.8145	27.4478	10.983	31.1502	C(=NNC1=NCCN1)c1ccc2nc(-c3ccccc3)cn2c1											1	0	4.2076	10.8328	4.4483	4.2076	c1cc2c(ncn3nnc(C4CCN(Cc5cncs5)CC4)c23)[nH]1	3983078
CHEMBL1161154	64	1161154	10.0164	27.8622	11.1166	31.6261	N=C(NN=C/C=C/c1ccc(-c2cn3cc(/C=C/C=NNC(=N)N4CCCC4)ccc3n2)cc1)N1CCCC1											1	0	4.2122	10.8468	4.46	4.2122	c1csc(CN2CCC(c3nnn4cnc5[nH]ccc5c34)CC2)n1	3981443
CHEMBL1161157	64	1161157	11.9175	37.4001	15.8568	42.3348	N=C(/C=C/c1ccc(-c2cn3cc(/C=C/C(=N)N4CCCC4)ccc3n2)cc1)N1CCCC1											1	0	4.19	11.0395	4.5097	4.19	Cc1cccc(-c2nc(NCc3cccc(F)c3)sc2-c2ccc3ncnn3c2)n1	2087966
CHEMBL1161160	64	1161160	12.4357	38.5479	16.103	43.5878	c1ccn2cc(-c3ccc(C4=NCCN4)cc3)nc2c1											1	0	4.1907	11.0646	4.4884	4.1907	Cc1cccc(-c2nc(NCc3ccccc3C)sc2-c2ccc3ncnn3c2)n1	2087980
CHEMBL1161161	64	1161161	9.9254	27.6215	11.0444	31.3598	C(=NNC1=NCCN1)c1ccc(-c2cn3ccccc3n2)cc1											1	0	4.1932	11.0454	4.5088	4.1932	Cc1cccc(-c2nc(NCc3cccc(F)c3F)sc2-c2ccc3ncnn3c2)n1	2087982
CHEMBL1161162	64	1161162	10.0352	27.7846	11.0425	31.5377	C(=NNC1=NCCN1)c1ccc(-c2cn3cc(C=NNC4=NCCN4)ccc3n2)cc1											1	0	4.1943	11.1206	4.5194	4.1943	Cc1cccc(-c2sc(NCc3ccccc3)nc2-c2ccc3ncnn3c2)n1	2088221
CHEMBL1161164	64	1161164	9.9758	27.5718	11.052	31.3348	C(=NNC1=NCCCN1)c1ccc(-c2cn3ccccc3n2)cc1											1	0	4.19	11.0395	4.5097	4.19	Cc1cccc(-c2nc(NCc3cccc(F)c3)sc2-c2ccc3ncnn3c2)n1	2087966
CHEMBL1161167	64	1161167	11.6806	36.52	15.4902	41.3533	N=C(c1ccc(/C=C/c2cn3cc(C(=N)N4CCCC4)ccc3n2)cc1)N1CCCC1											1	0	4.1932	11.0454	4.5088	4.1932	Cc1cccc(-c2nc(NCc3cccc(F)c3F)sc2-c2ccc3ncnn3c2)n1	2087982
CHEMBL1161168	64	1161168	9.8767	27.6012	10.9037	31.2772	C(=NNC1=NCCCN1)c1ccc(/C=C/c2cn3cc(C=NNC4=NCCCN4)ccc3n2)cc1											1	0	4.1757	11.0343	4.5182	4.1757	Cc1cccc(-c2sc(NCc3cccc(C#N)c3)nc2-c2ccc3ncnn3c2)n1	2088222
CHEMBL1161169	64	1161169	9.9378	27.7343	11.0458	31.4636	C(=NNC1=NCCN1)c1ccc(/C=C/c2cn3cc(C=NNC4=NCCN4)ccc3n2)cc1											1	0	4.1932	11.0454	4.5088	4.1932	Cc1cccc(-c2nc(NCc3cccc(F)c3F)sc2-c2ccc3ncnn3c2)n1	2087982
CHEMBL1161170	64	1161170	9.3858	27.2823	10.8193	30.8135	N=C(NN=Cc1ccc2nc(C=NNC(=N)N3CCCC3)cn2c1)N1CCCC1											1	0	4.19	11.0395	4.5097	4.19	Cc1cccc(-c2nc(NCc3cccc(F)c3)sc2-c2ccc3ncnn3c2)n1	2087966
CHEMBL1161171	64	1161171	9.3217	27.1507	10.8554	30.6903	C(=NNC1=NCCN1)c1ccc2nc(C=NNC3=NCCN3)cn2c1											1	0	4.5847	10.8134	4.2711	4.5847	Cc1nc(C)c(-c2c(C)sc3c(NC[C@@H](N)Cc4ccccc4)nc(-c4ccncc4)nc23)s1	3733268
CHEMBL1161172	64	1161172	9.3241	27.0986	10.7906	30.6221	C(=NNC1=NCCCN1)c1ccc2nc(C=NNC3=NCCCN3)cn2c1											1	0	4.6147	10.8849	4.3224	4.6147	Cc1cc2c(-c3ccc(S(=O)(=O)NCCN)s3)ccnc2[nH]1	3330172
CHEMBL1161173	64	1161173	6.8454	19.2101	7.5335	21.7403	C(=Cc1ccc(-c2cn3cc(C=CC4=NCCS4)ccc3n2)cc1)C1=NCCS1											1	0	4.6798	11.0169	4.3791	4.6798	c1cnc2sc3c(N4CCCNCC4)nc(-c4ccncc4)nc3c2c1	3730226
CHEMBL1161174	64	1161174	10.0352	27.7846	11.0425	31.5377	C(/C=C/c1ccc(-c2cn3cc(/C=C/C=NNC4=NCCN4)ccc3n2)cc1)=NNC1=NCCN1											1	0	4.6492	10.9538	4.369	4.6492	c1cnc2sc3c(N4CCNCC4)nc(-c4ccncc4)nc3c2c1	3732646
CHEMBL1161175	64	1161175	9.9932	27.6626	10.9304	31.3777	C(/C=C/c1ccc(-c2cn3cc(/C=C/C=NNC4=NCCCN4)ccc3n2)cc1)=NNC1=NCCCN1											1	0	4.6417	10.9849	4.3813	4.6417	Cc1cc(C)c2c(n1)sc1c(N3CCNCC3)nc(-c3ccncc3)nc12	3729415
CHEMBL1161176	64	1161176	12.4525	38.1165	16.1433	43.2266	C(=C/c1cn2cc(C3=NCCN3)ccc2n1)\c1ccc(C2=NCCN2)cc1											1	0	4.6907	11.0239	4.3707	4.6907	C[C@H](N)CNc1nc(-c2ccncc2)nc2c1sc1ncccc12	3729301
CHEMBL1161177	64	1161177	10.0041	27.6756	11.1375	31.4653	N=C(NN=Cc1ccc(-c2cn3ccccc3n2)cc1)N1CCCC1											1	0	4.6907	11.0239	4.3707	4.6907	C[C@H](N)CNc1nc(-c2ccncc2)nc2c1sc1ncccc12	3729301
CHEMBL1161178	64	1161178	9.8633	27.4044	10.9904	31.13	C(=NNC1=NCCCN1)c1ccc2nc(-c3ccccc3)cn2c1											1	0	4.619	11.238	4.2113	4.619	Nc1ncnc2c1sc1ncc(-c3ccccc3)cc12	507635
CHEMBL1161180	64	1161180	11.6526	36.2063	15.4692	41.0606	N=C(c1ccc2nc(-c3ccccc3)cn2c1)N1CCCC1											1	0	4.7129	11.0522	4.3855	4.7129	NCCNc1nc(-c2ccncc2)nc2c1sc1ncccc12	3728384
CHEMBL1161181	64	1161181	12.3324	37.97	15.8989	42.9719	c1ccc(-c2cn3cc(C4=NCCN4)ccc3n2)cc1											1	0	4.6231	11.2314	4.2147	4.6231	Cc1ccc2nc(C(C)(C)C)c(Cc3ccsc3)n2c1	1891528
CHEMBL116126	64	116126	11.661	34.8782	13.8656	39.303	FC(F)(F)c1ccc(NCCc2c[nH]cn2)nc1											1	0	4.6685	11.0498	4.3541	4.6685	N[C@H](CNc1nc(-c2ccncc2)nc2sc3c(c12)CCCC3)Cc1cscn1	3729660
CHEMBL1163248	64	1163248	2.8633	11.2857	4.7919	12.5908	Cn1cc[n+](C)c1/C=C/c1ccc(-c2cccs2)s1.[I-]											1	0	4.6806	11.0518	4.3828	4.6806	Cc1ccc(Nc2c(-c3ccc(C)s3)nc3ncccn23)cc1	1573981
CHEMBL116343	64	116343	5.4756	14.8517	5.4775	16.7499	Cc1ncc(-c2ccc(S(C)(=O)=O)cc2)n1-c1ccc(F)cc1											1	0	4.6786	11.0561	4.3954	4.6786	Cc1cc(C)c2c(n1)sc1c(N3CCCNCC3)nc(-c3ccncc3)nc12	3728474
CHEMBL1163558	64	1163558	9.9863	32.7635	13.4112	36.7836	Cn1cccc1/C=C/c1n(C)cc[n+]1C.[I-]											1	0	4.6806	11.0518	4.3828	4.6806	Cc1ccc(Nc2c(-c3ccc(C)s3)nc3ncccn23)cc1	1573981
CHEMBL1163563	64	1163563	2.7929	11.288	4.456	12.4529	Cn1cc[n+](C)c1/C=C/c1ccc(Br)s1.[I-]											1	0	4.1683	10.8657	4.5473	4.1683	Nc1nc(Nc2ccc(N3CCN(C4CC5CCC4C5)CC3)cc2)nn1-c1ncnc2c1sc1ncccc12	4071242
CHEMBL1163613	64	1163613	2.9557	11.4554	5.0146	12.8495	Cn1cc[n+](C)c1/C=C/c1ccc(-c2ccccc2)s1.[I-]											1	0	4.2963	10.8402	4.6943	4.2963	Cc1ncc(-c2ccc3[nH]nc(-c4cc(N5CCOCC5)ncn4)c3c2)s1	3942757
CHEMBL1163616	64	1163616	2.968	11.4664	5.0703	12.8839	Cn1cc[n+](C)c1/C=C/c1cc(-c2ccccc2)cs1.[I-]											1	0	4.3459	10.8206	4.6189	4.3459	Cn1nccc1CSc1nc(N)c2c3c(sc2n1)CC(C(C)(C)C)CC3	4174860
CHEMBL1163925	64	1163925	4.0247	10.2557	4.0059	11.7228	N#Cc1c(Nc2nccs2)nc(SCc2nc3ccccc3[nH]2)nc1-c1ccccc1											1	0	4.2528	10.7174	4.6191	4.2528	c1cc2c(ncn3nnc(C4CCN(Cc5cnc(N6CCOCC6)s5)CC4)c23)[nH]1	3975123
CHEMBL1163926	64	1163926	7.4543	19.5618	7.9486	22.3922	N#Cc1c(Nc2ccccn2)nc(SCc2nc3ccccc3[nH]2)nc1-c1ccccc1											1	0	4.2934	10.8258	4.6791	4.2934	CC(C)c1cc2c(NCCN)nc(-c3ccncc3)nc2s1	3731554
CHEMBL1164417	64	1164417	10.973	34.7369	14.6933	39.2804	N#Cc1cc2ccncc2n2c1nc1ccccc12											1	0	4.3149	11.4675	4.6773	4.3149	C[C@H](N)CNc1nc(-c2cn[nH]c2)nc2sc3c(c12)CCCC3	3730379
CHEMBL1164652	64	1164652	10.3007	32.119	13.3943	36.2924	Cc1ncc(-c2ccnc(Nc3ccccc3)n2)n1C(C)C											1	0	4.3512	11.4815	4.7245	4.3512	c1n[nH]cc1-c1nc(N2CCNCC2)c2c3c(sc2n1)CCCC3	3733303
CHEMBL1164877	64	1164877	2.9912	7.7445	4.2315	9.31827	CC(=O)Nc1c(C#N)sc2nc3ccccc3n12											1	0	4.3149	11.4675	4.6773	4.3149	C[C@H](N)CNc1nc(-c2cn[nH]c2)nc2sc3c(c12)CCCC3	3730379
CHEMBL1165072	64	1165072	4.7667	14.5851	5.632	16.3452	Cn1nnnc1Sc1ccncc1S(N)(=O)=O											1	0	4.2904	11.4567	4.6058	4.2904	c1n[nH]cc1-c1nc(N2CCCNCC2)c2c3c(sc2n1)CCCC3	3730408
CHEMBL1165374	1	1165374	18.0694	52.1091	21.7098	59.2721	Cc1cccc(-c2[nH]c(Cc3cccc(C#N)c3)nc2-c2ccc3ncccc3c2)n1											1	0	4.3435	11.2334	4.6307	4.3435	Nc1nc2c(s1)CC(n1nc(-c3cnc4[nH]ccc4c3)c3c(N)ncnc31)CC2	4207205
CHEMBL1165679	64	1165679	7.4543	19.5618	7.9486	22.3922	N#Cc1c(Nc2ccncc2)nc(SCc2nc3ccccc3[nH]2)nc1-c1ccccc1											1	0	4.2152	11.1398	4.527	4.2152	FC(F)(F)c1nnc2c(Sc3ccccn3)nc3ccccc3n12	1440503
CHEMBL116794	64	116794	16.5146	50.6731	20.2008	56.9962	c1ccc2c(Cn3ccnc3)c[nH]c2c1											1	0	4.2758	11.4213	4.6345	4.2758	NCCNc1nc(-c2cn[nH]c2)nc2sc3c(c12)CCCC3	3728291
CHEMBL116843	64	116843	4.0117	13.7695	5.5142	15.3655	CS(=O)(=O)c1ccccc1NCc1c[nH]cn1											1	0	4.2332	11.4923	4.6612	4.2332	Cn1cc(-c2nc(NCCN)c3c4c(sc3n2)CCCC4)cn1	3728060
CHEMBL1169541	64	1169541	5.047	13.3931	5.1113	15.1978	Cn1cncc1CN1C[C@@H](N(Cc2ccsc2)S(=O)(=O)c2ccccc2)Cc2cc(C#N)ccc21											1	0	3.9406	12.0697	4.3883	3.9406	Brc1cc2c(NCc3ccncc3)ncnc2s1	3416614
CHEMBL1169754	1	1169754	9.8648	26.7829	10.527	30.4213	NCc1cccc(-c2cn3c(-c4cn[nH]c4)cnc3cn2)c1											1	0	3.9434	12.2227	4.4101	3.9434	Brc1cc2c(NCc3ccccn3)ncnc2s1	3416616
CHEMBL1169926	1	1169926	10.0201	26.9845	10.6243	30.6829	Nc1cccc(-c2cnc3cnc(-c4cn[nH]c4)cn23)c1											1	0	3.9422	12.0671	4.3863	3.9422	Brc1cc2c(NCc3cccnc3)ncnc2s1	3416615
CHEMBL1169927	1	1169927	10.008	26.9763	10.617	30.6692	Nc1ccc(-c2cnc3cnc(-c4cn[nH]c4)cn23)cc1											1	0	3.9843	12.2457	4.4166	3.9843	C[C@@H](Nc1ncnc2sc(Br)cc12)c1ccccn1	3416617
CHEMBL1170093	64	1170093	4.3719	12.198	5.7605	14.1806	COCCNc1nc2c(S(=O)(=O)c3ccccc3)nnn2c2ccsc12											1	0	3.822	12.2854	4.8672	3.822	c1csc(-c2cc3[nH]ccnc-3n2)c1	74015
CHEMBL1170106	64	1170106	5.5152	14.9187	5.4631	16.8176	CS(=O)(=O)c1ccc(-c2cncn2-c2cccc(F)c2)cc1											1	0	4.0703	12.6425	4.5405	4.0703	CN(C)CCNc1nc(-c2ccncc2)nc2c(Br)csc12	3729827
CHEMBL1170125	1	1170125	9.3374	26.6591	11.0385	30.3273	c1c[nH]c(-c2cnc3cnc(-c4cn[nH]c4)cn23)c1											1	0	4.09	12.6742	4.5451	4.09	Brc1csc2c(N[C@H]3CCNC3)nc(-c3ccncc3)nc12	3729098
CHEMBL1170275	64	1170275	4.4225	12.1964	5.753	14.1918	COCCCNc1nc2c(S(=O)(=O)c3ccccc3)nnn2c2ccsc12											1	0	4.0642	12.6343	4.5403	4.0642	NCCNc1nc(-c2ccncc2)nc2c(Br)csc12	3732082
CHEMBL1170293	1	1170293	10.0201	26.9845	10.6243	30.6829	Nc1cccc(-c2cn3c(-c4cn[nH]c4)cnc3cn2)c1											1	0	4.0917	12.676	4.5454	4.0917	Brc1csc2c(NC[C@@H]3CCCN3)nc(-c3ccncc3)nc12	3727923
CHEMBL1170316	1	1170316	12.0657	38.165	16.0374	43.1201	c1ccc(-c2cnc3cnc(-c4cccnc4)cn23)cc1											1	0	4.0917	12.676	4.5454	4.0917	Brc1csc2c(NC[C@@H]3CCCN3)nc(-c3ccncc3)nc12	3727923
CHEMBL1170439	64	1170439	5.0931	12.8002	5.7804	14.9398	COCCNc1nc2c(S(=O)(=O)c3ccc(C)cc3)nnn2c2ccsc12											1	0	4.09	12.6742	4.5451	4.09	Brc1csc2c(N[C@H]3CCNC3)nc(-c3ccncc3)nc12	3729098
CHEMBL1170531	1	1170531	9.2868	26.1778	10.1981	29.5892	Cn1cc(-c2cn3c(-c4ccccc4)cnc3cn2)cn1											1	0	4.1687	11.825	4.8071	4.1687	CC(C)c1cc2c(N/N=C\c3cccnc3)ncnc2s1	460640
CHEMBL1170532	1	1170532	9.3795	26.1681	10.2508	29.6281	c1ccc(Cn2cc(-c3cn4c(-c5ccccc5)cnc4cn3)cn2)cc1											1	0	4.426	12.2206	4.8123	4.426	NCCNc1ccn2ncc(-c3ccc(-c4ccccc4)s3)c2n1	2442288
CHEMBL1170533	1	1170533	13.45	40.3298	16.4187	45.5738	c1ccc(-c2cnc3cnc(-c4ccc[nH]4)cn23)cc1											1	0	4.1856	11.8171	4.8265	4.1856	CC(C)(C)c1cc2c(N/N=C\c3cccnc3)ncnc2s1	461685
CHEMBL1170534	1	1170534	16.1292	47.4578	19.6116	53.8239	c1ccc(-c2cnc3cnc(-c4c[nH]c5ccccc45)cn23)cc1											1	0	4.2837	12.2191	4.8406	4.2837	N#Cc1cnn2c(N)cc(-c3cccs3)nc12	2062555
CHEMBL1170728	1	1170728	9.2492	26.2627	10.9623	29.9241	c1cc(-c2cn3c(-c4cn[nH]c4)cnc3cn2)ccn1											1	0	4.1905	11.8186	4.8251	4.1905	CC(C)c1cc2c(N/N=C\c3ccncc3)ncnc2s1	512390
CHEMBL1170741	1	1170741	12.0657	38.165	16.0374	43.1201	c1ccc(-c2cnc3cnc(-c4ccccn4)cn23)cc1											1	0	4.3595	11.5091	4.6431	4.3595	CNCC[C@H](O)Cn1cc(-c2cccs2)nc1CCc1nc2cccc(C)n2n1	3668951
CHEMBL1170747	1	1170747	9.9287	26.9101	10.6075	30.5819	NCc1ccc(-c2cn3c(-c4cn[nH]c4)cnc3cn2)cc1											1	0	4.3713	12.0578	4.8023	4.3713	c1cc(-c2cnn3cc(C4CCCCC4)cnc23)cs1	330042
CHEMBL1170750	1	1170750	9.9003	26.9391	10.6089	30.5987	c1ccc(-c2cnc3cnc(-c4cc[nH]n4)cn23)cc1											1	0	4.3059	12.009	4.72	4.3059	CC(C)c1cc2c(-n3ccc(-c4cccs4)n3)ncnc2s1	460426
CHEMBL1170948	64	1170948	2.7662	8.3546	4.7203	9.98661	O=c1[nH]n2c(-c3ccc(S(=O)(=O)c4ccc(Br)cc4)cc3)nnc2sc1=O											1	0	4.4631	12.2855	4.7707	4.4631	NCCNc1ccn2ncc(-c3ccc4sccc4c3)c2n1	2442302
CHEMBL1170998	64	1170998	7.8215	23.9679	9.6569	26.998	C/C(=N\c1n[nH]c(/N=C(\C)c2ccccn2)n1)c1ccccn1											1	0	4.5584	12.1926	4.8673	4.5584	Cn1cc(-c2cnc3nnn(Cc4cc5cccnc5s4)c3n2)cn1	3334559
CHEMBL1171092	64	1171092	5.0811	12.7803	5.7813	14.919	COCCNc1nc2c(S(=O)(=O)c3ccc(C)c(C)c3)nnn2c2ccsc12											1	0	4.455	12.4314	4.8215	4.455	Cc1cccc(-n2ncc3c(NCc4cccs4)ncnc32)c1	1359573
CHEMBL117146	64	117146	5.4709	14.8584	5.481	16.7554	CS(=O)(=O)c1ccc(-c2cnc(C#N)n2-c2ccc(F)cc2)cc1											1	0	4.6431	12.6424	4.7687	4.6431	FC(F)(F)c1cccc(Sc2ccc3cnc(-c4cccs4)n3n2)c1	2348940
CHEMBL1171506	63	1171506	3.1803	9.8543	3.9672	11.0887	c1cnc2nc(-c3nccs3)[nH]c2c1											1	0	4.5811	12.573	4.7228	4.5811	Fc1ccc(Cc2nnc3ncc(-c4cccs4)nn23)cc1	1823126
CHEMBL1171530	64	1171530	5.3851	14.879	5.232	16.6661	CS(=O)(=O)c1ccc(-n2cncc2-c2ccc(Br)cc2)cc1											1	0	4.5374	12.5396	4.7902	4.5374	FC(F)(F)c1cccc(Sc2ccc3ncc(-c4cccs4)n3n2)c1	2348939
CHEMBL1171531	1	1171531	9.4269	26.485	10.8577	30.1365	c1cncc(-c2cnc3ncc(-c4cn[nH]c4)cn23)c1											1	0	4.556	12.6635	4.8069	4.556	Fc1ccc(Cn2nnc3ncc(-c4cccs4)nc32)cc1	1822378
CHEMBL1171534	1	1171534	9.255	26.6837	10.7963	30.2363	c1cc(-c2cnc3ncc(-c4cn[nH]c4)cn23)n[nH]1											1	0	4.593	12.4531	4.8485	4.593	O=[N+]([O-])c1ccccc1SSc1n[nH]c(-c2ccncc2)n1	2230010
CHEMBL1171706	64	1171706	5.5405	14.9681	5.4955	16.8802	CS(=O)(=O)c1ccc(-c2cncn2-c2ccc(S(C)(=O)=O)cc2)cc1											1	0	4.6992	12.8547	4.8186	4.6992	CS(=O)(=O)c1cnc2c(S(=O)(=O)c3ccccc3)cnn2c1N	1585250
CHEMBL1171707	64	1171707	5.5142	14.9229	5.4657	16.8218	CS(=O)(=O)c1ccc(-c2cncn2-c2ccc(F)cc2F)cc1											1	0	4.742	13.0136	4.6243	4.742	O=[N+]([O-])c1ccccc1CSc1nc(O)nc2nc[nH]c12	427481
CHEMBL1171711	64	1171711	5.5152	14.9187	5.4631	16.8176	CS(=O)(=O)c1ccc(-c2cncn2-c2ccccc2F)cc1											1	0	4.2349	11.9357	4.8904	4.2349	CS(=O)(=O)c1cccc(Nc2ncnc3ccc(-c4cncs4)cc23)c1	3426083
CHEMBL1171714	64	1171714	5.3652	14.8585	5.2453	16.6455	CS(=O)(=O)c1ccc(-c2cncn2-c2ccc(Br)cc2)cc1											1	0	4.2978	12.0198	5.0454	4.2978	CC(C)Cc1csc2nc(-c3ccncc3)nc(NC[C@H](C)N)c12	3730633
CHEMBL1171751	64	1171751	7.5583	24.1965	9.6549	27.1259	C(=N/c1n[nH]c(/N=C/c2ccc[nH]2)n1)\c1ccc[nH]1											1	0	4.2174	11.9406	4.8726	4.2174	CC(C)c1cc2c(N/N=C\c3ccccn3)ncnc2s1	512389
CHEMBL1171752	64	1171752	7.7068	23.9268	9.5611	26.8943	C(=N/c1n[nH]c(/N=C/c2ccccn2)n1)\c1ccccn1											1	0	4.2978	12.0198	5.0454	4.2978	CC(C)Cc1csc2nc(-c3ccncc3)nc(NC[C@H](C)N)c12	3730633
CHEMBL1171943	64	1171943	18.1945	52.4205	21.7799	59.6097	Cc1cccc(-c2[nH]c(Cc3cccc(C#N)c3)nc2-c2ccnc3ccccc23)n1											1	0	4.2757	11.9658	5.0265	4.2757	CCc1c(C)sc2nc(-c3ccncc3)nc(NC[C@H](C)N)c12	3730909
CHEMBL1171992	64	1171992	5.0436	12.7101	5.7829	14.8468	COCCCNc1nc2c(S(=O)(=O)c3ccc(C)c(C)c3)nnn2c2ccsc12											1	0	4.3209	12.0932	5.0843	4.3209	c1nc(N2CCOC(Cn3cncn3)C2)c2sccc2n1	3461508
CHEMBL1172089	1	1172089	9.7775	26.7941	10.5535	30.4122	c1ccc(-c2cn3c(-c4cn[nH]c4)cnc3cn2)cc1											1	0	4.2363	11.9363	4.989	4.2363	CNc1nc(C)nc2c(-c3cccs3)cnn12.Cl	1203963
CHEMBL1172090	1	1172090	9.4543	26.8486	11.154	30.5719	Cc1[nH]ncc1-c1cn2c(-c3cn[nH]c3)cnc2cn1											1	0	4.2262	11.9517	4.9752	4.2262	CCN1CCc2c(sc3nc(-c4ccncc4)nc(NCCN)c23)C1	3729873
CHEMBL1172286	1	1172286	10.008	26.9763	10.617	30.6692	Nc1ccc(-c2cn3c(-c4cn[nH]c4)cnc3cn2)cc1											1	0	4.2757	11.9658	5.0265	4.2757	CCc1c(C)sc2nc(-c3ccncc3)nc(NC[C@H](C)N)c12	3730909
CHEMBL1172462	64	1172462	5.5098	14.9375	5.4713	16.8351	CS(=O)(=O)c1ccc(-n2cncc2-c2ccc(F)cc2F)cc1											1	0	4.2255	11.9675	4.9588	4.2255	NCCNc1nc(-c2ccncc2)nc2sc3c(c12)CCSC3	3728535
CHEMBL1172463	64	1172463	5.5098	14.9375	5.4713	16.8351	CS(=O)(=O)c1ccc(-n2cncc2-c2ccc(F)c(F)c2)cc1											1	0	4.219	11.9939	4.9505	4.219	Cc1csc2nc(-c3ccncc3)nc(N3CCCNCC3)c12	3732514
CHEMBL1172464	1	1172464	9.7775	26.7941	10.5535	30.4122	c1ccc(-c2cnc3cnc(-c4cn[nH]c4)cn23)cc1											1	0	4.4413	11.9164	5.0752	4.4413	Brc1cnccc1CN1CCN(c2nc(-c3ccncc3)nc3sc4c(c23)CCCC4)CC1	3729171
CHEMBL1172659	64	1172659	5.5142	14.9229	5.4657	16.8218	CS(=O)(=O)c1ccc(-c2cncn2-c2ccc(F)c(F)c2)cc1											1	0	4.4326	12.2643	4.8738	4.4326	c1cc(-c2cnn3cc(-c4ccsc4)cnc23)ccn1	4081227
CHEMBL1172660	64	1172660	5.5198	14.8995	5.4719	16.8049	Cc1ccc(-c2cncn2-c2ccc(S(C)(=O)=O)cc2)cc1											1	0	4.3212	12.088	5.083	4.3212	CC(C)c1cc2c(NC[C@@H](C)N)nc(-c3ccncc3)nc2s1	3728284
CHEMBL1172662	64	1172662	5.5021	14.8905	5.4404	16.7809	CS(=O)(=O)c1ccc(-c2cncn2-c2ccccc2)cc1											1	0	4.2757	11.9658	5.0265	4.2757	CCc1c(C)sc2nc(-c3ccncc3)nc(NC[C@H](C)N)c12	3730909
CHEMBL1172663	64	1172663	5.5385	14.9306	5.4515	16.832	Cc1ccc(-n2cncc2-c2ccc(S(C)(=O)=O)cc2)cc1											1	0	4.2349	11.9357	4.8904	4.2349	CS(=O)(=O)c1cccc(Nc2ncnc3ccc(-c4cncs4)cc23)c1	3426083
CHEMBL1172865	64	1172865	5.067	12.7515	5.7617	14.8819	COCCNc1nc2c(S(=O)(=O)c3ccc(C(C)C)cc3)nnn2c2ccsc12											1	0	4.2029	12.1401	4.9018	4.2029	Brc1cnc(NCCc2cccs2)nc1Nc1cc(C2CC2)n[nH]1	3910473
CHEMBL1172868	64	1172868	5.0825	12.7958	5.8581	14.9627	COCCCNc1nc2c(S(=O)(=O)c3cc(C)ccc3C)nnn2c2ccsc12											1	0	4.3998	12.1891	5.1679	4.3998	Cc1cccc(-c2nc(Nc3ccncc3)c3c(C)csc3n2)n1	564250
[truncated: 18,121 more rows]

## Sheet: supp.T13 Band3-Pubchem
type	ID	ID	posX	posY	posZ	Smiles		type	ID	posX	posY	posZ	posX_4dp	Matched_SMILES	Matched_ID
[truncated: 15,340 more rows]

## Sheet: supp.T14 Band4-PubchemFP
type	ID	ID	posX	posY	posZ	Smiles			type	ID	posX	posY	posZ
[truncated: 31,386 more rows]

[truncated: 2 more sheets: supp.T15 Band5-MACCFP, supp.T16 Band6-pharmacoPFP]
