# Supplementary material for: Molecular-substructure Deep Autoencoders Cluster Biomolecules into Novel Band-Shaped Substructure-Distinguished Bioactivity Clusters in 3D Latent Space
Source: Research Square preprint supplement (doi:10.21203/rs.3.rs-6755378/v1), 2025-06-16
Supplement: Supplementary file 3 [file 3cc709a292f384e36f2b1f8f.docx]

**Supplement Table 1 Framework of PubChemFP Model with best performance**


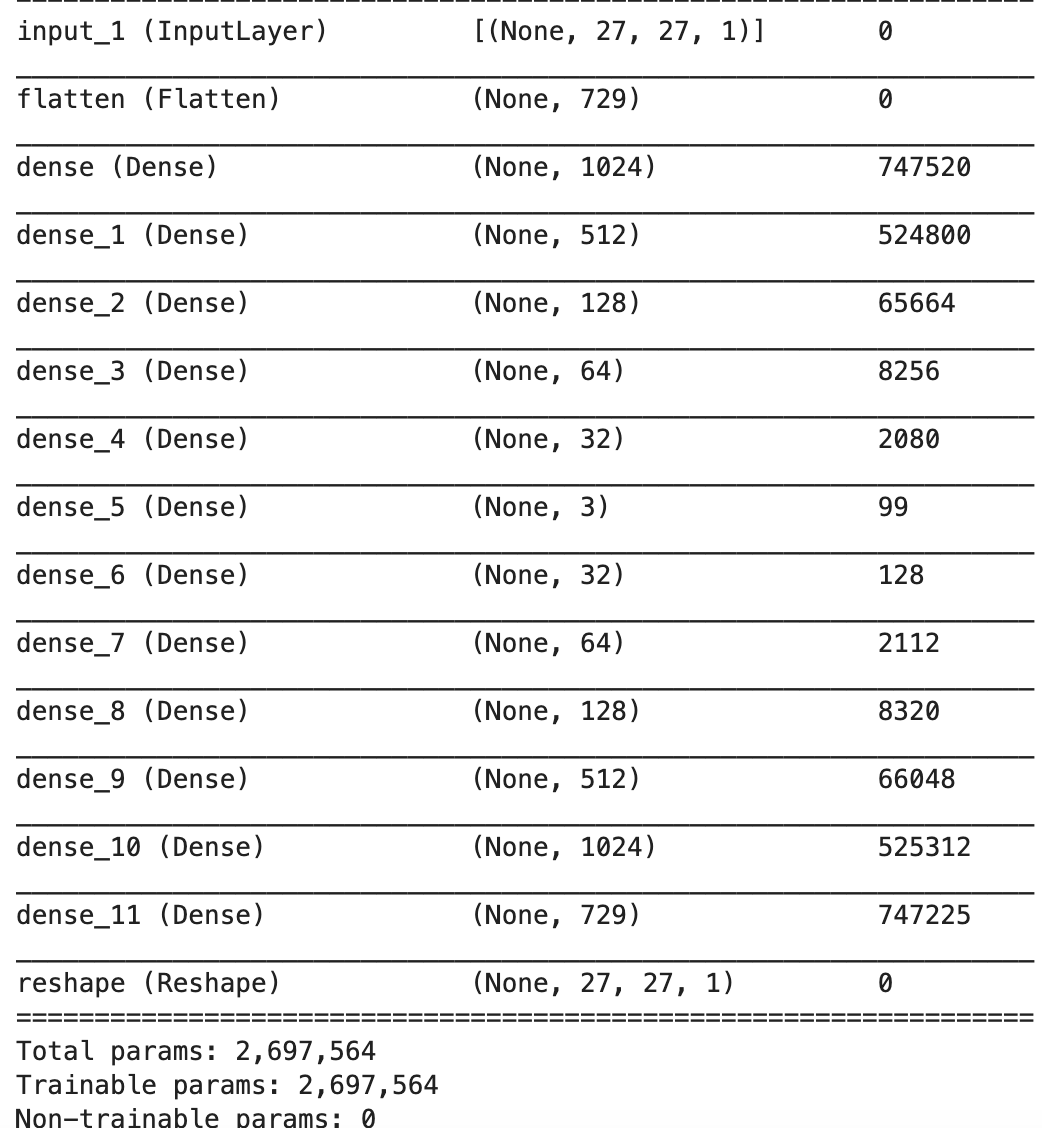


The first column represents input data, the numbering of fully connected layers, and output data. The second column displays the dimensions of input data, the node count of fully connected layers, and the dimensions of output data, with node counts such as "1024," "512," "128," etc. The last column indicates the parameter count required for connections between preceding and subsequent fully connected layers. Each Dense layer is followed by a activation ‘ReLU’ layer until the last reshape layer is preceded by a 'Sigmoid' activation layer.

**Supplement Table 2 Framework of MACCSFP Model with best performance**


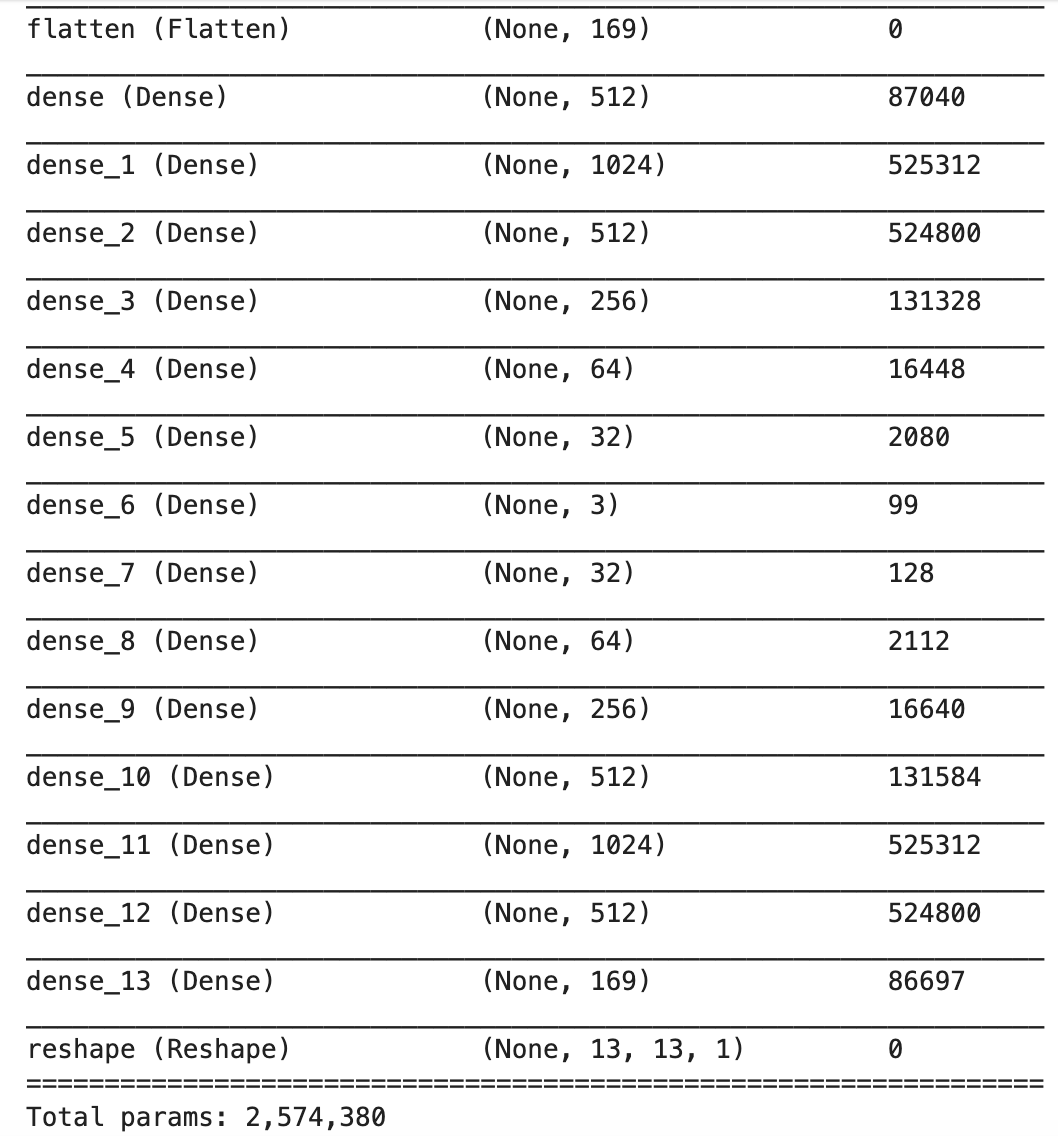


**Supplement Table 3 Framework of PharmacoPFP Model with best performance**


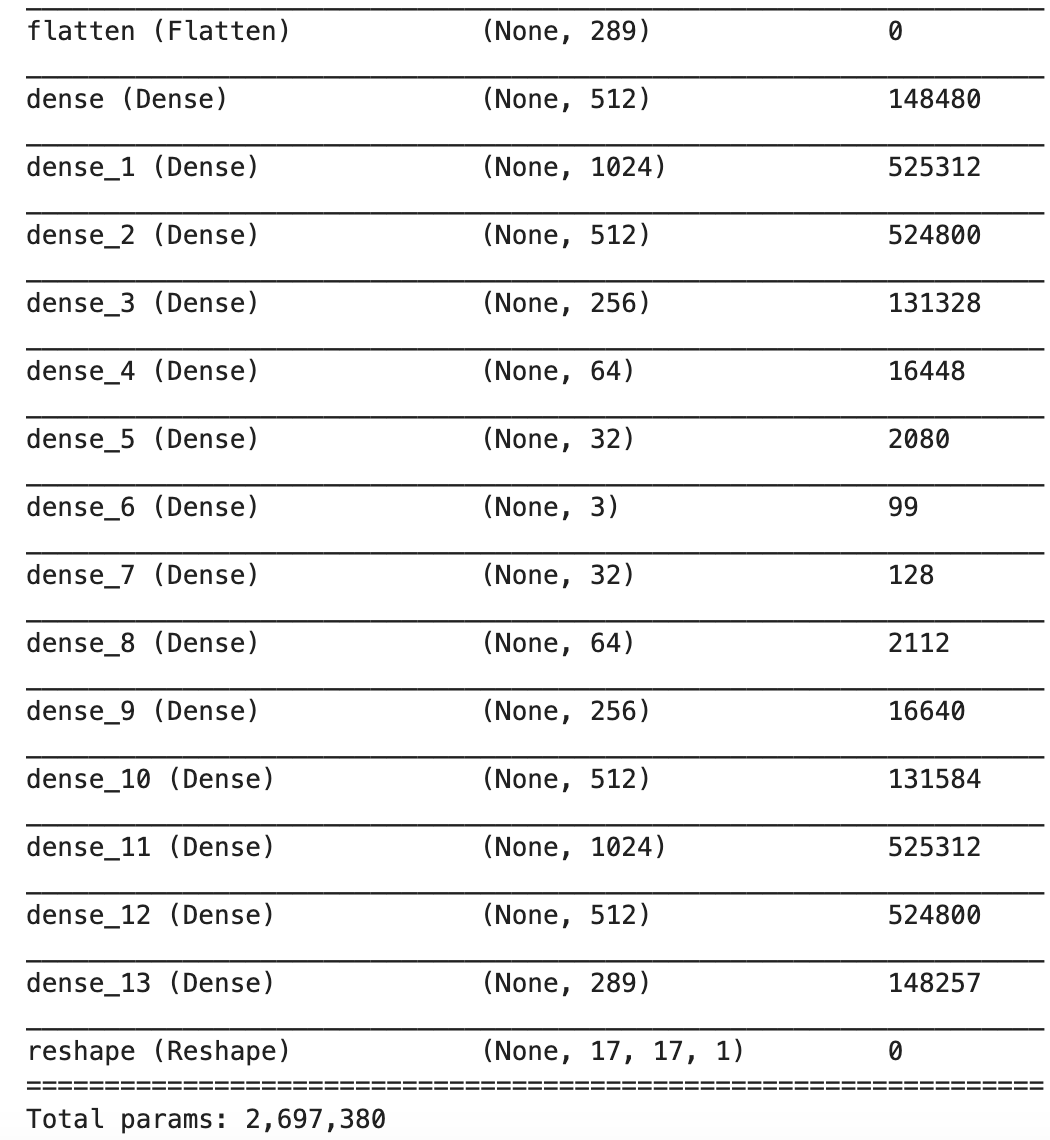


**Supplement Table 4 Comparison of PubChemFP Parameters and Results**

| **Parameter Number** | **Encoder Network Depth** | **Encoder Structure** | **Total Parameter Count** | **MSE** |
| --- | --- | --- | --- | --- |
| **Parameter** 1（best） | 5 | 1024-512-128-64-32 | 2697564 | 0.0245 |
| **Parameter** 2 | 6 | 2048-1024-512-128-64-32 | 8388956 | 0.1400 |
| **Parameter** 3 | 8 | 2048-1024-512-128-64-32-16-8 | 8390140 | 0.0750 |
| **Parameter** 4 | 9 | 2048-1024-512-256-128-64-32-16-8 | 8587260 | 0.0690 |
| **Parameter** 5 | 8 | 1024-512-256-128-64-32-16-8 | 2895868 | 0.0400 |
| **Parameter** 6 | 7 | 1024-512-256-128-64-16-8 | 2892732 | 0.0525 |
| **Parameter 7** | 7 | 2048-1024-256-128-64-32-8 | 7799004 | 0.0800 |
| **Parameter** 8 | 7 | 2048-1024-512-128-64-32-8 | 8389340 | 0.0848 |
| **Parameter** 9 | 4 | 512-128-64-32 | 900444 | 0.0269 |

**Supplement Table 5 Comparison of MACCSFP Parameters and Results**

| **Parameter Number** | **Encoder Network Depth** | **Encoder Structure** | **Total Parameter Count** | **MSE** |
| --- | --- | --- | --- | --- |
| **Parameter** 1 | 5 | 1024-512-128-64-32 | 1550124 | 0.0555 |
| **Parameter** 2 | 5 | 256-128-64-32-16 | 174828 | 0.0520 |
| **Parameter** 3 | 5 | 512-512-256-64-16 | 997292 | 0.0455 |
| **Parameter** 4 | 6 | 256-512-256-128-64-16 | 697516 | 0.0475 |
| **Parameter** 5 | 6 | 512-1024-512-128-64-16 | 2424492 | 0.0455 |
| **Parameter** 6 | 6 | 512-1024-512-256-64-16 | 2572204 | 0.0430 |
| **Parameter 7** | 6 | 512-1024-512-128-64-32 | 2426668 | 0.0462 |
| **Parameter** 8 | 6 | 512-1024-512-128-64-32 | 2426668 | 0.0440 |
| **Parameter** 9（best） | 6 | 512-1024-512-256-64-32 | 2574380 | 0.0390 |

**Supplement Table 6 Comparison of PharmacoPFP Parameters and Results**

| **Parameter Number** | **Encoder Network Depth** | **Encoder Structure** | **Total Parameter Count** | **MSE** |
| --- | --- | --- | --- | --- |
| **Parameter** 1（best） | 6 | 512-1024-512-256-64-32 | 2697380 | 0.0245 |
| **Parameter** 2 | 6 | 1024-512-512-256-64-32 | 2469028 | 0.0250 |
| **Parameter** 3 | 5 | 1024-512-256-64-32 | 1943716 | 0.0260 |
| **Parameter** 4 | 5 | 512-512-256-64-32 | 1122468 | 0.0260 |
